# Supplementary material for: Exploration of the Commonalities and Specificities in Wheat Respond to Aluminum Toxicity and Low Phosphorus via Transcriptomics and Targeted Metabolomics Study
Source: Preprints.org preprint supplement (doi:10.20944/preprints202408.0689.v1), 2024-08-12
Supplement: Supplementary file 1 [file supplementary]

## Sheet: Table S5-1
Table S5-1. Expression and functional annotation of TFs in Fielder_Al vs. CK.
Gene_id	TF family	Fielder_CK	Fielder_Al	Log2(FC)	Regulation	Gene_description	GO_id	GO_term	KO_id	KO_name	Pathway_id	Pathway_definition	EggNOG_id	EggNOG_Functional Categories	NR_hit-name	NR_description	Swiss-Prot_hit-name	Swiss-Prot_description	Pfam_id	Domain	Domain description
TraesCS3D02G141200	AP2	0.086667	0.646667	2.89947	up	-	GO:0006355;GO:0006351;GO:0005634;GO:0003700;GO:000367	BP:regulation of transcription, DNA-templated;BP:transcription, DNA-templated;CC:nucleus;MF:transcription factor activity, sequence-specific DNA binding;MF:DNA binding;	K09286	EREBP	------	------	ENOG411144I	K:Transcription	KAF7028639.1	hypothetical protein CFC21_040525 [Triticum aestivum]	sp|Q39127|TINY_ARATH;	Ethylene-responsive transcription factor TINY OS=Arabidopsis thaliana OX=3702 GN=TINY PE=2 SV=1;	PF00847.22	AP2	AP2 domain
TraesCS5D02G317700	AP2	0.373333	2.12	2.50553	up	CBFIVb-D20 [Source:UniProtKB/TrEMBL;Acc:Q8W236]	GO:0006355;GO:0006351;GO:0005634;GO:0003700;GO:000367	BP:regulation of transcription, DNA-templated;BP:transcription, DNA-templated;CC:nucleus;MF:transcription factor activity, sequence-specific DNA binding;MF:DNA binding;	------	------	------	------	ENOG411074H	K:Transcription	AAL37944.1	putative CRT/DRE-binding factor [Triticum aestivum]	sp|Q8GUW4|DRE1B_ORYSI;	Dehydration-responsive element-binding protein 1B OS=Oryza sativa subsp. indica OX=39946 GN=DREB1B PE=2 SV=1;	PF00847.22	AP2	AP2 domain
TraesCS1D02G230900	AP2	0.266667	1.12	2.07039	up	Ethylene-responsive transcription factor RAP2-3 [Source:Projected from Arabidopsis thaliana (AT3G16770) UniProtKB/Swiss-Prot;Acc:P42736]	GO:0006355;GO:0006351;GO:0005634;GO:0003700;GO:000367	BP:regulation of transcription, DNA-templated;BP:transcription, DNA-templated;CC:nucleus;MF:transcription factor activity, sequence-specific DNA binding;MF:DNA binding;	K09286	EREBP	------	------	ENOG410ZNB5	S:Function unknown	XP_020148477.1	ethylene-responsive transcription factor RAP2-3 [Aegilops tauschii subsp. strangulata]	sp|P42736|RAP23_ARATH;	Ethylene-responsive transcription factor RAP2-3 OS=Arabidopsis thaliana OX=3702 GN=RAP2-3 PE=1 SV=2;	PF00847.22	AP2	AP2 domain
TraesCS5A02G310700	AP2	0.466667	1.68333	1.85086	up	-	GO:0006355;GO:0006351;GO:0005634;GO:0003700;GO:000367	BP:regulation of transcription, DNA-templated;BP:transcription, DNA-templated;CC:nucleus;MF:transcription factor activity, sequence-specific DNA binding;MF:DNA binding;	------	------	------	------	ENOG411074H	K:Transcription	VAI20025.1	unnamed protein product [Triticum turgidum subsp. durum]	sp|Q3T5N4|DRE1B_ORYSJ;	Dehydration-responsive element-binding protein 1B OS=Oryza sativa subsp. japonica OX=39947 GN=DREB1B PE=2 SV=1;	PF00847.22	AP2	AP2 domain
TraesCS5A02G310500	AP2	0.583333	1.51	1.37216	up	CBFIVd-A22 [Source:UniProtKB/TrEMBL;Acc:A0MPM3]	GO:0006355;GO:0006351;GO:0005634;GO:0003700;GO:000367	BP:regulation of transcription, DNA-templated;BP:transcription, DNA-templated;CC:nucleus;MF:transcription factor activity, sequence-specific DNA binding;MF:DNA binding;	------	------	------	------	ENOG411074H	K:Transcription	ABK55388.1	CBFIVd-A22 [Triticum aestivum]	sp|Q8GUW4|DRE1B_ORYSI;	Dehydration-responsive element-binding protein 1B OS=Oryza sativa subsp. indica OX=39946 GN=DREB1B PE=2 SV=1;	PF00847.22	AP2	AP2 domain
TraesCS6D02G309600	AP2	10.52	5.02333	-1.06642	down	-	GO:0006355;GO:0005634;GO:0003700;GO:000367	BP:regulation of transcription, DNA-templated;CC:nucleus;MF:transcription factor activity, sequence-specific DNA binding;MF:DNA binding;	------	------	------	------	ENOG410YX49	K:Transcription	KAF7091329.1	hypothetical protein CFC21_093924 [Triticum aestivum]	sp|Q9CAP4|ERF13_ARATH;	Ethylene-responsive transcription factor ERF013 OS=Arabidopsis thaliana OX=3702 GN=ERF013 PE=2 SV=1;	PF00847.22	AP2	AP2 domain
TraesCS1D02G376800	AP2	2.17667	1.03667	-1.07017	down	-	GO:0006355;GO:0006351;GO:0005634;GO:0003700;GO:000367	BP:regulation of transcription, DNA-templated;BP:transcription, DNA-templated;CC:nucleus;MF:transcription factor activity, sequence-specific DNA binding;MF:DNA binding;	------	------	------	------	ENOG410YN6X;ENOG410YY7D	K:Transcription;	KAF6997261.1	hypothetical protein CFC21_013504 [Triticum aestivum]	sp|Q9SZ06|EF109_ARATH;	Ethylene-responsive transcription factor ERF109 OS=Arabidopsis thaliana OX=3702 GN=ERF109 PE=1 SV=1;	PF00847.22	AP2	AP2 domain
TraesCS5D02G318900	AP2	8.96333	3.91	-1.19687	down	CBFIIIa-D6 [Source:UniProtKB/TrEMBL;Acc:A0MPJ5]	GO:0006355;GO:0006351;GO:0005634;GO:0003700;GO:000367	BP:regulation of transcription, DNA-templated;BP:transcription, DNA-templated;CC:nucleus;MF:transcription factor activity, sequence-specific DNA binding;MF:DNA binding;	------	------	------	------	ENOG41105XZ;ENOG41105QS	K:Transcription;S:Function unknown	XP_020181566.1	dehydration-responsive element-binding protein 1A-like [Aegilops tauschii subsp. strangulata]	sp|A2Z389|DRE1A_ORYSI;	Dehydration-responsive element-binding protein 1A OS=Oryza sativa subsp. indica OX=39946 GN=DREB1A PE=3 SV=1;	PF00847.22	AP2	AP2 domain
TraesCS6B02G350400	AP2	2.88667	1.10667	-1.38318	down	-	GO:0006355;GO:0006351;GO:0005634;GO:0003700;GO:000367	BP:regulation of transcription, DNA-templated;BP:transcription, DNA-templated;CC:nucleus;MF:transcription factor activity, sequence-specific DNA binding;MF:DNA binding;	------	------	------	------	ENOG41105NJ	S:Function unknown	KAF7091172.1	hypothetical protein CFC21_093811 [Triticum aestivum]	sp|Q70II3|EF110_ARATH;	Ethylene-responsive transcription factor ERF110 OS=Arabidopsis thaliana OX=3702 GN=ERF110 PE=2 SV=2;	PF00847.22	AP2	AP2 domain
TraesCS6B02G361400	AP2	5.15333	1.83667	-1.48842	down	-	GO:0006355;GO:0006351;GO:0005634;GO:0003700;GO:000367	BP:regulation of transcription, DNA-templated;BP:transcription, DNA-templated;CC:nucleus;MF:transcription factor activity, sequence-specific DNA binding;MF:DNA binding;	------	------	------	------	ENOG410YX49	K:Transcription	KAF7086146.1	hypothetical protein CFC21_089479 [Triticum aestivum]	sp|Q9CAP4|ERF13_ARATH;	Ethylene-responsive transcription factor ERF013 OS=Arabidopsis thaliana OX=3702 GN=ERF013 PE=2 SV=1;	PF00847.22	AP2	AP2 domain
TraesCS1A02G218100	AP2	2.27333	0.77	-1.56188	down	-	GO:0010200;GO:0000302;GO:0009624;GO:0010087;GO:0006355;GO:0006351;GO:0009644;GO:0051301;GO:0005634;GO:0003700;GO:0000976;GO:000367	BP:response to chitin;BP:response to reactive oxygen species;BP:response to nematode;BP:phloem or xylem histogenesis;BP:regulation of transcription, DNA-templated;BP:transcription, DNA-templated;BP:response to high light intensity;BP:cell division;CC:nucleus;MF:transcription factor activity, sequence-specific DNA binding;MF:transcription regulatory region sequence-specific DNA binding;MF:DNA bind…	K09286	EREBP	------	------	ENOG410ZM5J;ENOG410Z37D	S:Function unknown;K:Transcription	XP_037412549.1	ethylene-responsive transcription factor 6-like [Triticum dicoccoides]	sp|Q40478|ERF5_TOBAC;	Ethylene-responsive transcription factor 5 OS=Nicotiana tabacum OX=4097 GN=ERF5 PE=2 SV=1;	PF00847.22	AP2	AP2 domain
TraesCS1A02G370600	AP2	1.80333	0.463333	-1.96054	down	-	GO:0006355;GO:0006351;GO:0005634;GO:0003700;GO:000367	BP:regulation of transcription, DNA-templated;BP:transcription, DNA-templated;CC:nucleus;MF:transcription factor activity, sequence-specific DNA binding;MF:DNA binding;	------	------	------	------	ENOG410YN6X;ENOG410YY7D	K:Transcription;	XP_037424937.1	ethylene-responsive transcription factor ERF109-like [Triticum dicoccoides]	sp|Q9SZ06|EF109_ARATH;	Ethylene-responsive transcription factor ERF109 OS=Arabidopsis thaliana OX=3702 GN=ERF109 PE=1 SV=1;	PF00847.22	AP2	AP2 domain
TraesCS6D02G299100	AP2	1.39	0.306667	-2.18034	down	-	GO:0006355;GO:0006351;GO:0005634;GO:0003700;GO:000367	BP:regulation of transcription, DNA-templated;BP:transcription, DNA-templated;CC:nucleus;MF:transcription factor activity, sequence-specific DNA binding;MF:DNA binding;	------	------	------	------	ENOG41105NJ	S:Function unknown	KAF7091172.1	hypothetical protein CFC21_093811 [Triticum aestivum]	sp|Q70II3|EF110_ARATH;	Ethylene-responsive transcription factor ERF110 OS=Arabidopsis thaliana OX=3702 GN=ERF110 PE=2 SV=2;	PF00847.22	AP2	AP2 domain
TraesCS2B02G127800	AP2	0.343333	0.07	-2.29418	down	Ethylene-responsive transcription factor ERF071 [Source:Projected from Arabidopsis thaliana (AT2G47520) UniProtKB/Swiss-Prot;Acc:O22259]	GO:2000280;GO:0006355;GO:0006351;GO:0034059;GO:0005634;GO:0003700;GO:000367	BP:regulation of root development;BP:regulation of transcription, DNA-templated;BP:transcription, DNA-templated;BP:response to anoxia;CC:nucleus;MF:transcription factor activity, sequence-specific DNA binding;MF:DNA binding;	K09286	EREBP	------	------	ENOG41124AA	K:Transcription	KAF7006786.1	hypothetical protein CFC21_021792 [Triticum aestivum]	sp|Q8H0T5|ERF73_ARATH;	Ethylene-responsive transcription factor ERF073 OS=Arabidopsis thaliana OX=3702 GN=ERF073 PE=1 SV=2;	PF00847.22	AP2	AP2 domain
TraesCS7D02G052400	AP2	2.20333	0.446667	-2.30242	down	CBFII-5.2 [Source:UniProtKB/TrEMBL;Acc:A0MPJ1]	GO:0006355;GO:0006351;GO:0005634;GO:0003700;GO:000367	BP:regulation of transcription, DNA-templated;BP:transcription, DNA-templated;CC:nucleus;MF:transcription factor activity, sequence-specific DNA binding;MF:DNA binding;	------	------	------	------	ENOG411074Q;ENOG410YK37	K:Transcription;	XP_020162370.1	dehydration-responsive element-binding protein 1C [Aegilops tauschii subsp. strangulata]	sp|A2Y8S6|DRE1C_ORYSI;	Dehydration-responsive element-binding protein 1C OS=Oryza sativa subsp. indica OX=39946 GN=DREB1C PE=3 SV=1;	PF00847.22	AP2	AP2 domain
TraesCS1D02G376600	AP2	3.37667	0.66	-2.35506	down	-	GO:0006355;GO:0005634;GO:0003700;GO:000367	BP:regulation of transcription, DNA-templated;CC:nucleus;MF:transcription factor activity, sequence-specific DNA binding;MF:DNA binding;	------	------	------	------	ENOG410YN6X	K:Transcription	KAF6997259.1	hypothetical protein CFC21_013502 [Triticum aestivum]	sp|Q9SZ06|EF109_ARATH;	Ethylene-responsive transcription factor ERF109 OS=Arabidopsis thaliana OX=3702 GN=ERF109 PE=1 SV=1;	PF00847.22	AP2	AP2 domain
TraesCS1D02G376700	AP2	2.6	0.506667	-2.3594	down	-	GO:0006355;GO:0006351;GO:0005634;GO:0003700;GO:000367	BP:regulation of transcription, DNA-templated;BP:transcription, DNA-templated;CC:nucleus;MF:transcription factor activity, sequence-specific DNA binding;MF:DNA binding;	------	------	------	------	ENOG410YN6X;ENOG410YY7D	K:Transcription;	KAF6997260.1	hypothetical protein CFC21_013503 [Triticum aestivum]	sp|Q9SZ06|EF109_ARATH;	Ethylene-responsive transcription factor ERF109 OS=Arabidopsis thaliana OX=3702 GN=ERF109 PE=1 SV=1;	PF00847.22	AP2	AP2 domain
TraesCS5B02G312700	AP2	1.68	0.316667	-2.40742	down	CBFIIIc-3.1 (Fragment) [Source:UniProtKB/TrEMBL;Acc:A0MPJ6]	GO:0006355;GO:0006351;GO:0005634;GO:0003700;GO:000367	BP:regulation of transcription, DNA-templated;BP:transcription, DNA-templated;CC:nucleus;MF:transcription factor activity, sequence-specific DNA binding;MF:DNA binding;	------	------	------	------	ENOG410YK37	K:Transcription	ABK55361.1	CBFIIIc-3.1, partial [Triticum aestivum]	sp|A2Z388|DRE1H_ORYSI;	Dehydration-responsive element-binding protein 1H OS=Oryza sativa subsp. indica OX=39946 GN=DREB1H PE=2 SV=1;	PF00847.22	AP2	AP2 domain
TraesCS4A02G433200	AP2	3.25667	0.55	-2.56589	down	CBFII-5.3 [Source:UniProtKB/TrEMBL;Acc:A0MPJ2]	GO:0006355;GO:0006351;GO:0005634;GO:0003700;GO:000367	BP:regulation of transcription, DNA-templated;BP:transcription, DNA-templated;CC:nucleus;MF:transcription factor activity, sequence-specific DNA binding;MF:DNA binding;	------	------	------	------	ENOG411074Q;ENOG410YK37	K:Transcription;	ABK55357.1	CBFII-5.3 [Triticum aestivum]	sp|A2Y8S6|DRE1C_ORYSI;	Dehydration-responsive element-binding protein 1C OS=Oryza sativa subsp. indica OX=39946 GN=DREB1C PE=3 SV=1;	PF00847.22	AP2	AP2 domain
TraesCS2D02G464400	AP2	1.08333	0.173333	-2.64386	down	-	GO:0006355;GO:0006351;GO:0009873;GO:0005634;GO:0003700;GO:000367	BP:regulation of transcription, DNA-templated;BP:transcription, DNA-templated;BP:ethylene-activated signaling pathway;CC:nucleus;MF:transcription factor activity, sequence-specific DNA binding;MF:DNA binding;	K14516	ERF1	map04016;map04075	MAPK signaling pathway - plant;Plant hormone signal transduction	ENOG41114BY	K:Transcription	KAF7018463.1	hypothetical protein CFC21_031753 [Triticum aestivum]	sp|Q8LDC8|ERF92_ARATH;	Ethylene-responsive transcription factor 1B OS=Arabidopsis thaliana OX=3702 GN=ERF1B PE=1 SV=2;	PF00847.22	AP2	AP2 domain
TraesCS7A02G057700	AP2	2.51	0.4	-2.64962	down	AP2 domain CBF protein [Source:UniProtKB/TrEMBL;Acc:K9M7E0]	GO:0006355;GO:0006351;GO:0005634;GO:0003700;GO:000367	BP:regulation of transcription, DNA-templated;BP:transcription, DNA-templated;CC:nucleus;MF:transcription factor activity, sequence-specific DNA binding;MF:DNA binding;	------	------	------	------	ENOG411074Q;ENOG410YK37	K:Transcription;	AFR67797.1	AP2 domain CBF protein [Triticum aestivum]	sp|A2Y8S6|DRE1C_ORYSI;	Dehydration-responsive element-binding protein 1C OS=Oryza sativa subsp. indica OX=39946 GN=DREB1C PE=3 SV=1;	PF00847.22	AP2	AP2 domain
TraesCS5D02G245300	AP2	3.54667	0.496667	-2.83611	down	-	GO:0006355;GO:0005634;GO:0003700;GO:000367	BP:regulation of transcription, DNA-templated;CC:nucleus;MF:transcription factor activity, sequence-specific DNA binding;MF:DNA binding;	------	------	------	------	ENOG410YY7D;ENOG410YN6X	K:Transcription;	XP_020177674.1	ethylene-responsive transcription factor ERF109 [Aegilops tauschii subsp. strangulata]	sp|Q9SZ06|EF109_ARATH;	Ethylene-responsive transcription factor ERF109 OS=Arabidopsis thaliana OX=3702 GN=ERF109 PE=1 SV=1;	PF00847.22	AP2	AP2 domain
TraesCS6B02G268100	AP2	0.81	0.11	-2.88042	down	AP2 domain CBF protein [Source:UniProtKB/TrEMBL;Acc:K9M7V3]	GO:0006355;GO:0006351;GO:0005634;GO:0003700;GO:000367	BP:regulation of transcription, DNA-templated;BP:transcription, DNA-templated;CC:nucleus;MF:transcription factor activity, sequence-specific DNA binding;MF:DNA binding;	------	------	------	------	ENOG410YK37	K:Transcription	XP_037453689.1	dehydration-responsive element-binding protein 1G-like [Triticum dicoccoides]	sp|A2XWL6|DRE1E_ORYSI;	Dehydration-responsive element-binding protein 1E OS=Oryza sativa subsp. indica OX=39946 GN=DREB1E PE=3 SV=1;	PF00847.22	AP2	AP2 domain
TraesCS5A02G238400	AP2	1.58333	0.203333	-2.96105	down	-	GO:0006355;GO:0006351;GO:0005634;GO:0003700;GO:000367	BP:regulation of transcription, DNA-templated;BP:transcription, DNA-templated;CC:nucleus;MF:transcription factor activity, sequence-specific DNA binding;MF:DNA binding;	------	------	------	------	ENOG410YY7D;ENOG410YN6X	K:Transcription;	KAF7059191.1	hypothetical protein CFC21_066126 [Triticum aestivum]	sp|Q9SZ06|EF109_ARATH;	Ethylene-responsive transcription factor ERF109 OS=Arabidopsis thaliana OX=3702 GN=ERF109 PE=1 SV=1;	PF00847.22	AP2	AP2 domain
TraesCS1A02G411100	AP2	0.273333	0.033333	-3.03564	down	Ethylene-responsive transcription factor ERF061 [Source:Projected from Arabidopsis thaliana (AT1G64380) UniProtKB/Swiss-Prot;Acc:Q9C7W2]	GO:0010200;GO:0006355;GO:0006351;GO:0005634;GO:0003700;GO:000367	BP:response to chitin;BP:regulation of transcription, DNA-templated;BP:transcription, DNA-templated;CC:nucleus;MF:transcription factor activity, sequence-specific DNA binding;MF:DNA binding;	------	------	------	------	ENOG410YMKN	K:Transcription	KAF6986486.1	hypothetical protein CFC21_004233 [Triticum aestivum]	sp|Q9C7W2|ERF61_ARATH;	Ethylene-responsive transcription factor ERF061 OS=Arabidopsis thaliana OX=3702 GN=ERF061 PE=2 SV=1;	PF00847.22	AP2	AP2 domain
TraesCS6D02G320700	AP2	0.33	0.013333	-4.62939	down	-	GO:0006355;GO:0006351;GO:0005634;GO:0003700;GO:000367	BP:regulation of transcription, DNA-templated;BP:transcription, DNA-templated;CC:nucleus;MF:transcription factor activity, sequence-specific DNA binding;MF:DNA binding;	------	------	------	------	ENOG410YZF0	K:Transcription	KAF7091451.1	hypothetical protein CFC21_094029 [Triticum aestivum]	sp|Q9C591|ERF16_ARATH;	Ethylene-responsive transcription factor ERF016 OS=Arabidopsis thaliana OX=3702 GN=ERF016 PE=2 SV=1;	PF00847.22	AP2	AP2 domain
TraesCS1D02G378400	B3	0.146667	0.616667	2.07195	up	-	GO:0006355;GO:0005634;GO:0003700;GO:000367	BP:regulation of transcription, DNA-templated;CC:nucleus;MF:transcription factor activity, sequence-specific DNA binding;MF:DNA binding;	K09287	RAV	------	------	ENOG4110AU5	K:Transcription	XP_020159692.1	AP2/ERF and B3 domain-containing protein Os05g0549800-like [Aegilops tauschii subsp. strangulata]	sp|Q8RZX9|Y1934_ORYSJ;	AP2/ERF and B3 domain-containing protein Os01g0693400 OS=Oryza sativa subsp. japonica OX=39947 GN=Os01g0693400 PE=2 SV=1;	PF02362.23;PF00847.22	B3;AP2	B3 DNA binding domain;AP2 domain
TraesCS4A02G198300	B3	1.16	3.72667	1.68376	up	-	GO:0006355;GO:0006351;GO:0005634;GO:000367	BP:regulation of transcription, DNA-templated;BP:transcription, DNA-templated;CC:nucleus;MF:DNA binding;	------	------	------	------	ENOG410YIJZ	K:Transcription	XP_037421590.1	B3 domain-containing protein Os11g0156000-like [Triticum dicoccoides]	sp|Q53QI0|Y1160_ORYSJ;	B3 domain-containing protein Os11g0156000 OS=Oryza sativa subsp. japonica OX=39947 GN=Os11g0156000 PE=2 SV=1;	PF02362.23	B3	B3 DNA binding domain
TraesCS2B02G482400	B3	1.33	3.51667	1.40278	up	-	GO:0006355;GO:0006351;GO:0005634;GO:000367	BP:regulation of transcription, DNA-templated;BP:transcription, DNA-templated;CC:nucleus;MF:DNA binding;	------	------	------	------	ENOG410YIJZ	K:Transcription	VAH51921.1	unnamed protein product [Triticum turgidum subsp. durum]	sp|Q53QI0|Y1160_ORYSJ;	B3 domain-containing protein Os11g0156000 OS=Oryza sativa subsp. japonica OX=39947 GN=Os11g0156000 PE=2 SV=1;	PF02362.23	B3	B3 DNA binding domain
TraesCS4B02G117100	B3	1.13333	2.93333	1.37197	up	-	GO:0006355;GO:0006351;GO:0005634;GO:000367	BP:regulation of transcription, DNA-templated;BP:transcription, DNA-templated;CC:nucleus;MF:DNA binding;	------	------	------	------	ENOG410YIJZ	K:Transcription	VAI03679.1	unnamed protein product [Triticum turgidum subsp. durum]	sp|Q53QI0|Y1160_ORYSJ;	B3 domain-containing protein Os11g0156000 OS=Oryza sativa subsp. japonica OX=39947 GN=Os11g0156000 PE=2 SV=1;	PF02362.23	B3	B3 DNA binding domain
TraesCS4D02G114900	B3	2	4.41333	1.14187	up	-	GO:0005634;GO:000367	CC:nucleus;MF:DNA binding;	------	------	------	------	ENOG410YIJZ	K:Transcription	KAF7053122.1	hypothetical protein CFC21_061108 [Triticum aestivum]	sp|Q53QI0|Y1160_ORYSJ;	B3 domain-containing protein Os11g0156000 OS=Oryza sativa subsp. japonica OX=39947 GN=Os11g0156000 PE=2 SV=1;	PF02362.23	B3	B3 DNA binding domain
TraesCS1D02G378500	B3	0.343333	0.966667	1.49341	up	-	GO:0006355;GO:0006351;GO:0005634;GO:0003700;GO:000367	BP:regulation of transcription, DNA-templated;BP:transcription, DNA-templated;CC:nucleus;MF:transcription factor activity, sequence-specific DNA binding;MF:DNA binding;	K09287	RAV	------	------	ENOG4110AU5	K:Transcription	KAF6997281.1	hypothetical protein CFC21_013521 [Triticum aestivum]	sp|Q8RZX9|Y1934_ORYSJ;	AP2/ERF and B3 domain-containing protein Os01g0693400 OS=Oryza sativa subsp. japonica OX=39947 GN=Os01g0693400 PE=2 SV=1;	PF02362.23;PF00847.22	B3;AP2	B3 DNA binding domain;AP2 domain
TraesCS3A02G252900	bHLH	3.42667	1.67667	-1.03121	down	-	GO:004698	MF:protein dimerization activity;	------	------	------	------	ENOG41114N5	K:Transcription	KAF7023259.1	hypothetical protein CFC21_035820 [Triticum aestivum]	sp|Q9ZPY8|AIB_ARATH;	Transcription factor ABA-INDUCIBLE bHLH-TYPE OS=Arabidopsis thaliana OX=3702 GN=AIB PE=2 SV=2;	PF14215.8;PF00010.28	bHLH-MYC_N;HLH	bHLH-MYC and R2R3-MYB transcription factors N-terminal;Helix-loop-helix DNA-binding domain
TraesCS3D02G253700	bHLH	2.8	1.27667	-1.13304	down	-	GO:004698	MF:protein dimerization activity;	------	------	------	------	ENOG41114N5	K:Transcription	KAF7037257.1	hypothetical protein CFC21_047678 [Triticum aestivum]	sp|Q9ZPY8|AIB_ARATH;	Transcription factor ABA-INDUCIBLE bHLH-TYPE OS=Arabidopsis thaliana OX=3702 GN=AIB PE=2 SV=2;	PF14215.8;PF00010.28	bHLH-MYC_N;HLH	bHLH-MYC and R2R3-MYB transcription factors N-terminal;Helix-loop-helix DNA-binding domain
TraesCS3D02G495700	bHLH	0.03	0.773333	4.68806	up	-	GO:0006357;GO:0003700;GO:0046983;GO:000367	BP:regulation of transcription from RNA polymerase II promoter;MF:transcription factor activity, sequence-specific DNA binding;MF:protein dimerization activity;MF:DNA binding;	------	------	------	------	ENOG410YP85;ENOG410ZMQF	K:Transcription;	KAF7040296.1	hypothetical protein CFC21_050206 [Triticum aestivum]	sp|A2WZ60|IRO2_ORYSI;	Protein IRON-RELATED TRANSCRIPTION FACTOR 2 OS=Oryza sativa subsp. indica OX=39946 GN=IRO2 PE=3 SV=1;	PF00010.28	HLH	Helix-loop-helix DNA-binding domain
TraesCS7A02G362500	bHLH	0.016667	0.323333	4.27795	up	-	GO:004698	MF:protein dimerization activity;	------	------	------	------	ENOG410YFS3	S:Function unknown	XP_037462345.1	putative transcription factor bHLH041 [Triticum dicoccoides]	sp|Q9LTS4|BH041_ARATH;	Putative transcription factor bHLH041 OS=Arabidopsis thaliana OX=3702 GN=BHLH41 PE=3 SV=1;	PF00010.28	HLH	Helix-loop-helix DNA-binding domain
TraesCS3A02G489700	bHLH	0.026667	0.463333	4.11892	up	-	GO:0006357;GO:0003700;GO:0046983;GO:000367	BP:regulation of transcription from RNA polymerase II promoter;MF:transcription factor activity, sequence-specific DNA binding;MF:protein dimerization activity;MF:DNA binding;	------	------	------	------	ENOG410YP85;ENOG410ZMQF	K:Transcription;	KAF7026058.1	hypothetical protein CFC21_038196 [Triticum aestivum]	sp|A2WZ60|IRO2_ORYSI;	Protein IRON-RELATED TRANSCRIPTION FACTOR 2 OS=Oryza sativa subsp. indica OX=39946 GN=IRO2 PE=3 SV=1;	PF00010.28	HLH	Helix-loop-helix DNA-binding domain
TraesCS6B02G215200	bHLH	0.016667	0.25	3.90686	up	-	GO:004698	MF:protein dimerization activity;	------	------	------	------	ENOG410YFS3	S:Function unknown	KAF7084387.1	hypothetical protein CFC21_088028 [Triticum aestivum]	sp|Q9LTS4|BH041_ARATH;	Putative transcription factor bHLH041 OS=Arabidopsis thaliana OX=3702 GN=BHLH41 PE=3 SV=1;	PF00010.28	HLH	Helix-loop-helix DNA-binding domain
TraesCS3B02G122800	bHLH	0.033333	0.386667	3.53607	up	-	GO:004698	MF:protein dimerization activity;	------	------	------	------	ENOG410ZMUQ	S:Function unknown	KAF7028189.1	hypothetical protein CFC21_040154 [Triticum aestivum]	sp|Q9LTS4|BH041_ARATH;	Putative transcription factor bHLH041 OS=Arabidopsis thaliana OX=3702 GN=BHLH41 PE=3 SV=1;	PF00010.28	HLH	Helix-loop-helix DNA-binding domain
TraesCS3D02G106600	bHLH	0.23	1.25667	2.4499	up	-	GO:004698	MF:protein dimerization activity;	------	------	------	------	ENOG410ZMUQ	S:Function unknown	XP_020164742.1	putative transcription factor bHLH041 [Aegilops tauschii subsp. strangulata]	sp|Q9LTS4|BH041_ARATH;	Putative transcription factor bHLH041 OS=Arabidopsis thaliana OX=3702 GN=BHLH41 PE=3 SV=1;	PF00010.28	HLH	Helix-loop-helix DNA-binding domain
TraesCS3A02G104400	bHLH	0.133333	0.65	2.28541	up	-	GO:004698	MF:protein dimerization activity;	------	------	------	------	ENOG410ZMUQ	S:Function unknown	XP_037409049.1	putative transcription factor bHLH041 [Triticum dicoccoides]	sp|Q9LTS4|BH041_ARATH;	Putative transcription factor bHLH041 OS=Arabidopsis thaliana OX=3702 GN=BHLH41 PE=3 SV=1;	PF00010.28	HLH	Helix-loop-helix DNA-binding domain
TraesCS4A02G404700	bHLH	1.02	3.28	1.68513	up	-	GO:0006355;GO:0006357;GO:0005634;GO:0000978;GO:0046983;GO:000098	BP:regulation of transcription, DNA-templated;BP:regulation of transcription from RNA polymerase II promoter;CC:nucleus;MF:RNA polymerase II core promoter proximal region sequence-specific DNA binding;MF:protein dimerization activity;MF:RNA polymerase II transcription factor activity, sequence-specific DNA binding;	------	------	------	------	ENOG410YF8H	K:Transcription	XP_037423189.1	transcription factor bHLH96-like [Triticum dicoccoides]	sp|Q9C7T4|BH096_ARATH;	Transcription factor bHLH96 OS=Arabidopsis thaliana OX=3702 GN=BHLH96 PE=1 SV=1;	PF00010.28	HLH	Helix-loop-helix DNA-binding domain
TraesCS4D02G302700	bHLH	1.42	4.08667	1.52503	up	-	GO:0006355;GO:0006357;GO:0005634;GO:0000978;GO:0046983;GO:000098	BP:regulation of transcription, DNA-templated;BP:regulation of transcription from RNA polymerase II promoter;CC:nucleus;MF:RNA polymerase II core promoter proximal region sequence-specific DNA binding;MF:protein dimerization activity;MF:RNA polymerase II transcription factor activity, sequence-specific DNA binding;	------	------	------	------	ENOG410YF8H	K:Transcription	XP_020153287.1	transcription factor bHLH96 [Aegilops tauschii subsp. strangulata]	sp|Q9C7T4|BH096_ARATH;	Transcription factor bHLH96 OS=Arabidopsis thaliana OX=3702 GN=BHLH96 PE=1 SV=1;	PF00010.28	HLH	Helix-loop-helix DNA-binding domain
TraesCS4B02G304500	bHLH	2.79	5.96333	1.09585	up	-	GO:0006355;GO:0006357;GO:0005634;GO:0000978;GO:0046983;GO:000098	BP:regulation of transcription, DNA-templated;BP:regulation of transcription from RNA polymerase II promoter;CC:nucleus;MF:RNA polymerase II core promoter proximal region sequence-specific DNA binding;MF:protein dimerization activity;MF:RNA polymerase II transcription factor activity, sequence-specific DNA binding;	------	------	------	------	ENOG410YF8H	K:Transcription	KAF7050666.1	hypothetical protein CFC21_059000 [Triticum aestivum]	sp|Q9C7T4|BH096_ARATH;	Transcription factor bHLH96 OS=Arabidopsis thaliana OX=3702 GN=BHLH96 PE=1 SV=1;	PF00010.28	HLH	Helix-loop-helix DNA-binding domain
TraesCS3A02G204800	bHLH	28.0733	12.9233	-1.11922	down	-	GO:004698	MF:protein dimerization activity;	------	------	------	------	ENOG410YFS3	S:Function unknown	VAH61126.1	unnamed protein product [Triticum turgidum subsp. durum]	sp|Q9LTS4|BH041_ARATH;	Putative transcription factor bHLH041 OS=Arabidopsis thaliana OX=3702 GN=BHLH41 PE=3 SV=1;	PF00010.28	HLH	Helix-loop-helix DNA-binding domain
TraesCS5A02G049600	bHLH	0.973333	0.363333	-1.42164	down	-	GO:0005634;GO:004698	CC:nucleus;MF:protein dimerization activity;	K16189	PIF4	map04075	Plant hormone signal transduction	ENOG410YAGK	K:Transcription	KAF7056859.1	hypothetical protein CFC21_064232 [Triticum aestivum]	sp|Q10CH5|PIL13_ORYSJ;	Transcription factor PHYTOCHROME INTERACTING FACTOR-LIKE 13 OS=Oryza sativa subsp. japonica OX=39947 GN=PIL13 PE=1 SV=1;	PF00010.28	HLH	Helix-loop-helix DNA-binding domain
TraesCS5A02G380900	bHLH	2.54667	0.77	-1.72568	down	-	GO:0009414;GO:004698	BP:response to water deprivation;MF:protein dimerization activity;	------	------	------	------	ENOG410YV10	K:Transcription	XP_037436070.1	transcription factor BHLH148-like isoform X1 [Triticum dicoccoides]	sp|Q75KV9|BH148_ORYSJ;	Transcription factor BHLH148 OS=Oryza sativa subsp. japonica OX=39947 GN=BHLH148 PE=1 SV=1;	PF00010.28	HLH	Helix-loop-helix DNA-binding domain
TraesCS5B02G384500	bHLH	4.71	1.26	-1.9023	down	-	GO:0009414;GO:004698	BP:response to water deprivation;MF:protein dimerization activity;	------	------	------	------	ENOG410YV10	K:Transcription	XP_037443359.1	transcription factor BHLH148-like isoform X1 [Triticum dicoccoides]	sp|Q75KV9|BH148_ORYSJ;	Transcription factor BHLH148 OS=Oryza sativa subsp. japonica OX=39947 GN=BHLH148 PE=1 SV=1;	PF00010.28	HLH	Helix-loop-helix DNA-binding domain
TraesCS5B02G235200	bHLH	2.76333	0.723333	-1.93368	down	-	GO:004698	MF:protein dimerization activity;	------	------	------	------	ENOG410YJCH	K:Transcription	KAF7065822.1	hypothetical protein CFC21_071894 [Triticum aestivum]	sp|Q9FHA7|HEC1_ARATH;	Transcription factor HEC1 OS=Arabidopsis thaliana OX=3702 GN=HEC1 PE=1 SV=1;	PF00010.28	HLH	Helix-loop-helix DNA-binding domain
TraesCS5D02G390700	bHLH	12.2	2.69	-2.1812	down	-	GO:0009414;GO:004698	BP:response to water deprivation;MF:protein dimerization activity;	------	------	------	------	ENOG410YV10	K:Transcription	KAF7074584.1	hypothetical protein CFC21_079429 [Triticum aestivum]	sp|Q75KV9|BH148_ORYSJ;	Transcription factor BHLH148 OS=Oryza sativa subsp. japonica OX=39947 GN=BHLH148 PE=1 SV=1;	PF00010.28	HLH	Helix-loop-helix DNA-binding domain
TraesCS2D02G270300	bHLH	3.43	0.556667	-2.62332	down	Transcription factor bHLH27 [Source:Projected from Arabidopsis thaliana (AT4G29930) UniProtKB/Swiss-Prot;Acc:Q700E3]	GO:004698	MF:protein dimerization activity;	------	------	------	------	ENOG410YDYS	K:Transcription	XP_020160196.1	transcription factor bHLH35 [Aegilops tauschii subsp. strangulata]	sp|Q0JEB7|BH006_ORYSJ;	Transcription factor BHLH6 OS=Oryza sativa subsp. japonica OX=39947 GN=BHLH6 PE=1 SV=1;	PF00010.28	HLH	Helix-loop-helix DNA-binding domain
TraesCS2B02G289900	bHLH	3.11	0.503333	-2.62733	down	BHLH27 [Source:UniProtKB/TrEMBL;Acc:W5BCK3]	GO:0006355;GO:0005634;GO:0003700;GO:0000976;GO:004698	BP:regulation of transcription, DNA-templated;CC:nucleus;MF:transcription factor activity, sequence-specific DNA binding;MF:transcription regulatory region sequence-specific DNA binding;MF:protein dimerization activity;	------	------	------	------	ENOG410YDYS	K:Transcription	XP_037485260.1	transcription factor bHLH35-like [Triticum dicoccoides]	sp|Q0JEB7|BH006_ORYSJ;	Transcription factor BHLH6 OS=Oryza sativa subsp. japonica OX=39947 GN=BHLH6 PE=1 SV=1;	PF00010.28	HLH	Helix-loop-helix DNA-binding domain
TraesCS4B02G021100	bHLH	0.903333	0.013333	-6.08218	down	-	GO:004698	MF:protein dimerization activity;	------	------	------	------	ENOG41107E5	S:Function unknown	KAF7047203.1	hypothetical protein CFC21_056154 [Triticum aestivum]	sp|Q9T072|BH025_ARATH;	Transcription factor bHLH25 OS=Arabidopsis thaliana OX=3702 GN=BHLH25 PE=2 SV=2;	PF00010.28	HLH	Helix-loop-helix DNA-binding domain
TraesCS5B02G491100	C2H2	0.91	0.07	-3.70044	down	-	GO:000367	MF:nucleic acid binding;	------	------	------	------	COG5048	S:Function unknown	KAF7068742.1	hypothetical protein CFC21_074478 [Triticum aestivum]	sp|Q681X4|ZAT5_ARATH;	Zinc finger protein ZAT5 OS=Arabidopsis thaliana OX=3702 GN=ZAT5 PE=2 SV=1;	PF13912.8;PF13894.8;PF00096.28	zf-C2H2_6;zf-C2H2_4;zf-C2H2	C2H2-type zinc finger;C2H2-type zinc finger;Zinc finger, C2H2 type
TraesCS6B02G179000	DBB	14.3	4.84667	-1.56095	down	-	GO:0005634;GO:0008270;GO:000551	CC:nucleus;MF:zinc ion binding;MF:protein binding;	------	------	------	------	COG5641	K:Transcription	KAF7083951.1	hypothetical protein CFC21_087669 [Triticum aestivum]	sp|O82117|CO3_ORYSJ;	Zinc finger protein CO3 OS=Oryza sativa subsp. japonica OX=39947 GN=CO3 PE=2 SV=1;	PF06203.16;PF00643.26	CCT;zf-B_box	CCT motif;B-box zinc finger
TraesCS6D02G140900	DBB	10.1833	3.44	-1.56573	down	-	GO:0005634;GO:0008270;GO:000551	CC:nucleus;MF:zinc ion binding;MF:protein binding;	------	------	------	------	COG5641	K:Transcription	XP_020163882.1	zinc finger protein HD1 isoform X1 [Aegilops tauschii subsp. strangulata]	sp|O82117|CO3_ORYSJ;	Zinc finger protein CO3 OS=Oryza sativa subsp. japonica OX=39947 GN=CO3 PE=2 SV=1;	PF06203.16;PF00643.26	CCT;zf-B_box	CCT motif;B-box zinc finger
TraesCS7A02G383400	DBB	3.15667	6.84	1.11559	up	-	GO:0006355;GO:0009640;GO:0005634;GO:000827	BP:regulation of transcription, DNA-templated;BP:photomorphogenesis;CC:nucleus;MF:zinc ion binding;	------	------	------	------	ENOG410YIAM	S:Function unknown	KAF7097023.1	hypothetical protein CFC21_098890 [Triticum aestivum]	sp|Q0IGM7|BBX20_ARATH;	B-box zinc finger protein 20 OS=Arabidopsis thaliana OX=3702 GN=BBX20 PE=1 SV=1;	PF00643.26;PF16366.7	zf-B_box;CEBP_ZZ	B-box zinc finger;Cytoplasmic polyadenylation element-binding protein ZZ domain
TraesCS6B02G246500	DBB	6.90333	3.41	-1.01752	down	-	GO:0006355;GO:0009640;GO:0005634;GO:0005622;GO:000827	BP:regulation of transcription, DNA-templated;BP:photomorphogenesis;CC:nucleus;CC:intracellular;MF:zinc ion binding;	------	------	------	------	ENOG410YBMW	S:Function unknown	XP_037454224.1	B-box zinc finger protein 25-like [Triticum dicoccoides]	sp|Q9SID1|BBX25_ARATH;	B-box zinc finger protein 25 OS=Arabidopsis thaliana OX=3702 GN=BBX25 PE=1 SV=2;	PF00643.26	zf-B_box	B-box zinc finger
TraesCS6A02G150900	DBB	6.08	2.90667	-1.06471	down	-	GO:0005634;GO:0008270;GO:000551	CC:nucleus;MF:zinc ion binding;MF:protein binding;	------	------	------	------	COG5641	K:Transcription	KAF7078489.1	hypothetical protein CFC21_082914 [Triticum aestivum]	sp|O82117|CO3_ORYSJ;	Zinc finger protein CO3 OS=Oryza sativa subsp. japonica OX=39947 GN=CO3 PE=2 SV=1;	PF06203.16;PF00643.26	CCT;zf-B_box	CCT motif;B-box zinc finger
TraesCS6A02G216400	DBB	2.22	0.87	-1.35147	down	-	GO:0006355;GO:0009640;GO:0005634;GO:000827	BP:regulation of transcription, DNA-templated;BP:photomorphogenesis;CC:nucleus;MF:zinc ion binding;	------	------	------	------	ENOG410YBMW	S:Function unknown	XP_037447336.1	B-box zinc finger protein 25-like [Triticum dicoccoides]	sp|Q9SID1|BBX25_ARATH;	B-box zinc finger protein 25 OS=Arabidopsis thaliana OX=3702 GN=BBX25 PE=1 SV=2;	PF00643.26	zf-B_box	B-box zinc finger
TraesCS2A02G214400	GRAS	8.36	4.08667	-1.03258	down	Similar to Chitin-inducible gibberellin-responsive protein [Source: Projected from Oryza sativa (Os07g0545800)]	GO:0006355;GO:0005634;GO:0003700;GO:004356	BP:regulation of transcription, DNA-templated;CC:nucleus;MF:transcription factor activity, sequence-specific DNA binding;MF:sequence-specific DNA binding;	------	------	------	------	ENOG4111JS8	K:Transcription	KAF7000613.1	hypothetical protein CFC21_016477 [Triticum aestivum]	sp|Q69VG1|CIGR1_ORYSJ;	Chitin-inducible gibberellin-responsive protein 1 OS=Oryza sativa subsp. japonica OX=39947 GN=CIGR1 PE=2 SV=1;	PF03514.16	GRAS	GRAS domain family
TraesCS2D02G198200	GRAS	10.4367	4.92333	-1.08395	down	-	GO:0006355;GO:0005634;GO:0003700;GO:004356	BP:regulation of transcription, DNA-templated;CC:nucleus;MF:transcription factor activity, sequence-specific DNA binding;MF:sequence-specific DNA binding;	------	------	------	------	ENOG4111JS8	K:Transcription	XP_020176499.1	chitin-inducible gibberellin-responsive protein 2 [Aegilops tauschii subsp. strangulata]	sp|Q8GVE1|CIGR2_ORYSJ;	Chitin-inducible gibberellin-responsive protein 2 OS=Oryza sativa subsp. japonica OX=39947 GN=CIGR2 PE=2 SV=1;	PF03514.16	GRAS	GRAS domain family
TraesCS2B02G217500	GRAS	10.25	4.75	-1.10962	down	-	GO:0006355;GO:0005634;GO:0003700;GO:004356	BP:regulation of transcription, DNA-templated;CC:nucleus;MF:transcription factor activity, sequence-specific DNA binding;MF:sequence-specific DNA binding;	------	------	------	------	ENOG4111JS8	K:Transcription	XP_037484396.1	chitin-inducible gibberellin-responsive protein 2-like [Triticum dicoccoides]	sp|Q8GVE1|CIGR2_ORYSJ;	Chitin-inducible gibberellin-responsive protein 2 OS=Oryza sativa subsp. japonica OX=39947 GN=CIGR2 PE=2 SV=1;	PF03514.16	GRAS	GRAS domain family
TraesCS2A02G189600	GRAS	14.0133	5.54333	-1.33797	down	-	GO:0006355;GO:0005634;GO:0003700;GO:004356	BP:regulation of transcription, DNA-templated;CC:nucleus;MF:transcription factor activity, sequence-specific DNA binding;MF:sequence-specific DNA binding;	------	------	------	------	ENOG4111JS8	K:Transcription	XP_037476600.1	chitin-inducible gibberellin-responsive protein 2-like [Triticum dicoccoides]	sp|Q8GVE1|CIGR2_ORYSJ;	Chitin-inducible gibberellin-responsive protein 2 OS=Oryza sativa subsp. japonica OX=39947 GN=CIGR2 PE=2 SV=1;	PF03514.16	GRAS	GRAS domain family
TraesCS2A02G389400	HB-other	2.99667	1.07333	-1.48126	down	Similar to Homeobox-leucine zipper protein HOX22 [Source: Projected from Oryza sativa (Os04g0541700)]	GO:0006355;GO:0006357;GO:0045893;GO:0005634;GO:0043565;GO:0003700;GO:0003677;GO:000098	BP:regulation of transcription, DNA-templated;BP:regulation of transcription from RNA polymerase II promoter;BP:positive regulation of transcription, DNA-templated;CC:nucleus;MF:sequence-specific DNA binding;MF:transcription factor activity, sequence-specific DNA binding;MF:DNA binding;MF:RNA polymerase II transcription factor activity, sequence-specific DNA binding;	------	------	------	------	ENOG410Z2UE	K:Transcription	KAF7002819.1	hypothetical protein CFC21_018244, partial [Triticum aestivum]	sp|Q01IK0|HOX22_ORYSI;	Homeobox-leucine zipper protein HOX22 OS=Oryza sativa subsp. indica OX=39946 GN=HOX22 PE=2 SV=2;	PF00046.31;PF02183.20;PF05920.13	Homeodomain;HALZ;Homeobox_KN	Homeodomain;Homeobox associated leucine zipper;Homeobox KN domain
TraesCS2D02G387300	HB-other	4.01333	1.09333	-1.87607	down	Similar to Homeobox-leucine zipper protein HOX22 [Source: Projected from Oryza sativa (Os04g0541700)]	GO:0006355;GO:0045893;GO:0005634;GO:0043565;GO:0003677;GO:000098	BP:regulation of transcription, DNA-templated;BP:positive regulation of transcription, DNA-templated;CC:nucleus;MF:sequence-specific DNA binding;MF:DNA binding;MF:RNA polymerase II transcription factor activity, sequence-specific DNA binding;	------	------	------	------	ENOG410Z2UE	K:Transcription	XP_020200397.1	homeobox-leucine zipper protein HOX22 [Aegilops tauschii subsp. strangulata]	sp|Q01IK0|HOX22_ORYSI;	Homeobox-leucine zipper protein HOX22 OS=Oryza sativa subsp. indica OX=39946 GN=HOX22 PE=2 SV=2;	PF00046.31;PF02183.20;PF05920.13	Homeodomain;HALZ;Homeobox_KN	Homeodomain;Homeobox associated leucine zipper;Homeobox KN domain
TraesCS2B02G407600	HB-other	0.776667	0.196667	-1.98154	down	Similar to Homeobox-leucine zipper protein HOX22 [Source: Projected from Oryza sativa (Os04g0541700)]	GO:0006355;GO:0005634;GO:0043565;GO:0003700;GO:0003677;GO:000098	BP:regulation of transcription, DNA-templated;CC:nucleus;MF:sequence-specific DNA binding;MF:transcription factor activity, sequence-specific DNA binding;MF:DNA binding;MF:RNA polymerase II transcription factor activity, sequence-specific DNA binding;	------	------	------	------	ENOG410Z2UE	K:Transcription	KAF7010242.1	hypothetical protein CFC21_024677 [Triticum aestivum]	sp|Q01IK0|HOX22_ORYSI;	Homeobox-leucine zipper protein HOX22 OS=Oryza sativa subsp. indica OX=39946 GN=HOX22 PE=2 SV=2;	PF00046.31;PF02183.20;PF05920.13	Homeodomain;HALZ;Homeobox_KN	Homeodomain;Homeobox associated leucine zipper;Homeobox KN domain
TraesCS6B02G284300	HB-other	0.853333	0.19	-2.16711	down	HOX1 [Source:UniProtKB/TrEMBL;Acc:M9PJT6]	GO:0006355;GO:0006357;GO:0045893;GO:0005634;GO:0043565;GO:0003700;GO:0003677;GO:000098	BP:regulation of transcription, DNA-templated;BP:regulation of transcription from RNA polymerase II promoter;BP:positive regulation of transcription, DNA-templated;CC:nucleus;MF:sequence-specific DNA binding;MF:transcription factor activity, sequence-specific DNA binding;MF:DNA binding;MF:RNA polymerase II transcription factor activity, sequence-specific DNA binding;	------	------	------	------	ENOG410Z2UE	K:Transcription	XP_037456291.1	homeobox-leucine zipper protein HOX24-like [Triticum dicoccoides]	sp|A2X7U1|HOX24_ORYSI;	Homeobox-leucine zipper protein HOX24 OS=Oryza sativa subsp. indica OX=39946 GN=HOX24 PE=2 SV=2;	PF00046.31;PF02183.20;PF05920.13;PF01025.21	Homeodomain;HALZ;Homeobox_KN;GrpE	Homeodomain;Homeobox associated leucine zipper;Homeobox KN domain;GrpE
TraesCS5B02G315600	HSF	21.4367	10.2967	-1.0579	down	Similar to Isoform 2 of Heat stress transcription factor B-2c [Source: Projected from Oryza sativa (Os09g0526600)]	GO:0006355;GO:0006357;GO:0016021;GO:0005634;GO:0043565;GO:0003700;GO:000097	BP:regulation of transcription, DNA-templated;BP:regulation of transcription from RNA polymerase II promoter;CC:integral component of membrane;CC:nucleus;MF:sequence-specific DNA binding;MF:transcription factor activity, sequence-specific DNA binding;MF:RNA polymerase II core promoter proximal region sequence-specific DNA binding;	K09419	HSFF	------	------	COG5169	K:Transcription	KAF7066786.1	hypothetical protein CFC21_072723 [Triticum aestivum]	sp|Q6Z9C8|HFB2B_ORYSJ;	Heat stress transcription factor B-2b OS=Oryza sativa subsp. japonica OX=39947 GN=HSFB2B PE=2 SV=1;	PF00447.19	HSF_DNA-bind	HSF-type DNA-binding
TraesCS5A02G383800	HSF	69.3233	7.44333	-3.21932	down	-	GO:0006355;GO:0006357;GO:0034605;GO:0005634;GO:0043565;GO:0003700;GO:000097	BP:regulation of transcription, DNA-templated;BP:regulation of transcription from RNA polymerase II promoter;BP:cellular response to heat;CC:nucleus;MF:sequence-specific DNA binding;MF:transcription factor activity, sequence-specific DNA binding;MF:RNA polymerase II core promoter proximal region sequence-specific DNA binding;	K09419	HSFF	------	------	COG5169	K:Transcription	VAI21795.1	unnamed protein product [Triticum turgidum subsp. durum]	sp|Q84MN7|HFA2A_ORYSJ;	Heat stress transcription factor A-2a OS=Oryza sativa subsp. japonica OX=39947 GN=HSFA2A PE=2 SV=1;	PF00447.19	HSF_DNA-bind	HSF-type DNA-binding
TraesCS5D02G393200	HSF	93.1667	9.16	-3.34639	down	-	GO:0006355;GO:0006357;GO:0034605;GO:0005634;GO:0043565;GO:0003700;GO:000097	BP:regulation of transcription, DNA-templated;BP:regulation of transcription from RNA polymerase II promoter;BP:cellular response to heat;CC:nucleus;MF:sequence-specific DNA binding;MF:transcription factor activity, sequence-specific DNA binding;MF:RNA polymerase II core promoter proximal region sequence-specific DNA binding;	K09419	HSFF	------	------	COG5169	K:Transcription	KAF7074617.1	hypothetical protein CFC21_079462 [Triticum aestivum]	sp|Q84MN7|HFA2A_ORYSJ;	Heat stress transcription factor A-2a OS=Oryza sativa subsp. japonica OX=39947 GN=HSFA2A PE=2 SV=1;	PF00447.19	HSF_DNA-bind	HSF-type DNA-binding
TraesCS5D02G445100	HSF	6.68	3.07	-1.12161	down	Heat stress transcriptioon factor, High-temperature stress tolerance, Tolerance to environmental stresse [Source: Projected from Oryza sativa (Os03g0795900)]	GO:0006355;GO:0006357;GO:0034605;GO:0005634;GO:0043565;GO:0003700;GO:000097	BP:regulation of transcription, DNA-templated;BP:regulation of transcription from RNA polymerase II promoter;BP:cellular response to heat;CC:nucleus;MF:sequence-specific DNA binding;MF:transcription factor activity, sequence-specific DNA binding;MF:RNA polymerase II core promoter proximal region sequence-specific DNA binding;	K09419	HSFF	------	------	COG5169	K:Transcription	QLI63287.1	heat shock transcription factor HsfA2-3 [Triticum aestivum]	sp|Q6F388|HFA2E_ORYSJ;	Heat stress transcription factor A-2e OS=Oryza sativa subsp. japonica OX=39947 GN=HSFA2E PE=2 SV=1;	PF00447.19	HSF_DNA-bind	HSF-type DNA-binding
TraesCS7D02G270600	HSF	9.33667	3.77667	-1.30579	down	-	GO:0006355;GO:0005634;GO:0003700;GO:004356	BP:regulation of transcription, DNA-templated;CC:nucleus;MF:transcription factor activity, sequence-specific DNA binding;MF:sequence-specific DNA binding;	K09419	HSFF	------	------	COG5169	K:Transcription	XP_040251789.1	heat stress transcription factor B-2b, partial [Aegilops tauschii subsp. strangulata]	sp|Q6Z9C8|HFB2B_ORYSJ;	Heat stress transcription factor B-2b OS=Oryza sativa subsp. japonica OX=39947 GN=HSFB2B PE=2 SV=1;	PF00447.19	HSF_DNA-bind	HSF-type DNA-binding
TraesCS7A02G270100	HSF	9.44333	2.66667	-1.82426	down	Heat-responsive transcription factor [Source:UniProtKB/TrEMBL;Acc:A0A0D3QT57]	GO:0006355;GO:0006357;GO:0005634;GO:0043565;GO:0003700;GO:0003677;GO:000097	BP:regulation of transcription, DNA-templated;BP:regulation of transcription from RNA polymerase II promoter;CC:nucleus;MF:sequence-specific DNA binding;MF:transcription factor activity, sequence-specific DNA binding;MF:DNA binding;MF:RNA polymerase II core promoter proximal region sequence-specific DNA binding;	K09419	HSFF	------	------	COG5169	K:Transcription	XP_040251789.1	heat stress transcription factor B-2b, partial [Aegilops tauschii subsp. strangulata]	sp|Q6Z9C8|HFB2B_ORYSJ;	Heat stress transcription factor B-2b OS=Oryza sativa subsp. japonica OX=39947 GN=HSFB2B PE=2 SV=1;	PF00447.19	HSF_DNA-bind	HSF-type DNA-binding
TraesCS5B02G236400	HSF	7.67	2.15667	-1.83042	down	Similar to Heat stress transcription factor Spl7 (Heat shock transcription factor) (Heat shock factor RHSF10) [Source: Projected from Oryza sativa (Os09g0456800)]	GO:0006355;GO:0006357;GO:0045892;GO:0009408;GO:0005737;GO:0005634;GO:0043565;GO:0003700;GO:0003677;GO:000097	BP:regulation of transcription, DNA-templated;BP:regulation of transcription from RNA polymerase II promoter;BP:negative regulation of transcription, DNA-templated;BP:response to heat;CC:cytoplasm;CC:nucleus;MF:sequence-specific DNA binding;MF:transcription factor activity, sequence-specific DNA binding;MF:DNA binding;MF:RNA polymerase II core promoter proximal region sequence-specific DNA bindin…	K09419	HSFF	------	------	COG5169	K:Transcription	KAF7065834.1	hypothetical protein CFC21_071904 [Triticum aestivum]	sp|Q67TP9|HSFB1_ORYSJ;	Heat stress transcription factor B-1 OS=Oryza sativa subsp. japonica OX=39947 GN=HSFB1 PE=2 SV=1;	PF00447.19	HSF_DNA-bind	HSF-type DNA-binding
TraesCS4B02G278100	HSF	10.9533	2.95333	-1.89095	down	-	GO:0006355;GO:0006357;GO:0009086;GO:0034605;GO:0005634;GO:0043565;GO:0010309;GO:0003700;GO:000097	BP:regulation of transcription, DNA-templated;BP:regulation of transcription from RNA polymerase II promoter;BP:methionine biosynthetic process;BP:cellular response to heat;CC:nucleus;MF:sequence-specific DNA binding;MF:acireductone dioxygenase [iro;MF:transcription factor activity, sequence-specific DNA binding;MF:RNA polymerase II core promoter proximal region sequence-specific DNA binding;	K09419;K08967	HSFF;mtnD, mtnZ, ADI1	map00270	Cysteine and methionine metabolism	COG5169;COG1791	K:Transcription;S:Function unknown	XP_037427414.1	uncharacterized protein LOC119292822 [Triticum dicoccoides]	sp|Q8H7Y6|HFA2D_ORYSJ;	Heat stress transcription factor A-2d OS=Oryza sativa subsp. japonica OX=39947 GN=HSFA2D PE=2 SV=2;	PF00447.19	HSF_DNA-bind	HSF-type DNA-binding
TraesCS7B02G168300	HSF	13.6167	3.59667	-1.92064	down	-	GO:0006355;GO:0005634;GO:0003700;GO:004356	BP:regulation of transcription, DNA-templated;CC:nucleus;MF:transcription factor activity, sequence-specific DNA binding;MF:sequence-specific DNA binding;	K09419	HSFF	------	------	COG5169	K:Transcription	XP_040251789.1	heat stress transcription factor B-2b, partial [Aegilops tauschii subsp. strangulata]	sp|Q6Z9C8|HFB2B_ORYSJ;	Heat stress transcription factor B-2b OS=Oryza sativa subsp. japonica OX=39947 GN=HSFB2B PE=2 SV=1;	PF00447.19	HSF_DNA-bind	HSF-type DNA-binding
TraesCS4A02G027700	HSF	8.16	2.11667	-1.94677	down	-	GO:0006355;GO:0006357;GO:0009086;GO:0034605;GO:0005634;GO:0043565;GO:0010309;GO:0003700;GO:0003677;GO:000097	BP:regulation of transcription, DNA-templated;BP:regulation of transcription from RNA polymerase II promoter;BP:methionine biosynthetic process;BP:cellular response to heat;CC:nucleus;MF:sequence-specific DNA binding;MF:acireductone dioxygenase [iro;MF:transcription factor activity, sequence-specific DNA binding;MF:DNA binding;MF:RNA polymerase II core promoter proximal region sequence-specific D…	K09419;K08967	HSFF;mtnD, mtnZ, ADI1	map00270	Cysteine and methionine metabolism	COG5169;COG1791	K:Transcription;S:Function unknown	XP_037418839.1	uncharacterized protein LOC119283368 [Triticum dicoccoides]	sp|Q8H7Y6|HFA2D_ORYSJ;	Heat stress transcription factor A-2d OS=Oryza sativa subsp. japonica OX=39947 GN=HSFA2D PE=2 SV=2;	PF00447.19	HSF_DNA-bind	HSF-type DNA-binding
TraesCS5A02G237900	HSF	25.4067	6.05667	-2.06861	down	Similar to Heat stress transcription factor Spl7 (Heat shock transcription factor) (Heat shock factor RHSF10) [Source: Projected from Oryza sativa (Os09g0456800)]	GO:0006355;GO:0006357;GO:0045892;GO:0009408;GO:0005737;GO:0005634;GO:0043565;GO:0003700;GO:000097	BP:regulation of transcription, DNA-templated;BP:regulation of transcription from RNA polymerase II promoter;BP:negative regulation of transcription, DNA-templated;BP:response to heat;CC:cytoplasm;CC:nucleus;MF:sequence-specific DNA binding;MF:transcription factor activity, sequence-specific DNA binding;MF:RNA polymerase II core promoter proximal region sequence-specific DNA binding;	K09419	HSFF	------	------	COG5169	K:Transcription	XP_037434695.1	heat stress transcription factor B-1-like [Triticum dicoccoides]	sp|Q67TP9|HSFB1_ORYSJ;	Heat stress transcription factor B-1 OS=Oryza sativa subsp. japonica OX=39947 GN=HSFB1 PE=2 SV=1;	PF00447.19	HSF_DNA-bind	HSF-type DNA-binding
TraesCS2B02G419600	HSF	12.29	2.79	-2.13915	down	Similar to Heat stress transcription factor Spl7 (Heat shock transcription factor) (Heat shock factor RHSF10) [Source: Projected from Oryza sativa (Os04g0568700)]	GO:0006355;GO:0006357;GO:0005737;GO:0005634;GO:0043565;GO:0003700;GO:000097	BP:regulation of transcription, DNA-templated;BP:regulation of transcription from RNA polymerase II promoter;CC:cytoplasm;CC:nucleus;MF:sequence-specific DNA binding;MF:transcription factor activity, sequence-specific DNA binding;MF:RNA polymerase II core promoter proximal region sequence-specific DNA binding;	K09419	HSFF	------	------	COG5169	K:Transcription	XP_037486682.1	heat stress transcription factor B-2a-like [Triticum dicoccoides]	sp|Q7XRX3|HFB2A_ORYSJ;	Heat stress transcription factor B-2a OS=Oryza sativa subsp. japonica OX=39947 GN=HSFB2A PE=2 SV=2;	PF00447.19	HSF_DNA-bind	HSF-type DNA-binding
TraesCS5D02G244800	HSF	10.4467	2.21667	-2.23658	down	Similar to Heat stress transcription factor Spl7 (Heat shock transcription factor) (Heat shock factor RHSF10) [Source: Projected from Oryza sativa (Os09g0456800)]	GO:0006355;GO:0006357;GO:0045892;GO:0009408;GO:0005737;GO:0005634;GO:0043565;GO:0003700;GO:000097	BP:regulation of transcription, DNA-templated;BP:regulation of transcription from RNA polymerase II promoter;BP:negative regulation of transcription, DNA-templated;BP:response to heat;CC:cytoplasm;CC:nucleus;MF:sequence-specific DNA binding;MF:transcription factor activity, sequence-specific DNA binding;MF:RNA polymerase II core promoter proximal region sequence-specific DNA binding;	K09419	HSFF	------	------	COG5169	K:Transcription	XP_020177659.1	heat stress transcription factor B-1 [Aegilops tauschii subsp. strangulata]	sp|Q67TP9|HSFB1_ORYSJ;	Heat stress transcription factor B-1 OS=Oryza sativa subsp. japonica OX=39947 GN=HSFB1 PE=2 SV=1;	PF00447.19	HSF_DNA-bind	HSF-type DNA-binding
TraesCS2A02G401600	HSF	8.56333	1.81667	-2.23688	down	Similar to Heat stress transcription factor Spl7 (Heat shock transcription factor) (Heat shock factor RHSF10) [Source: Projected from Oryza sativa (Os04g0568700)]	GO:0006355;GO:0006357;GO:0005737;GO:0005634;GO:0043565;GO:0003700;GO:000097	BP:regulation of transcription, DNA-templated;BP:regulation of transcription from RNA polymerase II promoter;CC:cytoplasm;CC:nucleus;MF:sequence-specific DNA binding;MF:transcription factor activity, sequence-specific DNA binding;MF:RNA polymerase II core promoter proximal region sequence-specific DNA binding;	K09419	HSFF	------	------	COG5169	K:Transcription	KAF7002958.1	hypothetical protein CFC21_018357 [Triticum aestivum]	sp|Q7XRX3|HFB2A_ORYSJ;	Heat stress transcription factor B-2a OS=Oryza sativa subsp. japonica OX=39947 GN=HSFB2A PE=2 SV=2;	PF00447.19	HSF_DNA-bind	HSF-type DNA-binding
TraesCS2D02G399000	HSF	8.52333	1.72333	-2.30622	down	Similar to Heat stress transcription factor Spl7 (Heat shock transcription factor) (Heat shock factor RHSF10) [Source: Projected from Oryza sativa (Os04g0568700)]	GO:0006355;GO:0006357;GO:0005737;GO:0005634;GO:0043565;GO:0003700;GO:0003677;GO:000097	BP:regulation of transcription, DNA-templated;BP:regulation of transcription from RNA polymerase II promoter;CC:cytoplasm;CC:nucleus;MF:sequence-specific DNA binding;MF:transcription factor activity, sequence-specific DNA binding;MF:DNA binding;MF:RNA polymerase II core promoter proximal region sequence-specific DNA binding;	K09419	HSFF	------	------	COG5169	K:Transcription	XP_020152813.1	heat stress transcription factor B-2a [Aegilops tauschii subsp. strangulata]	sp|Q7XRX3|HFB2A_ORYSJ;	Heat stress transcription factor B-2a OS=Oryza sativa subsp. japonica OX=39947 GN=HSFB2A PE=2 SV=2;	PF00447.19	HSF_DNA-bind	HSF-type DNA-binding
TraesCS1A02G375600	HSF	62.4733	12.4	-2.3329	down	Heat shock transcription factor A6e [Source:UniProtKB/TrEMBL;Acc:W4ZRM4]	GO:0006355;GO:0006357;GO:0034605;GO:0005634;GO:0043565;GO:0003700;GO:0003677;GO:0000978;GO:004280	BP:regulation of transcription, DNA-templated;BP:regulation of transcription from RNA polymerase II promoter;BP:cellular response to heat;CC:nucleus;MF:sequence-specific DNA binding;MF:transcription factor activity, sequence-specific DNA binding;MF:DNA binding;MF:RNA polymerase II core promoter proximal region sequence-specific DNA binding;MF:identical protein binding;	K09419;K08967	HSFF;mtnD, mtnZ, ADI1	map00270	Cysteine and methionine metabolism	COG5169	K:Transcription	XP_037425119.1	heat stress transcription factor A-2c-like [Triticum dicoccoides]	sp|Q338B0|HFA2C_ORYSJ;	Heat stress transcription factor A-2c OS=Oryza sativa subsp. japonica OX=39947 GN=HSFA2C PE=1 SV=2;	PF00447.19	HSF_DNA-bind	HSF-type DNA-binding
TraesCS1D02G382900	HSF	53.68	10.6367	-2.33534	down	-	GO:0006355;GO:0006357;GO:0034605;GO:0005634;GO:0043565;GO:0003700;GO:0000978;GO:004280	BP:regulation of transcription, DNA-templated;BP:regulation of transcription from RNA polymerase II promoter;BP:cellular response to heat;CC:nucleus;MF:sequence-specific DNA binding;MF:transcription factor activity, sequence-specific DNA binding;MF:RNA polymerase II core promoter proximal region sequence-specific DNA binding;MF:identical protein binding;	K09419;K08967	HSFF;mtnD, mtnZ, ADI1	map00270	Cysteine and methionine metabolism	COG5169	K:Transcription	KAF6997318.1	hypothetical protein CFC21_013553 [Triticum aestivum]	sp|Q338B0|HFA2C_ORYSJ;	Heat stress transcription factor A-2c OS=Oryza sativa subsp. japonica OX=39947 GN=HSFA2C PE=1 SV=2;	PF00447.19	HSF_DNA-bind	HSF-type DNA-binding
TraesCS1B02G396000	HSF	62.0833	11.2633	-2.46257	down	-	GO:0006355;GO:0006357;GO:0034605;GO:0005634;GO:0043565;GO:0003700;GO:0000978;GO:004280	BP:regulation of transcription, DNA-templated;BP:regulation of transcription from RNA polymerase II promoter;BP:cellular response to heat;CC:nucleus;MF:sequence-specific DNA binding;MF:transcription factor activity, sequence-specific DNA binding;MF:RNA polymerase II core promoter proximal region sequence-specific DNA binding;MF:identical protein binding;	K09419;K08967	HSFF;mtnD, mtnZ, ADI1	map00270	Cysteine and methionine metabolism	COG5169	K:Transcription	KAF6991613.1	hypothetical protein CFC21_008682 [Triticum aestivum]	sp|Q338B0|HFA2C_ORYSJ;	Heat stress transcription factor A-2c OS=Oryza sativa subsp. japonica OX=39947 GN=HSFA2C PE=1 SV=2;	PF00447.19	HSF_DNA-bind	HSF-type DNA-binding
TraesCS4D02G276500	HSF	7.96667	2.36667	-1.75112	down	-	GO:0006355;GO:0006357;GO:0009086;GO:0034605;GO:0005634;GO:0043565;GO:0010309;GO:0003700;GO:000097	BP:regulation of transcription, DNA-templated;BP:regulation of transcription from RNA polymerase II promoter;BP:methionine biosynthetic process;BP:cellular response to heat;CC:nucleus;MF:sequence-specific DNA binding;MF:acireductone dioxygenase [iro;MF:transcription factor activity, sequence-specific DNA binding;MF:RNA polymerase II core promoter proximal region sequence-specific DNA binding;	K09419;K08967	HSFF;mtnD, mtnZ, ADI1	map00270	Cysteine and methionine metabolism	COG5169;COG1791	K:Transcription;S:Function unknown	XP_037427414.1	uncharacterized protein LOC119292822 [Triticum dicoccoides]	sp|Q8H7Y6|HFA2D_ORYSJ;	Heat stress transcription factor A-2d OS=Oryza sativa subsp. japonica OX=39947 GN=HSFA2D PE=2 SV=2;	PF00447.19;PF17675.3	HSF_DNA-bind;APG6_N	HSF-type DNA-binding;Apg6 coiled-coil region
TraesCS3A02G434900	M_type	1.89667	0.713333	-1.41082	down	-	GO:0006357;GO:0045944;GO:0006351;GO:0005634;GO:0003677;GO:0046983;GO:0000978;GO:0000981;GO:000097	BP:regulation of transcription from RNA polymerase II promoter;BP:positive regulation of transcription from RNA polymerase II promoter;BP:transcription, DNA-templated;CC:nucleus;MF:DNA binding;MF:protein dimerization activity;MF:RNA polymerase II core promoter proximal region sequence-specific DNA binding;MF:RNA polymerase II transcription factor activity, sequence-specific DNA binding;MF:RNA pol…	------	------	------	------	COG5068	K:Transcription	XP_037407998.1	MADS-box transcription factor 51-like [Triticum dicoccoides]	sp|Q9XJ61|MAD51_ORYSJ;	MADS-box transcription factor 51 OS=Oryza sativa subsp. japonica OX=39947 GN=MADS51 PE=2 SV=1;	PF00319.20	SRF-TF	SRF-type transcription factor
TraesCS6D02G273500	M_type	115.017	38.0567	-1.59562	down	-	GO:0006355;GO:0006357;GO:0045944;GO:0006351;GO:0005634;GO:0003700;GO:0003677;GO:0046983;GO:0000978;GO:0000981;GO:000097	BP:regulation of transcription, DNA-templated;BP:regulation of transcription from RNA polymerase II promoter;BP:positive regulation of transcription from RNA polymerase II promoter;BP:transcription, DNA-templated;CC:nucleus;MF:transcription factor activity, sequence-specific DNA binding;MF:DNA binding;MF:protein dimerization activity;MF:RNA polymerase II core promoter proximal region sequence-spe…	K09264	K09264	------	------	COG5068	K:Transcription	KAF7090844.1	hypothetical protein CFC21_093533 [Triticum aestivum]	sp|Q6Z6W2|MAD57_ORYSJ;	MADS-box transcription factor 57 OS=Oryza sativa subsp. japonica OX=39947 GN=MADS57 PE=1 SV=2;	PF00319.20;PF01486.19	SRF-TF;K-box	SRF-type transcription factor;K-box region
TraesCS6B02G322700	M_type	87.85	28.4367	-1.62729	down	-	GO:0006355;GO:0006357;GO:0045944;GO:0006351;GO:0005634;GO:0003700;GO:0003677;GO:0046983;GO:0000978;GO:0000981;GO:000097	BP:regulation of transcription, DNA-templated;BP:regulation of transcription from RNA polymerase II promoter;BP:positive regulation of transcription from RNA polymerase II promoter;BP:transcription, DNA-templated;CC:nucleus;MF:transcription factor activity, sequence-specific DNA binding;MF:DNA binding;MF:protein dimerization activity;MF:RNA polymerase II core promoter proximal region sequence-spe…	K09264	K09264	------	------	COG5068	K:Transcription	KAF7085706.1	hypothetical protein CFC21_089104 [Triticum aestivum]	sp|Q6Z6W2|MAD57_ORYSJ;	MADS-box transcription factor 57 OS=Oryza sativa subsp. japonica OX=39947 GN=MADS57 PE=1 SV=2;	PF00319.20;PF01486.19	SRF-TF;K-box	SRF-type transcription factor;K-box region
TraesCS6A02G292300	M_type	43.8367	11.95	-1.87513	down	-	GO:0040008;GO:0006355;GO:0006357;GO:0045944;GO:0006351;GO:0005634;GO:0003700;GO:0003677;GO:0046983;GO:0000978;GO:0000981;GO:000097	BP:regulation of growth;BP:regulation of transcription, DNA-templated;BP:regulation of transcription from RNA polymerase II promoter;BP:positive regulation of transcription from RNA polymerase II promoter;BP:transcription, DNA-templated;CC:nucleus;MF:transcription factor activity, sequence-specific DNA binding;MF:DNA binding;MF:protein dimerization activity;MF:RNA polymerase II core promoter prox…	K09264	K09264	------	------	COG5068	K:Transcription	XP_037448149.1	MADS-box transcription factor 57-like isoform X2 [Triticum dicoccoides]	sp|Q6Z6W2|MAD57_ORYSJ;	MADS-box transcription factor 57 OS=Oryza sativa subsp. japonica OX=39947 GN=MADS57 PE=1 SV=2;	PF00319.20;PF01486.19	SRF-TF;K-box	SRF-type transcription factor;K-box region
TraesCS3B02G286500	MYB	0.736667	1.81333	1.29956	up	-	GO:0010119;GO:000367	BP:regulation of stomatal movement;MF:DNA binding;	K09422	MYBP	------	------	COG5147	K:Transcription	XP_037413648.1	myb-related protein Hv33-like [Triticum dicoccoides]	sp|P20027|MYB3_HORVU;	Myb-related protein Hv33 OS=Hordeum vulgare OX=4513 GN=MYB2 PE=2 SV=3;	PF00249.33;PF13921.8	Myb_DNA-binding;Myb_DNA-bind_6	Myb-like DNA-binding domain;Myb-like DNA-binding domain
TraesCS6B02G257200	MYB	3.10333	1.52667	-1.02343	down	-	GO:000367	MF:DNA binding;	K09422	MYBP	------	------	COG5147	K:Transcription	XP_037456296.1	transcription factor MYB30-like [Triticum dicoccoides]	sp|Q6K1S6|MYB30_ORYSJ;	Transcription factor MYB30 OS=Oryza sativa subsp. japonica OX=39947 GN=MYB30 PE=1 SV=1;	PF00249.33;PF13921.8	Myb_DNA-binding;Myb_DNA-bind_6	Myb-like DNA-binding domain;Myb-like DNA-binding domain
TraesCS6D02G210500	MYB	3.70667	1.8	-1.04213	down	-	------	------	K09422	MYBP	------	------	COG5147	K:Transcription	XP_020198196.1	transcription factor MYB30 [Aegilops tauschii subsp. strangulata]	sp|Q6K1S6|MYB30_ORYSJ;	Transcription factor MYB30 OS=Oryza sativa subsp. japonica OX=39947 GN=MYB30 PE=1 SV=1;	PF00249.33;PF13921.8	Myb_DNA-binding;Myb_DNA-bind_6	Myb-like DNA-binding domain;Myb-like DNA-binding domain
TraesCS6A02G261100	MYB	1.17333	0.566667	-1.05004	down	-	GO:0005634;GO:000367	CC:nucleus;MF:DNA binding;	------	------	------	------	ENOG4111X77	K:Transcription	XP_037447811.1	protein REVEILLE 1-like isoform X2 [Triticum dicoccoides]	sp|F4KGY6|RVE1_ARATH;	Protein REVEILLE 1 OS=Arabidopsis thaliana OX=3702 GN=RVE1 PE=1 SV=1;	PF00249.33;PF13921.8	Myb_DNA-binding;Myb_DNA-bind_6	Myb-like DNA-binding domain;Myb-like DNA-binding domain
TraesCS2A02G447100	MYB	1.81667	0.876667	-1.05119	down	-	GO:000367	MF:DNA binding;	K09422	MYBP	------	------	------	------	KAF7003533.1	hypothetical protein CFC21_018831 [Triticum aestivum]	sp|Q9S9Z2|MYB93_ARATH;	Transcription factor MYB93 OS=Arabidopsis thaliana OX=3702 GN=MYB93 PE=1 SV=1;	PF00249.33;PF13921.8	Myb_DNA-binding;Myb_DNA-bind_6	Myb-like DNA-binding domain;Myb-like DNA-binding domain
TraesCS6B02G257100	MYB	4.09667	1.95333	-1.06851	down	-	------	------	K09422	MYBP	------	------	COG5147	K:Transcription	KAF7084950.1	hypothetical protein CFC21_088455 [Triticum aestivum]	sp|Q6K1S6|MYB30_ORYSJ;	Transcription factor MYB30 OS=Oryza sativa subsp. japonica OX=39947 GN=MYB30 PE=1 SV=1;	PF00249.33;PF13921.8	Myb_DNA-binding;Myb_DNA-bind_6	Myb-like DNA-binding domain;Myb-like DNA-binding domain
TraesCS6D02G211400	MYB	2.67333	1.27333	-1.07003	down	MYB73 [Source:UniProtKB/TrEMBL;Acc:G9JVI1]	GO:000367	MF:DNA binding;	K09422	MYBP	------	------	COG5147	K:Transcription	XP_020169006.1	transcription factor MYB30 [Aegilops tauschii subsp. strangulata]	sp|Q6K1S6|MYB30_ORYSJ;	Transcription factor MYB30 OS=Oryza sativa subsp. japonica OX=39947 GN=MYB30 PE=1 SV=1;	PF00249.33;PF13921.8	Myb_DNA-binding;Myb_DNA-bind_6	Myb-like DNA-binding domain;Myb-like DNA-binding domain
TraesCS2A02G447200	MYB	1.21	0.243333	-2.314	down	-	GO:000367	MF:DNA binding;	K09422	MYBP	------	------	------	------	KAF7003534.1	hypothetical protein CFC21_018832 [Triticum aestivum]	sp|Q8GWP0|MYB39_ARATH;	Transcription factor MYB39 OS=Arabidopsis thaliana OX=3702 GN=MYB39 PE=1 SV=1;	PF00249.33;PF13921.8	Myb_DNA-binding;Myb_DNA-bind_6	Myb-like DNA-binding domain;Myb-like DNA-binding domain
TraesCS6D02G210900	MYB	0.673333	0.066667	-3.33628	down	-	GO:000367	MF:DNA binding;	K09422	MYBP	------	------	COG5147	K:Transcription	XP_020182109.1	transcription factor MYB30-like [Aegilops tauschii subsp. strangulata]	sp|Q6K1S6|MYB30_ORYSJ;	Transcription factor MYB30 OS=Oryza sativa subsp. japonica OX=39947 GN=MYB30 PE=1 SV=1;	PF00249.33;PF13921.8	Myb_DNA-binding;Myb_DNA-bind_6	Myb-like DNA-binding domain;Myb-like DNA-binding domain
TraesCS7D02G295400	MYB	50.7133	23.4467	-1.11298	down	-	GO:0005634;GO:000367	CC:nucleus;MF:DNA binding;	K12133	LHY	map04712	Circadian rhythm - plant	ENOG4111X77	K:Transcription	KAF7109084.1	hypothetical protein CFC21_109398 [Triticum aestivum]	sp|A0A0G3VTN5|LHY_PETHY;	Protein LATE ELONGATED HYPOCOTYL OS=Petunia hybrida OX=4102 GN=LHY PE=2 SV=1;	PF00249.33	Myb_DNA-binding	Myb-like DNA-binding domain
TraesCS2D02G446100	MYB	2.41333	1.10333	-1.12916	down	-	GO:000367	MF:DNA binding;	K09422	MYBP	------	------	------	------	KAF7018273.1	hypothetical protein CFC21_031573 [Triticum aestivum]	sp|Q9LDR8|MY102_ARATH;	Transcription factor MYB102 OS=Arabidopsis thaliana OX=3702 GN=MYB102 PE=2 SV=1;	PF00249.33;PF13921.8	Myb_DNA-binding;Myb_DNA-bind_6	Myb-like DNA-binding domain;Myb-like DNA-binding domain
TraesCS6B02G257300	MYB	4.67667	2.04	-1.19691	down	-	GO:000367	MF:DNA binding;	K09422	MYBP	------	------	COG5147	K:Transcription	KAF7084952.1	hypothetical protein CFC21_088457 [Triticum aestivum]	sp|Q6K1S6|MYB30_ORYSJ;	Transcription factor MYB30 OS=Oryza sativa subsp. japonica OX=39947 GN=MYB30 PE=1 SV=1;	PF00249.33;PF13921.8	Myb_DNA-binding;Myb_DNA-bind_6	Myb-like DNA-binding domain;Myb-like DNA-binding domain
TraesCS6A02G224000	MYB	2.74	1.19	-1.20321	down	-	GO:000367	MF:DNA binding;	K09422	MYBP	------	------	COG5147	K:Transcription	XP_037447475.1	transcription factor MYB30-like [Triticum dicoccoides]	sp|Q6K1S6|MYB30_ORYSJ;	Transcription factor MYB30 OS=Oryza sativa subsp. japonica OX=39947 GN=MYB30 PE=1 SV=1;	PF00249.33;PF13921.8	Myb_DNA-binding;Myb_DNA-bind_6	Myb-like DNA-binding domain;Myb-like DNA-binding domain
TraesCS6D02G211100	MYB	3.39667	1.44667	-1.23139	down	-	GO:000367	MF:DNA binding;	K09422	MYBP	------	------	COG5147	K:Transcription	KAF7090073.1	hypothetical protein CFC21_092891 [Triticum aestivum]	sp|Q6K1S6|MYB30_ORYSJ;	Transcription factor MYB30 OS=Oryza sativa subsp. japonica OX=39947 GN=MYB30 PE=1 SV=1;	PF00249.33;PF13921.8	Myb_DNA-binding;Myb_DNA-bind_6	Myb-like DNA-binding domain;Myb-like DNA-binding domain
TraesCS6A02G224400	MYB	4.59667	1.90667	-1.26954	down	MYB33 [Source:UniProtKB/TrEMBL;Acc:G3LZX9]	GO:000367	MF:DNA binding;	K09422	MYBP	------	------	COG5147	K:Transcription	XP_037447472.1	transcription factor MYB30-like [Triticum dicoccoides]	sp|Q6K1S6|MYB30_ORYSJ;	Transcription factor MYB30 OS=Oryza sativa subsp. japonica OX=39947 GN=MYB30 PE=1 SV=1;	PF00249.33;PF13921.8	Myb_DNA-binding;Myb_DNA-bind_6	Myb-like DNA-binding domain;Myb-like DNA-binding domain
TraesCS6D02G241900	MYB	0.913333	0.363333	-1.32985	down	-	GO:0005634;GO:000367	CC:nucleus;MF:DNA binding;	------	------	------	------	ENOG4111X77	K:Transcription	XP_020193937.1	protein REVEILLE 1 [Aegilops tauschii subsp. strangulata]	sp|F4KGY6|RVE1_ARATH;	Protein REVEILLE 1 OS=Arabidopsis thaliana OX=3702 GN=RVE1 PE=1 SV=1;	PF00249.33;PF13921.8	Myb_DNA-binding;Myb_DNA-bind_6	Myb-like DNA-binding domain;Myb-like DNA-binding domain
TraesCS7A02G553800	MYB	36.6933	14.0667	-1.38324	down	-	GO:0005634;GO:000367	CC:nucleus;MF:DNA binding;	------	------	------	------	ENOG4111HV1	K:Transcription	XP_037460342.1	protein LHY-like isoform X1 [Triticum dicoccoides]	sp|F4K5X6|RVE2_ARATH;	Protein REVEILLE 2 OS=Arabidopsis thaliana OX=3702 GN=RVE2 PE=1 SV=1;	PF00249.33;PF13921.8	Myb_DNA-binding;Myb_DNA-bind_6	Myb-like DNA-binding domain;Myb-like DNA-binding domain
TraesCS6B02G257000	MYB	4.88333	1.85	-1.40034	down	Myb33 [Source:UniProtKB/TrEMBL;Acc:A0A182BBB2]	GO:000367	MF:DNA binding;	K09422	MYBP	------	------	COG5147	K:Transcription	XP_037450124.1	transcription factor MYB30-like [Triticum dicoccoides]	sp|Q6K1S6|MYB30_ORYSJ;	Transcription factor MYB30 OS=Oryza sativa subsp. japonica OX=39947 GN=MYB30 PE=1 SV=1;	PF00249.33;PF13921.8	Myb_DNA-binding;Myb_DNA-bind_6	Myb-like DNA-binding domain;Myb-like DNA-binding domain
TraesCS2D02G446300	MYB	1.67667	0.63	-1.41217	down	-	GO:000367	MF:DNA binding;	K09422	MYBP	------	------	------	------	KAF7018275.1	hypothetical protein CFC21_031575 [Triticum aestivum]	sp|Q9S9Z2|MYB93_ARATH;	Transcription factor MYB93 OS=Arabidopsis thaliana OX=3702 GN=MYB93 PE=1 SV=1;	PF00249.33;PF13921.8	Myb_DNA-binding;Myb_DNA-bind_6	Myb-like DNA-binding domain;Myb-like DNA-binding domain
TraesCS2D02G445900	MYB	1.45	0.536667	-1.43395	down	-	GO:000367	MF:DNA binding;	K09422	MYBP	------	------	------	------	XP_020169252.1	transcription factor MYB41-like [Aegilops tauschii subsp. strangulata]	sp|Q8GWP0|MYB39_ARATH;	Transcription factor MYB39 OS=Arabidopsis thaliana OX=3702 GN=MYB39 PE=1 SV=1;	PF00249.33;PF13921.8	Myb_DNA-binding;Myb_DNA-bind_6	Myb-like DNA-binding domain;Myb-like DNA-binding domain
TraesCS6A02G224200	MYB	4.15667	1.36667	-1.60477	down	-	GO:000367	MF:DNA binding;	K09422	MYBP	------	------	COG5147	K:Transcription	KAF7079432.1	hypothetical protein CFC21_083663 [Triticum aestivum]	sp|Q6K1S6|MYB30_ORYSJ;	Transcription factor MYB30 OS=Oryza sativa subsp. japonica OX=39947 GN=MYB30 PE=1 SV=1;	PF00249.33;PF13921.8	Myb_DNA-binding;Myb_DNA-bind_6	Myb-like DNA-binding domain;Myb-like DNA-binding domain
TraesCS6A02G224300	MYB	2.85	0.933333	-1.6105	down	MYB transcription factor SM155-1 [Source:UniProtKB/TrEMBL;Acc:W5G730]	GO:000367	MF:DNA binding;	K09422	MYBP	------	------	COG5147	K:Transcription	XP_037449667.1	transcription factor MYB30-like [Triticum dicoccoides]	sp|Q6K1S6|MYB30_ORYSJ;	Transcription factor MYB30 OS=Oryza sativa subsp. japonica OX=39947 GN=MYB30 PE=1 SV=1;	PF00249.33;PF13921.8	Myb_DNA-binding;Myb_DNA-bind_6	Myb-like DNA-binding domain;Myb-like DNA-binding domain
TraesCS3D02G413700	MYB	1.4	0.453333	-1.62678	down	-	GO:0006355;GO:0005634;GO:0003700;GO:0043565;GO:000367	BP:regulation of transcription, DNA-templated;CC:nucleus;MF:transcription factor activity, sequence-specific DNA binding;MF:sequence-specific DNA binding;MF:DNA binding;	K09422	MYBP	------	------	COG5147	K:Transcription	KAF7039323.1	hypothetical protein CFC21_049339 [Triticum aestivum]	sp|Q10MB4|MYB2_ORYSJ;	Transcription factor MYB2 OS=Oryza sativa subsp. japonica OX=39947 GN=MYB2 PE=2 SV=1;	PF00249.33;PF13921.8	Myb_DNA-binding;Myb_DNA-bind_6	Myb-like DNA-binding domain;Myb-like DNA-binding domain
TraesCS6B02G288500	MYB	1.17	0.3	-1.96347	down	MYB-related protein [Source:UniProtKB/TrEMBL;Acc:G9DRA4]	GO:0005634;GO:000367	CC:nucleus;MF:DNA binding;	------	------	------	------	ENOG4111X77	K:Transcription	XP_037452656.1	protein REVEILLE 1-like [Triticum dicoccoides]	sp|F4KGY6|RVE1_ARATH;	Protein REVEILLE 1 OS=Arabidopsis thaliana OX=3702 GN=RVE1 PE=1 SV=1;	PF00249.33;PF13921.8	Myb_DNA-binding;Myb_DNA-bind_6	Myb-like DNA-binding domain;Myb-like DNA-binding domain
TraesCS2A02G447400	MYB	0.873333	0.22	-1.98903	down	-	GO:000367	MF:DNA binding;	K09422	MYBP	------	------	------	------	KAF7003536.1	hypothetical protein CFC21_018834 [Triticum aestivum]	sp|Q8GWP0|MYB39_ARATH;	Transcription factor MYB39 OS=Arabidopsis thaliana OX=3702 GN=MYB39 PE=1 SV=1;	PF00249.33;PF13921.8	Myb_DNA-binding;Myb_DNA-bind_6	Myb-like DNA-binding domain;Myb-like DNA-binding domain
TraesCS7B02G478200	MYB	32.76	14.2267	-1.20334	down	-	GO:0005634;GO:000367	CC:nucleus;MF:DNA binding;	------	------	------	------	ENOG4111HV1	K:Transcription	KAF7105202.1	hypothetical protein CFC21_106034 [Triticum aestivum]	sp|F4K5X6|RVE2_ARATH;	Protein REVEILLE 2 OS=Arabidopsis thaliana OX=3702 GN=RVE2 PE=1 SV=1;	PF00249.33;PF13921.8;PF15963.7	Myb_DNA-binding;Myb_DNA-bind_6;Myb_DNA-bind_7	Myb-like DNA-binding domain;Myb-like DNA-binding domain;Myb DNA-binding like
TraesCS7D02G540700	MYB	36.11	13.9733	-1.36972	down	-	GO:0005634;GO:000367	CC:nucleus;MF:DNA binding;	------	------	------	------	ENOG4111HV1	K:Transcription	XP_020180978.1	protein LHY isoform X1 [Aegilops tauschii subsp. strangulata]	sp|F4K5X6|RVE2_ARATH;	Protein REVEILLE 2 OS=Arabidopsis thaliana OX=3702 GN=RVE2 PE=1 SV=1;	PF00249.33;PF13921.8;PF15963.7	Myb_DNA-binding;Myb_DNA-bind_6;Myb_DNA-bind_7	Myb-like DNA-binding domain;Myb-like DNA-binding domain;Myb DNA-binding like
TraesCS7A02G021800	MYB	0.596667	0.143333	-2.05756	down	-	GO:0006952;GO:0005634;GO:0005524;GO:0043531;GO:000367	BP:defense response;CC:nucleus;MF:ATP binding;MF:ADP binding;MF:DNA binding;	------	------	------	------	------	------	XP_040251369.1	disease resistance protein RGA5 [Aegilops tauschii subsp. strangulata]	sp|F7J0N2|RGA5R_ORYSJ;	Disease resistance protein RGA5 OS=Oryza sativa subsp. japonica OX=39947 GN=RGA5 PE=1 SV=1;	PF00931.24;PF00249.33;PF13921.8;PF18052.3	NB-ARC;Myb_DNA-binding;Myb_DNA-bind_6;Rx_N	NB-ARC domain;Myb-like DNA-binding domain;Myb-like DNA-binding domain;Rx N-terminal domain
TraesCS1D02G082400	MYB	5.59333	1.96333	-1.5104	down	-	GO:0006511;GO:0000209;GO:0005634;GO:0061631;GO:0016740;GO:0003677;GO:000552	BP:ubiquitin-dependent protein catabolic process;BP:protein polyubiquitination;CC:nucleus;MF:ubiquitin conjugating enzyme activity;MF:transferase activity;MF:DNA binding;MF:ATP binding;	K06689	UBE2D, UBC4, UBC5	map04120;map04141	Ubiquitin mediated proteolysis;Protein processing in endoplasmic reticulum	COG5078	O:Posttranslational modification, protein turnover, chaperones	KAF6993635.1	hypothetical protein CFC21_010501 [Triticum aestivum]	sp|Q94F47|UBC28_ARATH;	Ubiquitin-conjugating enzyme E2 28 OS=Arabidopsis thaliana OX=3702 GN=UBC28 PE=1 SV=1;	PF00179.28	UQ_con	Ubiquitin-conjugating enzyme
TraesCS7B02G472600	NAC	3.74667	1.80667	-1.05228	down	-	GO:0006355;GO:0005634;GO:000367	BP:regulation of transcription, DNA-templated;CC:nucleus;MF:DNA binding;	------	------	------	------	ENOG41115KT	S:Function unknown	KAF7105125.1	hypothetical protein CFC21_105963 [Triticum aestivum]	sp|Q10S65|NAC22_ORYSJ;	NAC domain-containing protein 22 OS=Oryza sativa subsp. japonica OX=39947 GN=NAC022 PE=2 SV=1;	PF02365.17	NAM	No apical meristem
TraesCS2A02G459700	NAC	1.23667	0.583333	-1.08407	down	-	GO:0006355;GO:0005634;GO:000367	BP:regulation of transcription, DNA-templated;CC:nucleus;MF:DNA binding;	------	------	------	------	ENOG41108W6;ENOG410Y97V;ENOG4111BC1	S:Function unknown;K:Transcription;K:Transcription	KAF7003660.1	hypothetical protein CFC21_018953 [Triticum aestivum]	sp|Q75HE5|NAC2_ORYSJ;	NAC domain-containing protein 2 OS=Oryza sativa subsp. japonica OX=39947 GN=NAC002 PE=1 SV=1;	PF02365.17	NAM	No apical meristem
TraesCS3A02G375400	NAC	0.93	0.236667	-1.97437	down	-	GO:0006355;GO:0005634;GO:000367	BP:regulation of transcription, DNA-templated;CC:nucleus;MF:DNA binding;	------	------	------	------	ENOG410YGJ5	S:Function unknown	KAF7024745.1	hypothetical protein CFC21_037045 [Triticum aestivum]	sp|Q9FMR3|NAC90_ARATH;	NAC domain-containing protein 90 OS=Arabidopsis thaliana OX=3702 GN=NAC090 PE=1 SV=1;	PF02365.17	NAM	No apical meristem
TraesCS5A02G049100	NAC	0.833333	0.073333	-3.50636	down	-	GO:0006355;GO:000367	BP:regulation of transcription, DNA-templated;MF:DNA binding;	------	------	------	------	ENOG410YDRK	S:Function unknown	XP_037432309.1	NAC domain-containing protein 21/22-like isoform X1 [Triticum dicoccoides]	sp|Q84TE6|NAC22_ARATH;	NAC domain-containing protein 21/22 OS=Arabidopsis thaliana OX=3702 GN=NAC021 PE=1 SV=2;	PF02365.17	NAM	No apical meristem
TraesCS5A02G029900	NF-YA	0.876667	2.06333	1.23488	up	-	GO:0006355;GO:0006357;GO:0016602;GO:0005634;GO:0003700;GO:0003677;GO:0000978;GO:000098	BP:regulation of transcription, DNA-templated;BP:regulation of transcription from RNA polymerase II promoter;CC:CCAAT-binding factor complex;CC:nucleus;MF:transcription factor activity, sequence-specific DNA binding;MF:DNA binding;MF:RNA polymerase II core promoter proximal region sequence-specific DNA binding;MF:RNA polymerase II transcription factor activity, sequence-specific DNA binding;	K08064	NFYA, HAP2	------	------	COG5224	K:Transcription	KAF7056657.1	hypothetical protein CFC21_064042 [Triticum aestivum]	sp|Q9M9X4|NFYA2_ARATH;	Nuclear transcription factor Y subunit A-2 OS=Arabidopsis thaliana OX=3702 GN=NFYA2 PE=2 SV=1;	PF02045.17	CBFB_NFYA	CCAAT-binding transcription factor
TraesCS5D02G406500	WRKY	0.4	1.17667	1.55663	up	WRKY DNA-binding protein 58 [Source:Projected from Arabidopsis thaliana (AT3G01080) UniProtKB/TrEMBL;Acc:A0A1I9LLS8]	GO:0006355;GO:0005634;GO:0003700;GO:004356	BP:regulation of transcription, DNA-templated;CC:nucleus;MF:transcription factor activity, sequence-specific DNA binding;MF:sequence-specific DNA binding;	------	------	------	------	ENOG4110JQH;ENOG41104VV	S:Function unknown;	KAF7074766.1	hypothetical protein CFC21_079590 [Triticum aestivum]	sp|Q6B6R4|WRK24_ORYSI;	WRKY transcription factor WRKY24 OS=Oryza sativa subsp. indica OX=39946 GN=WRKY24 PE=2 SV=1;	PF03106.17	WRKY	WRKY DNA -binding domain
TraesCS5A02G396800	WRKY	0.9	1.95333	1.11794	up	WRKY DNA-binding protein 58 [Source:Projected from Arabidopsis thaliana (AT3G01080) UniProtKB/TrEMBL;Acc:A0A1I9LLS8]	GO:0006355;GO:0005634;GO:0003700;GO:004356	BP:regulation of transcription, DNA-templated;CC:nucleus;MF:transcription factor activity, sequence-specific DNA binding;MF:sequence-specific DNA binding;	------	------	------	------	ENOG4110JQH;ENOG41104VV	S:Function unknown;	KAF7061024.1	hypothetical protein CFC21_067754 [Triticum aestivum]	sp|Q9XI90|WRKY4_ARATH;	Probable WRKY transcription factor 4 OS=Arabidopsis thaliana OX=3702 GN=WRKY4 PE=1 SV=2;	PF03106.17	WRKY	WRKY DNA -binding domain
TraesCS1B02G374900	WRKY	3.83	1.88667	-1.0215	down	-	GO:0006355;GO:0005634;GO:0003700;GO:004356	BP:regulation of transcription, DNA-templated;CC:nucleus;MF:transcription factor activity, sequence-specific DNA binding;MF:sequence-specific DNA binding;	------	------	------	------	ENOG410YQZM	K:Transcription	KAF6991390.1	hypothetical protein CFC21_008476 [Triticum aestivum]	sp|Q8VWQ5|WRK50_ARATH;	Probable WRKY transcription factor 50 OS=Arabidopsis thaliana OX=3702 GN=WRKY50 PE=2 SV=1;	PF03106.17	WRKY	WRKY DNA -binding domain
TraesCS3A02G111200	WRKY	5.86667	2.88333	-1.0248	down	WRKY transcription factor [Source:UniProtKB/TrEMBL;Acc:A3FBG1]	GO:0006355;GO:0050896;GO:0005634;GO:0043565;GO:0003700;GO:000367	BP:regulation of transcription, DNA-templated;BP:response to stimulus;CC:nucleus;MF:sequence-specific DNA binding;MF:transcription factor activity, sequence-specific DNA binding;MF:DNA binding;	------	------	------	------	ENOG410YQZM	K:Transcription	XP_037409055.1	probable WRKY transcription factor 51 [Triticum dicoccoides]	sp|Q8VWQ5|WRK50_ARATH;	Probable WRKY transcription factor 50 OS=Arabidopsis thaliana OX=3702 GN=WRKY50 PE=2 SV=1;	PF03106.17	WRKY	WRKY DNA -binding domain
TraesCS5A02G185600	WRKY	17.53	8.51667	-1.04147	down	-	GO:0006355;GO:0050896;GO:0005634;GO:0043565;GO:0003700;GO:000367	BP:regulation of transcription, DNA-templated;BP:response to stimulus;CC:nucleus;MF:sequence-specific DNA binding;MF:transcription factor activity, sequence-specific DNA binding;MF:DNA binding;	------	------	------	------	ENOG410YBEV	K:Transcription	XP_037434168.1	probable WRKY transcription factor 41 [Triticum dicoccoides]	sp|Q0DFT7|WRK19_ORYSJ;	Transcription factor WRKY19 OS=Oryza sativa subsp. japonica OX=39947 GN=WRKY19 PE=2 SV=1;	PF03106.17	WRKY	WRKY DNA -binding domain
TraesCS3D02G113200	WRKY	6.9	3.29	-1.06851	down	-	GO:0006355;GO:0050896;GO:0005634;GO:0043565;GO:0003700;GO:000367	BP:regulation of transcription, DNA-templated;BP:response to stimulus;CC:nucleus;MF:sequence-specific DNA binding;MF:transcription factor activity, sequence-specific DNA binding;MF:DNA binding;	------	------	------	------	ENOG410YQZM	K:Transcription	XP_020188165.1	WRKY transcription factor WRKY24 [Aegilops tauschii subsp. strangulata]	sp|Q8VWQ5|WRK50_ARATH;	Probable WRKY transcription factor 50 OS=Arabidopsis thaliana OX=3702 GN=WRKY50 PE=2 SV=1;	PF03106.17	WRKY	WRKY DNA -binding domain
TraesCS1A02G070400	WRKY	30.6433	14.0033	-1.1298	down	-	GO:0006355;GO:0050896;GO:0005634;GO:0043565;GO:0003700;GO:000367	BP:regulation of transcription, DNA-templated;BP:response to stimulus;CC:nucleus;MF:sequence-specific DNA binding;MF:transcription factor activity, sequence-specific DNA binding;MF:DNA binding;	K13424	WRKY33	map04016;map04626	MAPK signaling pathway - plant;Plant-pathogen interaction	ENOG4112BTF	K:Transcription	KAF6982392.1	hypothetical protein CFC21_000788 [Triticum aestivum]	sp|Q6IEQ7|WRK24_ORYSJ;	WRKY transcription factor WRKY24 OS=Oryza sativa subsp. japonica OX=39947 GN=WRKY24 PE=2 SV=1;	PF03106.17	WRKY	WRKY DNA -binding domain
TraesCS1B02G088900	WRKY	28.2067	12.5367	-1.16988	down	-	GO:0006355;GO:0050896;GO:0005634;GO:0043565;GO:0003700;GO:000367	BP:regulation of transcription, DNA-templated;BP:response to stimulus;CC:nucleus;MF:sequence-specific DNA binding;MF:transcription factor activity, sequence-specific DNA binding;MF:DNA binding;	K13424	WRKY33	map04016;map04626	MAPK signaling pathway - plant;Plant-pathogen interaction	ENOG4112BTF	K:Transcription	ANJ45122.1	WRKY transcription factor, partial [Triticum aestivum]	sp|Q6IEQ7|WRK24_ORYSJ;	WRKY transcription factor WRKY24 OS=Oryza sativa subsp. japonica OX=39947 GN=WRKY24 PE=2 SV=1;	PF03106.17	WRKY	WRKY DNA -binding domain
TraesCS7D02G497300	WRKY	5.45667	2.42333	-1.17103	down	-	GO:0006355;GO:0050896;GO:0005634;GO:0043565;GO:0003700;GO:000367	BP:regulation of transcription, DNA-templated;BP:response to stimulus;CC:nucleus;MF:sequence-specific DNA binding;MF:transcription factor activity, sequence-specific DNA binding;MF:DNA binding;	------	------	------	------	ENOG410YHES	K:Transcription	KAF7111452.1	hypothetical protein CFC21_111466 [Triticum aestivum]	sp|Q0DAJ3|WRK28_ORYSJ;	WRKY transcription factor WRKY28 OS=Oryza sativa subsp. japonica OX=39947 GN=WRKY28 PE=2 SV=2;	PF03106.17	WRKY	WRKY DNA -binding domain
TraesCS3B02G129900	WRKY	6.32333	2.59	-1.28773	down	-	GO:0006355;GO:0050896;GO:0005634;GO:0043565;GO:0003700;GO:000367	BP:regulation of transcription, DNA-templated;BP:response to stimulus;CC:nucleus;MF:sequence-specific DNA binding;MF:transcription factor activity, sequence-specific DNA binding;MF:DNA binding;	------	------	------	------	ENOG410YQZM	K:Transcription	KAF7028273.1	hypothetical protein CFC21_040225 [Triticum aestivum]	sp|Q8VWQ5|WRK50_ARATH;	Probable WRKY transcription factor 50 OS=Arabidopsis thaliana OX=3702 GN=WRKY50 PE=2 SV=1;	PF03106.17	WRKY	WRKY DNA -binding domain
TraesCS7A02G338500	WRKY	1.41333	0.543333	-1.37919	down	-	GO:0006355;GO:0050896;GO:0005634;GO:0043565;GO:0003700;GO:000367	BP:regulation of transcription, DNA-templated;BP:response to stimulus;CC:nucleus;MF:sequence-specific DNA binding;MF:transcription factor activity, sequence-specific DNA binding;MF:DNA binding;	------	------	------	------	ENOG410YZZY	K:Transcription	XP_037462379.1	probable WRKY transcription factor 70 [Triticum dicoccoides]	sp|Q9SKD9|WRK46_ARATH;	Probable WRKY transcription factor 46 OS=Arabidopsis thaliana OX=3702 GN=WRKY46 PE=1 SV=1;	PF03106.17	WRKY	WRKY DNA -binding domain
TraesCS7D02G497400	WRKY	13.7	4.27333	-1.68074	down	-	GO:0009751;GO:0009737;GO:0010200;GO:0009753;GO:0009611;GO:0009723;GO:0050832;GO:0006355;GO:0045892;GO:0009414;GO:0009651;GO:0009409;GO:0009938;GO:0002237;GO:0002238;GO:0009739;GO:0031347;GO:0005634;GO:0043565;GO:0003700;GO:199084	BP:response to salicylic acid;BP:response to abscisic acid;BP:response to chitin;BP:response to jasmonic acid;BP:response to wounding;BP:response to ethylene;BP:defense response to fungus;BP:regulation of transcription, DNA-templated;BP:negative regulation of transcription, DNA-templated;BP:response to water deprivation;BP:response to salt stress;BP:response to cold;BP:negative regulation of gibb…	------	------	------	------	ENOG410YHES	K:Transcription	XP_040250978.1	WRKY transcription factor WRKY28-like [Aegilops tauschii subsp. strangulata]	sp|Q6IEL0|WRK71_ORYSI;	WRKY transcription factor WRKY71 OS=Oryza sativa subsp. indica OX=39946 GN=WRKY71 PE=1 SV=1;	PF03106.17	WRKY	WRKY DNA -binding domain
TraesCS7D02G497800	WRKY	1.94	0.56	-1.79256	down	-	GO:0009751;GO:0009737;GO:0010200;GO:0009753;GO:0009611;GO:0009723;GO:0050832;GO:0006355;GO:0045892;GO:0009414;GO:0009651;GO:0009409;GO:0009938;GO:0002237;GO:0002238;GO:0009739;GO:0031347;GO:0005634;GO:0043565;GO:0003700;GO:199084	BP:response to salicylic acid;BP:response to abscisic acid;BP:response to chitin;BP:response to jasmonic acid;BP:response to wounding;BP:response to ethylene;BP:defense response to fungus;BP:regulation of transcription, DNA-templated;BP:negative regulation of transcription, DNA-templated;BP:response to water deprivation;BP:response to salt stress;BP:response to cold;BP:negative regulation of gibb…	------	------	------	------	ENOG410YHES	K:Transcription	KAF7111456.1	hypothetical protein CFC21_111468 [Triticum aestivum]	sp|Q0DAJ3|WRK28_ORYSJ;	WRKY transcription factor WRKY28 OS=Oryza sativa subsp. japonica OX=39947 GN=WRKY28 PE=2 SV=2;	PF03106.17	WRKY	WRKY DNA -binding domain
TraesCS3B02G375800	WRKY	1.54333	0.433333	-1.8325	down	-	GO:0006355;GO:0050896;GO:0005634;GO:0043565;GO:0003700;GO:000367	BP:regulation of transcription, DNA-templated;BP:response to stimulus;CC:nucleus;MF:sequence-specific DNA binding;MF:transcription factor activity, sequence-specific DNA binding;MF:DNA binding;	------	------	------	------	ENOG41105AP	S:Function unknown	XP_037418022.1	probable WRKY transcription factor 30 [Triticum dicoccoides]	sp|Q0DFT7|WRK19_ORYSJ;	Transcription factor WRKY19 OS=Oryza sativa subsp. japonica OX=39947 GN=WRKY19 PE=2 SV=1;	PF03106.17	WRKY	WRKY DNA -binding domain
TraesCS7A02G508800	WRKY	16.8133	4.60667	-1.86781	down	-	GO:0009751;GO:0009737;GO:0010200;GO:0009753;GO:0009611;GO:0009723;GO:0050832;GO:0006355;GO:0045892;GO:0009414;GO:0009651;GO:0009409;GO:0009938;GO:0002237;GO:0002238;GO:0009739;GO:0031347;GO:0005634;GO:0043565;GO:0003700;GO:199084	BP:response to salicylic acid;BP:response to abscisic acid;BP:response to chitin;BP:response to jasmonic acid;BP:response to wounding;BP:response to ethylene;BP:defense response to fungus;BP:regulation of transcription, DNA-templated;BP:negative regulation of transcription, DNA-templated;BP:response to water deprivation;BP:response to salt stress;BP:response to cold;BP:negative regulation of gibb…	------	------	------	------	ENOG410YHES	K:Transcription	KAF7098501.1	hypothetical protein CFC21_100241 [Triticum aestivum]	sp|B8B0R8|WRK28_ORYSI;	WRKY transcription factor WRKY28 OS=Oryza sativa subsp. indica OX=39946 GN=WRKY28 PE=3 SV=2;	PF03106.17	WRKY	WRKY DNA -binding domain
TraesCS7B02G418500	WRKY	5.51667	1.29333	-2.0927	down	-	GO:0009414;GO:0009651;GO:0031347;GO:0009751;GO:0009753;GO:0009611;GO:0050832;GO:0045892;GO:0009409;GO:0009737;GO:0010200;GO:0050896;GO:0009723;GO:0006355;GO:0002237;GO:0009938;GO:0002238;GO:0009739;GO:0005634;GO:0003677;GO:0043565;GO:1990841;GO:000370	BP:response to water deprivation;BP:response to salt stress;BP:regulation of defense response;BP:response to salicylic acid;BP:response to jasmonic acid;BP:response to wounding;BP:defense response to fungus;BP:negative regulation of transcription, DNA-templated;BP:response to cold;BP:response to abscisic acid;BP:response to chitin;BP:response to stimulus;BP:response to ethylene;BP:regulation of t…	------	------	------	------	ENOG410YHES	K:Transcription	KAF7104501.1	hypothetical protein CFC21_105393 [Triticum aestivum]	sp|Q6IEL0|WRK71_ORYSI;	WRKY transcription factor WRKY71 OS=Oryza sativa subsp. indica OX=39946 GN=WRKY71 PE=1 SV=1;	PF03106.17	WRKY	WRKY DNA -binding domain
TraesCS7B02G418400	WRKY	2.62333	0.346667	-2.91978	down	-	GO:0009751;GO:0009737;GO:0010200;GO:0009753;GO:0009611;GO:0009723;GO:0050832;GO:0006355;GO:0045892;GO:0009414;GO:0009651;GO:0009409;GO:0009938;GO:0002237;GO:0002238;GO:0009739;GO:0031347;GO:0005634;GO:0043565;GO:0003700;GO:199084	BP:response to salicylic acid;BP:response to abscisic acid;BP:response to chitin;BP:response to jasmonic acid;BP:response to wounding;BP:response to ethylene;BP:defense response to fungus;BP:regulation of transcription, DNA-templated;BP:negative regulation of transcription, DNA-templated;BP:response to water deprivation;BP:response to salt stress;BP:response to cold;BP:negative regulation of gibb…	------	------	------	------	ENOG410YHES	K:Transcription	KAF7104499.1	hypothetical protein CFC21_105392 [Triticum aestivum]	sp|Q6IEL0|WRK71_ORYSI;	WRKY transcription factor WRKY71 OS=Oryza sativa subsp. indica OX=39946 GN=WRKY71 PE=1 SV=1;	PF03106.17	WRKY	WRKY DNA -binding domain
TraesCS3B02G375600	WRKY	0.5	0.056667	-3.14135	down	-	GO:0006355;GO:0050896;GO:0005634;GO:0043565;GO:0003700;GO:000367	BP:regulation of transcription, DNA-templated;BP:response to stimulus;CC:nucleus;MF:sequence-specific DNA binding;MF:transcription factor activity, sequence-specific DNA binding;MF:DNA binding;	------	------	------	------	ENOG411087D	K:Transcription	KAF7031356.1	hypothetical protein CFC21_042697 [Triticum aestivum]	sp|Q8H0Y8|WRK41_ARATH;	Probable WRKY transcription factor 41 OS=Arabidopsis thaliana OX=3702 GN=WRKY41 PE=1 SV=2;	PF03106.17	WRKY	WRKY DNA -binding domain

## Sheet: Table S5-2
Table S5-2. Expression and functional annotation of TFs in Fielder_LP vs. CK.
Gene_id	TF family	Fielder_CK	Fielder_LP	Log2(FC)	Regulation	Gene_description	GO_id	GO_term	KO_id	KO_name	Pathway_id	Pathway_definition	EggNOG_id	EggNOG_Functional Categories	NR_hit-name	NR_description	Swiss-Prot_hit-name	Swiss-Prot_description	Pfam_id	Domain	Domain description
TraesCS5A02G310700	AP2	0.466667	3.28667	2.81616	up	-	GO:0006355;GO:0006351;GO:0005634;GO:0003700;GO:000367	BP:regulation of transcription, DNA-templated;BP:transcription, DNA-templated;CC:nucleus;MF:transcription factor activity, sequence-specific DNA binding;MF:DNA binding;	------	------	------	------	ENOG411074H	K:Transcription	VAI20025.1	unnamed protein product [Triticum turgidum subsp. durum]	sp|Q3T5N4|DRE1B_ORYSJ;	Dehydration-responsive element-binding protein 1B OS=Oryza sativa subsp. japonica OX=39947 GN=DREB1B PE=2 SV=1;	PF00847.22	AP2	AP2 domain
TraesCS1B02G335100	AP2	0.353333	1.71333	2.27771	up	-	GO:0006355;GO:0006351;GO:0005634;GO:0003700;GO:000367	BP:regulation of transcription, DNA-templated;BP:transcription, DNA-templated;CC:nucleus;MF:transcription factor activity, sequence-specific DNA binding;MF:DNA binding;	------	------	------	------	ENOG411074H	K:Transcription	KAF6990936.1	hypothetical protein CFC21_008079 [Triticum aestivum]	sp|Q8GUW4|DRE1B_ORYSI;	Dehydration-responsive element-binding protein 1B OS=Oryza sativa subsp. indica OX=39946 GN=DREB1B PE=2 SV=1;	PF00847.22	AP2	AP2 domain
TraesCS5A02G310500	AP2	0.583333	2.41333	2.04864	up	CBFIVd-A22 [Source:UniProtKB/TrEMBL;Acc:A0MPM3]	GO:0006355;GO:0006351;GO:0005634;GO:0003700;GO:000367	BP:regulation of transcription, DNA-templated;BP:transcription, DNA-templated;CC:nucleus;MF:transcription factor activity, sequence-specific DNA binding;MF:DNA binding;	------	------	------	------	ENOG411074H	K:Transcription	ABK55388.1	CBFIVd-A22 [Triticum aestivum]	sp|Q8GUW4|DRE1B_ORYSI;	Dehydration-responsive element-binding protein 1B OS=Oryza sativa subsp. indica OX=39946 GN=DREB1B PE=2 SV=1;	PF00847.22	AP2	AP2 domain
TraesCS6D02G232700	AP2	0.55	1.79667	1.70782	up	-	GO:0006355;GO:0006351;GO:0005634;GO:0003700;GO:000367	BP:regulation of transcription, DNA-templated;BP:transcription, DNA-templated;CC:nucleus;MF:transcription factor activity, sequence-specific DNA binding;MF:DNA binding;	------	------	------	------	ENOG410YK37;ENOG410YRMB	K:Transcription;	XP_020194839.1	ethylene-responsive transcription factor ERF038 [Aegilops tauschii subsp. strangulata]	sp|Q8LBQ7|ERF34_ARATH;	Ethylene-responsive transcription factor ERF034 OS=Arabidopsis thaliana OX=3702 GN=ERF034 PE=2 SV=2;	PF00847.22	AP2	AP2 domain
TraesCS5B02G311300	AP2	1.38667	3.49333	1.33298	up	-	GO:0006355;GO:0005634;GO:0003700;GO:000367	BP:regulation of transcription, DNA-templated;CC:nucleus;MF:transcription factor activity, sequence-specific DNA binding;MF:DNA binding;	------	------	------	------	ENOG411074H	K:Transcription	KAF7066745.1	hypothetical protein CFC21_072684, partial [Triticum aestivum]	sp|Q8GUW4|DRE1B_ORYSI;	Dehydration-responsive element-binding protein 1B OS=Oryza sativa subsp. indica OX=39946 GN=DREB1B PE=2 SV=1;	PF00847.22	AP2	AP2 domain
TraesCS5D02G317400	AP2	2.70667	6.13	1.17937	up	CBFIVd-D22 [Source:UniProtKB/TrEMBL;Acc:A0MPM5]	GO:0006355;GO:0006351;GO:0005634;GO:0003700;GO:000367	BP:regulation of transcription, DNA-templated;BP:transcription, DNA-templated;CC:nucleus;MF:transcription factor activity, sequence-specific DNA binding;MF:DNA binding;	------	------	------	------	ENOG411074H	K:Transcription	XP_020167760.1	dehydration-responsive element-binding protein 1B [Aegilops tauschii subsp. strangulata]	sp|Q8GUW4|DRE1B_ORYSI;	Dehydration-responsive element-binding protein 1B OS=Oryza sativa subsp. indica OX=39946 GN=DREB1B PE=2 SV=1;	PF00847.22	AP2	AP2 domain
TraesCS1A02G220000	AP2	0.923333	2.02	1.12943	up	-	GO:0006355;GO:0006351;GO:0005634;GO:0003700;GO:000367	BP:regulation of transcription, DNA-templated;BP:transcription, DNA-templated;CC:nucleus;MF:transcription factor activity, sequence-specific DNA binding;MF:DNA binding;	------	------	------	------	ENOG410YTKA	S:Function unknown	VAH06368.1	unnamed protein product [Triticum turgidum subsp. durum]	sp|Q9LYD3|DREB3_ARATH;	Dehydration-responsive element-binding protein 3 OS=Arabidopsis thaliana OX=3702 GN=DREB3 PE=2 SV=1;	PF00847.22	AP2	AP2 domain
TraesCS4A02G035400	AP2	14.9433	6.88	-1.11902	down	Dehydration responsive element binding protein [Source:UniProtKB/TrEMBL;Acc:A0MAU3]	GO:0006355;GO:0006351;GO:0005634;GO:0043565;GO:0003700;GO:000367	BP:regulation of transcription, DNA-templated;BP:transcription, DNA-templated;CC:nucleus;MF:sequence-specific DNA binding;MF:transcription factor activity, sequence-specific DNA binding;MF:DNA binding;	K09286	EREBP	------	------	ENOG410ZKQ8;ENOG410YGN6	K:Transcription;	XP_037419793.1	ethylene-responsive transcription factor ERF060-like [Triticum dicoccoides]	sp|O65665|ERF60_ARATH;	Ethylene-responsive transcription factor ERF060 OS=Arabidopsis thaliana OX=3702 GN=ERF060 PE=1 SV=1;	PF00847.22	AP2	AP2 domain
TraesCS2D02G515900	AP2	8.96667	4.05333	-1.14546	down	-	GO:0006355;GO:0005634;GO:0003700;GO:000367	BP:regulation of transcription, DNA-templated;CC:nucleus;MF:transcription factor activity, sequence-specific DNA binding;MF:DNA binding;	K09286	EREBP	------	------	ENOG410YR77	K:Transcription	XP_020191028.1	ethylene-responsive transcription factor ERF008 [Aegilops tauschii subsp. strangulata]	sp|O22174|ERF08_ARATH;	Ethylene-responsive transcription factor ERF008 OS=Arabidopsis thaliana OX=3702 GN=ERF008 PE=2 SV=1;	PF00847.22	AP2	AP2 domain
TraesCS4B02G268100	AP2	8.36333	3.66333	-1.19092	down	-	GO:0006355;GO:0005634;GO:0003700;GO:0043565;GO:000367	BP:regulation of transcription, DNA-templated;CC:nucleus;MF:transcription factor activity, sequence-specific DNA binding;MF:sequence-specific DNA binding;MF:DNA binding;	K09286	EREBP	------	------	ENOG410ZKQ8;ENOG410YGN6	K:Transcription;	XP_037426073.1	ethylene-responsive transcription factor ERF060-like [Triticum dicoccoides]	sp|O65665|ERF60_ARATH;	Ethylene-responsive transcription factor ERF060 OS=Arabidopsis thaliana OX=3702 GN=ERF060 PE=1 SV=1;	PF00847.22	AP2	AP2 domain
TraesCS4D02G267500	AP2	8.34	3.46667	-1.2665	down	-	GO:0006355;GO:0005634;GO:0003700;GO:0043565;GO:000367	BP:regulation of transcription, DNA-templated;CC:nucleus;MF:transcription factor activity, sequence-specific DNA binding;MF:sequence-specific DNA binding;MF:DNA binding;	K09286	EREBP	------	------	ENOG410ZKQ8;ENOG410YGN6	K:Transcription;	KAF7055169.1	hypothetical protein CFC21_062734 [Triticum aestivum]	sp|Q9FJQ2|ERF57_ARATH;	Ethylene-responsive transcription factor ERF057 OS=Arabidopsis thaliana OX=3702 GN=ERF057 PE=2 SV=1;	PF00847.22	AP2	AP2 domain
TraesCS7D02G052400	AP2	2.20333	0.816667	-1.43187	down	CBFII-5.2 [Source:UniProtKB/TrEMBL;Acc:A0MPJ1]	GO:0006355;GO:0006351;GO:0005634;GO:0003700;GO:000367	BP:regulation of transcription, DNA-templated;BP:transcription, DNA-templated;CC:nucleus;MF:transcription factor activity, sequence-specific DNA binding;MF:DNA binding;	------	------	------	------	ENOG411074Q;ENOG410YK37	K:Transcription;	XP_020162370.1	dehydration-responsive element-binding protein 1C [Aegilops tauschii subsp. strangulata]	sp|A2Y8S6|DRE1C_ORYSI;	Dehydration-responsive element-binding protein 1C OS=Oryza sativa subsp. indica OX=39946 GN=DREB1C PE=3 SV=1;	PF00847.22	AP2	AP2 domain
TraesCS4B02G299600	AP2	16.0633	5.67333	-1.5015	down	-	GO:0006355;GO:0006351;GO:0005634;GO:0003700;GO:000367	BP:regulation of transcription, DNA-templated;BP:transcription, DNA-templated;CC:nucleus;MF:transcription factor activity, sequence-specific DNA binding;MF:DNA binding;	K09286	EREBP	------	------	ENOG41103N0;ENOG41116YA	K:Transcription;S:Function unknown	KAF7050616.1	hypothetical protein CFC21_058951 [Triticum aestivum]	sp|Q8H0T5|ERF73_ARATH;	Ethylene-responsive transcription factor ERF073 OS=Arabidopsis thaliana OX=3702 GN=ERF073 PE=1 SV=2;	PF00847.22	AP2	AP2 domain
TraesCS5D02G245300	AP2	3.54667	1.24	-1.51612	down	-	GO:0006355;GO:0005634;GO:0003700;GO:000367	BP:regulation of transcription, DNA-templated;CC:nucleus;MF:transcription factor activity, sequence-specific DNA binding;MF:DNA binding;	------	------	------	------	ENOG410YY7D;ENOG410YN6X	K:Transcription;	XP_020177674.1	ethylene-responsive transcription factor ERF109 [Aegilops tauschii subsp. strangulata]	sp|Q9SZ06|EF109_ARATH;	Ethylene-responsive transcription factor ERF109 OS=Arabidopsis thaliana OX=3702 GN=ERF109 PE=1 SV=1;	PF00847.22	AP2	AP2 domain
TraesCS2B02G411500	AP2	3.78667	1.31333	-1.5277	down	-	GO:0006355;GO:0006351;GO:0005634;GO:0003700;GO:000367	BP:regulation of transcription, DNA-templated;BP:transcription, DNA-templated;CC:nucleus;MF:transcription factor activity, sequence-specific DNA binding;MF:DNA binding;	K14516	ERF1	map04016;map04075	MAPK signaling pathway - plant;Plant hormone signal transduction	ENOG4111E8T;ENOG410YJNR	K:Transcription;	KAF7010298.1	hypothetical protein CFC21_024721 [Triticum aestivum]	sp|Q8LDC8|ERF92_ARATH;	Ethylene-responsive transcription factor 1B OS=Arabidopsis thaliana OX=3702 GN=ERF1B PE=1 SV=2;	PF00847.22	AP2	AP2 domain
TraesCS1D02G376700	AP2	2.6	0.87	-1.57942	down	-	GO:0006355;GO:0006351;GO:0005634;GO:0003700;GO:000367	BP:regulation of transcription, DNA-templated;BP:transcription, DNA-templated;CC:nucleus;MF:transcription factor activity, sequence-specific DNA binding;MF:DNA binding;	------	------	------	------	ENOG410YN6X;ENOG410YY7D	K:Transcription;	KAF6997260.1	hypothetical protein CFC21_013503 [Triticum aestivum]	sp|Q9SZ06|EF109_ARATH;	Ethylene-responsive transcription factor ERF109 OS=Arabidopsis thaliana OX=3702 GN=ERF109 PE=1 SV=1;	PF00847.22	AP2	AP2 domain
TraesCS6D02G299100	AP2	1.39	0.436667	-1.67048	down	-	GO:0006355;GO:0006351;GO:0005634;GO:0003700;GO:000367	BP:regulation of transcription, DNA-templated;BP:transcription, DNA-templated;CC:nucleus;MF:transcription factor activity, sequence-specific DNA binding;MF:DNA binding;	------	------	------	------	ENOG41105NJ	S:Function unknown	KAF7091172.1	hypothetical protein CFC21_093811 [Triticum aestivum]	sp|Q70II3|EF110_ARATH;	Ethylene-responsive transcription factor ERF110 OS=Arabidopsis thaliana OX=3702 GN=ERF110 PE=2 SV=2;	PF00847.22	AP2	AP2 domain
TraesCS1D02G376600	AP2	3.37667	1.00333	-1.7508	down	-	GO:0006355;GO:0005634;GO:0003700;GO:000367	BP:regulation of transcription, DNA-templated;CC:nucleus;MF:transcription factor activity, sequence-specific DNA binding;MF:DNA binding;	------	------	------	------	ENOG410YN6X	K:Transcription	KAF6997259.1	hypothetical protein CFC21_013502 [Triticum aestivum]	sp|Q9SZ06|EF109_ARATH;	Ethylene-responsive transcription factor ERF109 OS=Arabidopsis thaliana OX=3702 GN=ERF109 PE=1 SV=1;	PF00847.22	AP2	AP2 domain
TraesCS7A02G057700	AP2	2.51	0.736667	-1.7686	down	AP2 domain CBF protein [Source:UniProtKB/TrEMBL;Acc:K9M7E0]	GO:0006355;GO:0006351;GO:0005634;GO:0003700;GO:000367	BP:regulation of transcription, DNA-templated;BP:transcription, DNA-templated;CC:nucleus;MF:transcription factor activity, sequence-specific DNA binding;MF:DNA binding;	------	------	------	------	ENOG411074Q;ENOG410YK37	K:Transcription;	AFR67797.1	AP2 domain CBF protein [Triticum aestivum]	sp|A2Y8S6|DRE1C_ORYSI;	Dehydration-responsive element-binding protein 1C OS=Oryza sativa subsp. indica OX=39946 GN=DREB1C PE=3 SV=1;	PF00847.22	AP2	AP2 domain
TraesCS4D02G087000	AP2	2.27	0.636667	-1.83408	down	-	GO:0006355;GO:0006351;GO:0005634;GO:0003700;GO:000367	BP:regulation of transcription, DNA-templated;BP:transcription, DNA-templated;CC:nucleus;MF:transcription factor activity, sequence-specific DNA binding;MF:DNA binding;	------	------	------	------	ENOG410YNYS	S:Function unknown	XP_020194566.1	ethylene-responsive transcription factor ERF022-like [Aegilops tauschii subsp. strangulata]	sp|Q9LQ28|ERF22_ARATH;	Ethylene-responsive transcription factor ERF022 OS=Arabidopsis thaliana OX=3702 GN=ERF022 PE=2 SV=1;	PF00847.22	AP2	AP2 domain
TraesCS5B02G236900	AP2	2.7	0.65	-2.05445	down	-	GO:0006355;GO:0005634;GO:0003700;GO:000367	BP:regulation of transcription, DNA-templated;CC:nucleus;MF:transcription factor activity, sequence-specific DNA binding;MF:DNA binding;	------	------	------	------	ENOG410YY7D;ENOG410YN6X	K:Transcription;	XP_037438026.1	ethylene-responsive transcription factor ERF109-like [Triticum dicoccoides]	sp|Q9SZ06|EF109_ARATH;	Ethylene-responsive transcription factor ERF109 OS=Arabidopsis thaliana OX=3702 GN=ERF109 PE=1 SV=1;	PF00847.22	AP2	AP2 domain
TraesCS6B02G268100	AP2	0.81	0.17	-2.25239	down	AP2 domain CBF protein [Source:UniProtKB/TrEMBL;Acc:K9M7V3]	GO:0006355;GO:0006351;GO:0005634;GO:0003700;GO:000367	BP:regulation of transcription, DNA-templated;BP:transcription, DNA-templated;CC:nucleus;MF:transcription factor activity, sequence-specific DNA binding;MF:DNA binding;	------	------	------	------	ENOG410YK37	K:Transcription	XP_037453689.1	dehydration-responsive element-binding protein 1G-like [Triticum dicoccoides]	sp|A2XWL6|DRE1E_ORYSI;	Dehydration-responsive element-binding protein 1E OS=Oryza sativa subsp. indica OX=39946 GN=DREB1E PE=3 SV=1;	PF00847.22	AP2	AP2 domain
TraesCS2B02G127800	AP2	0.343333	0.07	-2.29418	down	Ethylene-responsive transcription factor ERF071 [Source:Projected from Arabidopsis thaliana (AT2G47520) UniProtKB/Swiss-Prot;Acc:O22259]	GO:2000280;GO:0006355;GO:0006351;GO:0034059;GO:0005634;GO:0003700;GO:000367	BP:regulation of root development;BP:regulation of transcription, DNA-templated;BP:transcription, DNA-templated;BP:response to anoxia;CC:nucleus;MF:transcription factor activity, sequence-specific DNA binding;MF:DNA binding;	K09286	EREBP	------	------	ENOG41124AA	K:Transcription	KAF7006786.1	hypothetical protein CFC21_021792 [Triticum aestivum]	sp|Q8H0T5|ERF73_ARATH;	Ethylene-responsive transcription factor ERF073 OS=Arabidopsis thaliana OX=3702 GN=ERF073 PE=1 SV=2;	PF00847.22	AP2	AP2 domain
TraesCS4A02G433200	AP2	3.25667	0.566667	-2.52282	down	CBFII-5.3 [Source:UniProtKB/TrEMBL;Acc:A0MPJ2]	GO:0006355;GO:0006351;GO:0005634;GO:0003700;GO:000367	BP:regulation of transcription, DNA-templated;BP:transcription, DNA-templated;CC:nucleus;MF:transcription factor activity, sequence-specific DNA binding;MF:DNA binding;	------	------	------	------	ENOG411074Q;ENOG410YK37	K:Transcription;	ABK55357.1	CBFII-5.3 [Triticum aestivum]	sp|A2Y8S6|DRE1C_ORYSI;	Dehydration-responsive element-binding protein 1C OS=Oryza sativa subsp. indica OX=39946 GN=DREB1C PE=3 SV=1;	PF00847.22	AP2	AP2 domain
TraesCS1A02G411100	AP2	0.273333	0.023333	-3.55022	down	Ethylene-responsive transcription factor ERF061 [Source:Projected from Arabidopsis thaliana (AT1G64380) UniProtKB/Swiss-Prot;Acc:Q9C7W2]	GO:0010200;GO:0006355;GO:0006351;GO:0005634;GO:0003700;GO:000367	BP:response to chitin;BP:regulation of transcription, DNA-templated;BP:transcription, DNA-templated;CC:nucleus;MF:transcription factor activity, sequence-specific DNA binding;MF:DNA binding;	------	------	------	------	ENOG410YMKN	K:Transcription	KAF6986486.1	hypothetical protein CFC21_004233 [Triticum aestivum]	sp|Q9C7W2|ERF61_ARATH;	Ethylene-responsive transcription factor ERF061 OS=Arabidopsis thaliana OX=3702 GN=ERF061 PE=2 SV=1;	PF00847.22	AP2	AP2 domain
TraesCS6D02G320700	AP2	0.33	0.016667	-4.3074	down	-	GO:0006355;GO:0006351;GO:0005634;GO:0003700;GO:000367	BP:regulation of transcription, DNA-templated;BP:transcription, DNA-templated;CC:nucleus;MF:transcription factor activity, sequence-specific DNA binding;MF:DNA binding;	------	------	------	------	ENOG410YZF0	K:Transcription	KAF7091451.1	hypothetical protein CFC21_094029 [Triticum aestivum]	sp|Q9C591|ERF16_ARATH;	Ethylene-responsive transcription factor ERF016 OS=Arabidopsis thaliana OX=3702 GN=ERF016 PE=2 SV=1;	PF00847.22	AP2	AP2 domain
TraesCS5A02G174700	AP2	0.43	0.02	-4.42626	down	-	GO:0006355;GO:0006351;GO:0005634;GO:0003700;GO:000367	BP:regulation of transcription, DNA-templated;BP:transcription, DNA-templated;CC:nucleus;MF:transcription factor activity, sequence-specific DNA binding;MF:DNA binding;	K09286	EREBP	------	------	------	------	XP_037434027.1	ethylene-responsive transcription factor 1-like [Triticum dicoccoides]	sp|Q6K7E6|ERF1_ORYSJ;	Ethylene-responsive transcription factor 1 OS=Oryza sativa subsp. japonica OX=39947 GN=EREBP1 PE=1 SV=1;	PF00847.22	AP2	AP2 domain
TraesCS7A02G362500	bHLH	0.016667	0.27	4.01789	up	-	GO:004698	MF:protein dimerization activity;	------	------	------	------	ENOG410YFS3	S:Function unknown	XP_037462345.1	putative transcription factor bHLH041 [Triticum dicoccoides]	sp|Q9LTS4|BH041_ARATH;	Putative transcription factor bHLH041 OS=Arabidopsis thaliana OX=3702 GN=BHLH41 PE=3 SV=1;	PF00010.28	HLH	Helix-loop-helix DNA-binding domain
TraesCS3B02G122800	bHLH	0.033333	0.523333	3.97271	up	-	GO:004698	MF:protein dimerization activity;	------	------	------	------	ENOG410ZMUQ	S:Function unknown	KAF7028189.1	hypothetical protein CFC21_040154 [Triticum aestivum]	sp|Q9LTS4|BH041_ARATH;	Putative transcription factor bHLH041 OS=Arabidopsis thaliana OX=3702 GN=BHLH41 PE=3 SV=1;	PF00010.28	HLH	Helix-loop-helix DNA-binding domain
TraesCS3D02G106600	bHLH	0.23	1.01667	2.14414	up	-	GO:004698	MF:protein dimerization activity;	------	------	------	------	ENOG410ZMUQ	S:Function unknown	XP_020164742.1	putative transcription factor bHLH041 [Aegilops tauschii subsp. strangulata]	sp|Q9LTS4|BH041_ARATH;	Putative transcription factor bHLH041 OS=Arabidopsis thaliana OX=3702 GN=BHLH41 PE=3 SV=1;	PF00010.28	HLH	Helix-loop-helix DNA-binding domain
TraesCS3A02G104400	bHLH	0.133333	0.556667	2.06178	up	-	GO:004698	MF:protein dimerization activity;	------	------	------	------	ENOG410ZMUQ	S:Function unknown	XP_037409049.1	putative transcription factor bHLH041 [Triticum dicoccoides]	sp|Q9LTS4|BH041_ARATH;	Putative transcription factor bHLH041 OS=Arabidopsis thaliana OX=3702 GN=BHLH41 PE=3 SV=1;	PF00010.28	HLH	Helix-loop-helix DNA-binding domain
TraesCS3A02G057900	bHLH	0.226667	0.83	1.87254	up	-	GO:004698	MF:protein dimerization activity;	------	------	------	------	ENOG410YB4F	K:Transcription	KAF7020741.1	hypothetical protein CFC21_033800 [Triticum aestivum]	sp|Q10S44|BH003_ORYSJ;	Transcription factor BHLH3 OS=Oryza sativa subsp. japonica OX=39947 GN=BHLH3 PE=1 SV=1;	PF00010.28	HLH	Helix-loop-helix DNA-binding domain
TraesCS2A02G271700	bHLH	1.32667	0.66	-1.00727	down	Transcription factor bHLH27 [Source:Projected from Arabidopsis thaliana (AT4G29930) UniProtKB/Swiss-Prot;Acc:Q700E3]	GO:004698	MF:protein dimerization activity;	------	------	------	------	ENOG410YDYS	K:Transcription	KAF7001385.1	hypothetical protein CFC21_017068 [Triticum aestivum]	sp|Q0JEB7|BH006_ORYSJ;	Transcription factor BHLH6 OS=Oryza sativa subsp. japonica OX=39947 GN=BHLH6 PE=1 SV=1;	PF00010.28	HLH	Helix-loop-helix DNA-binding domain
TraesCS5D02G060300	bHLH	4.66	2.29	-1.02498	down	-	GO:0005634;GO:004698	CC:nucleus;MF:protein dimerization activity;	K16189	PIF4	map04075	Plant hormone signal transduction	ENOG410YAGK	K:Transcription	XP_020189473.1	transcription factor PHYTOCHROME INTERACTING FACTOR-LIKE 13 [Aegilops tauschii subsp. strangulata]	sp|Q10CH5|PIL13_ORYSJ;	Transcription factor PHYTOCHROME INTERACTING FACTOR-LIKE 13 OS=Oryza sativa subsp. japonica OX=39947 GN=PIL13 PE=1 SV=1;	PF00010.28	HLH	Helix-loop-helix DNA-binding domain
TraesCS5B02G384500	bHLH	4.71	1.75333	-1.42563	down	-	GO:0009414;GO:004698	BP:response to water deprivation;MF:protein dimerization activity;	------	------	------	------	ENOG410YV10	K:Transcription	XP_037443359.1	transcription factor BHLH148-like isoform X1 [Triticum dicoccoides]	sp|Q75KV9|BH148_ORYSJ;	Transcription factor BHLH148 OS=Oryza sativa subsp. japonica OX=39947 GN=BHLH148 PE=1 SV=1;	PF00010.28	HLH	Helix-loop-helix DNA-binding domain
TraesCS5D02G390700	bHLH	12.2	3.86	-1.66021	down	-	GO:0009414;GO:004698	BP:response to water deprivation;MF:protein dimerization activity;	------	------	------	------	ENOG410YV10	K:Transcription	KAF7074584.1	hypothetical protein CFC21_079429 [Triticum aestivum]	sp|Q75KV9|BH148_ORYSJ;	Transcription factor BHLH148 OS=Oryza sativa subsp. japonica OX=39947 GN=BHLH148 PE=1 SV=1;	PF00010.28	HLH	Helix-loop-helix DNA-binding domain
TraesCS5A02G049600	bHLH	0.973333	0.306667	-1.66626	down	-	GO:0005634;GO:004698	CC:nucleus;MF:protein dimerization activity;	K16189	PIF4	map04075	Plant hormone signal transduction	ENOG410YAGK	K:Transcription	KAF7056859.1	hypothetical protein CFC21_064232 [Triticum aestivum]	sp|Q10CH5|PIL13_ORYSJ;	Transcription factor PHYTOCHROME INTERACTING FACTOR-LIKE 13 OS=Oryza sativa subsp. japonica OX=39947 GN=PIL13 PE=1 SV=1;	PF00010.28	HLH	Helix-loop-helix DNA-binding domain
TraesCS2B02G289900	bHLH	3.11	0.946667	-1.71599	down	BHLH27 [Source:UniProtKB/TrEMBL;Acc:W5BCK3]	GO:0006355;GO:0005634;GO:0003700;GO:0000976;GO:004698	BP:regulation of transcription, DNA-templated;CC:nucleus;MF:transcription factor activity, sequence-specific DNA binding;MF:transcription regulatory region sequence-specific DNA binding;MF:protein dimerization activity;	------	------	------	------	ENOG410YDYS	K:Transcription	XP_037485260.1	transcription factor bHLH35-like [Triticum dicoccoides]	sp|Q0JEB7|BH006_ORYSJ;	Transcription factor BHLH6 OS=Oryza sativa subsp. japonica OX=39947 GN=BHLH6 PE=1 SV=1;	PF00010.28	HLH	Helix-loop-helix DNA-binding domain
TraesCS5A02G380900	bHLH	2.54667	0.72	-1.82254	down	-	GO:0009414;GO:004698	BP:response to water deprivation;MF:protein dimerization activity;	------	------	------	------	ENOG410YV10	K:Transcription	XP_037436070.1	transcription factor BHLH148-like isoform X1 [Triticum dicoccoides]	sp|Q75KV9|BH148_ORYSJ;	Transcription factor BHLH148 OS=Oryza sativa subsp. japonica OX=39947 GN=BHLH148 PE=1 SV=1;	PF00010.28	HLH	Helix-loop-helix DNA-binding domain
TraesCS2D02G270300	bHLH	3.43	0.843333	-2.02403	down	Transcription factor bHLH27 [Source:Projected from Arabidopsis thaliana (AT4G29930) UniProtKB/Swiss-Prot;Acc:Q700E3]	GO:004698	MF:protein dimerization activity;	------	------	------	------	ENOG410YDYS	K:Transcription	XP_020160196.1	transcription factor bHLH35 [Aegilops tauschii subsp. strangulata]	sp|Q0JEB7|BH006_ORYSJ;	Transcription factor BHLH6 OS=Oryza sativa subsp. japonica OX=39947 GN=BHLH6 PE=1 SV=1;	PF00010.28	HLH	Helix-loop-helix DNA-binding domain
TraesCS2B02G167900	bZIP	7.06667	3.43	-1.04282	down	-	GO:0006990;GO:0006355;GO:0034976;GO:0016021;GO:0005789;GO:0005634;GO:0003700;GO:000367	BP:positive regulation of transcription from RNA polymerase II promoter involved in unfolded protein response;BP:regulation of transcription, DNA-templated;BP:response to endoplasmic reticulum stress;CC:integral component of membrane;CC:endoplasmic reticulum membrane;CC:nucleus;MF:transcription factor activity, sequence-specific DNA binding;MF:DNA binding;	------	------	------	------	ENOG410XUDS	K:Transcription	AML47732.1	bZIP transcription factor [Triticum aestivum]	sp|Q8LIB3|BZP60_ORYSJ;	bZIP transcription factor 60 OS=Oryza sativa subsp. japonica OX=39947 GN=BZIP60 PE=2 SV=1;	PF00170.23;PF07716.17	bZIP_1;bZIP_2	bZIP transcription factor;Basic region leucine zipper
TraesCS5D02G148700	bZIP	4.57667	11.6133	1.34341	up	-	GO:0006355;GO:0045893;GO:0005634;GO:0003700;GO:000367	BP:regulation of transcription, DNA-templated;BP:positive regulation of transcription, DNA-templated;CC:nucleus;MF:transcription factor activity, sequence-specific DNA binding;MF:DNA binding;	------	------	------	------	ENOG410YEVN	K:Transcription	XP_020168576.1	basic leucine zipper 19 [Aegilops tauschii subsp. strangulata]	sp|Q6K3R9|BZP19_ORYSJ;	Basic leucine zipper 19 OS=Oryza sativa subsp. japonica OX=39947 GN=BZIP19 PE=2 SV=1;	PF00170.23;PF07716.17;PF03131.19	bZIP_1;bZIP_2;bZIP_Maf	bZIP transcription factor;Basic region leucine zipper;bZIP Maf transcription factor
TraesCS5A02G143300	bZIP	5.60333	12.1233	1.11343	up	-	GO:0006355;GO:0045893;GO:0005634;GO:0003700;GO:000367	BP:regulation of transcription, DNA-templated;BP:positive regulation of transcription, DNA-templated;CC:nucleus;MF:transcription factor activity, sequence-specific DNA binding;MF:DNA binding;	------	------	------	------	ENOG410YEVN	K:Transcription	XP_037433709.1	basic leucine zipper 19-like [Triticum dicoccoides]	sp|Q6K3R9|BZP19_ORYSJ;	Basic leucine zipper 19 OS=Oryza sativa subsp. japonica OX=39947 GN=BZIP19 PE=2 SV=1;	PF00170.23;PF07716.17;PF03131.19	bZIP_1;bZIP_2;bZIP_Maf	bZIP transcription factor;Basic region leucine zipper;bZIP Maf transcription factor
TraesCS7B02G075600	bZIP	3.20333	1.00333	-1.67477	down	bZIP transcription factor, Positive regulator of ABA signaling, Drought toleranc [Source: Projected from Oryza sativa (Os06g0211200)]	GO:0009738;GO:0006355;GO:0045893;GO:0009414;GO:0009651;GO:0009789;GO:0005634;GO:0043565;GO:000370	BP:abscisic acid-activated signaling pathway;BP:regulation of transcription, DNA-templated;BP:positive regulation of transcription, DNA-templated;BP:response to water deprivation;BP:response to salt stress;BP:positive regulation of abscisic acid-activated signaling pathway;CC:nucleus;MF:sequence-specific DNA binding;MF:transcription factor activity, sequence-specific DNA binding;	K14432	ABF	map04075	Plant hormone signal transduction	ENOG410YFZJ	K:Transcription	XP_037466480.1	bZIP transcription factor 46-like [Triticum dicoccoides]	sp|Q69TW5|BZP46_ORYSJ;	bZIP transcription factor 46 OS=Oryza sativa subsp. japonica OX=39947 GN=BZIP46 PE=1 SV=1;	PF00170.23;PF07716.17;PF03131.19	bZIP_1;bZIP_2;bZIP_Maf	bZIP transcription factor;Basic region leucine zipper;bZIP Maf transcription factor
TraesCS6B02G318700	bZIP	1.91	0.73	-1.3876	down	-	GO:0006355;GO:000370	BP:regulation of transcription, DNA-templated;MF:transcription factor activity, sequence-specific DNA binding;	------	------	------	------	ENOG410YWTI	K:Transcription	KAF7085670.1	hypothetical protein CFC21_089072 [Triticum aestivum]	------	------	PF00170.23;PF07716.17;PF08537.12	bZIP_1;bZIP_2;NBP1	bZIP transcription factor;Basic region leucine zipper;Fungal Nap binding protein NBP1
TraesCS7B02G321300	bZIP	0.456667	1.43333	1.65016	up	-	GO:0006355;GO:000370	BP:regulation of transcription, DNA-templated;MF:transcription factor activity, sequence-specific DNA binding;	------	------	------	------	ENOG4111N0E	K:Transcription	KAF7103345.1	hypothetical protein CFC21_104339 [Triticum aestivum]	sp|Q8VY76|BZP19_ARATH;	Basic leucine zipper 19 OS=Arabidopsis thaliana OX=3702 GN=BZIP19 PE=2 SV=1;	PF07716.17;PF00170.23	bZIP_2;bZIP_1	Basic region leucine zipper;bZIP transcription factor
TraesCS3B02G261800	C3H	0.606667	1.3	1.09953	up	-	GO:0046872;GO:000367	MF:metal ion binding;MF:DNA binding;	------	------	------	------	COG5063	S:Function unknown	KAF7029940.1	hypothetical protein CFC21_041575 [Triticum aestivum]	sp|A2ZVY5|C3H9_ORYSJ;	Zinc finger CCCH domain-containing protein 9 OS=Oryza sativa subsp. japonica OX=39947 GN=Os01g0645000 PE=2 SV=1;	PF00642.26;PF18044.3	zf-CCCH;zf-CCCH_4	Zinc finger C-x8-C-x5-C-x3-H type;CCCH-type zinc finger
TraesCS3A02G107200	C3H	44.72	22.1367	-1.01448	down	TZF1 [Source:UniProtKB/TrEMBL;Acc:A0A0G3YJW9]	GO:0010150;GO:0009867;GO:0005634;GO:0046872;GO:000367	BP:leaf senescence;BP:jasmonic acid mediated signaling pathway;CC:nucleus;MF:metal ion binding;MF:DNA binding;	------	------	------	------	ENOG410XR0Z	S:Function unknown	XP_037404463.1	zinc finger CCCH domain-containing protein 2-like [Triticum dicoccoides]	sp|Q9FU27|C3H2_ORYSJ;	Zinc finger CCCH domain-containing protein 2 OS=Oryza sativa subsp. japonica OX=39947 GN=Os01g0192000 PE=2 SV=1;	PF00642.26;PF18044.3;PF18345.3	zf-CCCH;zf-CCCH_4;zf_CCCH_4	Zinc finger C-x8-C-x5-C-x3-H type;CCCH-type zinc finger;Zinc finger domain
TraesCS3D02G109300	C3H	104.223	50.82	-1.03621	down	-	GO:0010150;GO:0009867;GO:0005634;GO:0046872;GO:000367	BP:leaf senescence;BP:jasmonic acid mediated signaling pathway;CC:nucleus;MF:metal ion binding;MF:DNA binding;	------	------	------	------	ENOG410XR0Z	S:Function unknown	XP_020192020.1	zinc finger CCCH domain-containing protein 2 [Aegilops tauschii subsp. strangulata]	sp|Q9FU27|C3H2_ORYSJ;	Zinc finger CCCH domain-containing protein 2 OS=Oryza sativa subsp. japonica OX=39947 GN=Os01g0192000 PE=2 SV=1;	PF00642.26;PF18044.3;PF18345.3	zf-CCCH;zf-CCCH_4;zf_CCCH_4	Zinc finger C-x8-C-x5-C-x3-H type;CCCH-type zinc finger;Zinc finger domain
TraesCS7D02G220300	DBB	1.62667	3.98333	1.29206	up	-	GO:0005634;GO:0008270;GO:000551	CC:nucleus;MF:zinc ion binding;MF:protein binding;	------	------	------	------	ENOG410YA5C	S:Function unknown	XP_020150634.1	zinc finger protein CONSTANS-LIKE 9 isoform X1 [Aegilops tauschii subsp. strangulata]	sp|Q9SSE5|COL9_ARATH;	Zinc finger protein CONSTANS-LIKE 9 OS=Arabidopsis thaliana OX=3702 GN=COL9 PE=1 SV=1;	PF06203.16;PF00643.26	CCT;zf-B_box	CCT motif;B-box zinc finger
TraesCS7A02G218600	DBB	1.69667	3.80333	1.16456	up	-	GO:0005634;GO:0008270;GO:000551	CC:nucleus;MF:zinc ion binding;MF:protein binding;	------	------	------	------	ENOG410YA5C	S:Function unknown	XP_037460315.1	zinc finger protein CONSTANS-LIKE 9-like isoform X1 [Triticum dicoccoides]	sp|Q9SSE5|COL9_ARATH;	Zinc finger protein CONSTANS-LIKE 9 OS=Arabidopsis thaliana OX=3702 GN=COL9 PE=1 SV=1;	PF06203.16;PF00643.26	CCT;zf-B_box	CCT motif;B-box zinc finger
TraesCS6A02G150900	DBB	6.08	2.37667	-1.35513	down	-	GO:0005634;GO:0008270;GO:000551	CC:nucleus;MF:zinc ion binding;MF:protein binding;	------	------	------	------	COG5641	K:Transcription	KAF7078489.1	hypothetical protein CFC21_082914 [Triticum aestivum]	sp|O82117|CO3_ORYSJ;	Zinc finger protein CO3 OS=Oryza sativa subsp. japonica OX=39947 GN=CO3 PE=2 SV=1;	PF06203.16;PF00643.26	CCT;zf-B_box	CCT motif;B-box zinc finger
TraesCS6D02G140900	DBB	10.1833	2.65333	-1.94033	down	-	GO:0005634;GO:0008270;GO:000551	CC:nucleus;MF:zinc ion binding;MF:protein binding;	------	------	------	------	COG5641	K:Transcription	XP_020163882.1	zinc finger protein HD1 isoform X1 [Aegilops tauschii subsp. strangulata]	sp|O82117|CO3_ORYSJ;	Zinc finger protein CO3 OS=Oryza sativa subsp. japonica OX=39947 GN=CO3 PE=2 SV=1;	PF06203.16;PF00643.26	CCT;zf-B_box	CCT motif;B-box zinc finger
TraesCS6B02G179000	DBB	14.3	2.44	-2.55106	down	-	GO:0005634;GO:0008270;GO:000551	CC:nucleus;MF:zinc ion binding;MF:protein binding;	------	------	------	------	COG5641	K:Transcription	KAF7083951.1	hypothetical protein CFC21_087669 [Triticum aestivum]	sp|O82117|CO3_ORYSJ;	Zinc finger protein CO3 OS=Oryza sativa subsp. japonica OX=39947 GN=CO3 PE=2 SV=1;	PF06203.16;PF00643.26	CCT;zf-B_box	CCT motif;B-box zinc finger
TraesCS7B02G125500	DBB	0.81	2.3	1.50564	up	-	GO:0005634;GO:0005622;GO:000827	CC:nucleus;CC:intracellular;MF:zinc ion binding;	------	------	------	------	ENOG410YA5C	S:Function unknown	XP_037465784.1	zinc finger protein CONSTANS-LIKE 9-like isoform X1 [Triticum dicoccoides]	sp|Q9SSE5|COL9_ARATH;	Zinc finger protein CONSTANS-LIKE 9 OS=Arabidopsis thaliana OX=3702 GN=COL9 PE=1 SV=1;	PF00643.26	zf-B_box	B-box zinc finger
TraesCS6D02G199200	DBB	11.0433	4.41	-1.32433	down	-	GO:0006355;GO:0009640;GO:0005634;GO:0005622;GO:000827	BP:regulation of transcription, DNA-templated;BP:photomorphogenesis;CC:nucleus;CC:intracellular;MF:zinc ion binding;	------	------	------	------	ENOG410YBMW	S:Function unknown	XP_020173021.1	B-box zinc finger protein 25 [Aegilops tauschii subsp. strangulata]	sp|Q9SID1|BBX25_ARATH;	B-box zinc finger protein 25 OS=Arabidopsis thaliana OX=3702 GN=BBX25 PE=1 SV=2;	PF00643.26	zf-B_box	B-box zinc finger
TraesCS6A02G216400	DBB	2.22	0.786667	-1.49673	down	-	GO:0006355;GO:0009640;GO:0005634;GO:000827	BP:regulation of transcription, DNA-templated;BP:photomorphogenesis;CC:nucleus;MF:zinc ion binding;	------	------	------	------	ENOG410YBMW	S:Function unknown	XP_037447336.1	B-box zinc finger protein 25-like [Triticum dicoccoides]	sp|Q9SID1|BBX25_ARATH;	B-box zinc finger protein 25 OS=Arabidopsis thaliana OX=3702 GN=BBX25 PE=1 SV=2;	PF00643.26	zf-B_box	B-box zinc finger
TraesCS6B02G246500	DBB	6.90333	1.97333	-1.80666	down	-	GO:0006355;GO:0009640;GO:0005634;GO:0005622;GO:000827	BP:regulation of transcription, DNA-templated;BP:photomorphogenesis;CC:nucleus;CC:intracellular;MF:zinc ion binding;	------	------	------	------	ENOG410YBMW	S:Function unknown	XP_037454224.1	B-box zinc finger protein 25-like [Triticum dicoccoides]	sp|Q9SID1|BBX25_ARATH;	B-box zinc finger protein 25 OS=Arabidopsis thaliana OX=3702 GN=BBX25 PE=1 SV=2;	PF00643.26	zf-B_box	B-box zinc finger
TraesCS7A02G383400	DBB	3.15667	10.94	1.79314	up	-	GO:0006355;GO:0009640;GO:0005634;GO:000827	BP:regulation of transcription, DNA-templated;BP:photomorphogenesis;CC:nucleus;MF:zinc ion binding;	------	------	------	------	ENOG410YIAM	S:Function unknown	KAF7097023.1	hypothetical protein CFC21_098890 [Triticum aestivum]	sp|Q0IGM7|BBX20_ARATH;	B-box zinc finger protein 20 OS=Arabidopsis thaliana OX=3702 GN=BBX20 PE=1 SV=1;	PF00643.26;PF16366.7	zf-B_box;CEBP_ZZ	B-box zinc finger;Cytoplasmic polyadenylation element-binding protein ZZ domain
TraesCS7D02G379900	DBB	4.07	10.3333	1.3442	up	-	GO:0006355;GO:0009640;GO:0005634;GO:0005622;GO:000827	BP:regulation of transcription, DNA-templated;BP:photomorphogenesis;CC:nucleus;CC:intracellular;MF:zinc ion binding;	------	------	------	------	ENOG410YIAM	S:Function unknown	XP_020146276.1	B-box zinc finger protein 20 [Aegilops tauschii subsp. strangulata]	sp|Q9LQZ7|BBX21_ARATH;	B-box zinc finger protein 21 OS=Arabidopsis thaliana OX=3702 GN=BBX21 PE=1 SV=1;	PF00643.26;PF16366.7	zf-B_box;CEBP_ZZ	B-box zinc finger;Cytoplasmic polyadenylation element-binding protein ZZ domain
TraesCS5B02G317700	DBB	18.33	8.15	-1.16933	down	-	GO:0006355;GO:0009640;GO:0005634;GO:0005622;GO:000827	BP:regulation of transcription, DNA-templated;BP:photomorphogenesis;CC:nucleus;CC:intracellular;MF:zinc ion binding;	------	------	------	------	ENOG410Y2NN	S:Function unknown	KAF7064386.1	hypothetical protein CFC21_070715 [Triticum aestivum]	sp|C0SVM5|BBX19_ARATH;	B-box zinc finger protein 19 OS=Arabidopsis thaliana OX=3702 GN=BBX19 PE=1 SV=1;	PF00643.26;PF16366.7	zf-B_box;CEBP_ZZ	B-box zinc finger;Cytoplasmic polyadenylation element-binding protein ZZ domain
TraesCS5D02G323400	DBB	29.93	12.91	-1.2131	down	-	GO:0006355;GO:0009640;GO:0005634;GO:0005622;GO:000827	BP:regulation of transcription, DNA-templated;BP:photomorphogenesis;CC:nucleus;CC:intracellular;MF:zinc ion binding;	------	------	------	------	ENOG410Y2NN	S:Function unknown	XP_020148445.1	B-box zinc finger protein 18 [Aegilops tauschii subsp. strangulata]	sp|C0SVM5|BBX19_ARATH;	B-box zinc finger protein 19 OS=Arabidopsis thaliana OX=3702 GN=BBX19 PE=1 SV=1;	PF00643.26;PF16366.7	zf-B_box;CEBP_ZZ	B-box zinc finger;Cytoplasmic polyadenylation element-binding protein ZZ domain
TraesCS7A02G213400	Dof	0.246667	0.773333	1.64853	up	-	GO:0006355;GO:0005634;GO:000367	BP:regulation of transcription, DNA-templated;CC:nucleus;MF:DNA binding;	------	------	------	------	ENOG410YQE9	S:Function unknown	XP_037456774.1	dof zinc finger protein 4-like [Triticum dicoccoides]	sp|Q6Z345|DOF4_ORYSJ;	Dof zinc finger protein 4 OS=Oryza sativa subsp. japonica OX=39947 GN=DOF4 PE=2 SV=1;	PF02701.17	zf-Dof	Dof domain, zinc finger
TraesCS1A02G334100	Dof	1.81333	3.77667	1.05847	up	-	GO:0006355;GO:0005634;GO:0003700;GO:0008270;GO:000367	BP:regulation of transcription, DNA-templated;CC:nucleus;MF:transcription factor activity, sequence-specific DNA binding;MF:zinc ion binding;MF:DNA binding;	------	------	------	------	ENOG4111AMA;ENOG41103PE	S:Function unknown;	XP_037450888.1	dof zinc finger protein 5-like [Triticum dicoccoides]	sp|Q5JLR7|DOF5_ORYSJ;	Dof zinc finger protein 5 OS=Oryza sativa subsp. japonica OX=39947 GN=DOF5 PE=2 SV=1;	PF02701.17	zf-Dof	Dof domain, zinc finger
TraesCS6D02G268400	Dof	6.60667	3.1	-1.09165	down	-	GO:0006355;GO:0005634;GO:000367	BP:regulation of transcription, DNA-templated;CC:nucleus;MF:DNA binding;	------	------	------	------	ENOG410YQE9	S:Function unknown	XP_020175561.1	dof zinc finger protein 4 [Aegilops tauschii subsp. strangulata]	sp|Q6Z345|DOF4_ORYSJ;	Dof zinc finger protein 4 OS=Oryza sativa subsp. japonica OX=39947 GN=DOF4 PE=2 SV=1;	PF02701.17	zf-Dof	Dof domain, zinc finger
TraesCS4B02G286400	Dof	6.21	2.81667	-1.1406	down	-	GO:0006355;GO:0005634;GO:0003700;GO:000367	BP:regulation of transcription, DNA-templated;CC:nucleus;MF:transcription factor activity, sequence-specific DNA binding;MF:DNA binding;	------	------	------	------	ENOG410YN7N	S:Function unknown	XP_037426235.1	cyclic dof factor 1-like [Triticum dicoccoides]	sp|Q8W1E3|CDF1_ARATH;	Cyclic dof factor 1 OS=Arabidopsis thaliana OX=3702 GN=CDF1 PE=1 SV=2;	PF02701.17	zf-Dof	Dof domain, zinc finger
TraesCS2D02G100300	Dof	12.3267	5.37333	-1.19789	down	-	GO:0006355;GO:0005634;GO:0003700;GO:000367	BP:regulation of transcription, DNA-templated;CC:nucleus;MF:transcription factor activity, sequence-specific DNA binding;MF:DNA binding;	------	------	------	------	ENOG410YN7N	S:Function unknown	KAF7013982.1	hypothetical protein CFC21_028019 [Triticum aestivum]	sp|Q93ZL5|CDF2_ARATH;	Cyclic dof factor 2 OS=Arabidopsis thaliana OX=3702 GN=CDF2 PE=1 SV=2;	PF02701.17	zf-Dof	Dof domain, zinc finger
TraesCS2B02G118000	Dof	10.1133	3.81	-1.4084	down	-	GO:0006355;GO:0005634;GO:0003700;GO:000367	BP:regulation of transcription, DNA-templated;CC:nucleus;MF:transcription factor activity, sequence-specific DNA binding;MF:DNA binding;	------	------	------	------	ENOG410YN7N	S:Function unknown	XP_037483461.1	cyclic dof factor 1-like [Triticum dicoccoides]	sp|Q93ZL5|CDF2_ARATH;	Cyclic dof factor 2 OS=Arabidopsis thaliana OX=3702 GN=CDF2 PE=1 SV=2;	PF02701.17	zf-Dof	Dof domain, zinc finger
TraesCS3A02G180600	Dof	1.56333	0.573333	-1.44718	down	-	GO:0006355;GO:0005634;GO:0003700;GO:000367	BP:regulation of transcription, DNA-templated;CC:nucleus;MF:transcription factor activity, sequence-specific DNA binding;MF:DNA binding;	------	------	------	------	ENOG410YN7N	S:Function unknown	XP_037405270.1	cyclic dof factor 2-like [Triticum dicoccoides]	sp|Q93ZL5|CDF2_ARATH;	Cyclic dof factor 2 OS=Arabidopsis thaliana OX=3702 GN=CDF2 PE=1 SV=2;	PF02701.17	zf-Dof	Dof domain, zinc finger
TraesCS2A02G100800	Dof	10.39	3.67667	-1.49873	down	-	GO:0006355;GO:0005634;GO:0003700;GO:000367	BP:regulation of transcription, DNA-templated;CC:nucleus;MF:transcription factor activity, sequence-specific DNA binding;MF:DNA binding;	------	------	------	------	ENOG410YN7N	S:Function unknown	XP_020181996.1	cyclic dof factor 1 isoform X1 [Aegilops tauschii subsp. strangulata]	sp|Q93ZL5|CDF2_ARATH;	Cyclic dof factor 2 OS=Arabidopsis thaliana OX=3702 GN=CDF2 PE=1 SV=2;	PF02701.17	zf-Dof	Dof domain, zinc finger
TraesCS4D02G285100	Dof	9.52333	3.27333	-1.54071	down	-	GO:0006355;GO:0005634;GO:0003700;GO:000367	BP:regulation of transcription, DNA-templated;CC:nucleus;MF:transcription factor activity, sequence-specific DNA binding;MF:DNA binding;	------	------	------	------	ENOG410YN7N	S:Function unknown	XP_020166390.1	cyclic dof factor 1 [Aegilops tauschii subsp. strangulata]	sp|Q8W1E3|CDF1_ARATH;	Cyclic dof factor 1 OS=Arabidopsis thaliana OX=3702 GN=CDF1 PE=1 SV=2;	PF02701.17	zf-Dof	Dof domain, zinc finger
TraesCS5A02G401800	Dof	1.38	0.42	-1.71621	down	-	GO:0006355;GO:0005634;GO:000367	BP:regulation of transcription, DNA-templated;CC:nucleus;MF:DNA binding;	------	------	------	------	ENOG410YH3K	S:Function unknown	KAF7061079.1	hypothetical protein CFC21_067808 [Triticum aestivum]	sp|Q8L9V6|DOF11_ARATH;	Dof zinc finger protein DOF1.1 OS=Arabidopsis thaliana OX=3702 GN=DOF1.1 PE=1 SV=2;	PF02701.17	zf-Dof	Dof domain, zinc finger
TraesCS4A02G017700	Dof	9.57667	2.80333	-1.77238	down	-	GO:0006355;GO:0005634;GO:0003700;GO:000367	BP:regulation of transcription, DNA-templated;CC:nucleus;MF:transcription factor activity, sequence-specific DNA binding;MF:DNA binding;	------	------	------	------	ENOG410YN7N	S:Function unknown	KAF7041128.1	hypothetical protein CFC21_050958 [Triticum aestivum]	sp|Q8W1E3|CDF1_ARATH;	Cyclic dof factor 1 OS=Arabidopsis thaliana OX=3702 GN=CDF1 PE=1 SV=2;	PF02701.17	zf-Dof	Dof domain, zinc finger
TraesCS3B02G210300	Dof	2.10333	0.613333	-1.77793	down	-	GO:0006355;GO:0005634;GO:0003700;GO:000367	BP:regulation of transcription, DNA-templated;CC:nucleus;MF:transcription factor activity, sequence-specific DNA binding;MF:DNA binding;	------	------	------	------	ENOG410YN7N	S:Function unknown	KAF7029217.1	hypothetical protein CFC21_041022 [Triticum aestivum]	sp|Q93ZL5|CDF2_ARATH;	Cyclic dof factor 2 OS=Arabidopsis thaliana OX=3702 GN=CDF2 PE=1 SV=2;	PF02701.17	zf-Dof	Dof domain, zinc finger
TraesCS3D02G390000	EIL	1.84	0.906667	-1.02106	down	-	GO:0009873;GO:0005634;GO:0003700;GO:000367	BP:ethylene-activated signaling pathway;CC:nucleus;MF:transcription factor activity, sequence-specific DNA binding;MF:DNA binding;	K14514	EIN3	map04016;map04075	MAPK signaling pathway - plant;Plant hormone signal transduction	ENOG41107DU	S:Function unknown	XP_020197833.1	ETHYLENE INSENSITIVE 3-like 5 protein [Aegilops tauschii subsp. strangulata]	sp|Q9FJQ5|EIL5_ARATH;	ETHYLENE INSENSITIVE 3-like 5 protein OS=Arabidopsis thaliana OX=3702 GN=EIL5 PE=2 SV=1;	PF04873.15;PF11001.10	EIN3;DUF2841	Ethylene insensitive 3;Protein of unknown function
TraesCS1A02G293400	FAR1	2.63	1.13667	-1.21025	down	-	------	------	------	------	------	------	ENOG41107AZ	S:Function unknown	KAF6985125.1	hypothetical protein CFC21_003021 [Triticum aestivum]	------	------	------	------	------
TraesCS1D02G389100	FAR1	58.04	18.5733	-1.64381	down	-	------	------	------	------	------	------	ENOG41106KF	S:Function unknown	KAF6997403.1	hypothetical protein CFC21_013622 [Triticum aestivum]	------	------	------	------	------
TraesCS1D02G223200	GATA	1.54	4.02667	1.38666	up	GATA transcription factor [Source:UniProtKB/TrEMBL;Acc:A0A1D5SRH8]	GO:0030154;GO:0006355;GO:0045893;GO:0005634;GO:0043565;GO:0003700;GO:000827	BP:cell differentiation;BP:regulation of transcription, DNA-templated;BP:positive regulation of transcription, DNA-templated;CC:nucleus;MF:sequence-specific DNA binding;MF:transcription factor activity, sequence-specific DNA binding;MF:zinc ion binding;	------	------	------	------	COG5641	K:Transcription	KAF6995457.1	hypothetical protein CFC21_011954 [Triticum aestivum]	sp|O49743|GATA4_ARATH;	GATA transcription factor 4 OS=Arabidopsis thaliana OX=3702 GN=GATA4 PE=2 SV=1;	PF00320.29	GATA	GATA zinc finger
TraesCS1B02G234800	GATA	2.13	5.33333	1.32418	up	GATA transcription factor [Source:UniProtKB/TrEMBL;Acc:A0A1D5SAU4]	GO:0030154;GO:0006355;GO:0045893;GO:0005634;GO:0043565;GO:0003700;GO:000827	BP:cell differentiation;BP:regulation of transcription, DNA-templated;BP:positive regulation of transcription, DNA-templated;CC:nucleus;MF:sequence-specific DNA binding;MF:transcription factor activity, sequence-specific DNA binding;MF:zinc ion binding;	------	------	------	------	COG5641	K:Transcription	VAH18228.1	unnamed protein product [Triticum turgidum subsp. durum]	sp|O49743|GATA4_ARATH;	GATA transcription factor 4 OS=Arabidopsis thaliana OX=3702 GN=GATA4 PE=2 SV=1;	PF00320.29	GATA	GATA zinc finger
TraesCS1A02G221600	GATA	1.57	3.77667	1.26635	up	GATA transcription factor [Source:UniProtKB/TrEMBL;Acc:A0A1D5RW78]	GO:0030154;GO:0006355;GO:0045893;GO:0005634;GO:0043565;GO:0003700;GO:000827	BP:cell differentiation;BP:regulation of transcription, DNA-templated;BP:positive regulation of transcription, DNA-templated;CC:nucleus;MF:sequence-specific DNA binding;MF:transcription factor activity, sequence-specific DNA binding;MF:zinc ion binding;	------	------	------	------	COG5641	K:Transcription	KAF6984264.1	hypothetical protein CFC21_002302 [Triticum aestivum]	sp|O49743|GATA4_ARATH;	GATA transcription factor 4 OS=Arabidopsis thaliana OX=3702 GN=GATA4 PE=2 SV=1;	PF00320.29	GATA	GATA zinc finger
TraesCS6D02G153000	GRAS	0.796667	1.65667	1.05623	up	-	------	------	------	------	------	------	ENOG410YAHS	K:Transcription	XP_020196668.1	protein MONOCULM 1 [Aegilops tauschii subsp. strangulata]	sp|Q84MM9|MOC_ORYSJ;	Protein MONOCULM 1 OS=Oryza sativa subsp. japonica OX=39947 GN=MOC1 PE=2 SV=1;	PF03514.16	GRAS	GRAS domain family
TraesCS2D02G199200	HB-other	2.26	0.913333	-1.30711	down	-	GO:0006355;GO:0006357;GO:0045893;GO:0005634;GO:0043565;GO:0003677;GO:000098	BP:regulation of transcription, DNA-templated;BP:regulation of transcription from RNA polymerase II promoter;BP:positive regulation of transcription, DNA-templated;CC:nucleus;MF:sequence-specific DNA binding;MF:DNA binding;MF:RNA polymerase II transcription factor activity, sequence-specific DNA binding;	K09338	HD-ZIP	------	------	ENOG410Z2UE	K:Transcription	XP_020155462.1	homeobox-leucine zipper protein HOX14 [Aegilops tauschii subsp. strangulata]	sp|Q7XI85|HOX14_ORYSJ;	Homeobox-leucine zipper protein HOX14 OS=Oryza sativa subsp. japonica OX=39947 GN=HOX14 PE=2 SV=1;	PF00046.31	Homeodomain	Homeodomain
TraesCS1A02G372900	HB-other	1.65333	0.773333	-1.09622	down	-	GO:0006355;GO:0005634;GO:0043565;GO:0003700;GO:0003677;GO:000098	BP:regulation of transcription, DNA-templated;CC:nucleus;MF:sequence-specific DNA binding;MF:transcription factor activity, sequence-specific DNA binding;MF:DNA binding;MF:RNA polymerase II transcription factor activity, sequence-specific DNA binding;	------	------	------	------	ENOG410Z2UE	K:Transcription	KAF6986023.1	hypothetical protein CFC21_003820 [Triticum aestivum]	sp|A2X674|HOX7_ORYSI;	Homeobox-leucine zipper protein HOX7 OS=Oryza sativa subsp. indica OX=39946 GN=HOX7 PE=1 SV=2;	PF00046.31;PF02183.20	Homeodomain;HALZ	Homeodomain;Homeobox associated leucine zipper
TraesCS2A02G389400	HB-other	2.99667	0.89	-1.75148	down	Similar to Homeobox-leucine zipper protein HOX22 [Source: Projected from Oryza sativa (Os04g0541700)]	GO:0006355;GO:0006357;GO:0045893;GO:0005634;GO:0043565;GO:0003700;GO:0003677;GO:000098	BP:regulation of transcription, DNA-templated;BP:regulation of transcription from RNA polymerase II promoter;BP:positive regulation of transcription, DNA-templated;CC:nucleus;MF:sequence-specific DNA binding;MF:transcription factor activity, sequence-specific DNA binding;MF:DNA binding;MF:RNA polymerase II transcription factor activity, sequence-specific DNA binding;	------	------	------	------	ENOG410Z2UE	K:Transcription	KAF7002819.1	hypothetical protein CFC21_018244, partial [Triticum aestivum]	sp|Q01IK0|HOX22_ORYSI;	Homeobox-leucine zipper protein HOX22 OS=Oryza sativa subsp. indica OX=39946 GN=HOX22 PE=2 SV=2;	PF00046.31;PF02183.20;PF05920.13	Homeodomain;HALZ;Homeobox_KN	Homeodomain;Homeobox associated leucine zipper;Homeobox KN domain
TraesCS2B02G407600	HB-other	0.776667	0.14	-2.47187	down	Similar to Homeobox-leucine zipper protein HOX22 [Source: Projected from Oryza sativa (Os04g0541700)]	GO:0006355;GO:0005634;GO:0043565;GO:0003700;GO:0003677;GO:000098	BP:regulation of transcription, DNA-templated;CC:nucleus;MF:sequence-specific DNA binding;MF:transcription factor activity, sequence-specific DNA binding;MF:DNA binding;MF:RNA polymerase II transcription factor activity, sequence-specific DNA binding;	------	------	------	------	ENOG410Z2UE	K:Transcription	KAF7010242.1	hypothetical protein CFC21_024677 [Triticum aestivum]	sp|Q01IK0|HOX22_ORYSI;	Homeobox-leucine zipper protein HOX22 OS=Oryza sativa subsp. indica OX=39946 GN=HOX22 PE=2 SV=2;	PF00046.31;PF02183.20;PF05920.13	Homeodomain;HALZ;Homeobox_KN	Homeodomain;Homeobox associated leucine zipper;Homeobox KN domain
TraesCS2D02G387300	HB-other	4.01333	0.65	-2.62629	down	Similar to Homeobox-leucine zipper protein HOX22 [Source: Projected from Oryza sativa (Os04g0541700)]	GO:0006355;GO:0045893;GO:0005634;GO:0043565;GO:0003677;GO:000098	BP:regulation of transcription, DNA-templated;BP:positive regulation of transcription, DNA-templated;CC:nucleus;MF:sequence-specific DNA binding;MF:DNA binding;MF:RNA polymerase II transcription factor activity, sequence-specific DNA binding;	------	------	------	------	ENOG410Z2UE	K:Transcription	XP_020200397.1	homeobox-leucine zipper protein HOX22 [Aegilops tauschii subsp. strangulata]	sp|Q01IK0|HOX22_ORYSI;	Homeobox-leucine zipper protein HOX22 OS=Oryza sativa subsp. indica OX=39946 GN=HOX22 PE=2 SV=2;	PF00046.31;PF02183.20;PF05920.13	Homeodomain;HALZ;Homeobox_KN	Homeodomain;Homeobox associated leucine zipper;Homeobox KN domain
TraesCS6B02G284300	HB-other	0.853333	0.173333	-2.29956	down	HOX1 [Source:UniProtKB/TrEMBL;Acc:M9PJT6]	GO:0006355;GO:0006357;GO:0045893;GO:0005634;GO:0043565;GO:0003700;GO:0003677;GO:000098	BP:regulation of transcription, DNA-templated;BP:regulation of transcription from RNA polymerase II promoter;BP:positive regulation of transcription, DNA-templated;CC:nucleus;MF:sequence-specific DNA binding;MF:transcription factor activity, sequence-specific DNA binding;MF:DNA binding;MF:RNA polymerase II transcription factor activity, sequence-specific DNA binding;	------	------	------	------	ENOG410Z2UE	K:Transcription	XP_037456291.1	homeobox-leucine zipper protein HOX24-like [Triticum dicoccoides]	sp|A2X7U1|HOX24_ORYSI;	Homeobox-leucine zipper protein HOX24 OS=Oryza sativa subsp. indica OX=39946 GN=HOX24 PE=2 SV=2;	PF00046.31;PF02183.20;PF05920.13;PF01025.21	Homeodomain;HALZ;Homeobox_KN;GrpE	Homeodomain;Homeobox associated leucine zipper;Homeobox KN domain;GrpE
TraesCS5A02G514700	HB-other	0.083333	0.366667	2.13751	up	-	GO:0006355;GO:0006357;GO:0005634;GO:0003677;GO:0000978;GO:000098	BP:regulation of transcription, DNA-templated;BP:regulation of transcription from RNA polymerase II promoter;CC:nucleus;MF:DNA binding;MF:RNA polymerase II core promoter proximal region sequence-specific DNA binding;MF:RNA polymerase II transcription factor activity, sequence-specific DNA binding;	------	------	------	------	ENOG410XPMQ	K:Transcription	KAF7062355.1	hypothetical protein CFC21_068964 [Triticum aestivum]	sp|Q38897|BEL1_ARATH;	Homeobox protein BEL1 homolog OS=Arabidopsis thaliana OX=3702 GN=BEL1 PE=1 SV=2;	PF07526.13;PF05920.13;PF00046.31	POX;Homeobox_KN;Homeodomain	Associated with HOX;Homeobox KN domain;Homeodomain
TraesCS4D02G340700	HB-other	0.18	0.696667	1.95247	up	-	GO:0006355;GO:0005634;GO:000367	BP:regulation of transcription, DNA-templated;CC:nucleus;MF:DNA binding;	------	------	------	------	ENOG410XPMQ	K:Transcription	KAF7055980.1	hypothetical protein CFC21_063444 [Triticum aestivum]	sp|Q38897|BEL1_ARATH;	Homeobox protein BEL1 homolog OS=Arabidopsis thaliana OX=3702 GN=BEL1 PE=1 SV=2;	PF07526.13;PF05920.13;PF00046.31	POX;Homeobox_KN;Homeodomain	Associated with HOX;Homeobox KN domain;Homeodomain
TraesCS4B02G345600	HB-other	0.166667	0.623333	1.90303	up	-	GO:0006355;GO:0005634;GO:000367	BP:regulation of transcription, DNA-templated;CC:nucleus;MF:DNA binding;	------	------	------	------	ENOG410XPMQ	K:Transcription	KAF7051123.1	hypothetical protein CFC21_059399 [Triticum aestivum]	sp|Q38897|BEL1_ARATH;	Homeobox protein BEL1 homolog OS=Arabidopsis thaliana OX=3702 GN=BEL1 PE=1 SV=2;	PF07526.13;PF05920.13;PF00046.31	POX;Homeobox_KN;Homeodomain	Associated with HOX;Homeobox KN domain;Homeodomain
TraesCS4D02G111900	HB-other	1.45667	3.11667	1.09733	up	-	GO:0006355;GO:0005634;GO:000367	BP:regulation of transcription, DNA-templated;CC:nucleus;MF:DNA binding;	------	------	------	------	ENOG410XPMQ	K:Transcription	XP_020178285.1	BEL1-like homeodomain protein 1 [Aegilops tauschii subsp. strangulata]	sp|Q9SJ56|BLH1_ARATH;	BEL1-like homeodomain protein 1 OS=Arabidopsis thaliana OX=3702 GN=BLH1 PE=1 SV=1;	PF07526.13;PF05920.13;PF00046.31	POX;Homeobox_KN;Homeodomain	Associated with HOX;Homeobox KN domain;Homeodomain
TraesCS4A02G200800	HB-other	1.33333	2.83	1.08576	up	-	GO:0006355;GO:0005634;GO:000367	BP:regulation of transcription, DNA-templated;CC:nucleus;MF:DNA binding;	------	------	------	------	ENOG410XPMQ	K:Transcription	XP_037421612.1	BEL1-like homeodomain protein 1 [Triticum dicoccoides]	sp|Q9SJ56|BLH1_ARATH;	BEL1-like homeodomain protein 1 OS=Arabidopsis thaliana OX=3702 GN=BLH1 PE=1 SV=1;	PF07526.13;PF05920.13;PF00046.31	POX;Homeobox_KN;Homeodomain	Associated with HOX;Homeobox KN domain;Homeodomain
TraesCS3B02G568300	HSF	2.05333	4.82333	1.23206	up	-	GO:0006355;GO:0006357;GO:0034605;GO:0005634;GO:0043565;GO:0003700;GO:0003677;GO:000097	BP:regulation of transcription, DNA-templated;BP:regulation of transcription from RNA polymerase II promoter;BP:cellular response to heat;CC:nucleus;MF:sequence-specific DNA binding;MF:transcription factor activity, sequence-specific DNA binding;MF:DNA binding;MF:RNA polymerase II core promoter proximal region sequence-specific DNA binding;	K09419	HSFF	------	------	COG5169	K:Transcription	KAF7033550.1	hypothetical protein CFC21_044633 [Triticum aestivum]	sp|Q0DBL6|HFC2B_ORYSJ;	Heat stress transcription factor C-2b OS=Oryza sativa subsp. japonica OX=39947 GN=HSFC2B PE=3 SV=1;	PF00447.19	HSF_DNA-bind	HSF-type DNA-binding
TraesCS5B02G440700	HSF	4.92667	2.21667	-1.15222	down	Heat stress transcriptioon factor, High-temperature stress tolerance, Tolerance to environmental stresse [Source: Projected from Oryza sativa (Os03g0795900)]	GO:0006355;GO:0006357;GO:0034605;GO:0005634;GO:0043565;GO:0003700;GO:000097	BP:regulation of transcription, DNA-templated;BP:regulation of transcription from RNA polymerase II promoter;BP:cellular response to heat;CC:nucleus;MF:sequence-specific DNA binding;MF:transcription factor activity, sequence-specific DNA binding;MF:RNA polymerase II core promoter proximal region sequence-specific DNA binding;	K09419	HSFF	------	------	COG5169	K:Transcription	KAF7068193.1	hypothetical protein CFC21_073970 [Triticum aestivum]	sp|Q6F388|HFA2E_ORYSJ;	Heat stress transcription factor A-2e OS=Oryza sativa subsp. japonica OX=39947 GN=HSFA2E PE=2 SV=1;	PF00447.19	HSF_DNA-bind	HSF-type DNA-binding
TraesCS5B02G236400	HSF	7.67	3.11333	-1.30077	down	Similar to Heat stress transcription factor Spl7 (Heat shock transcription factor) (Heat shock factor RHSF10) [Source: Projected from Oryza sativa (Os09g0456800)]	GO:0006355;GO:0006357;GO:0045892;GO:0009408;GO:0005737;GO:0005634;GO:0043565;GO:0003700;GO:0003677;GO:000097	BP:regulation of transcription, DNA-templated;BP:regulation of transcription from RNA polymerase II promoter;BP:negative regulation of transcription, DNA-templated;BP:response to heat;CC:cytoplasm;CC:nucleus;MF:sequence-specific DNA binding;MF:transcription factor activity, sequence-specific DNA binding;MF:DNA binding;MF:RNA polymerase II core promoter proximal region sequence-specific DNA bindin…	K09419	HSFF	------	------	COG5169	K:Transcription	KAF7065834.1	hypothetical protein CFC21_071904 [Triticum aestivum]	sp|Q67TP9|HSFB1_ORYSJ;	Heat stress transcription factor B-1 OS=Oryza sativa subsp. japonica OX=39947 GN=HSFB1 PE=2 SV=1;	PF00447.19	HSF_DNA-bind	HSF-type DNA-binding
TraesCS5A02G237900	HSF	25.4067	10.0633	-1.3361	down	Similar to Heat stress transcription factor Spl7 (Heat shock transcription factor) (Heat shock factor RHSF10) [Source: Projected from Oryza sativa (Os09g0456800)]	GO:0006355;GO:0006357;GO:0045892;GO:0009408;GO:0005737;GO:0005634;GO:0043565;GO:0003700;GO:000097	BP:regulation of transcription, DNA-templated;BP:regulation of transcription from RNA polymerase II promoter;BP:negative regulation of transcription, DNA-templated;BP:response to heat;CC:cytoplasm;CC:nucleus;MF:sequence-specific DNA binding;MF:transcription factor activity, sequence-specific DNA binding;MF:RNA polymerase II core promoter proximal region sequence-specific DNA binding;	K09419	HSFF	------	------	COG5169	K:Transcription	XP_037434695.1	heat stress transcription factor B-1-like [Triticum dicoccoides]	sp|Q67TP9|HSFB1_ORYSJ;	Heat stress transcription factor B-1 OS=Oryza sativa subsp. japonica OX=39947 GN=HSFB1 PE=2 SV=1;	PF00447.19	HSF_DNA-bind	HSF-type DNA-binding
TraesCS5D02G244800	HSF	10.4467	4.01667	-1.37897	down	Similar to Heat stress transcription factor Spl7 (Heat shock transcription factor) (Heat shock factor RHSF10) [Source: Projected from Oryza sativa (Os09g0456800)]	GO:0006355;GO:0006357;GO:0045892;GO:0009408;GO:0005737;GO:0005634;GO:0043565;GO:0003700;GO:000097	BP:regulation of transcription, DNA-templated;BP:regulation of transcription from RNA polymerase II promoter;BP:negative regulation of transcription, DNA-templated;BP:response to heat;CC:cytoplasm;CC:nucleus;MF:sequence-specific DNA binding;MF:transcription factor activity, sequence-specific DNA binding;MF:RNA polymerase II core promoter proximal region sequence-specific DNA binding;	K09419	HSFF	------	------	COG5169	K:Transcription	XP_020177659.1	heat stress transcription factor B-1 [Aegilops tauschii subsp. strangulata]	sp|Q67TP9|HSFB1_ORYSJ;	Heat stress transcription factor B-1 OS=Oryza sativa subsp. japonica OX=39947 GN=HSFB1 PE=2 SV=1;	PF00447.19	HSF_DNA-bind	HSF-type DNA-binding
TraesCS5D02G321000	HSF	27.9067	9.74667	-1.51763	down	Similar to Isoform 2 of Heat stress transcription factor B-2c [Source: Projected from Oryza sativa (Os09g0526600)]	GO:0006355;GO:0006357;GO:0005634;GO:0016021;GO:0043565;GO:0003700;GO:000097	BP:regulation of transcription, DNA-templated;BP:regulation of transcription from RNA polymerase II promoter;CC:nucleus;CC:integral component of membrane;MF:sequence-specific DNA binding;MF:transcription factor activity, sequence-specific DNA binding;MF:RNA polymerase II core promoter proximal region sequence-specific DNA binding;	K09419	HSFF	------	------	COG5169	K:Transcription	KAF7073763.1	hypothetical protein CFC21_078708 [Triticum aestivum]	sp|Q652B0|HFB2C_ORYSJ;	Heat stress transcription factor B-2c OS=Oryza sativa subsp. japonica OX=39947 GN=HSFB2C PE=2 SV=1;	PF00447.19	HSF_DNA-bind	HSF-type DNA-binding
TraesCS5D02G445100	HSF	6.68	2.14	-1.64224	down	Heat stress transcriptioon factor, High-temperature stress tolerance, Tolerance to environmental stresse [Source: Projected from Oryza sativa (Os03g0795900)]	GO:0006355;GO:0006357;GO:0034605;GO:0005634;GO:0043565;GO:0003700;GO:000097	BP:regulation of transcription, DNA-templated;BP:regulation of transcription from RNA polymerase II promoter;BP:cellular response to heat;CC:nucleus;MF:sequence-specific DNA binding;MF:transcription factor activity, sequence-specific DNA binding;MF:RNA polymerase II core promoter proximal region sequence-specific DNA binding;	K09419	HSFF	------	------	COG5169	K:Transcription	QLI63287.1	heat shock transcription factor HsfA2-3 [Triticum aestivum]	sp|Q6F388|HFA2E_ORYSJ;	Heat stress transcription factor A-2e OS=Oryza sativa subsp. japonica OX=39947 GN=HSFA2E PE=2 SV=1;	PF00447.19	HSF_DNA-bind	HSF-type DNA-binding
TraesCS5A02G314700	HSF	42.3933	13.5	-1.65088	down	Similar to Isoform 2 of Heat stress transcription factor B-2c [Source: Projected from Oryza sativa (Os09g0526600)]	GO:0006355;GO:0006357;GO:0005634;GO:0016021;GO:0043565;GO:0003700;GO:000097	BP:regulation of transcription, DNA-templated;BP:regulation of transcription from RNA polymerase II promoter;CC:nucleus;CC:integral component of membrane;MF:sequence-specific DNA binding;MF:transcription factor activity, sequence-specific DNA binding;MF:RNA polymerase II core promoter proximal region sequence-specific DNA binding;	K09419	HSFF	------	------	COG5169	K:Transcription	KAF7060072.1	hypothetical protein CFC21_066892 [Triticum aestivum]	sp|Q652B0|HFB2C_ORYSJ;	Heat stress transcription factor B-2c OS=Oryza sativa subsp. japonica OX=39947 GN=HSFB2C PE=2 SV=1;	PF00447.19	HSF_DNA-bind	HSF-type DNA-binding
TraesCS5B02G315600	HSF	21.4367	6.38667	-1.74695	down	Similar to Isoform 2 of Heat stress transcription factor B-2c [Source: Projected from Oryza sativa (Os09g0526600)]	GO:0006355;GO:0006357;GO:0016021;GO:0005634;GO:0043565;GO:0003700;GO:000097	BP:regulation of transcription, DNA-templated;BP:regulation of transcription from RNA polymerase II promoter;CC:integral component of membrane;CC:nucleus;MF:sequence-specific DNA binding;MF:transcription factor activity, sequence-specific DNA binding;MF:RNA polymerase II core promoter proximal region sequence-specific DNA binding;	K09419	HSFF	------	------	COG5169	K:Transcription	KAF7066786.1	hypothetical protein CFC21_072723 [Triticum aestivum]	sp|Q6Z9C8|HFB2B_ORYSJ;	Heat stress transcription factor B-2b OS=Oryza sativa subsp. japonica OX=39947 GN=HSFB2B PE=2 SV=1;	PF00447.19	HSF_DNA-bind	HSF-type DNA-binding
TraesCS4A02G027700	HSF	8.16	2.38333	-1.77559	down	-	GO:0006355;GO:0006357;GO:0009086;GO:0034605;GO:0005634;GO:0043565;GO:0010309;GO:0003700;GO:0003677;GO:000097	BP:regulation of transcription, DNA-templated;BP:regulation of transcription from RNA polymerase II promoter;BP:methionine biosynthetic process;BP:cellular response to heat;CC:nucleus;MF:sequence-specific DNA binding;MF:acireductone dioxygenase [iro;MF:transcription factor activity, sequence-specific DNA binding;MF:DNA binding;MF:RNA polymerase II core promoter proximal region sequence-specific D…	K09419;K08967	HSFF;mtnD, mtnZ, ADI1	map00270	Cysteine and methionine metabolism	COG5169;COG1791	K:Transcription;S:Function unknown	XP_037418839.1	uncharacterized protein LOC119283368 [Triticum dicoccoides]	sp|Q8H7Y6|HFA2D_ORYSJ;	Heat stress transcription factor A-2d OS=Oryza sativa subsp. japonica OX=39947 GN=HSFA2D PE=2 SV=2;	PF00447.19	HSF_DNA-bind	HSF-type DNA-binding
TraesCS4B02G278100	HSF	10.9533	3.17	-1.78882	down	-	GO:0006355;GO:0006357;GO:0009086;GO:0034605;GO:0005634;GO:0043565;GO:0010309;GO:0003700;GO:000097	BP:regulation of transcription, DNA-templated;BP:regulation of transcription from RNA polymerase II promoter;BP:methionine biosynthetic process;BP:cellular response to heat;CC:nucleus;MF:sequence-specific DNA binding;MF:acireductone dioxygenase [iro;MF:transcription factor activity, sequence-specific DNA binding;MF:RNA polymerase II core promoter proximal region sequence-specific DNA binding;	K09419;K08967	HSFF;mtnD, mtnZ, ADI1	map00270	Cysteine and methionine metabolism	COG5169;COG1791	K:Transcription;S:Function unknown	XP_037427414.1	uncharacterized protein LOC119292822 [Triticum dicoccoides]	sp|Q8H7Y6|HFA2D_ORYSJ;	Heat stress transcription factor A-2d OS=Oryza sativa subsp. japonica OX=39947 GN=HSFA2D PE=2 SV=2;	PF00447.19	HSF_DNA-bind	HSF-type DNA-binding
TraesCS7B02G168300	HSF	13.6167	1.88	-2.85657	down	-	GO:0006355;GO:0005634;GO:0003700;GO:004356	BP:regulation of transcription, DNA-templated;CC:nucleus;MF:transcription factor activity, sequence-specific DNA binding;MF:sequence-specific DNA binding;	K09419	HSFF	------	------	COG5169	K:Transcription	XP_040251789.1	heat stress transcription factor B-2b, partial [Aegilops tauschii subsp. strangulata]	sp|Q6Z9C8|HFB2B_ORYSJ;	Heat stress transcription factor B-2b OS=Oryza sativa subsp. japonica OX=39947 GN=HSFB2B PE=2 SV=1;	PF00447.19	HSF_DNA-bind	HSF-type DNA-binding
TraesCS7D02G270600	HSF	9.33667	1.20333	-2.95587	down	-	GO:0006355;GO:0005634;GO:0003700;GO:004356	BP:regulation of transcription, DNA-templated;CC:nucleus;MF:transcription factor activity, sequence-specific DNA binding;MF:sequence-specific DNA binding;	K09419	HSFF	------	------	COG5169	K:Transcription	XP_040251789.1	heat stress transcription factor B-2b, partial [Aegilops tauschii subsp. strangulata]	sp|Q6Z9C8|HFB2B_ORYSJ;	Heat stress transcription factor B-2b OS=Oryza sativa subsp. japonica OX=39947 GN=HSFB2B PE=2 SV=1;	PF00447.19	HSF_DNA-bind	HSF-type DNA-binding
TraesCS7A02G270100	HSF	9.44333	1.01667	-3.21545	down	Heat-responsive transcription factor [Source:UniProtKB/TrEMBL;Acc:A0A0D3QT57]	GO:0006355;GO:0006357;GO:0005634;GO:0043565;GO:0003700;GO:0003677;GO:000097	BP:regulation of transcription, DNA-templated;BP:regulation of transcription from RNA polymerase II promoter;CC:nucleus;MF:sequence-specific DNA binding;MF:transcription factor activity, sequence-specific DNA binding;MF:DNA binding;MF:RNA polymerase II core promoter proximal region sequence-specific DNA binding;	K09419	HSFF	------	------	COG5169	K:Transcription	XP_040251789.1	heat stress transcription factor B-2b, partial [Aegilops tauschii subsp. strangulata]	sp|Q6Z9C8|HFB2B_ORYSJ;	Heat stress transcription factor B-2b OS=Oryza sativa subsp. japonica OX=39947 GN=HSFB2B PE=2 SV=1;	PF00447.19	HSF_DNA-bind	HSF-type DNA-binding
TraesCS1A02G375600	HSF	62.4733	6.25333	-3.32054	down	Heat shock transcription factor A6e [Source:UniProtKB/TrEMBL;Acc:W4ZRM4]	GO:0006355;GO:0006357;GO:0034605;GO:0005634;GO:0043565;GO:0003700;GO:0003677;GO:0000978;GO:004280	BP:regulation of transcription, DNA-templated;BP:regulation of transcription from RNA polymerase II promoter;BP:cellular response to heat;CC:nucleus;MF:sequence-specific DNA binding;MF:transcription factor activity, sequence-specific DNA binding;MF:DNA binding;MF:RNA polymerase II core promoter proximal region sequence-specific DNA binding;MF:identical protein binding;	K09419;K08967	HSFF;mtnD, mtnZ, ADI1	map00270	Cysteine and methionine metabolism	COG5169	K:Transcription	XP_037425119.1	heat stress transcription factor A-2c-like [Triticum dicoccoides]	sp|Q338B0|HFA2C_ORYSJ;	Heat stress transcription factor A-2c OS=Oryza sativa subsp. japonica OX=39947 GN=HSFA2C PE=1 SV=2;	PF00447.19	HSF_DNA-bind	HSF-type DNA-binding
TraesCS1D02G382900	HSF	53.68	5.35333	-3.32588	down	-	GO:0006355;GO:0006357;GO:0034605;GO:0005634;GO:0043565;GO:0003700;GO:0000978;GO:004280	BP:regulation of transcription, DNA-templated;BP:regulation of transcription from RNA polymerase II promoter;BP:cellular response to heat;CC:nucleus;MF:sequence-specific DNA binding;MF:transcription factor activity, sequence-specific DNA binding;MF:RNA polymerase II core promoter proximal region sequence-specific DNA binding;MF:identical protein binding;	K09419;K08967	HSFF;mtnD, mtnZ, ADI1	map00270	Cysteine and methionine metabolism	COG5169	K:Transcription	KAF6997318.1	hypothetical protein CFC21_013553 [Triticum aestivum]	sp|Q338B0|HFA2C_ORYSJ;	Heat stress transcription factor A-2c OS=Oryza sativa subsp. japonica OX=39947 GN=HSFA2C PE=1 SV=2;	PF00447.19	HSF_DNA-bind	HSF-type DNA-binding
TraesCS2D02G399000	HSF	8.52333	0.686667	-3.63374	down	Similar to Heat stress transcription factor Spl7 (Heat shock transcription factor) (Heat shock factor RHSF10) [Source: Projected from Oryza sativa (Os04g0568700)]	GO:0006355;GO:0006357;GO:0005737;GO:0005634;GO:0043565;GO:0003700;GO:0003677;GO:000097	BP:regulation of transcription, DNA-templated;BP:regulation of transcription from RNA polymerase II promoter;CC:cytoplasm;CC:nucleus;MF:sequence-specific DNA binding;MF:transcription factor activity, sequence-specific DNA binding;MF:DNA binding;MF:RNA polymerase II core promoter proximal region sequence-specific DNA binding;	K09419	HSFF	------	------	COG5169	K:Transcription	XP_020152813.1	heat stress transcription factor B-2a [Aegilops tauschii subsp. strangulata]	sp|Q7XRX3|HFB2A_ORYSJ;	Heat stress transcription factor B-2a OS=Oryza sativa subsp. japonica OX=39947 GN=HSFB2A PE=2 SV=2;	PF00447.19	HSF_DNA-bind	HSF-type DNA-binding
TraesCS1B02G396000	HSF	62.0833	4.77667	-3.70013	down	-	GO:0006355;GO:0006357;GO:0034605;GO:0005634;GO:0043565;GO:0003700;GO:0000978;GO:004280	BP:regulation of transcription, DNA-templated;BP:regulation of transcription from RNA polymerase II promoter;BP:cellular response to heat;CC:nucleus;MF:sequence-specific DNA binding;MF:transcription factor activity, sequence-specific DNA binding;MF:RNA polymerase II core promoter proximal region sequence-specific DNA binding;MF:identical protein binding;	K09419;K08967	HSFF;mtnD, mtnZ, ADI1	map00270	Cysteine and methionine metabolism	COG5169	K:Transcription	KAF6991613.1	hypothetical protein CFC21_008682 [Triticum aestivum]	sp|Q338B0|HFA2C_ORYSJ;	Heat stress transcription factor A-2c OS=Oryza sativa subsp. japonica OX=39947 GN=HSFA2C PE=1 SV=2;	PF00447.19	HSF_DNA-bind	HSF-type DNA-binding
TraesCS2A02G401600	HSF	8.56333	0.596667	-3.84317	down	Similar to Heat stress transcription factor Spl7 (Heat shock transcription factor) (Heat shock factor RHSF10) [Source: Projected from Oryza sativa (Os04g0568700)]	GO:0006355;GO:0006357;GO:0005737;GO:0005634;GO:0043565;GO:0003700;GO:000097	BP:regulation of transcription, DNA-templated;BP:regulation of transcription from RNA polymerase II promoter;CC:cytoplasm;CC:nucleus;MF:sequence-specific DNA binding;MF:transcription factor activity, sequence-specific DNA binding;MF:RNA polymerase II core promoter proximal region sequence-specific DNA binding;	K09419	HSFF	------	------	COG5169	K:Transcription	KAF7002958.1	hypothetical protein CFC21_018357 [Triticum aestivum]	sp|Q7XRX3|HFB2A_ORYSJ;	Heat stress transcription factor B-2a OS=Oryza sativa subsp. japonica OX=39947 GN=HSFB2A PE=2 SV=2;	PF00447.19	HSF_DNA-bind	HSF-type DNA-binding
TraesCS2B02G419600	HSF	12.29	0.7	-4.13399	down	Similar to Heat stress transcription factor Spl7 (Heat shock transcription factor) (Heat shock factor RHSF10) [Source: Projected from Oryza sativa (Os04g0568700)]	GO:0006355;GO:0006357;GO:0005737;GO:0005634;GO:0043565;GO:0003700;GO:000097	BP:regulation of transcription, DNA-templated;BP:regulation of transcription from RNA polymerase II promoter;CC:cytoplasm;CC:nucleus;MF:sequence-specific DNA binding;MF:transcription factor activity, sequence-specific DNA binding;MF:RNA polymerase II core promoter proximal region sequence-specific DNA binding;	K09419	HSFF	------	------	COG5169	K:Transcription	XP_037486682.1	heat stress transcription factor B-2a-like [Triticum dicoccoides]	sp|Q7XRX3|HFB2A_ORYSJ;	Heat stress transcription factor B-2a OS=Oryza sativa subsp. japonica OX=39947 GN=HSFB2A PE=2 SV=2;	PF00447.19	HSF_DNA-bind	HSF-type DNA-binding
TraesCS5A02G383800	HSF	69.3233	3.6	-4.26727	down	-	GO:0006355;GO:0006357;GO:0034605;GO:0005634;GO:0043565;GO:0003700;GO:000097	BP:regulation of transcription, DNA-templated;BP:regulation of transcription from RNA polymerase II promoter;BP:cellular response to heat;CC:nucleus;MF:sequence-specific DNA binding;MF:transcription factor activity, sequence-specific DNA binding;MF:RNA polymerase II core promoter proximal region sequence-specific DNA binding;	K09419	HSFF	------	------	COG5169	K:Transcription	VAI21795.1	unnamed protein product [Triticum turgidum subsp. durum]	sp|Q84MN7|HFA2A_ORYSJ;	Heat stress transcription factor A-2a OS=Oryza sativa subsp. japonica OX=39947 GN=HSFA2A PE=2 SV=1;	PF00447.19	HSF_DNA-bind	HSF-type DNA-binding
TraesCS5D02G393200	HSF	93.1667	4.31667	-4.43182	down	-	GO:0006355;GO:0006357;GO:0034605;GO:0005634;GO:0043565;GO:0003700;GO:000097	BP:regulation of transcription, DNA-templated;BP:regulation of transcription from RNA polymerase II promoter;BP:cellular response to heat;CC:nucleus;MF:sequence-specific DNA binding;MF:transcription factor activity, sequence-specific DNA binding;MF:RNA polymerase II core promoter proximal region sequence-specific DNA binding;	K09419	HSFF	------	------	COG5169	K:Transcription	KAF7074617.1	hypothetical protein CFC21_079462 [Triticum aestivum]	sp|Q84MN7|HFA2A_ORYSJ;	Heat stress transcription factor A-2a OS=Oryza sativa subsp. japonica OX=39947 GN=HSFA2A PE=2 SV=1;	PF00447.19	HSF_DNA-bind	HSF-type DNA-binding
TraesCS4D02G276500	HSF	7.96667	2.08	-1.93739	down	-	GO:0006355;GO:0006357;GO:0009086;GO:0034605;GO:0005634;GO:0043565;GO:0010309;GO:0003700;GO:000097	BP:regulation of transcription, DNA-templated;BP:regulation of transcription from RNA polymerase II promoter;BP:methionine biosynthetic process;BP:cellular response to heat;CC:nucleus;MF:sequence-specific DNA binding;MF:acireductone dioxygenase [iro;MF:transcription factor activity, sequence-specific DNA binding;MF:RNA polymerase II core promoter proximal region sequence-specific DNA binding;	K09419;K08967	HSFF;mtnD, mtnZ, ADI1	map00270	Cysteine and methionine metabolism	COG5169;COG1791	K:Transcription;S:Function unknown	XP_037427414.1	uncharacterized protein LOC119292822 [Triticum dicoccoides]	sp|Q8H7Y6|HFA2D_ORYSJ;	Heat stress transcription factor A-2d OS=Oryza sativa subsp. japonica OX=39947 GN=HSFA2D PE=2 SV=2;	PF00447.19;PF17675.3	HSF_DNA-bind;APG6_N	HSF-type DNA-binding;Apg6 coiled-coil region
TraesCS4D02G001700	LBD	0.533333	1.59	1.57592	up	-	GO:000727	BP:multicellular organism development;	K13945	LBD29	------	------	ENOG410YGW0	S:Function unknown	KAF7051790.1	hypothetical protein CFC21_059990 [Triticum aestivum]	sp|Q5UG13|LBD_ORYSJ;	LOB domain-containing protein CRL1 OS=Oryza sativa subsp. japonica OX=39947 GN=CRL1 PE=1 SV=1;	PF03195.16	LOB	Lateral organ boundaries
TraesCS2A02G271300	LBD	13.76	6.36667	-1.11187	down	LOB domain-containing protein 41 [Source:Projected from Arabidopsis thaliana (AT3G02550) UniProtKB/Swiss-Prot;Acc:Q9M886]	GO:0006355;GO:0007275;GO:001046	BP:regulation of transcription, DNA-templated;BP:multicellular organism development;BP:regulation of gene expression;	------	------	------	------	ENOG410YBK4	S:Function unknown	XP_037477493.1	LOB domain-containing protein 40-like [Triticum dicoccoides]	sp|Q9M886|LBD41_ARATH;	LOB domain-containing protein 41 OS=Arabidopsis thaliana OX=3702 GN=LBD41 PE=2 SV=1;	PF03195.16	LOB	Lateral organ boundaries
TraesCS2D02G270100	LBD	8.75	3.65667	-1.25875	down	LOB domain-containing protein 41 [Source:Projected from Arabidopsis thaliana (AT3G02550) UniProtKB/Swiss-Prot;Acc:Q9M886]	GO:0006355;GO:0010468;GO:000727	BP:regulation of transcription, DNA-templated;BP:regulation of gene expression;BP:multicellular organism development;	------	------	------	------	ENOG410YBK4	S:Function unknown	XP_020176408.1	LOB domain-containing protein 40 [Aegilops tauschii subsp. strangulata]	sp|Q9M886|LBD41_ARATH;	LOB domain-containing protein 41 OS=Arabidopsis thaliana OX=3702 GN=LBD41 PE=2 SV=1;	PF03195.16	LOB	Lateral organ boundaries
TraesCS2B02G289800	LBD	16.72	6.32	-1.40358	down	LOB domain-containing protein 41 [Source:Projected from Arabidopsis thaliana (AT3G02550) UniProtKB/Swiss-Prot;Acc:Q9M886]	GO:000727	BP:multicellular organism development;	------	------	------	------	ENOG410YBK4	S:Function unknown	KAE8805633.1	LOB domain-containing protein 40 [Hordeum vulgare]	sp|Q9M886|LBD41_ARATH;	LOB domain-containing protein 41 OS=Arabidopsis thaliana OX=3702 GN=LBD41 PE=2 SV=1;	PF03195.16	LOB	Lateral organ boundaries
TraesCS3B02G106900	LBD	0.95	0.313333	-1.60023	down	-	GO:0010468;GO:000727	BP:regulation of gene expression;BP:multicellular organism development;	------	------	------	------	ENOG410YBK4	S:Function unknown	KAF7028006.1	hypothetical protein CFC21_039985 [Triticum aestivum]	sp|Q9ZW96|LBD40_ARATH;	LOB domain-containing protein 40 OS=Arabidopsis thaliana OX=3702 GN=LBD40 PE=2 SV=1;	PF03195.16	LOB	Lateral organ boundaries
TraesCS4B02G302600	MIKC	3.32333	1.42667	-1.21998	down	-	GO:0006355;GO:0045944;GO:0006351;GO:0005634;GO:0003700;GO:0003677;GO:0046983;GO:000097	BP:regulation of transcription, DNA-templated;BP:positive regulation of transcription from RNA polymerase II promoter;BP:transcription, DNA-templated;CC:nucleus;MF:transcription factor activity, sequence-specific DNA binding;MF:DNA binding;MF:protein dimerization activity;MF:RNA polymerase II regulatory region sequence-specific DNA binding;	------	------	------	------	COG5068	K:Transcription	KAF7050644.1	hypothetical protein CFC21_058978 [Triticum aestivum]	sp|Q5K4R0|MAD47_ORYSJ;	MADS-box transcription factor 47 OS=Oryza sativa subsp. japonica OX=39947 GN=MADS47 PE=1 SV=3;	PF00319.20;PF01486.19	SRF-TF;K-box	SRF-type transcription factor;K-box region
TraesCS6B02G322700	MIKC	87.85	15.4067	-2.51149	down	-	GO:0006355;GO:0006357;GO:0045944;GO:0006351;GO:0005634;GO:0003700;GO:0003677;GO:0046983;GO:0000978;GO:0000981;GO:000097	BP:regulation of transcription, DNA-templated;BP:regulation of transcription from RNA polymerase II promoter;BP:positive regulation of transcription from RNA polymerase II promoter;BP:transcription, DNA-templated;CC:nucleus;MF:transcription factor activity, sequence-specific DNA binding;MF:DNA binding;MF:protein dimerization activity;MF:RNA polymerase II core promoter proximal region sequence-spe…	K09264	K09264	------	------	COG5068	K:Transcription	KAF7085706.1	hypothetical protein CFC21_089104 [Triticum aestivum]	sp|Q6Z6W2|MAD57_ORYSJ;	MADS-box transcription factor 57 OS=Oryza sativa subsp. japonica OX=39947 GN=MADS57 PE=1 SV=2;	PF00319.20;PF01486.19	SRF-TF;K-box	SRF-type transcription factor;K-box region
TraesCS6D02G273500	MIKC	115.017	18.57	-2.6308	down	-	GO:0006355;GO:0006357;GO:0045944;GO:0006351;GO:0005634;GO:0003700;GO:0003677;GO:0046983;GO:0000978;GO:0000981;GO:000097	BP:regulation of transcription, DNA-templated;BP:regulation of transcription from RNA polymerase II promoter;BP:positive regulation of transcription from RNA polymerase II promoter;BP:transcription, DNA-templated;CC:nucleus;MF:transcription factor activity, sequence-specific DNA binding;MF:DNA binding;MF:protein dimerization activity;MF:RNA polymerase II core promoter proximal region sequence-spe…	K09264	K09264	------	------	COG5068	K:Transcription	KAF7090844.1	hypothetical protein CFC21_093533 [Triticum aestivum]	sp|Q6Z6W2|MAD57_ORYSJ;	MADS-box transcription factor 57 OS=Oryza sativa subsp. japonica OX=39947 GN=MADS57 PE=1 SV=2;	PF00319.20;PF01486.19	SRF-TF;K-box	SRF-type transcription factor;K-box region
TraesCS6A02G292300	MIKC	43.8367	6.99333	-2.64809	down	-	GO:0040008;GO:0006355;GO:0006357;GO:0045944;GO:0006351;GO:0005634;GO:0003700;GO:0003677;GO:0046983;GO:0000978;GO:0000981;GO:000097	BP:regulation of growth;BP:regulation of transcription, DNA-templated;BP:regulation of transcription from RNA polymerase II promoter;BP:positive regulation of transcription from RNA polymerase II promoter;BP:transcription, DNA-templated;CC:nucleus;MF:transcription factor activity, sequence-specific DNA binding;MF:DNA binding;MF:protein dimerization activity;MF:RNA polymerase II core promoter prox…	K09264	K09264	------	------	COG5068	K:Transcription	XP_037448149.1	MADS-box transcription factor 57-like isoform X2 [Triticum dicoccoides]	sp|Q6Z6W2|MAD57_ORYSJ;	MADS-box transcription factor 57 OS=Oryza sativa subsp. japonica OX=39947 GN=MADS57 PE=1 SV=2;	PF00319.20;PF01486.19	SRF-TF;K-box	SRF-type transcription factor;K-box region
TraesCS3D02G531900	MYB	0.08	0.76	3.24793	up	PHYTOCLOCK 1 [Source:UniProtKB/TrEMBL;Acc:A0A1D5WHP5]	GO:0006355;GO:0005634;GO:0003700;GO:000367	BP:regulation of transcription, DNA-templated;CC:nucleus;MF:transcription factor activity, sequence-specific DNA binding;MF:DNA binding;	------	------	------	------	ENOG410XXJ3	K:Transcription	XP_020165352.1	transcription factor PCL1 [Aegilops tauschii subsp. strangulata]	sp|Q94DH3|PCL1_ORYSJ;	Transcription factor PCL1 OS=Oryza sativa subsp. japonica OX=39947 GN=PCL1 PE=2 SV=1;	PF00249.33	Myb_DNA-binding	Myb-like DNA-binding domain
TraesCS2D02G488500	MYB	6.15333	13.3667	1.1192	up	-	GO:0005634;GO:000367	CC:nucleus;MF:DNA binding;	------	------	------	------	ENOG410YGDG	S:Function unknown	KAF7018734.1	hypothetical protein CFC21_031990 [Triticum aestivum]	sp|Q9SJW0|PHL7_ARATH;	Myb family transcription factor PHL7 OS=Arabidopsis thaliana OX=3702 GN=PHL7 PE=2 SV=1;	PF14379.8;PF00249.33	Myb_CC_LHEQLE;Myb_DNA-binding	MYB-CC type transfactor, LHEQLE motif;Myb-like DNA-binding domain
TraesCS3A02G526600	MYB	0.223333	1.10333	2.3046	up	LUX-A [Source:UniProtKB/TrEMBL;Acc:W0M071]	GO:0006355;GO:0005634;GO:0003700;GO:000367	BP:regulation of transcription, DNA-templated;CC:nucleus;MF:transcription factor activity, sequence-specific DNA binding;MF:DNA binding;	------	------	------	------	ENOG410XXJ3	K:Transcription	AHG29010.1	LUX-A [Triticum aestivum]	sp|Q94DH3|PCL1_ORYSJ;	Transcription factor PCL1 OS=Oryza sativa subsp. japonica OX=39947 GN=PCL1 PE=2 SV=1;	PF00249.33	Myb_DNA-binding	Myb-like DNA-binding domain
TraesCS3B02G394200	MYB	0.606667	1.76333	1.53933	up	-	GO:0005634;GO:0003700;GO:000367	CC:nucleus;MF:transcription factor activity, sequence-specific DNA binding;MF:DNA binding;	------	------	------	------	ENOG41105NS	S:Function unknown	KAF7031576.1	hypothetical protein CFC21_042890 [Triticum aestivum]	sp|Q94DH3|PCL1_ORYSJ;	Transcription factor PCL1 OS=Oryza sativa subsp. japonica OX=39947 GN=PCL1 PE=2 SV=1;	PF00249.33	Myb_DNA-binding	Myb-like DNA-binding domain
TraesCS3D02G355500	MYB	0.62	1.39333	1.1682	up	-	GO:0005634;GO:0003700;GO:000367	CC:nucleus;MF:transcription factor activity, sequence-specific DNA binding;MF:DNA binding;	------	------	------	------	ENOG41105NS	S:Function unknown	KAF7038576.1	hypothetical protein CFC21_048747 [Triticum aestivum]	sp|Q94DH3|PCL1_ORYSJ;	Transcription factor PCL1 OS=Oryza sativa subsp. japonica OX=39947 GN=PCL1 PE=2 SV=1;	PF00249.33	Myb_DNA-binding	Myb-like DNA-binding domain
TraesCS7D02G014900	MYB	11.1367	5.13	-1.11829	down	-	GO:0005634;GO:000367	CC:nucleus;MF:DNA binding;	------	------	------	------	COG5269;ENOG4111HV1	K:Transcription;	XP_037458678.1	protein REVEILLE 8-like isoform X1 [Triticum dicoccoides]	sp|Q8RWU3|RVE8_ARATH;	Protein REVEILLE 8 OS=Arabidopsis thaliana OX=3702 GN=RVE8 PE=2 SV=1;	PF00249.33	Myb_DNA-binding	Myb-like DNA-binding domain
TraesCS7A02G017600	MYB	2.87	1.23333	-1.21849	down	-	GO:0005634;GO:000367	CC:nucleus;MF:DNA binding;	------	------	------	------	COG5269;ENOG4111HV1	K:Transcription;	XP_037458678.1	protein REVEILLE 8-like isoform X1 [Triticum dicoccoides]	sp|Q8RWU3|RVE8_ARATH;	Protein REVEILLE 8 OS=Arabidopsis thaliana OX=3702 GN=RVE8 PE=2 SV=1;	PF00249.33	Myb_DNA-binding	Myb-like DNA-binding domain
TraesCS6A02G258600	MYB	7.89	3.11667	-1.34002	down	-	GO:0005634;GO:000367	CC:nucleus;MF:DNA binding;	------	------	------	------	ENOG4111HV1	K:Transcription	KAF7079820.1	hypothetical protein CFC21_083999 [Triticum aestivum]	sp|Q8H0W3|RVE6_ARATH;	Protein REVEILLE 6 OS=Arabidopsis thaliana OX=3702 GN=RVE6 PE=2 SV=1;	PF00249.33	Myb_DNA-binding	Myb-like DNA-binding domain
TraesCS7A02G299400	MYB	48.9767	13.2233	-1.88901	down	-	GO:0005634;GO:000367	CC:nucleus;MF:DNA binding;	K12133	LHY	map04712	Circadian rhythm - plant	ENOG4111X77	K:Transcription	KAF7096025.1	hypothetical protein CFC21_098040 [Triticum aestivum]	sp|A0A0G3VTN5|LHY_PETHY;	Protein LATE ELONGATED HYPOCOTYL OS=Petunia hybrida OX=4102 GN=LHY PE=2 SV=1;	PF00249.33	Myb_DNA-binding	Myb-like DNA-binding domain
TraesCS7B02G188000	MYB	61.1133	15.41	-1.98762	down	-	GO:0005634;GO:000367	CC:nucleus;MF:DNA binding;	K12133	LHY	map04712	Circadian rhythm - plant	ENOG4111X77	K:Transcription	KAF7101644.1	hypothetical protein CFC21_102912 [Triticum aestivum]	sp|A0A0G3VTN5|LHY_PETHY;	Protein LATE ELONGATED HYPOCOTYL OS=Petunia hybrida OX=4102 GN=LHY PE=2 SV=1;	PF00249.33	Myb_DNA-binding	Myb-like DNA-binding domain
TraesCS4A02G474100	MYB	6.44333	1.51	-2.09326	down	-	GO:0005634;GO:000367	CC:nucleus;MF:DNA binding;	------	------	------	------	COG5269;ENOG4111HV1	K:Transcription;	KAF7046592.1	hypothetical protein CFC21_055614 [Triticum aestivum]	sp|Q8RWU3|RVE8_ARATH;	Protein REVEILLE 8 OS=Arabidopsis thaliana OX=3702 GN=RVE8 PE=2 SV=1;	PF00249.33	Myb_DNA-binding	Myb-like DNA-binding domain
TraesCS7D02G295400	MYB	50.7133	7.78	-2.70452	down	-	GO:0005634;GO:000367	CC:nucleus;MF:DNA binding;	K12133	LHY	map04712	Circadian rhythm - plant	ENOG4111X77	K:Transcription	KAF7109084.1	hypothetical protein CFC21_109398 [Triticum aestivum]	sp|A0A0G3VTN5|LHY_PETHY;	Protein LATE ELONGATED HYPOCOTYL OS=Petunia hybrida OX=4102 GN=LHY PE=2 SV=1;	PF00249.33	Myb_DNA-binding	Myb-like DNA-binding domain
TraesCS3A02G254500	MYB	0.82	2.02667	1.30541	up	-	------	------	K09422	MYBP	------	------	COG5147	K:Transcription	KAF7023276.1	hypothetical protein CFC21_035832 [Triticum aestivum]	sp|P20027|MYB3_HORVU;	Myb-related protein Hv33 OS=Hordeum vulgare OX=4513 GN=MYB2 PE=2 SV=3;	PF00249.33;PF13921.8	Myb_DNA-binding;Myb_DNA-bind_6	Myb-like DNA-binding domain;Myb-like DNA-binding domain
TraesCS3D02G255400	MYB	0.733333	1.79667	1.29278	up	-	GO:0010119;GO:000367	BP:regulation of stomatal movement;MF:DNA binding;	K09422	MYBP	------	------	COG5147	K:Transcription	XP_020199496.1	myb-related protein Hv33 [Aegilops tauschii subsp. strangulata]	sp|P20027|MYB3_HORVU;	Myb-related protein Hv33 OS=Hordeum vulgare OX=4513 GN=MYB2 PE=2 SV=3;	PF00249.33;PF13921.8	Myb_DNA-binding;Myb_DNA-bind_6	Myb-like DNA-binding domain;Myb-like DNA-binding domain
TraesCS3B02G286500	MYB	0.736667	1.55667	1.07938	up	-	GO:0010119;GO:000367	BP:regulation of stomatal movement;MF:DNA binding;	K09422	MYBP	------	------	COG5147	K:Transcription	XP_037413648.1	myb-related protein Hv33-like [Triticum dicoccoides]	sp|P20027|MYB3_HORVU;	Myb-related protein Hv33 OS=Hordeum vulgare OX=4513 GN=MYB2 PE=2 SV=3;	PF00249.33;PF13921.8	Myb_DNA-binding;Myb_DNA-bind_6	Myb-like DNA-binding domain;Myb-like DNA-binding domain
TraesCS5B02G203100	MYB	1.1	2.21667	1.01089	up	-	GO:000367	MF:DNA binding;	K09422	MYBP	------	------	COG5147	K:Transcription	KAF7065464.1	hypothetical protein CFC21_071563 [Triticum aestivum]	sp|Q9C7U7|MYB20_ARATH;	Transcription factor MYB20 OS=Arabidopsis thaliana OX=3702 GN=MYB20 PE=2 SV=1;	PF00249.33;PF13921.8	Myb_DNA-binding;Myb_DNA-bind_6	Myb-like DNA-binding domain;Myb-like DNA-binding domain
TraesCS2D02G158200	MYB	2.77	5.56667	1.00693	up	-	GO:000367	MF:DNA binding;	K09422	MYBP	------	------	COG5147	K:Transcription	KAF7014600.1	hypothetical protein CFC21_028581 [Triticum aestivum]	sp|Q8LPH6|MYB86_ARATH;	Transcription factor MYB86 OS=Arabidopsis thaliana OX=3702 GN=MYB86 PE=2 SV=1;	PF00249.33;PF13921.8	Myb_DNA-binding;Myb_DNA-bind_6	Myb-like DNA-binding domain;Myb-like DNA-binding domain
TraesCS3A02G044700	MYB	1.93	0.953333	-1.01755	down	-	GO:0006355;GO:0005634;GO:0003700;GO:004356	BP:regulation of transcription, DNA-templated;CC:nucleus;MF:transcription factor activity, sequence-specific DNA binding;MF:sequence-specific DNA binding;	K09422	MYBP	------	------	COG5147	K:Transcription	XP_037408911.1	transcription factor MYB62-like [Triticum dicoccoides]	sp|Q9C9G7|MYB62_ARATH;	Transcription factor MYB62 OS=Arabidopsis thaliana OX=3702 GN=MYB62 PE=2 SV=1;	PF00249.33;PF13921.8	Myb_DNA-binding;Myb_DNA-bind_6	Myb-like DNA-binding domain;Myb-like DNA-binding domain
TraesCS1D02G078600	MYB	2.29667	1.07	-1.10193	down	-	GO:0006355;GO:0005634;GO:0003700;GO:0043565;GO:000367	BP:regulation of transcription, DNA-templated;CC:nucleus;MF:transcription factor activity, sequence-specific DNA binding;MF:sequence-specific DNA binding;MF:DNA binding;	K09422	MYBP	------	------	COG5147	K:Transcription	XP_020164818.1	transcription factor JAMYB [Aegilops tauschii subsp. strangulata]	sp|Q10MB4|MYB2_ORYSJ;	Transcription factor MYB2 OS=Oryza sativa subsp. japonica OX=39947 GN=MYB2 PE=2 SV=1;	PF00249.33;PF13921.8	Myb_DNA-binding;Myb_DNA-bind_6	Myb-like DNA-binding domain;Myb-like DNA-binding domain
TraesCS6D02G211100	MYB	3.39667	1.54667	-1.13496	down	-	GO:000367	MF:DNA binding;	K09422	MYBP	------	------	COG5147	K:Transcription	KAF7090073.1	hypothetical protein CFC21_092891 [Triticum aestivum]	sp|Q6K1S6|MYB30_ORYSJ;	Transcription factor MYB30 OS=Oryza sativa subsp. japonica OX=39947 GN=MYB30 PE=1 SV=1;	PF00249.33;PF13921.8	Myb_DNA-binding;Myb_DNA-bind_6	Myb-like DNA-binding domain;Myb-like DNA-binding domain
TraesCS6A02G224400	MYB	4.59667	1.96333	-1.22728	down	MYB33 [Source:UniProtKB/TrEMBL;Acc:G3LZX9]	GO:000367	MF:DNA binding;	K09422	MYBP	------	------	COG5147	K:Transcription	XP_037447472.1	transcription factor MYB30-like [Triticum dicoccoides]	sp|Q6K1S6|MYB30_ORYSJ;	Transcription factor MYB30 OS=Oryza sativa subsp. japonica OX=39947 GN=MYB30 PE=1 SV=1;	PF00249.33;PF13921.8	Myb_DNA-binding;Myb_DNA-bind_6	Myb-like DNA-binding domain;Myb-like DNA-binding domain
TraesCS6A02G261100	MYB	1.17333	0.47	-1.31988	down	-	GO:0005634;GO:000367	CC:nucleus;MF:DNA binding;	------	------	------	------	ENOG4111X77	K:Transcription	XP_037447811.1	protein REVEILLE 1-like isoform X2 [Triticum dicoccoides]	sp|F4KGY6|RVE1_ARATH;	Protein REVEILLE 1 OS=Arabidopsis thaliana OX=3702 GN=RVE1 PE=1 SV=1;	PF00249.33;PF13921.8	Myb_DNA-binding;Myb_DNA-bind_6	Myb-like DNA-binding domain;Myb-like DNA-binding domain
TraesCS2D02G445900	MYB	1.45	0.566667	-1.35548	down	-	GO:000367	MF:DNA binding;	K09422	MYBP	------	------	------	------	XP_020169252.1	transcription factor MYB41-like [Aegilops tauschii subsp. strangulata]	sp|Q8GWP0|MYB39_ARATH;	Transcription factor MYB39 OS=Arabidopsis thaliana OX=3702 GN=MYB39 PE=1 SV=1;	PF00249.33;PF13921.8	Myb_DNA-binding;Myb_DNA-bind_6	Myb-like DNA-binding domain;Myb-like DNA-binding domain
TraesCS6A02G224100	MYB	1.87667	0.73	-1.3622	down	-	GO:000367	MF:DNA binding;	K09422	MYBP	------	------	COG5147	K:Transcription	KAF7079431.1	hypothetical protein CFC21_083662 [Triticum aestivum]	sp|Q6K1S6|MYB30_ORYSJ;	Transcription factor MYB30 OS=Oryza sativa subsp. japonica OX=39947 GN=MYB30 PE=1 SV=1;	PF00249.33;PF13921.8	Myb_DNA-binding;Myb_DNA-bind_6	Myb-like DNA-binding domain;Myb-like DNA-binding domain
TraesCS6D02G241900	MYB	0.913333	0.343333	-1.41153	down	-	GO:0005634;GO:000367	CC:nucleus;MF:DNA binding;	------	------	------	------	ENOG4111X77	K:Transcription	XP_020193937.1	protein REVEILLE 1 [Aegilops tauschii subsp. strangulata]	sp|F4KGY6|RVE1_ARATH;	Protein REVEILLE 1 OS=Arabidopsis thaliana OX=3702 GN=RVE1 PE=1 SV=1;	PF00249.33;PF13921.8	Myb_DNA-binding;Myb_DNA-bind_6	Myb-like DNA-binding domain;Myb-like DNA-binding domain
TraesCS6B02G257000	MYB	4.88333	1.73667	-1.49155	down	Myb33 [Source:UniProtKB/TrEMBL;Acc:A0A182BBB2]	GO:000367	MF:DNA binding;	K09422	MYBP	------	------	COG5147	K:Transcription	XP_037450124.1	transcription factor MYB30-like [Triticum dicoccoides]	sp|Q6K1S6|MYB30_ORYSJ;	Transcription factor MYB30 OS=Oryza sativa subsp. japonica OX=39947 GN=MYB30 PE=1 SV=1;	PF00249.33;PF13921.8	Myb_DNA-binding;Myb_DNA-bind_6	Myb-like DNA-binding domain;Myb-like DNA-binding domain
TraesCS6B02G288500	MYB	1.17	0.32	-1.87036	down	MYB-related protein [Source:UniProtKB/TrEMBL;Acc:G9DRA4]	GO:0005634;GO:000367	CC:nucleus;MF:DNA binding;	------	------	------	------	ENOG4111X77	K:Transcription	XP_037452656.1	protein REVEILLE 1-like [Triticum dicoccoides]	sp|F4KGY6|RVE1_ARATH;	Protein REVEILLE 1 OS=Arabidopsis thaliana OX=3702 GN=RVE1 PE=1 SV=1;	PF00249.33;PF13921.8	Myb_DNA-binding;Myb_DNA-bind_6	Myb-like DNA-binding domain;Myb-like DNA-binding domain
TraesCS1B02G094500	MYB	1.61333	0.37	-2.12445	down	-	GO:0006355;GO:0005634;GO:0003700;GO:0043565;GO:000367	BP:regulation of transcription, DNA-templated;CC:nucleus;MF:transcription factor activity, sequence-specific DNA binding;MF:sequence-specific DNA binding;MF:DNA binding;	K09422	MYBP	------	------	COG5147	K:Transcription	VAH13876.1	unnamed protein product [Triticum turgidum subsp. durum]	sp|Q10MB4|MYB2_ORYSJ;	Transcription factor MYB2 OS=Oryza sativa subsp. japonica OX=39947 GN=MYB2 PE=2 SV=1;	PF00249.33;PF13921.8	Myb_DNA-binding;Myb_DNA-bind_6	Myb-like DNA-binding domain;Myb-like DNA-binding domain
TraesCS2A02G447400	MYB	0.873333	0.166667	-2.38956	down	-	GO:000367	MF:DNA binding;	K09422	MYBP	------	------	------	------	KAF7003536.1	hypothetical protein CFC21_018834 [Triticum aestivum]	sp|Q8GWP0|MYB39_ARATH;	Transcription factor MYB39 OS=Arabidopsis thaliana OX=3702 GN=MYB39 PE=1 SV=1;	PF00249.33;PF13921.8	Myb_DNA-binding;Myb_DNA-bind_6	Myb-like DNA-binding domain;Myb-like DNA-binding domain
TraesCS7A02G553800	MYB	36.6933	6.58333	-2.47863	down	-	GO:0005634;GO:000367	CC:nucleus;MF:DNA binding;	------	------	------	------	ENOG4111HV1	K:Transcription	XP_037460342.1	protein LHY-like isoform X1 [Triticum dicoccoides]	sp|F4K5X6|RVE2_ARATH;	Protein REVEILLE 2 OS=Arabidopsis thaliana OX=3702 GN=RVE2 PE=1 SV=1;	PF00249.33;PF13921.8	Myb_DNA-binding;Myb_DNA-bind_6	Myb-like DNA-binding domain;Myb-like DNA-binding domain
TraesCS7B02G478200	MYB	32.76	7.21667	-2.18253	down	-	GO:0005634;GO:000367	CC:nucleus;MF:DNA binding;	------	------	------	------	ENOG4111HV1	K:Transcription	KAF7105202.1	hypothetical protein CFC21_106034 [Triticum aestivum]	sp|F4K5X6|RVE2_ARATH;	Protein REVEILLE 2 OS=Arabidopsis thaliana OX=3702 GN=RVE2 PE=1 SV=1;	PF00249.33;PF13921.8;PF15963.7	Myb_DNA-binding;Myb_DNA-bind_6;Myb_DNA-bind_7	Myb-like DNA-binding domain;Myb-like DNA-binding domain;Myb DNA-binding like
TraesCS7D02G540700	MYB	36.11	6.62	-2.4475	down	-	GO:0005634;GO:000367	CC:nucleus;MF:DNA binding;	------	------	------	------	ENOG4111HV1	K:Transcription	XP_020180978.1	protein LHY isoform X1 [Aegilops tauschii subsp. strangulata]	sp|F4K5X6|RVE2_ARATH;	Protein REVEILLE 2 OS=Arabidopsis thaliana OX=3702 GN=RVE2 PE=1 SV=1;	PF00249.33;PF13921.8;PF15963.7	Myb_DNA-binding;Myb_DNA-bind_6;Myb_DNA-bind_7	Myb-like DNA-binding domain;Myb-like DNA-binding domain;Myb DNA-binding like
TraesCS6B02G266800	MYB	6.74	2.94667	-1.19366	down	-	GO:0005634;GO:000367	CC:nucleus;MF:DNA binding;	------	------	------	------	ENOG4111HV1	K:Transcription	VAI59495.1	unnamed protein product [Triticum turgidum subsp. durum]	sp|Q8H0W3|RVE6_ARATH;	Protein REVEILLE 6 OS=Arabidopsis thaliana OX=3702 GN=RVE6 PE=2 SV=1;	PF00249.33;PF15963.7	Myb_DNA-binding;Myb_DNA-bind_7	Myb-like DNA-binding domain;Myb DNA-binding like
TraesCS6D02G239800	MYB	11.4267	4.24333	-1.42913	down	-	GO:0005634;GO:000367	CC:nucleus;MF:DNA binding;	------	------	------	------	ENOG4111HV1	K:Transcription	XP_020182046.1	protein REVEILLE 6 isoform X1 [Aegilops tauschii subsp. strangulata]	sp|Q8H0W3|RVE6_ARATH;	Protein REVEILLE 6 OS=Arabidopsis thaliana OX=3702 GN=RVE6 PE=2 SV=1;	PF00249.33;PF15963.7	Myb_DNA-binding;Myb_DNA-bind_7	Myb-like DNA-binding domain;Myb DNA-binding like
TraesCS7A02G021800	MYB	0.596667	0.26	-1.19841	down	-	GO:0006952;GO:0005634;GO:0005524;GO:0043531;GO:000367	BP:defense response;CC:nucleus;MF:ATP binding;MF:ADP binding;MF:DNA binding;	------	------	------	------	------	------	XP_040251369.1	disease resistance protein RGA5 [Aegilops tauschii subsp. strangulata]	sp|F7J0N2|RGA5R_ORYSJ;	Disease resistance protein RGA5 OS=Oryza sativa subsp. japonica OX=39947 GN=RGA5 PE=1 SV=1;	PF00931.24;PF00249.33;PF13921.8;PF18052.3	NB-ARC;Myb_DNA-binding;Myb_DNA-bind_6;Rx_N	NB-ARC domain;Myb-like DNA-binding domain;Myb-like DNA-binding domain;Rx N-terminal domain
TraesCS1D02G082400	MYB	5.59333	2.49333	-1.16563	down	-	GO:0006511;GO:0000209;GO:0005634;GO:0061631;GO:0016740;GO:0003677;GO:000552	BP:ubiquitin-dependent protein catabolic process;BP:protein polyubiquitination;CC:nucleus;MF:ubiquitin conjugating enzyme activity;MF:transferase activity;MF:DNA binding;MF:ATP binding;	K06689	UBE2D, UBC4, UBC5	map04120;map04141	Ubiquitin mediated proteolysis;Protein processing in endoplasmic reticulum	COG5078	O:Posttranslational modification, protein turnover, chaperones	KAF6993635.1	hypothetical protein CFC21_010501 [Triticum aestivum]	sp|Q94F47|UBC28_ARATH;	Ubiquitin-conjugating enzyme E2 28 OS=Arabidopsis thaliana OX=3702 GN=UBC28 PE=1 SV=1;	PF00179.28	UQ_con	Ubiquitin-conjugating enzyme
TraesCS1D02G004800	NAC	0.856667	0.02	-5.42066	down	-	GO:0006355;GO:0005634;GO:0046872;GO:000367	BP:regulation of transcription, DNA-templated;CC:nucleus;MF:metal ion binding;MF:DNA binding;	------	------	------	------	COG2214	O:Posttranslational modification, protein turnover, chaperones	XP_020149352.1	uncharacterized protein LOC109734557 isoform X1 [Aegilops tauschii subsp. strangulata]	sp|Q8GYX8|DNJ10_ARATH;	Chaperone protein dnaJ 10 OS=Arabidopsis thaliana OX=3702 GN=ATJ10 PE=2 SV=2;	PF00226.33;PF02365.17;PF02892.17	DnaJ;NAM;zf-BED	DnaJ domain;No apical meristem;BED zinc finger
TraesCS7A02G305200	NAC	0.563333	1.6	1.50601	up	-	GO:0006355;GO:0005634;GO:000367	BP:regulation of transcription, DNA-templated;CC:nucleus;MF:DNA binding;	------	------	------	------	ENOG41106HE	S:Function unknown	QOI08285.1	NAC001_7A [Triticum aestivum]	sp|Q84TE6|NAC22_ARATH;	NAC domain-containing protein 21/22 OS=Arabidopsis thaliana OX=3702 GN=NAC021 PE=1 SV=2;	PF02365.17	NAM	No apical meristem
TraesCS4B02G098200	NAC	6.98	16.29	1.22269	up	-	GO:0006355;GO:0045893;GO:1901002;GO:0005634;GO:000367	BP:regulation of transcription, DNA-templated;BP:positive regulation of transcription, DNA-templated;BP:positive regulation of response to salt stress;CC:nucleus;MF:DNA binding;	------	------	------	------	ENOG4110887	K:Transcription	XP_037429578.1	NAC domain-containing protein 71-like [Triticum dicoccoides]	sp|Q53NF7|NAC71_ORYSJ;	NAC domain-containing protein 71 OS=Oryza sativa subsp. japonica OX=39947 GN=NAC071 PE=1 SV=1;	PF02365.17	NAM	No apical meristem
TraesCS4A02G219700	NAC	8.91	20.0467	1.16987	up	-	GO:0006355;GO:0045893;GO:1901002;GO:0005634;GO:000367	BP:regulation of transcription, DNA-templated;BP:positive regulation of transcription, DNA-templated;BP:positive regulation of response to salt stress;CC:nucleus;MF:DNA binding;	------	------	------	------	ENOG4110887	K:Transcription	KAF7042030.1	hypothetical protein CFC21_051733 [Triticum aestivum]	sp|Q53NF7|NAC71_ORYSJ;	NAC domain-containing protein 71 OS=Oryza sativa subsp. japonica OX=39947 GN=NAC071 PE=1 SV=1;	PF02365.17	NAM	No apical meristem
TraesCS4D02G094400	NAC	11.4767	25.64	1.15969	up	-	GO:0006355;GO:0045893;GO:1901002;GO:0005634;GO:000367	BP:regulation of transcription, DNA-templated;BP:positive regulation of transcription, DNA-templated;BP:positive regulation of response to salt stress;CC:nucleus;MF:DNA binding;	------	------	------	------	ENOG4110887	K:Transcription	XP_020163238.1	NAC domain-containing protein 71 [Aegilops tauschii subsp. strangulata]	sp|Q53NF7|NAC71_ORYSJ;	NAC domain-containing protein 71 OS=Oryza sativa subsp. japonica OX=39947 GN=NAC071 PE=1 SV=1;	PF02365.17	NAM	No apical meristem
TraesCS6D02G362900	NAC	6.78	3.34	-1.02144	down	-	GO:0006355;GO:0005634;GO:000367	BP:regulation of transcription, DNA-templated;CC:nucleus;MF:DNA binding;	------	------	------	------	ENOG410YD3I	S:Function unknown	KAF7091916.1	hypothetical protein CFC21_094457 [Triticum aestivum]	sp|Q9FLR3|NAC79_ARATH;	NAC domain-containing protein 79 OS=Arabidopsis thaliana OX=3702 GN=NAC079 PE=2 SV=1;	PF02365.17	NAM	No apical meristem
TraesCS2A02G101900	NAC	5.06667	2.09	-1.27753	down	-	GO:0006355;GO:0005634;GO:000367	BP:regulation of transcription, DNA-templated;CC:nucleus;MF:DNA binding;	------	------	------	------	ENOG4110680	S:Function unknown	XP_037475734.1	NAC domain-containing protein 2-like [Triticum dicoccoides]	sp|D2SMN4|NAMB1_HORVS;	NAC transcription factor NAM-B1 OS=Hordeum vulgare subsp. spontaneum OX=77009 GN=NAM-B1 PE=4 SV=1;	PF02365.17	NAM	No apical meristem
TraesCS2A02G459700	NAC	1.23667	0.403333	-1.61641	down	-	GO:0006355;GO:0005634;GO:000367	BP:regulation of transcription, DNA-templated;CC:nucleus;MF:DNA binding;	------	------	------	------	ENOG41108W6;ENOG410Y97V;ENOG4111BC1	S:Function unknown;K:Transcription;K:Transcription	KAF7003660.1	hypothetical protein CFC21_018953 [Triticum aestivum]	sp|Q75HE5|NAC2_ORYSJ;	NAC domain-containing protein 2 OS=Oryza sativa subsp. japonica OX=39947 GN=NAC002 PE=1 SV=1;	PF02365.17	NAM	No apical meristem
TraesCS3A02G375400	NAC	0.93	0.233333	-1.99484	down	-	GO:0006355;GO:0005634;GO:000367	BP:regulation of transcription, DNA-templated;CC:nucleus;MF:DNA binding;	------	------	------	------	ENOG410YGJ5	S:Function unknown	KAF7024745.1	hypothetical protein CFC21_037045 [Triticum aestivum]	sp|Q9FMR3|NAC90_ARATH;	NAC domain-containing protein 90 OS=Arabidopsis thaliana OX=3702 GN=NAC090 PE=1 SV=1;	PF02365.17	NAM	No apical meristem
TraesCS5A02G220900	NAC	0.346667	0.016667	-4.37848	down	-	GO:0006355;GO:0005634;GO:000367	BP:regulation of transcription, DNA-templated;CC:nucleus;MF:DNA binding;	------	------	------	------	ENOG410Y957	S:Function unknown	KAF7058998.1	hypothetical protein CFC21_065958 [Triticum aestivum]	sp|Q949N0|NAC53_ARATH;	NAC domain-containing protein 53 OS=Arabidopsis thaliana OX=3702 GN=NAC053 PE=2 SV=1;	PF02365.17	NAM	No apical meristem
TraesCS5A02G029900	NF-YA	0.876667	1.98	1.1754	up	-	GO:0006355;GO:0006357;GO:0016602;GO:0005634;GO:0003700;GO:0003677;GO:0000978;GO:000098	BP:regulation of transcription, DNA-templated;BP:regulation of transcription from RNA polymerase II promoter;CC:CCAAT-binding factor complex;CC:nucleus;MF:transcription factor activity, sequence-specific DNA binding;MF:DNA binding;MF:RNA polymerase II core promoter proximal region sequence-specific DNA binding;MF:RNA polymerase II transcription factor activity, sequence-specific DNA binding;	K08064	NFYA, HAP2	------	------	COG5224	K:Transcription	KAF7056657.1	hypothetical protein CFC21_064042 [Triticum aestivum]	sp|Q9M9X4|NFYA2_ARATH;	Nuclear transcription factor Y subunit A-2 OS=Arabidopsis thaliana OX=3702 GN=NFYA2 PE=2 SV=1;	PF02045.17	CBFB_NFYA	CCAAT-binding transcription factor
TraesCS7A02G406300	SRS	2.15667	1.03667	-1.05685	down	-	GO:0045893;GO:0005634;GO:000367	BP:positive regulation of transcription, DNA-templated;CC:nucleus;MF:DNA binding;	------	------	------	------	ENOG410YDRX	S:Function unknown	XP_037463020.1	protein SHI RELATED SEQUENCE 1-like [Triticum dicoccoides]	sp|Q9XGX0|SHI_ARATH;	Protein SHORT INTERNODES OS=Arabidopsis thaliana OX=3702 GN=SHI PE=1 SV=1;	PF05142.14	DUF702	Domain of unknown function
TraesCS2A02G104800	WRKY	0.606667	1.42667	1.23367	up	-	GO:0006355;GO:0005634;GO:0003700;GO:004356	BP:regulation of transcription, DNA-templated;CC:nucleus;MF:transcription factor activity, sequence-specific DNA binding;MF:sequence-specific DNA binding;	------	------	------	------	ENOG4110522	K:Transcription	KAF6999352.1	hypothetical protein CFC21_015395 [Triticum aestivum]	sp|Q9LY00|WRK70_ARATH;	Probable WRKY transcription factor 70 OS=Arabidopsis thaliana OX=3702 GN=WRKY70 PE=1 SV=1;	PF03106.17	WRKY	WRKY DNA -binding domain
TraesCS7B02G418400	WRKY	2.62333	0.333333	-2.97636	down	-	GO:0009751;GO:0009737;GO:0010200;GO:0009753;GO:0009611;GO:0009723;GO:0050832;GO:0006355;GO:0045892;GO:0009414;GO:0009651;GO:0009409;GO:0009938;GO:0002237;GO:0002238;GO:0009739;GO:0031347;GO:0005634;GO:0043565;GO:0003700;GO:199084	BP:response to salicylic acid;BP:response to abscisic acid;BP:response to chitin;BP:response to jasmonic acid;BP:response to wounding;BP:response to ethylene;BP:defense response to fungus;BP:regulation of transcription, DNA-templated;BP:negative regulation of transcription, DNA-templated;BP:response to water deprivation;BP:response to salt stress;BP:response to cold;BP:negative regulation of gibb…	------	------	------	------	ENOG410YHES	K:Transcription	KAF7104499.1	hypothetical protein CFC21_105392 [Triticum aestivum]	sp|Q6IEL0|WRK71_ORYSI;	WRKY transcription factor WRKY71 OS=Oryza sativa subsp. indica OX=39946 GN=WRKY71 PE=1 SV=1;	PF03106.17	WRKY	WRKY DNA -binding domain
TraesCSU02G070700	ZF-HD	3.39	1.47	-1.20547	down	-	GO:0006355;GO:0005634;GO:0003700;GO:0000976;GO:000367	BP:regulation of transcription, DNA-templated;CC:nucleus;MF:transcription factor activity, sequence-specific DNA binding;MF:transcription regulatory region sequence-specific DNA binding;MF:DNA binding;	------	------	------	------	ENOG410ZMEG	S:Function unknown	KAF7052379.1	hypothetical protein CFC21_060486 [Triticum aestivum]	sp|A2XLF4|ZHD11_ORYSI;	Zinc-finger homeodomain protein 11 OS=Oryza sativa subsp. indica OX=39946 GN=ZHD11 PE=3 SV=1;	PF04770.14	ZF-HD_dimer	ZF-HD protein dimerisation region

## Sheet: Table S5-3
Table S5-3. Expression and functional annotation of TFs in Fielder_Al vs. LP.
Gene_id	TF family	Fielder_Al	Fielder_LP	Log2(FC)	Regulation	Gene_description	GO_id	GO_term	KO_id	KO_name	Pathway_id	Pathway_definition	EggNOG_id	EggNOG_Functional Categories	NR_hit-name	NR_description	Swiss-Prot_hit-name	Swiss-Prot_description	Pfam_id	Domain	Domain description
TraesCS6B02G280800	AP2	0.946667	0.306667	1.62618	up	-	GO:0006355;GO:0005634;GO:0003700;GO:000367	BP:regulation of transcription, DNA-templated;CC:nucleus;MF:transcription factor activity, sequence-specific DNA binding;MF:DNA binding;	K09286	EREBP	------	------	ENOG410Z37D;ENOG410YIK7	K:Transcription;	XP_037454446.1	ethylene-responsive transcription factor 5-like [Triticum dicoccoides]	sp|O80341|EF102_ARATH;	Ethylene-responsive transcription factor 5 OS=Arabidopsis thaliana OX=3702 GN=ERF5 PE=2 SV=1;	PF00847.22	AP2	AP2 domain
TraesCS2B02G411500	AP2	3.88333	1.31333	1.56406	up	-	GO:0006355;GO:0006351;GO:0005634;GO:0003700;GO:000367	BP:regulation of transcription, DNA-templated;BP:transcription, DNA-templated;CC:nucleus;MF:transcription factor activity, sequence-specific DNA binding;MF:DNA binding;	K14516	ERF1	map04016;map04075	MAPK signaling pathway - plant;Plant hormone signal transduction	ENOG4111E8T;ENOG410YJNR	K:Transcription;	KAF7010298.1	hypothetical protein CFC21_024721 [Triticum aestivum]	sp|Q8LDC8|ERF92_ARATH;	Ethylene-responsive transcription factor 1B OS=Arabidopsis thaliana OX=3702 GN=ERF1B PE=1 SV=2;	PF00847.22	AP2	AP2 domain
TraesCS4B02G299600	AP2	14.9567	5.67333	1.39852	up	-	GO:0006355;GO:0006351;GO:0005634;GO:0003700;GO:000367	BP:regulation of transcription, DNA-templated;BP:transcription, DNA-templated;CC:nucleus;MF:transcription factor activity, sequence-specific DNA binding;MF:DNA binding;	K09286	EREBP	------	------	ENOG41103N0;ENOG41116YA	K:Transcription;S:Function unknown	KAF7050616.1	hypothetical protein CFC21_058951 [Triticum aestivum]	sp|Q8H0T5|ERF73_ARATH;	Ethylene-responsive transcription factor ERF073 OS=Arabidopsis thaliana OX=3702 GN=ERF073 PE=1 SV=2;	PF00847.22	AP2	AP2 domain
TraesCS5A02G311900	AP2	2.24667	5.29667	-1.2373	down	C-repeat binding factor 10 [Source:UniProtKB/TrEMBL;Acc:A0A1D5YFJ9]	GO:0006355;GO:0006351;GO:0005634;GO:0003700;GO:000367	BP:regulation of transcription, DNA-templated;BP:transcription, DNA-templated;CC:nucleus;MF:transcription factor activity, sequence-specific DNA binding;MF:DNA binding;	------	------	------	------	ENOG410YK37	K:Transcription	XP_037431300.1	dehydration-responsive element-binding protein 1H-like [Triticum dicoccoides]	sp|A2Z388|DRE1H_ORYSI;	Dehydration-responsive element-binding protein 1H OS=Oryza sativa subsp. indica OX=39946 GN=DREB1H PE=2 SV=1;	PF00847.22	AP2	AP2 domain
TraesCS1B02G335100	AP2	0.56	1.71333	-1.61331	down	-	GO:0006355;GO:0006351;GO:0005634;GO:0003700;GO:000367	BP:regulation of transcription, DNA-templated;BP:transcription, DNA-templated;CC:nucleus;MF:transcription factor activity, sequence-specific DNA binding;MF:DNA binding;	------	------	------	------	ENOG411074H	K:Transcription	KAF6990936.1	hypothetical protein CFC21_008079 [Triticum aestivum]	sp|Q8GUW4|DRE1B_ORYSI;	Dehydration-responsive element-binding protein 1B OS=Oryza sativa subsp. indica OX=39946 GN=DREB1B PE=2 SV=1;	PF00847.22	AP2	AP2 domain
TraesCS5B02G312700	AP2	0.316667	1.33667	-2.0776	down	CBFIIIc-3.1 (Fragment) [Source:UniProtKB/TrEMBL;Acc:A0MPJ6]	GO:0006355;GO:0006351;GO:0005634;GO:0003700;GO:000367	BP:regulation of transcription, DNA-templated;BP:transcription, DNA-templated;CC:nucleus;MF:transcription factor activity, sequence-specific DNA binding;MF:DNA binding;	------	------	------	------	ENOG410YK37	K:Transcription	ABK55361.1	CBFIIIc-3.1, partial [Triticum aestivum]	sp|A2Z388|DRE1H_ORYSI;	Dehydration-responsive element-binding protein 1H OS=Oryza sativa subsp. indica OX=39946 GN=DREB1H PE=2 SV=1;	PF00847.22	AP2	AP2 domain
TraesCS5A02G238400	AP2	0.203333	1	-2.29808	down	-	GO:0006355;GO:0006351;GO:0005634;GO:0003700;GO:000367	BP:regulation of transcription, DNA-templated;BP:transcription, DNA-templated;CC:nucleus;MF:transcription factor activity, sequence-specific DNA binding;MF:DNA binding;	------	------	------	------	ENOG410YY7D;ENOG410YN6X	K:Transcription;	KAF7059191.1	hypothetical protein CFC21_066126 [Triticum aestivum]	sp|Q9SZ06|EF109_ARATH;	Ethylene-responsive transcription factor ERF109 OS=Arabidopsis thaliana OX=3702 GN=ERF109 PE=1 SV=1;	PF00847.22	AP2	AP2 domain
TraesCS2D02G464400	AP2	0.173333	0.926667	-2.4185	down	-	GO:0006355;GO:0006351;GO:0009873;GO:0005634;GO:0003700;GO:000367	BP:regulation of transcription, DNA-templated;BP:transcription, DNA-templated;BP:ethylene-activated signaling pathway;CC:nucleus;MF:transcription factor activity, sequence-specific DNA binding;MF:DNA binding;	K14516	ERF1	map04016;map04075	MAPK signaling pathway - plant;Plant hormone signal transduction	ENOG41114BY	K:Transcription	KAF7018463.1	hypothetical protein CFC21_031753 [Triticum aestivum]	sp|Q8LDC8|ERF92_ARATH;	Ethylene-responsive transcription factor 1B OS=Arabidopsis thaliana OX=3702 GN=ERF1B PE=1 SV=2;	PF00847.22	AP2	AP2 domain
TraesCS4A02G198300	B3	3.72667	1.22333	1.60707	up	-	GO:0006355;GO:0006351;GO:0005634;GO:000367	BP:regulation of transcription, DNA-templated;BP:transcription, DNA-templated;CC:nucleus;MF:DNA binding;	------	------	------	------	ENOG410YIJZ	K:Transcription	XP_037421590.1	B3 domain-containing protein Os11g0156000-like [Triticum dicoccoides]	sp|Q53QI0|Y1160_ORYSJ;	B3 domain-containing protein Os11g0156000 OS=Oryza sativa subsp. japonica OX=39947 GN=Os11g0156000 PE=2 SV=1;	PF02362.23	B3	B3 DNA binding domain
TraesCS4D02G114900	B3	4.41333	2.17	1.02417	up	-	GO:0005634;GO:000367	CC:nucleus;MF:DNA binding;	------	------	------	------	ENOG410YIJZ	K:Transcription	KAF7053122.1	hypothetical protein CFC21_061108 [Triticum aestivum]	sp|Q53QI0|Y1160_ORYSJ;	B3 domain-containing protein Os11g0156000 OS=Oryza sativa subsp. japonica OX=39947 GN=Os11g0156000 PE=2 SV=1;	PF02362.23	B3	B3 DNA binding domain
TraesCS3B02G550200	bHLH	0.72	0.033333	4.43297	up	-	GO:0006357;GO:0003700;GO:0046983;GO:000367	BP:regulation of transcription from RNA polymerase II promoter;MF:transcription factor activity, sequence-specific DNA binding;MF:protein dimerization activity;MF:DNA binding;	------	------	------	------	ENOG410YP85;ENOG410ZMQF	K:Transcription;	XP_037415896.1	protein IRON-RELATED TRANSCRIPTION FACTOR 2-like [Triticum dicoccoides]	sp|A2WZ60|IRO2_ORYSI;	Protein IRON-RELATED TRANSCRIPTION FACTOR 2 OS=Oryza sativa subsp. indica OX=39946 GN=IRO2 PE=3 SV=1;	PF00010.28	HLH	Helix-loop-helix DNA-binding domain
TraesCS3D02G495700	bHLH	0.773333	0.08	3.27302	up	-	GO:0006357;GO:0003700;GO:0046983;GO:000367	BP:regulation of transcription from RNA polymerase II promoter;MF:transcription factor activity, sequence-specific DNA binding;MF:protein dimerization activity;MF:DNA binding;	------	------	------	------	ENOG410YP85;ENOG410ZMQF	K:Transcription;	KAF7040296.1	hypothetical protein CFC21_050206 [Triticum aestivum]	sp|A2WZ60|IRO2_ORYSI;	Protein IRON-RELATED TRANSCRIPTION FACTOR 2 OS=Oryza sativa subsp. indica OX=39946 GN=IRO2 PE=3 SV=1;	PF00010.28	HLH	Helix-loop-helix DNA-binding domain
TraesCS4D02G079500	bHLH	2.76	0.98	1.49381	up	-	GO:0006357;GO:0005634;GO:0046983;GO:0000978;GO:000098	BP:regulation of transcription from RNA polymerase II promoter;CC:nucleus;MF:protein dimerization activity;MF:RNA polymerase II core promoter proximal region sequence-specific DNA binding;MF:RNA polymerase II transcription factor activity, sequence-specific DNA binding;	------	------	------	------	ENOG410YM1P	K:Transcription	XP_037429361.1	transcription factor bHLH84-like isoform X1 [Triticum dicoccoides]	sp|Q7XHI9|BH084_ARATH;	Transcription factor bHLH84 OS=Arabidopsis thaliana OX=3702 GN=BHLH84 PE=1 SV=1;	PF00010.28	HLH	Helix-loop-helix DNA-binding domain
TraesCS7B02G075600	bZIP	2.15667	1.00333	1.104	up	bZIP transcription factor, Positive regulator of ABA signaling, Drought toleranc [Source: Projected from Oryza sativa (Os06g0211200)]	GO:0009738;GO:0006355;GO:0045893;GO:0009414;GO:0009651;GO:0009789;GO:0005634;GO:0043565;GO:000370	BP:abscisic acid-activated signaling pathway;BP:regulation of transcription, DNA-templated;BP:positive regulation of transcription, DNA-templated;BP:response to water deprivation;BP:response to salt stress;BP:positive regulation of abscisic acid-activated signaling pathway;CC:nucleus;MF:sequence-specific DNA binding;MF:transcription factor activity, sequence-specific DNA binding;	K14432	ABF	map04075	Plant hormone signal transduction	ENOG410YFZJ	K:Transcription	XP_037466480.1	bZIP transcription factor 46-like [Triticum dicoccoides]	sp|Q69TW5|BZP46_ORYSJ;	bZIP transcription factor 46 OS=Oryza sativa subsp. japonica OX=39947 GN=BZIP46 PE=1 SV=1;	PF00170.23;PF07716.17;PF03131.19	bZIP_1;bZIP_2;bZIP_Maf	bZIP transcription factor;Basic region leucine zipper;bZIP Maf transcription factor
TraesCS7A02G218600	CO-like	1.9	3.80333	-1.00126	down	-	GO:0005634;GO:0008270;GO:000551	CC:nucleus;MF:zinc ion binding;MF:protein binding;	------	------	------	------	ENOG410YA5C	S:Function unknown	XP_037460315.1	zinc finger protein CONSTANS-LIKE 9-like isoform X1 [Triticum dicoccoides]	sp|Q9SSE5|COL9_ARATH;	Zinc finger protein CONSTANS-LIKE 9 OS=Arabidopsis thaliana OX=3702 GN=COL9 PE=1 SV=1;	PF06203.16;PF00643.26	CCT;zf-B_box	CCT motif;B-box zinc finger
TraesCS7D02G220300	CO-like	1.81667	3.98333	-1.13268	down	-	GO:0005634;GO:0008270;GO:000551	CC:nucleus;MF:zinc ion binding;MF:protein binding;	------	------	------	------	ENOG410YA5C	S:Function unknown	XP_020150634.1	zinc finger protein CONSTANS-LIKE 9 isoform X1 [Aegilops tauschii subsp. strangulata]	sp|Q9SSE5|COL9_ARATH;	Zinc finger protein CONSTANS-LIKE 9 OS=Arabidopsis thaliana OX=3702 GN=COL9 PE=1 SV=1;	PF06203.16;PF00643.26	CCT;zf-B_box	CCT motif;B-box zinc finger
TraesCS3B02G210300	Dof	1.81667	0.613333	1.56655	up	-	GO:0006355;GO:0005634;GO:0003700;GO:000367	BP:regulation of transcription, DNA-templated;CC:nucleus;MF:transcription factor activity, sequence-specific DNA binding;MF:DNA binding;	------	------	------	------	ENOG410YN7N	S:Function unknown	KAF7029217.1	hypothetical protein CFC21_041022 [Triticum aestivum]	sp|Q93ZL5|CDF2_ARATH;	Cyclic dof factor 2 OS=Arabidopsis thaliana OX=3702 GN=CDF2 PE=1 SV=2;	PF02701.17	zf-Dof	Dof domain, zinc finger
TraesCS4A02G017700	Dof	7.82667	2.80333	1.48125	up	-	GO:0006355;GO:0005634;GO:0003700;GO:000367	BP:regulation of transcription, DNA-templated;CC:nucleus;MF:transcription factor activity, sequence-specific DNA binding;MF:DNA binding;	------	------	------	------	ENOG410YN7N	S:Function unknown	KAF7041128.1	hypothetical protein CFC21_050958 [Triticum aestivum]	sp|Q8W1E3|CDF1_ARATH;	Cyclic dof factor 1 OS=Arabidopsis thaliana OX=3702 GN=CDF1 PE=1 SV=2;	PF02701.17	zf-Dof	Dof domain, zinc finger
TraesCS4D02G285100	Dof	7.61333	3.27333	1.21777	up	-	GO:0006355;GO:0005634;GO:0003700;GO:000367	BP:regulation of transcription, DNA-templated;CC:nucleus;MF:transcription factor activity, sequence-specific DNA binding;MF:DNA binding;	------	------	------	------	ENOG410YN7N	S:Function unknown	XP_020166390.1	cyclic dof factor 1 [Aegilops tauschii subsp. strangulata]	sp|Q8W1E3|CDF1_ARATH;	Cyclic dof factor 1 OS=Arabidopsis thaliana OX=3702 GN=CDF1 PE=1 SV=2;	PF02701.17	zf-Dof	Dof domain, zinc finger
TraesCS3A02G180600	Dof	1.31	0.573333	1.19212	up	-	GO:0006355;GO:0005634;GO:0003700;GO:000367	BP:regulation of transcription, DNA-templated;CC:nucleus;MF:transcription factor activity, sequence-specific DNA binding;MF:DNA binding;	------	------	------	------	ENOG410YN7N	S:Function unknown	XP_037405270.1	cyclic dof factor 2-like [Triticum dicoccoides]	sp|Q93ZL5|CDF2_ARATH;	Cyclic dof factor 2 OS=Arabidopsis thaliana OX=3702 GN=CDF2 PE=1 SV=2;	PF02701.17	zf-Dof	Dof domain, zinc finger
TraesCS2B02G118000	Dof	8.11333	3.81	1.0905	up	-	GO:0006355;GO:0005634;GO:0003700;GO:000367	BP:regulation of transcription, DNA-templated;CC:nucleus;MF:transcription factor activity, sequence-specific DNA binding;MF:DNA binding;	------	------	------	------	ENOG410YN7N	S:Function unknown	XP_037483461.1	cyclic dof factor 1-like [Triticum dicoccoides]	sp|Q93ZL5|CDF2_ARATH;	Cyclic dof factor 2 OS=Arabidopsis thaliana OX=3702 GN=CDF2 PE=1 SV=2;	PF02701.17	zf-Dof	Dof domain, zinc finger
TraesCS2A02G100800	Dof	7.52333	3.67667	1.03297	up	-	GO:0006355;GO:0005634;GO:0003700;GO:000367	BP:regulation of transcription, DNA-templated;CC:nucleus;MF:transcription factor activity, sequence-specific DNA binding;MF:DNA binding;	------	------	------	------	ENOG410YN7N	S:Function unknown	XP_020181996.1	cyclic dof factor 1 isoform X1 [Aegilops tauschii subsp. strangulata]	sp|Q93ZL5|CDF2_ARATH;	Cyclic dof factor 2 OS=Arabidopsis thaliana OX=3702 GN=CDF2 PE=1 SV=2;	PF02701.17	zf-Dof	Dof domain, zinc finger
TraesCS1D02G223200	GATA	1.96	4.02667	-1.03873	down	GATA transcription factor [Source:UniProtKB/TrEMBL;Acc:A0A1D5SRH8]	GO:0030154;GO:0006355;GO:0045893;GO:0005634;GO:0043565;GO:0003700;GO:000827	BP:cell differentiation;BP:regulation of transcription, DNA-templated;BP:positive regulation of transcription, DNA-templated;CC:nucleus;MF:sequence-specific DNA binding;MF:transcription factor activity, sequence-specific DNA binding;MF:zinc ion binding;	------	------	------	------	COG5641	K:Transcription	KAF6995457.1	hypothetical protein CFC21_011954 [Triticum aestivum]	sp|O49743|GATA4_ARATH;	GATA transcription factor 4 OS=Arabidopsis thaliana OX=3702 GN=GATA4 PE=2 SV=1;	PF00320.29	GATA	GATA zinc finger
TraesCS2B02G217500	GRAS	4.75	9.80333	-1.04534	down	-	GO:0006355;GO:0005634;GO:0003700;GO:004356	BP:regulation of transcription, DNA-templated;CC:nucleus;MF:transcription factor activity, sequence-specific DNA binding;MF:sequence-specific DNA binding;	------	------	------	------	ENOG4111JS8	K:Transcription	XP_037484396.1	chitin-inducible gibberellin-responsive protein 2-like [Triticum dicoccoides]	sp|Q8GVE1|CIGR2_ORYSJ;	Chitin-inducible gibberellin-responsive protein 2 OS=Oryza sativa subsp. japonica OX=39947 GN=CIGR2 PE=2 SV=1;	PF03514.16	GRAS	GRAS domain family
TraesCS2D02G198200	GRAS	4.92333	11.6533	-1.24304	down	-	GO:0006355;GO:0005634;GO:0003700;GO:004356	BP:regulation of transcription, DNA-templated;CC:nucleus;MF:transcription factor activity, sequence-specific DNA binding;MF:sequence-specific DNA binding;	------	------	------	------	ENOG4111JS8	K:Transcription	XP_020176499.1	chitin-inducible gibberellin-responsive protein 2 [Aegilops tauschii subsp. strangulata]	sp|Q8GVE1|CIGR2_ORYSJ;	Chitin-inducible gibberellin-responsive protein 2 OS=Oryza sativa subsp. japonica OX=39947 GN=CIGR2 PE=2 SV=1;	PF03514.16	GRAS	GRAS domain family
TraesCS2A02G189600	GRAS	5.54333	13.93	-1.32937	down	-	GO:0006355;GO:0005634;GO:0003700;GO:004356	BP:regulation of transcription, DNA-templated;CC:nucleus;MF:transcription factor activity, sequence-specific DNA binding;MF:sequence-specific DNA binding;	------	------	------	------	ENOG4111JS8	K:Transcription	XP_037476600.1	chitin-inducible gibberellin-responsive protein 2-like [Triticum dicoccoides]	sp|Q8GVE1|CIGR2_ORYSJ;	Chitin-inducible gibberellin-responsive protein 2 OS=Oryza sativa subsp. japonica OX=39947 GN=CIGR2 PE=2 SV=1;	PF03514.16	GRAS	GRAS domain family
TraesCS1A02G219200	HB-other	3.69333	1.76333	1.06662	up	-	GO:0006355;GO:0005634;GO:0043565;GO:0003700;GO:0003677;GO:000098	BP:regulation of transcription, DNA-templated;CC:nucleus;MF:sequence-specific DNA binding;MF:transcription factor activity, sequence-specific DNA binding;MF:DNA binding;MF:RNA polymerase II transcription factor activity, sequence-specific DNA binding;	K09338	HD-ZIP	------	------	ENOG410Z2UE	K:Transcription	KAF6984235.1	hypothetical protein CFC21_002273 [Triticum aestivum]	sp|Q40691|HOX1_ORYSI;	Homeobox-leucine zipper protein HOX1 OS=Oryza sativa subsp. indica OX=39946 GN=HOX1 PE=1 SV=2;	PF04618.14;PF00046.31;PF02183.20;PF05920.13	HD-ZIP_N;Homeodomain;HALZ;Homeobox_KN	HD-ZIP protein N terminus;Homeodomain;Homeobox associated leucine zipper;Homeobox KN domain
TraesCS2B02G419600	HSF	2.79	0.7	1.99484	up	Similar to Heat stress transcription factor Spl7 (Heat shock transcription factor) (Heat shock factor RHSF10) [Source: Projected from Oryza sativa (Os04g0568700)]	GO:0006355;GO:0006357;GO:0005737;GO:0005634;GO:0043565;GO:0003700;GO:000097	BP:regulation of transcription, DNA-templated;BP:regulation of transcription from RNA polymerase II promoter;CC:cytoplasm;CC:nucleus;MF:sequence-specific DNA binding;MF:transcription factor activity, sequence-specific DNA binding;MF:RNA polymerase II core promoter proximal region sequence-specific DNA binding;	K09419	HSFF	------	------	COG5169	K:Transcription	XP_037486682.1	heat stress transcription factor B-2a-like [Triticum dicoccoides]	sp|Q7XRX3|HFB2A_ORYSJ;	Heat stress transcription factor B-2a OS=Oryza sativa subsp. japonica OX=39947 GN=HSFB2A PE=2 SV=2;	PF00447.19	HSF_DNA-bind	HSF-type DNA-binding
TraesCS7D02G270600	HSF	3.77667	1.20333	1.65008	up	-	GO:0006355;GO:0005634;GO:0003700;GO:004356	BP:regulation of transcription, DNA-templated;CC:nucleus;MF:transcription factor activity, sequence-specific DNA binding;MF:sequence-specific DNA binding;	K09419	HSFF	------	------	COG5169	K:Transcription	XP_040251789.1	heat stress transcription factor B-2b, partial [Aegilops tauschii subsp. strangulata]	sp|Q6Z9C8|HFB2B_ORYSJ;	Heat stress transcription factor B-2b OS=Oryza sativa subsp. japonica OX=39947 GN=HSFB2B PE=2 SV=1;	PF00447.19	HSF_DNA-bind	HSF-type DNA-binding
TraesCS2A02G401600	HSF	1.81667	0.596667	1.6063	up	Similar to Heat stress transcription factor Spl7 (Heat shock transcription factor) (Heat shock factor RHSF10) [Source: Projected from Oryza sativa (Os04g0568700)]	GO:0006355;GO:0006357;GO:0005737;GO:0005634;GO:0043565;GO:0003700;GO:000097	BP:regulation of transcription, DNA-templated;BP:regulation of transcription from RNA polymerase II promoter;CC:cytoplasm;CC:nucleus;MF:sequence-specific DNA binding;MF:transcription factor activity, sequence-specific DNA binding;MF:RNA polymerase II core promoter proximal region sequence-specific DNA binding;	K09419	HSFF	------	------	COG5169	K:Transcription	KAF7002958.1	hypothetical protein CFC21_018357 [Triticum aestivum]	sp|Q7XRX3|HFB2A_ORYSJ;	Heat stress transcription factor B-2a OS=Oryza sativa subsp. japonica OX=39947 GN=HSFB2A PE=2 SV=2;	PF00447.19	HSF_DNA-bind	HSF-type DNA-binding
TraesCS7A02G270100	HSF	2.66667	1.01667	1.39119	up	Heat-responsive transcription factor [Source:UniProtKB/TrEMBL;Acc:A0A0D3QT57]	GO:0006355;GO:0006357;GO:0005634;GO:0043565;GO:0003700;GO:0003677;GO:000097	BP:regulation of transcription, DNA-templated;BP:regulation of transcription from RNA polymerase II promoter;CC:nucleus;MF:sequence-specific DNA binding;MF:transcription factor activity, sequence-specific DNA binding;MF:DNA binding;MF:RNA polymerase II core promoter proximal region sequence-specific DNA binding;	K09419	HSFF	------	------	COG5169	K:Transcription	XP_040251789.1	heat stress transcription factor B-2b, partial [Aegilops tauschii subsp. strangulata]	sp|Q6Z9C8|HFB2B_ORYSJ;	Heat stress transcription factor B-2b OS=Oryza sativa subsp. japonica OX=39947 GN=HSFB2B PE=2 SV=1;	PF00447.19	HSF_DNA-bind	HSF-type DNA-binding
TraesCS2D02G399000	HSF	1.72333	0.686667	1.32752	up	Similar to Heat stress transcription factor Spl7 (Heat shock transcription factor) (Heat shock factor RHSF10) [Source: Projected from Oryza sativa (Os04g0568700)]	GO:0006355;GO:0006357;GO:0005737;GO:0005634;GO:0043565;GO:0003700;GO:0003677;GO:000097	BP:regulation of transcription, DNA-templated;BP:regulation of transcription from RNA polymerase II promoter;CC:cytoplasm;CC:nucleus;MF:sequence-specific DNA binding;MF:transcription factor activity, sequence-specific DNA binding;MF:DNA binding;MF:RNA polymerase II core promoter proximal region sequence-specific DNA binding;	K09419	HSFF	------	------	COG5169	K:Transcription	XP_020152813.1	heat stress transcription factor B-2a [Aegilops tauschii subsp. strangulata]	sp|Q7XRX3|HFB2A_ORYSJ;	Heat stress transcription factor B-2a OS=Oryza sativa subsp. japonica OX=39947 GN=HSFB2A PE=2 SV=2;	PF00447.19	HSF_DNA-bind	HSF-type DNA-binding
TraesCS1B02G396000	HSF	11.2633	4.77667	1.23756	up	-	GO:0006355;GO:0006357;GO:0034605;GO:0005634;GO:0043565;GO:0003700;GO:0000978;GO:004280	BP:regulation of transcription, DNA-templated;BP:regulation of transcription from RNA polymerase II promoter;BP:cellular response to heat;CC:nucleus;MF:sequence-specific DNA binding;MF:transcription factor activity, sequence-specific DNA binding;MF:RNA polymerase II core promoter proximal region sequence-specific DNA binding;MF:identical protein binding;	K09419;K08967	HSFF;mtnD, mtnZ, ADI1	map00270	Cysteine and methionine metabolism	COG5169	K:Transcription	KAF6991613.1	hypothetical protein CFC21_008682 [Triticum aestivum]	sp|Q338B0|HFA2C_ORYSJ;	Heat stress transcription factor A-2c OS=Oryza sativa subsp. japonica OX=39947 GN=HSFA2C PE=1 SV=2;	PF00447.19	HSF_DNA-bind	HSF-type DNA-binding
TraesCS3B02G568300	HSF	1.58667	4.82333	-1.60403	down	-	GO:0006355;GO:0006357;GO:0034605;GO:0005634;GO:0043565;GO:0003700;GO:0003677;GO:000097	BP:regulation of transcription, DNA-templated;BP:regulation of transcription from RNA polymerase II promoter;BP:cellular response to heat;CC:nucleus;MF:sequence-specific DNA binding;MF:transcription factor activity, sequence-specific DNA binding;MF:DNA binding;MF:RNA polymerase II core promoter proximal region sequence-specific DNA binding;	K09419	HSFF	------	------	COG5169	K:Transcription	KAF7033550.1	hypothetical protein CFC21_044633 [Triticum aestivum]	sp|Q0DBL6|HFC2B_ORYSJ;	Heat stress transcription factor C-2b OS=Oryza sativa subsp. japonica OX=39947 GN=HSFC2B PE=3 SV=1;	PF00447.19	HSF_DNA-bind	HSF-type DNA-binding
TraesCS2B02G289800	LBD	15.1267	6.32	1.2591	up	LOB domain-containing protein 41 [Source:Projected from Arabidopsis thaliana (AT3G02550) UniProtKB/Swiss-Prot;Acc:Q9M886]	GO:000727	BP:multicellular organism development;	------	------	------	------	ENOG410YBK4	S:Function unknown	KAE8805633.1	LOB domain-containing protein 40 [Hordeum vulgare]	sp|Q9M886|LBD41_ARATH;	LOB domain-containing protein 41 OS=Arabidopsis thaliana OX=3702 GN=LBD41 PE=2 SV=1;	PF03195.16	LOB	Lateral organ boundaries
TraesCS2A02G271300	LBD	14.5233	6.36667	1.18976	up	LOB domain-containing protein 41 [Source:Projected from Arabidopsis thaliana (AT3G02550) UniProtKB/Swiss-Prot;Acc:Q9M886]	GO:0006355;GO:0007275;GO:001046	BP:regulation of transcription, DNA-templated;BP:multicellular organism development;BP:regulation of gene expression;	------	------	------	------	ENOG410YBK4	S:Function unknown	XP_037477493.1	LOB domain-containing protein 40-like [Triticum dicoccoides]	sp|Q9M886|LBD41_ARATH;	LOB domain-containing protein 41 OS=Arabidopsis thaliana OX=3702 GN=LBD41 PE=2 SV=1;	PF03195.16	LOB	Lateral organ boundaries
TraesCS2D02G270100	LBD	7.98	3.65667	1.12586	up	LOB domain-containing protein 41 [Source:Projected from Arabidopsis thaliana (AT3G02550) UniProtKB/Swiss-Prot;Acc:Q9M886]	GO:0006355;GO:0010468;GO:000727	BP:regulation of transcription, DNA-templated;BP:regulation of gene expression;BP:multicellular organism development;	------	------	------	------	ENOG410YBK4	S:Function unknown	XP_020176408.1	LOB domain-containing protein 40 [Aegilops tauschii subsp. strangulata]	sp|Q9M886|LBD41_ARATH;	LOB domain-containing protein 41 OS=Arabidopsis thaliana OX=3702 GN=LBD41 PE=2 SV=1;	PF03195.16	LOB	Lateral organ boundaries
TraesCS4A02G474100	MYB	4.72333	1.51	1.64526	up	-	GO:0005634;GO:000367	CC:nucleus;MF:DNA binding;	------	------	------	------	COG5269;ENOG4111HV1	K:Transcription;	KAF7046592.1	hypothetical protein CFC21_055614 [Triticum aestivum]	sp|Q8RWU3|RVE8_ARATH;	Protein REVEILLE 8 OS=Arabidopsis thaliana OX=3702 GN=RVE8 PE=2 SV=1;	PF00249.33	Myb_DNA-binding	Myb-like DNA-binding domain
TraesCS7D02G295400	MYB	23.4467	7.78	1.59154	up	-	GO:0005634;GO:000367	CC:nucleus;MF:DNA binding;	K12133	LHY	map04712	Circadian rhythm - plant	ENOG4111X77	K:Transcription	KAF7109084.1	hypothetical protein CFC21_109398 [Triticum aestivum]	sp|A0A0G3VTN5|LHY_PETHY;	Protein LATE ELONGATED HYPOCOTYL OS=Petunia hybrida OX=4102 GN=LHY PE=2 SV=1;	PF00249.33	Myb_DNA-binding	Myb-like DNA-binding domain
TraesCS7A02G299400	MYB	29.8967	13.2233	1.1769	up	-	GO:0005634;GO:000367	CC:nucleus;MF:DNA binding;	K12133	LHY	map04712	Circadian rhythm - plant	ENOG4111X77	K:Transcription	KAF7096025.1	hypothetical protein CFC21_098040 [Triticum aestivum]	sp|A0A0G3VTN5|LHY_PETHY;	Protein LATE ELONGATED HYPOCOTYL OS=Petunia hybrida OX=4102 GN=LHY PE=2 SV=1;	PF00249.33	Myb_DNA-binding	Myb-like DNA-binding domain
TraesCS7B02G188000	MYB	34.83	15.41	1.17646	up	-	GO:0005634;GO:000367	CC:nucleus;MF:DNA binding;	K12133	LHY	map04712	Circadian rhythm - plant	ENOG4111X77	K:Transcription	KAF7101644.1	hypothetical protein CFC21_102912 [Triticum aestivum]	sp|A0A0G3VTN5|LHY_PETHY;	Protein LATE ELONGATED HYPOCOTYL OS=Petunia hybrida OX=4102 GN=LHY PE=2 SV=1;	PF00249.33	Myb_DNA-binding	Myb-like DNA-binding domain
TraesCS7A02G017600	MYB	2.70667	1.23333	1.13396	up	-	GO:0005634;GO:000367	CC:nucleus;MF:DNA binding;	------	------	------	------	COG5269;ENOG4111HV1	K:Transcription;	XP_037458678.1	protein REVEILLE 8-like isoform X1 [Triticum dicoccoides]	sp|Q8RWU3|RVE8_ARATH;	Protein REVEILLE 8 OS=Arabidopsis thaliana OX=3702 GN=RVE8 PE=2 SV=1;	PF00249.33	Myb_DNA-binding	Myb-like DNA-binding domain
TraesCS3A02G526600	MYB	0.113333	1.10333	-3.28323	down	LUX-A [Source:UniProtKB/TrEMBL;Acc:W0M071]	GO:0006355;GO:0005634;GO:0003700;GO:000367	BP:regulation of transcription, DNA-templated;CC:nucleus;MF:transcription factor activity, sequence-specific DNA binding;MF:DNA binding;	------	------	------	------	ENOG410XXJ3	K:Transcription	AHG29010.1	LUX-A [Triticum aestivum]	sp|Q94DH3|PCL1_ORYSJ;	Transcription factor PCL1 OS=Oryza sativa subsp. japonica OX=39947 GN=PCL1 PE=2 SV=1;	PF00249.33	Myb_DNA-binding	Myb-like DNA-binding domain
TraesCS7A02G553800	MYB	14.0667	6.58333	1.09539	up	-	GO:0005634;GO:000367	CC:nucleus;MF:DNA binding;	------	------	------	------	ENOG4111HV1	K:Transcription	XP_037460342.1	protein LHY-like isoform X1 [Triticum dicoccoides]	sp|F4K5X6|RVE2_ARATH;	Protein REVEILLE 2 OS=Arabidopsis thaliana OX=3702 GN=RVE2 PE=1 SV=1;	PF00249.33;PF13921.8	Myb_DNA-binding;Myb_DNA-bind_6	Myb-like DNA-binding domain;Myb-like DNA-binding domain
TraesCS7D02G540700	MYB	13.9733	6.62	1.07777	up	-	GO:0005634;GO:000367	CC:nucleus;MF:DNA binding;	------	------	------	------	ENOG4111HV1	K:Transcription	XP_020180978.1	protein LHY isoform X1 [Aegilops tauschii subsp. strangulata]	sp|F4K5X6|RVE2_ARATH;	Protein REVEILLE 2 OS=Arabidopsis thaliana OX=3702 GN=RVE2 PE=1 SV=1;	PF00249.33;PF13921.8;PF15963.7	Myb_DNA-binding;Myb_DNA-bind_6;Myb_DNA-bind_7	Myb-like DNA-binding domain;Myb-like DNA-binding domain;Myb DNA-binding like
TraesCS6D02G362900	NAC	7.10333	3.34	1.08865	up	-	GO:0006355;GO:0005634;GO:000367	BP:regulation of transcription, DNA-templated;CC:nucleus;MF:DNA binding;	------	------	------	------	ENOG410YD3I	S:Function unknown	KAF7091916.1	hypothetical protein CFC21_094457 [Triticum aestivum]	sp|Q9FLR3|NAC79_ARATH;	NAC domain-containing protein 79 OS=Arabidopsis thaliana OX=3702 GN=NAC079 PE=2 SV=1;	PF02365.17	NAM	No apical meristem
TraesCS6D02G285600	TCP	1.14	2.38	-1.06193	down	-	GO:000370	MF:transcription factor activity, sequence-specific DNA binding;	------	------	------	------	ENOG410YEAM	K:Transcription	XP_020179888.1	transcription factor TCP14 [Aegilops tauschii subsp. strangulata]	sp|Q93Z00|TCP14_ARATH;	Transcription factor TCP14 OS=Arabidopsis thaliana OX=3702 GN=TCP14 PE=1 SV=1;	PF03634.15	TCP	TCP family transcription factor
TraesCS5B02G401800	WRKY	1.19	0.32	1.89482	up	WRKY DNA-binding protein 58 [Source:Projected from Arabidopsis thaliana (AT3G01080) UniProtKB/TrEMBL;Acc:A0A1I9LLS8]	GO:0006355;GO:0005634;GO:0003700;GO:004356	BP:regulation of transcription, DNA-templated;CC:nucleus;MF:transcription factor activity, sequence-specific DNA binding;MF:sequence-specific DNA binding;	------	------	------	------	ENOG4110JQH;ENOG41104VV	S:Function unknown;	KAF7067777.1	hypothetical protein CFC21_073619 [Triticum aestivum]	sp|Q6B6R4|WRK24_ORYSI;	WRKY transcription factor WRKY24 OS=Oryza sativa subsp. indica OX=39946 GN=WRKY24 PE=2 SV=1;	PF03106.17	WRKY	WRKY DNA -binding domain
TraesCS5A02G396800	WRKY	1.95333	0.91	1.102	up	WRKY DNA-binding protein 58 [Source:Projected from Arabidopsis thaliana (AT3G01080) UniProtKB/TrEMBL;Acc:A0A1I9LLS8]	GO:0006355;GO:0005634;GO:0003700;GO:004356	BP:regulation of transcription, DNA-templated;CC:nucleus;MF:transcription factor activity, sequence-specific DNA binding;MF:sequence-specific DNA binding;	------	------	------	------	ENOG4110JQH;ENOG41104VV	S:Function unknown;	KAF7061024.1	hypothetical protein CFC21_067754 [Triticum aestivum]	sp|Q9XI90|WRKY4_ARATH;	Probable WRKY transcription factor 4 OS=Arabidopsis thaliana OX=3702 GN=WRKY4 PE=1 SV=2;	PF03106.17	WRKY	WRKY DNA -binding domain
TraesCS7B02G418500	WRKY	1.29333	2.75333	-1.09009	down	-	GO:0009414;GO:0009651;GO:0031347;GO:0009751;GO:0009753;GO:0009611;GO:0050832;GO:0045892;GO:0009409;GO:0009737;GO:0010200;GO:0050896;GO:0009723;GO:0006355;GO:0002237;GO:0009938;GO:0002238;GO:0009739;GO:0005634;GO:0003677;GO:0043565;GO:1990841;GO:000370	BP:response to water deprivation;BP:response to salt stress;BP:regulation of defense response;BP:response to salicylic acid;BP:response to jasmonic acid;BP:response to wounding;BP:defense response to fungus;BP:negative regulation of transcription, DNA-templated;BP:response to cold;BP:response to abscisic acid;BP:response to chitin;BP:response to stimulus;BP:response to ethylene;BP:regulation of t…	------	------	------	------	ENOG410YHES	K:Transcription	KAF7104501.1	hypothetical protein CFC21_105393 [Triticum aestivum]	sp|Q6IEL0|WRK71_ORYSI;	WRKY transcription factor WRKY71 OS=Oryza sativa subsp. indica OX=39946 GN=WRKY71 PE=1 SV=1;	PF03106.17	WRKY	WRKY DNA -binding domain
TraesCS7A02G338500	WRKY	0.543333	1.56333	-1.52472	down	-	GO:0006355;GO:0050896;GO:0005634;GO:0043565;GO:0003700;GO:000367	BP:regulation of transcription, DNA-templated;BP:response to stimulus;CC:nucleus;MF:sequence-specific DNA binding;MF:transcription factor activity, sequence-specific DNA binding;MF:DNA binding;	------	------	------	------	ENOG410YZZY	K:Transcription	XP_037462379.1	probable WRKY transcription factor 70 [Triticum dicoccoides]	sp|Q9SKD9|WRK46_ARATH;	Probable WRKY transcription factor 46 OS=Arabidopsis thaliana OX=3702 GN=WRKY46 PE=1 SV=1;	PF03106.17	WRKY	WRKY DNA -binding domain
TraesCS4B02G050800	ZF-HD	2.05333	0.623333	1.71989	up	-	GO:0006355;GO:0005634;GO:0003700;GO:0000976;GO:000367	BP:regulation of transcription, DNA-templated;CC:nucleus;MF:transcription factor activity, sequence-specific DNA binding;MF:transcription regulatory region sequence-specific DNA binding;MF:DNA binding;	------	------	------	------	ENOG410ZMEG	S:Function unknown	XP_037427705.1	zinc-finger homeodomain protein 11-like [Triticum dicoccoides]	sp|A2XLF4|ZHD11_ORYSI;	Zinc-finger homeodomain protein 11 OS=Oryza sativa subsp. indica OX=39946 GN=ZHD11 PE=3 SV=1;	PF04770.14	ZF-HD_dimer	ZF-HD protein dimerisation region

## Sheet: Table S5-4
Table S5-4. Expression and functional annotation of TFs in Ardito_Al vs. CK.
Gene_id	TF family	Ardito_CK	Ardito_Al	Log2(FC)	Regulation	Gene_description	GO_id	GO_term	KO_id	KO_name	Pathway_id	Pathway_definition	EggNOG_id	EggNOG_Functional Categories	NR_hit-name	NR_description	Swiss-Prot_hit-name	Swiss-Prot_description	Pfam_id	Domain	Domain description
TraesCS5B02G311400	AP2	0.076667	1.55	4.33752	up	-	GO:0006355;GO:0005634;GO:0003700;GO:000367	BP:regulation of transcription, DNA-templated;CC:nucleus;MF:transcription factor activity, sequence-specific DNA binding;MF:DNA binding;	------	------	------	------	ENOG411074H	K:Transcription	KAF7066747.1	hypothetical protein CFC21_072686 [Triticum aestivum]	sp|Q3T5N4|DRE1B_ORYSJ;	Dehydration-responsive element-binding protein 1B OS=Oryza sativa subsp. japonica OX=39947 GN=DREB1B PE=2 SV=1;	PF00847.22	AP2	AP2 domain
TraesCS7D02G147200	AP2	0.12	1.12	3.22239	up	-	GO:0006355;GO:0006351;GO:0005634;GO:0003700;GO:000367	BP:regulation of transcription, DNA-templated;BP:transcription, DNA-templated;CC:nucleus;MF:transcription factor activity, sequence-specific DNA binding;MF:DNA binding;	------	------	------	------	ENOG41113TS;ENOG4111RRZ	K:Transcription;	KAF7107189.1	hypothetical protein CFC21_107854 [Triticum aestivum]	sp|Q94AW5|ERF03_ARATH;	Ethylene-responsive transcription factor ERF003 OS=Arabidopsis thaliana OX=3702 GN=ERF003 PE=1 SV=1;	PF00847.22	AP2	AP2 domain
TraesCS5A02G310700	AP2	0.623333	4.99333	3.00193	up	-	GO:0006355;GO:0006351;GO:0005634;GO:0003700;GO:000367	BP:regulation of transcription, DNA-templated;BP:transcription, DNA-templated;CC:nucleus;MF:transcription factor activity, sequence-specific DNA binding;MF:DNA binding;	------	------	------	------	ENOG411074H	K:Transcription	VAI20025.1	unnamed protein product [Triticum turgidum subsp. durum]	sp|Q3T5N4|DRE1B_ORYSJ;	Dehydration-responsive element-binding protein 1B OS=Oryza sativa subsp. japonica OX=39947 GN=DREB1B PE=2 SV=1;	PF00847.22	AP2	AP2 domain
TraesCS5A02G310500	AP2	2.1	5.63	1.42275	up	CBFIVd-A22 [Source:UniProtKB/TrEMBL;Acc:A0MPM3]	GO:0006355;GO:0006351;GO:0005634;GO:0003700;GO:000367	BP:regulation of transcription, DNA-templated;BP:transcription, DNA-templated;CC:nucleus;MF:transcription factor activity, sequence-specific DNA binding;MF:DNA binding;	------	------	------	------	ENOG411074H	K:Transcription	ABK55388.1	CBFIVd-A22 [Triticum aestivum]	sp|Q8GUW4|DRE1B_ORYSI;	Dehydration-responsive element-binding protein 1B OS=Oryza sativa subsp. indica OX=39946 GN=DREB1B PE=2 SV=1;	PF00847.22	AP2	AP2 domain
TraesCS5B02G311300	AP2	2.67667	7.03333	1.39377	up	-	GO:0006355;GO:0005634;GO:0003700;GO:000367	BP:regulation of transcription, DNA-templated;CC:nucleus;MF:transcription factor activity, sequence-specific DNA binding;MF:DNA binding;	------	------	------	------	ENOG411074H	K:Transcription	KAF7066745.1	hypothetical protein CFC21_072684, partial [Triticum aestivum]	sp|Q8GUW4|DRE1B_ORYSI;	Dehydration-responsive element-binding protein 1B OS=Oryza sativa subsp. indica OX=39946 GN=DREB1B PE=2 SV=1;	PF00847.22	AP2	AP2 domain
TraesCS7D02G127600	AP2	32.35	14.5533	-1.15242	down	-	GO:0006355;GO:0006351;GO:0005634;GO:0003700;GO:000367	BP:regulation of transcription, DNA-templated;BP:transcription, DNA-templated;CC:nucleus;MF:transcription factor activity, sequence-specific DNA binding;MF:DNA binding;	K09286	EREBP	------	------	ENOG410YR77;ENOG41116MV	K:Transcription;	KAF7106959.1	hypothetical protein CFC21_107660 [Triticum aestivum]	sp|Q8W3M3|RAP29_ARATH;	Ethylene-responsive transcription factor RAP2-9 OS=Arabidopsis thaliana OX=3702 GN=RAP2-9 PE=2 SV=1;	PF00847.22	AP2	AP2 domain
TraesCS7B02G401400	AP2	5.30333	2.24667	-1.23911	down	AP2-like ethylene-responsive transcription factor AIL5 [Source:Projected from Arabidopsis thaliana (AT5G57390) UniProtKB/Swiss-Prot;Acc:Q6PQQ3]	GO:0006355;GO:0006351;GO:0005634;GO:0003700;GO:000367	BP:regulation of transcription, DNA-templated;BP:transcription, DNA-templated;CC:nucleus;MF:transcription factor activity, sequence-specific DNA binding;MF:DNA binding;	K09285	OVM, ANT	------	------	ENOG410Y90A	K:Transcription	XP_037466699.1	AP2-like ethylene-responsive transcription factor AIL5 [Triticum dicoccoides]	sp|Q6PQQ3|AIL5_ARATH;	AP2-like ethylene-responsive transcription factor AIL5 OS=Arabidopsis thaliana OX=3702 GN=AIL5 PE=2 SV=2;	PF00847.22	AP2	AP2 domain
TraesCS4B02G299700	AP2	137.33	58.11	-1.24079	down	-	GO:0006355;GO:0006351;GO:0005634;GO:0003700;GO:000367	BP:regulation of transcription, DNA-templated;BP:transcription, DNA-templated;CC:nucleus;MF:transcription factor activity, sequence-specific DNA binding;MF:DNA binding;	K09286	EREBP	------	------	ENOG41103N0	K:Transcription	KAF7050617.1	hypothetical protein CFC21_058952 [Triticum aestivum]	sp|P42736|RAP23_ARATH;	Ethylene-responsive transcription factor RAP2-3 OS=Arabidopsis thaliana OX=3702 GN=RAP2-3 PE=1 SV=2;	PF00847.22	AP2	AP2 domain
TraesCS4A02G005400	AP2	29.2767	11.0467	-1.40614	down	-	GO:0006355;GO:0006351;GO:0005634;GO:0003700;GO:000367	BP:regulation of transcription, DNA-templated;BP:transcription, DNA-templated;CC:nucleus;MF:transcription factor activity, sequence-specific DNA binding;MF:DNA binding;	K09286	EREBP	------	------	ENOG41103N0	K:Transcription	KAF7040977.1	hypothetical protein CFC21_050832 [Triticum aestivum]	sp|P42736|RAP23_ARATH;	Ethylene-responsive transcription factor RAP2-3 OS=Arabidopsis thaliana OX=3702 GN=RAP2-3 PE=1 SV=2;	PF00847.22	AP2	AP2 domain
TraesCS7D02G372700	AP2	3.76	1.34667	-1.48134	down	-	GO:0006355;GO:0006351;GO:0005634;GO:0003700;GO:000367	BP:regulation of transcription, DNA-templated;BP:transcription, DNA-templated;CC:nucleus;MF:transcription factor activity, sequence-specific DNA binding;MF:DNA binding;	------	------	------	------	ENOG4111RRZ	K:Transcription	XP_020193157.1	ethylene-responsive transcription factor WIN1 [Aegilops tauschii subsp. strangulata]	sp|Q9XI33|WIN1_ARATH;	Ethylene-responsive transcription factor WIN1 OS=Arabidopsis thaliana OX=3702 GN=WIN1 PE=2 SV=1;	PF00847.22	AP2	AP2 domain
TraesCS4A02G005500	AP2	28.3267	10.14	-1.4821	down	-	GO:0006355;GO:0009873;GO:0005634;GO:0003700;GO:000367	BP:regulation of transcription, DNA-templated;BP:ethylene-activated signaling pathway;CC:nucleus;MF:transcription factor activity, sequence-specific DNA binding;MF:DNA binding;	K09286	EREBP	------	------	ENOG41103N0	K:Transcription	KAF7040986.1	hypothetical protein CFC21_050838 [Triticum aestivum]	sp|P42736|RAP23_ARATH;	Ethylene-responsive transcription factor RAP2-3 OS=Arabidopsis thaliana OX=3702 GN=RAP2-3 PE=1 SV=2;	PF00847.22	AP2	AP2 domain
TraesCS4D02G298600	AP2	94.56	33.7933	-1.48449	down	-	GO:0006355;GO:0006351;GO:0005634;GO:0003700;GO:000367	BP:regulation of transcription, DNA-templated;BP:transcription, DNA-templated;CC:nucleus;MF:transcription factor activity, sequence-specific DNA binding;MF:DNA binding;	K09286	EREBP	------	------	ENOG41103N0	K:Transcription	XP_020163641.1	ethylene-responsive transcription factor ERF073 [Aegilops tauschii subsp. strangulata]	sp|P42736|RAP23_ARATH;	Ethylene-responsive transcription factor RAP2-3 OS=Arabidopsis thaliana OX=3702 GN=RAP2-3 PE=1 SV=2;	PF00847.22	AP2	AP2 domain
TraesCS1D02G376800	AP2	1.92	0.623333	-1.62303	down	-	GO:0006355;GO:0006351;GO:0005634;GO:0003700;GO:000367	BP:regulation of transcription, DNA-templated;BP:transcription, DNA-templated;CC:nucleus;MF:transcription factor activity, sequence-specific DNA binding;MF:DNA binding;	------	------	------	------	ENOG410YN6X;ENOG410YY7D	K:Transcription;	KAF6997261.1	hypothetical protein CFC21_013504 [Triticum aestivum]	sp|Q9SZ06|EF109_ARATH;	Ethylene-responsive transcription factor ERF109 OS=Arabidopsis thaliana OX=3702 GN=ERF109 PE=1 SV=1;	PF00847.22	AP2	AP2 domain
TraesCS6A02G125700	AP2	3.63333	1.03	-1.81865	down	-	GO:0006355;GO:0005634;GO:0003700;GO:000367	BP:regulation of transcription, DNA-templated;CC:nucleus;MF:transcription factor activity, sequence-specific DNA binding;MF:DNA binding;	K09285	OVM, ANT	------	------	ENOG410Y9PK	K:Transcription	KAF7078174.1	hypothetical protein CFC21_082650 [Triticum aestivum]	sp|Q94AN4|AP2L1_ARATH;	AP2-like ethylene-responsive transcription factor At1g16060 OS=Arabidopsis thaliana OX=3702 GN=At1g16060 PE=2 SV=1;	PF00847.22	AP2	AP2 domain
TraesCS7B02G162100	AP2	13.1967	3.72333	-1.82551	down	-	GO:0006426;GO:0006355;GO:0006351;GO:0006004;GO:0005737;GO:0005634;GO:0016021;GO:0004820;GO:0003700;GO:0016740;GO:0003677;GO:000552	BP:glycyl-tRNA aminoacylation;BP:regulation of transcription, DNA-templated;BP:transcription, DNA-templated;BP:fucose metabolic process;CC:cytoplasm;CC:nucleus;CC:integral component of membrane;MF:glycine-tRNA ligase activity;MF:transcription factor activity, sequence-specific DNA binding;MF:transferase activity;MF:DNA binding;MF:ATP binding;	------	------	------	------	ENOG410YY7D;ENOG4111F2S;ENOG41108T3	K:Transcription;S:Function unknown;S:Function unknown	XP_037469401.1	ethylene-responsive transcription factor RAP2-6-like [Triticum dicoccoides]	sp|Q9FGF8|ABR1_ARATH;	Ethylene-responsive transcription factor ABR1 OS=Arabidopsis thaliana OX=3702 GN=ABR1 PE=2 SV=1;	PF00847.22	AP2	AP2 domain
TraesCS7A02G264100	AP2	8.50333	2.12667	-1.99943	down	Ethylene-responsive transcription factor ERF114 [Source:Projected from Arabidopsis thaliana (AT5G61890) UniProtKB/Swiss-Prot;Acc:Q9FH54]	GO:0006426;GO:0006355;GO:0006351;GO:0006004;GO:0005737;GO:0005634;GO:0016021;GO:0004820;GO:0003700;GO:0016740;GO:0003677;GO:000552	BP:glycyl-tRNA aminoacylation;BP:regulation of transcription, DNA-templated;BP:transcription, DNA-templated;BP:fucose metabolic process;CC:cytoplasm;CC:nucleus;CC:integral component of membrane;MF:glycine-tRNA ligase activity;MF:transcription factor activity, sequence-specific DNA binding;MF:transferase activity;MF:DNA binding;MF:ATP binding;	------	------	------	------	ENOG410YY7D;ENOG4111F2S;ENOG41108T3	K:Transcription;S:Function unknown;S:Function unknown	VAI74499.1	unnamed protein product [Triticum turgidum subsp. durum]	sp|Q9FGF8|ABR1_ARATH;	Ethylene-responsive transcription factor ABR1 OS=Arabidopsis thaliana OX=3702 GN=ABR1 PE=2 SV=1;	PF00847.22	AP2	AP2 domain
TraesCS7D02G265000	AP2	4.24667	1.01333	-2.06722	down	Ethylene-responsive transcription factor ERF114 [Source:Projected from Arabidopsis thaliana (AT5G61890) UniProtKB/Swiss-Prot;Acc:Q9FH54]	GO:0006426;GO:0006355;GO:0006351;GO:0006004;GO:0005737;GO:0005634;GO:0016021;GO:0004820;GO:0003700;GO:0016740;GO:0003677;GO:000552	BP:glycyl-tRNA aminoacylation;BP:regulation of transcription, DNA-templated;BP:transcription, DNA-templated;BP:fucose metabolic process;CC:cytoplasm;CC:nucleus;CC:integral component of membrane;MF:glycine-tRNA ligase activity;MF:transcription factor activity, sequence-specific DNA binding;MF:transferase activity;MF:DNA binding;MF:ATP binding;	------	------	------	------	ENOG410YY7D;ENOG4111F2S;ENOG41108T3	K:Transcription;S:Function unknown;S:Function unknown	XP_020188611.1	ethylene-responsive transcription factor RAP2-6 [Aegilops tauschii subsp. strangulata]	sp|Q9FGF8|ABR1_ARATH;	Ethylene-responsive transcription factor ABR1 OS=Arabidopsis thaliana OX=3702 GN=ABR1 PE=2 SV=1;	PF00847.22	AP2	AP2 domain
TraesCS3B02G412500	AP2	1.10667	0.24	-2.20511	down	-	GO:0006355;GO:0006351;GO:0009873;GO:0005634;GO:0003700;GO:000367	BP:regulation of transcription, DNA-templated;BP:transcription, DNA-templated;BP:ethylene-activated signaling pathway;CC:nucleus;MF:transcription factor activity, sequence-specific DNA binding;MF:DNA binding;	------	------	------	------	ENOG410YYVP	K:Transcription	XP_037414946.1	ethylene-responsive transcription factor ABR1-like [Triticum dicoccoides]	sp|Q70II3|EF110_ARATH;	Ethylene-responsive transcription factor ERF110 OS=Arabidopsis thaliana OX=3702 GN=ERF110 PE=2 SV=2;	PF00847.22	AP2	AP2 domain
TraesCS4B02G299600	AP2	24.0433	4.77	-2.33358	down	-	GO:0006355;GO:0006351;GO:0005634;GO:0003700;GO:000367	BP:regulation of transcription, DNA-templated;BP:transcription, DNA-templated;CC:nucleus;MF:transcription factor activity, sequence-specific DNA binding;MF:DNA binding;	K09286	EREBP	------	------	ENOG41103N0;ENOG41116YA	K:Transcription;S:Function unknown	KAF7050616.1	hypothetical protein CFC21_058951 [Triticum aestivum]	sp|Q8H0T5|ERF73_ARATH;	Ethylene-responsive transcription factor ERF073 OS=Arabidopsis thaliana OX=3702 GN=ERF073 PE=1 SV=2;	PF00847.22	AP2	AP2 domain
TraesCS2A02G393500	AP2	1.67	0.323333	-2.36876	down	-	GO:0006355;GO:0006351;GO:0005634;GO:0003700;GO:000367	BP:regulation of transcription, DNA-templated;BP:transcription, DNA-templated;CC:nucleus;MF:transcription factor activity, sequence-specific DNA binding;MF:DNA binding;	K14516	ERF1	map04016;map04075	MAPK signaling pathway - plant;Plant hormone signal transduction	ENOG4111E8T;ENOG410YJNR	K:Transcription;	KAF7002872.1	hypothetical protein CFC21_018284 [Triticum aestivum]	sp|Q8LDC8|ERF92_ARATH;	Ethylene-responsive transcription factor 1B OS=Arabidopsis thaliana OX=3702 GN=ERF1B PE=1 SV=2;	PF00847.22	AP2	AP2 domain
TraesCS5A02G308000	AP2	2.10333	0.313333	-2.74691	down	-	GO:0006355;GO:0006351;GO:0005634;GO:0003700;GO:000367	BP:regulation of transcription, DNA-templated;BP:transcription, DNA-templated;CC:nucleus;MF:transcription factor activity, sequence-specific DNA binding;MF:DNA binding;	K14516	ERF1	map04016;map04075	MAPK signaling pathway - plant;Plant hormone signal transduction	ENOG410ZM5Q	K:Transcription	KAF7059994.1	hypothetical protein CFC21_066822 [Triticum aestivum]	sp|A0A3Q7I5Y9|ERFC3_SOLLC;	Ethylene-response factor C3 OS=Solanum lycopersicum OX=4081 GN=ERF.C.3 PE=2 SV=1;	PF00847.22	AP2	AP2 domain
TraesCS5D02G314400	AP2	0.89	0.116667	-2.93141	down	-	GO:0006355;GO:0005634;GO:0003700;GO:000367	BP:regulation of transcription, DNA-templated;CC:nucleus;MF:transcription factor activity, sequence-specific DNA binding;MF:DNA binding;	------	------	------	------	ENOG410ZM5Q	K:Transcription	KAF7073690.1	hypothetical protein CFC21_078638 [Triticum aestivum]	sp|A0A3Q7I5Y9|ERFC3_SOLLC;	Ethylene-response factor C3 OS=Solanum lycopersicum OX=4081 GN=ERF.C.3 PE=2 SV=1;	PF00847.22	AP2	AP2 domain
TraesCS3D02G372900	AP2	1.72667	0.203333	-3.08607	down	-	GO:0006355;GO:0006351;GO:0005634;GO:0003700;GO:000367	BP:regulation of transcription, DNA-templated;BP:transcription, DNA-templated;CC:nucleus;MF:transcription factor activity, sequence-specific DNA binding;MF:DNA binding;	------	------	------	------	ENOG410YYVP	K:Transcription	XP_020149577.1	ethylene-responsive transcription factor ABR1 [Aegilops tauschii subsp. strangulata]	sp|Q70II3|EF110_ARATH;	Ethylene-responsive transcription factor ERF110 OS=Arabidopsis thaliana OX=3702 GN=ERF110 PE=2 SV=2;	PF00847.22	AP2	AP2 domain
TraesCS7D02G463000	AP2	3.60333	0.696667	-2.37079	down	Auxin response factor [Source:UniProtKB/TrEMBL;Acc:A0A1D6CQU2]	GO:0009734;GO:0009725;GO:0006355;GO:0006351;GO:0005634;GO:000367	BP:auxin-activated signaling pathway;BP:response to hormone;BP:regulation of transcription, DNA-templated;BP:transcription, DNA-templated;CC:nucleus;MF:DNA binding;	------	------	------	------	ENOG41108GW	K:Transcription	XP_020191290.1	auxin response factor 13 [Aegilops tauschii subsp. strangulata]	sp|Q7XSS9|ARFM_ORYSJ;	Auxin response factor 13 OS=Oryza sativa subsp. japonica OX=39947 GN=ARF13 PE=2 SV=2;	PF06507.15;PF02362.23	Auxin_resp;B3	Auxin response factor;B3 DNA binding domain
TraesCS2A02G547800	AP2	9.04	4.09667	-1.14187	down	Auxin response factor [Source:UniProtKB/TrEMBL;Acc:A0A1D5T972]	GO:0009734;GO:0009725;GO:0006355;GO:0006351;GO:0005634;GO:0005515;GO:000367	BP:auxin-activated signaling pathway;BP:response to hormone;BP:regulation of transcription, DNA-templated;BP:transcription, DNA-templated;CC:nucleus;MF:protein binding;MF:DNA binding;	------	------	------	------	ENOG410YA3R	K:Transcription	XP_037479919.1	auxin response factor 12-like [Triticum dicoccoides]	sp|Q258Y5|ARFL_ORYSI;	Auxin response factor 12 OS=Oryza sativa subsp. indica OX=39946 GN=ARF12 PE=3 SV=1;	PF06507.15;PF02362.23;PF02309.18	Auxin_resp;B3;AUX_IAA	Auxin response factor;B3 DNA binding domain;AUX/IAA family
TraesCS7B02G085000	B3	1.98333	4.78	1.26908	up	-	GO:0006355;GO:0006351;GO:0005634;GO:000367	BP:regulation of transcription, DNA-templated;BP:transcription, DNA-templated;CC:nucleus;MF:DNA binding;	------	------	------	------	ENOG4111SA1	K:Transcription	KAF7100297.1	hypothetical protein CFC21_101829 [Triticum aestivum]	sp|Q69V36|Y6944_ORYSJ;	B3 domain-containing protein Os06g0194400 OS=Oryza sativa subsp. japonica OX=39947 GN=Os06g0194400 PE=2 SV=1;	PF02362.23	B3	B3 DNA binding domain
TraesCS6D02G102000	B3	5.98333	2.75667	-1.11802	down	-	GO:0005634;GO:000367	CC:nucleus;MF:DNA binding;	------	------	------	------	ENOG410ZNRS	S:Function unknown	KAF7088648.1	hypothetical protein CFC21_091733 [Triticum aestivum]	sp|Q2QMT6|Y1208_ORYSJ;	B3 domain-containing protein LOC_Os12g40080 OS=Oryza sativa subsp. japonica OX=39947 GN=Os12g0591400 PE=3 SV=1;	PF02362.23	B3	B3 DNA binding domain
TraesCS1B02G392300	B3	5.76667	2.45667	-1.23104	down	-	GO:0006355;GO:0006351;GO:0005634;GO:0003700;GO:000367	BP:regulation of transcription, DNA-templated;BP:transcription, DNA-templated;CC:nucleus;MF:transcription factor activity, sequence-specific DNA binding;MF:DNA binding;	K09287	RAV	------	------	ENOG4110AU5	K:Transcription	KAF6991570.1	hypothetical protein CFC21_008647 [Triticum aestivum]	sp|Q8RZX9|Y1934_ORYSJ;	AP2/ERF and B3 domain-containing protein Os01g0693400 OS=Oryza sativa subsp. japonica OX=39947 GN=Os01g0693400 PE=2 SV=1;	PF02362.23;PF00847.22	B3;AP2	B3 DNA binding domain;AP2 domain
TraesCS3D02G106600	bHLH	0.09	0.683333	2.92459	up	-	GO:004698	MF:protein dimerization activity;	------	------	------	------	ENOG410ZMUQ	S:Function unknown	XP_020164742.1	putative transcription factor bHLH041 [Aegilops tauschii subsp. strangulata]	sp|Q9LTS4|BH041_ARATH;	Putative transcription factor bHLH041 OS=Arabidopsis thaliana OX=3702 GN=BHLH41 PE=3 SV=1;	PF00010.28	HLH	Helix-loop-helix DNA-binding domain
TraesCS6B02G317600	bHLH	1.53333	3.82	1.3169	up	-	GO:0006351;GO:0003700;GO:004698	BP:transcription, DNA-templated;MF:transcription factor activity, sequence-specific DNA binding;MF:protein dimerization activity;	------	------	------	------	ENOG411216Z	K:Transcription	KAF7085660.1	hypothetical protein CFC21_089062 [Triticum aestivum]	sp|Q9CAA4|BIM2_ARATH;	Transcription factor BIM2 OS=Arabidopsis thaliana OX=3702 GN=BIM2 PE=1 SV=1;	PF00010.28	HLH	Helix-loop-helix DNA-binding domain
TraesCS4D02G018700	bHLH	2.24667	5.23667	1.22086	up	-	GO:004698	MF:protein dimerization activity;	------	------	------	------	ENOG41107E5	S:Function unknown	KAF7016477.1	hypothetical protein CFC21_030082 [Triticum aestivum]	sp|Q9T072|BH025_ARATH;	Transcription factor bHLH25 OS=Arabidopsis thaliana OX=3702 GN=BHLH25 PE=2 SV=2;	PF00010.28	HLH	Helix-loop-helix DNA-binding domain
TraesCS5D02G428400	bHLH	1.80667	0.76	-1.24926	down	Phytochrome-interacting factor-like bHLH protein, Stress-responsive transcription factor, Regulator of reduced internode elongation under drought condition [Source: Projected from Oryza sativa (Os03g0782500)]	GO:0080006;GO:0045893;GO:0090229;GO:0005634;GO:004698	BP:internode patterning;BP:positive regulation of transcription, DNA-templated;BP:negative regulation of red or far-red light signaling pathway;CC:nucleus;MF:protein dimerization activity;	K16189	PIF4	map04075	Plant hormone signal transduction	ENOG410YAGK	K:Transcription	KAF7075017.1	hypothetical protein CFC21_079821 [Triticum aestivum]	sp|Q10CH5|PIL13_ORYSJ;	Transcription factor PHYTOCHROME INTERACTING FACTOR-LIKE 13 OS=Oryza sativa subsp. japonica OX=39947 GN=PIL13 PE=1 SV=1;	PF00010.28	HLH	Helix-loop-helix DNA-binding domain
TraesCS3A02G102900	bHLH	3.20667	1.00333	-1.67627	down	-	GO:004698	MF:protein dimerization activity;	------	------	------	------	ENOG410ZM5C	K:Transcription	EMS47100.1	Transcription factor bHLH51 [Triticum urartu]	sp|Q9XEF0|BH051_ARATH;	Transcription factor bHLH51 OS=Arabidopsis thaliana OX=3702 GN=BHLH51 PE=2 SV=1;	PF00010.28	HLH	Helix-loop-helix DNA-binding domain
TraesCS6D02G253000	bHLH	2.35	0.57	-2.04363	down	-	GO:0006355;GO:0005634;GO:004698	BP:regulation of transcription, DNA-templated;CC:nucleus;MF:protein dimerization activity;	------	------	------	------	ENOG410YGAM	K:Transcription	XP_020200434.1	transcription factor bHLH137 [Aegilops tauschii subsp. strangulata]	sp|Q8GY61|BH063_ARATH;	Transcription factor bHLH63 OS=Arabidopsis thaliana OX=3702 GN=BHLH63 PE=1 SV=1;	PF00010.28	HLH	Helix-loop-helix DNA-binding domain
TraesCS5B02G054800	bHLH	7.25333	1.63333	-2.15083	down	-	GO:0005634;GO:004698	CC:nucleus;MF:protein dimerization activity;	K16189	PIF4	map04075	Plant hormone signal transduction	ENOG410YAGK	K:Transcription	KAF7063502.1	hypothetical protein CFC21_070016 [Triticum aestivum]	sp|Q10CH5|PIL13_ORYSJ;	Transcription factor PHYTOCHROME INTERACTING FACTOR-LIKE 13 OS=Oryza sativa subsp. japonica OX=39947 GN=PIL13 PE=1 SV=1;	PF00010.28	HLH	Helix-loop-helix DNA-binding domain
TraesCS5D02G060300	bHLH	4.02	0.84	-2.25873	down	-	GO:0005634;GO:004698	CC:nucleus;MF:protein dimerization activity;	K16189	PIF4	map04075	Plant hormone signal transduction	ENOG410YAGK	K:Transcription	XP_020189473.1	transcription factor PHYTOCHROME INTERACTING FACTOR-LIKE 13 [Aegilops tauschii subsp. strangulata]	sp|Q10CH5|PIL13_ORYSJ;	Transcription factor PHYTOCHROME INTERACTING FACTOR-LIKE 13 OS=Oryza sativa subsp. japonica OX=39947 GN=PIL13 PE=1 SV=1;	PF00010.28	HLH	Helix-loop-helix DNA-binding domain
TraesCS6A02G273000	bHLH	3.74667	0.63	-2.57218	down	-	GO:0006355;GO:0005634;GO:004698	BP:regulation of transcription, DNA-templated;CC:nucleus;MF:protein dimerization activity;	------	------	------	------	ENOG410YGAM	K:Transcription	KAF7079967.1	hypothetical protein CFC21_084125 [Triticum aestivum]	sp|Q8GY61|BH063_ARATH;	Transcription factor bHLH63 OS=Arabidopsis thaliana OX=3702 GN=BHLH63 PE=1 SV=1;	PF00010.28	HLH	Helix-loop-helix DNA-binding domain
TraesCS5A02G049600	bHLH	3.89667	0.636667	-2.61363	down	-	GO:0005634;GO:004698	CC:nucleus;MF:protein dimerization activity;	K16189	PIF4	map04075	Plant hormone signal transduction	ENOG410YAGK	K:Transcription	KAF7056859.1	hypothetical protein CFC21_064232 [Triticum aestivum]	sp|Q10CH5|PIL13_ORYSJ;	Transcription factor PHYTOCHROME INTERACTING FACTOR-LIKE 13 OS=Oryza sativa subsp. japonica OX=39947 GN=PIL13 PE=1 SV=1;	PF00010.28	HLH	Helix-loop-helix DNA-binding domain
TraesCS7A02G542700	bZIP	18.6367	8.82333	-1.07875	down	-	GO:0006355;GO:0009738;GO:0045893;GO:0005634;GO:000370	BP:regulation of transcription, DNA-templated;BP:abscisic acid-activated signaling pathway;BP:positive regulation of transcription, DNA-templated;CC:nucleus;MF:transcription factor activity, sequence-specific DNA binding;	------	------	------	------	ENOG41105YM	K:Transcription	XP_037463082.1	protein FD-like [Triticum dicoccoides]	sp|Q84JK2|FD_ARATH;	Protein FD OS=Arabidopsis thaliana OX=3702 GN=FD PE=1 SV=1;	PF00170.23;PF07716.17	bZIP_1;bZIP_2	bZIP transcription factor;Basic region leucine zipper
TraesCS7D02G527500	bZIP	55.0967	25.9233	-1.08771	down	-	GO:0006355;GO:0009738;GO:0045893;GO:0005634;GO:000370	BP:regulation of transcription, DNA-templated;BP:abscisic acid-activated signaling pathway;BP:positive regulation of transcription, DNA-templated;CC:nucleus;MF:transcription factor activity, sequence-specific DNA binding;	------	------	------	------	ENOG41105YM	K:Transcription	XP_020177215.1	protein FD [Aegilops tauschii subsp. strangulata]	sp|Q84JK2|FD_ARATH;	Protein FD OS=Arabidopsis thaliana OX=3702 GN=FD PE=1 SV=1;	PF00170.23;PF07716.17	bZIP_1;bZIP_2	bZIP transcription factor;Basic region leucine zipper
TraesCS7B02G464700	bZIP	21.9967	9.61333	-1.19418	down	-	GO:0006355;GO:0009738;GO:0045893;GO:0005634;GO:000370	BP:regulation of transcription, DNA-templated;BP:abscisic acid-activated signaling pathway;BP:positive regulation of transcription, DNA-templated;CC:nucleus;MF:transcription factor activity, sequence-specific DNA binding;	------	------	------	------	ENOG41105YM	K:Transcription	XP_037463319.1	bZIP transcription factor 27-like [Triticum dicoccoides]	sp|Q84JK2|FD_ARATH;	Protein FD OS=Arabidopsis thaliana OX=3702 GN=FD PE=1 SV=1;	PF00170.23;PF07716.17	bZIP_1;bZIP_2	bZIP transcription factor;Basic region leucine zipper
TraesCS6A02G288900	bZIP	2.8	0.913333	-1.61621	down	-	GO:0006355;GO:000370	BP:regulation of transcription, DNA-templated;MF:transcription factor activity, sequence-specific DNA binding;	------	------	------	------	ENOG410YWTI	K:Transcription	XP_037449923.1	bZIP transcription factor 2-like [Triticum dicoccoides]	------	------	PF00170.23;PF07716.17	bZIP_1;bZIP_2	bZIP transcription factor;Basic region leucine zipper
TraesCS6A02G175800	bZIP	1.21	0.236667	-2.35408	down	-	GO:0010099;GO:0010218;GO:0006355;GO:0045944;GO:0010017;GO:0010114;GO:0005634;GO:0003700;GO:0003677;GO:000098	BP:regulation of photomorphogenesis;BP:response to far red light;BP:regulation of transcription, DNA-templated;BP:positive regulation of transcription from RNA polymerase II promoter;BP:red or far-red light signaling pathway;BP:response to red light;CC:nucleus;MF:transcription factor activity, sequence-specific DNA binding;MF:DNA binding;MF:RNA polymerase II transcription factor activity, sequenc…	K16241	HY5	map04712	Circadian rhythm - plant	ENOG4111CH5	K:Transcription	XP_020194215.1	transcription factor HY5 [Aegilops tauschii subsp. strangulata]	sp|O24646|HY5_ARATH;	Transcription factor HY5 OS=Arabidopsis thaliana OX=3702 GN=HY5 PE=1 SV=1;	PF00170.23;PF07716.17	bZIP_1;bZIP_2	bZIP transcription factor;Basic region leucine zipper
TraesCS6B02G209600	bZIP	3.54	0.6	-2.56071	down	Basic-leucine zipper (bZIP) transcription factor family protein [Source:Projected from Arabidopsis thaliana (AT5G11260) TAIR;Acc:AT5G11260]	GO:0010099;GO:0010218;GO:0006355;GO:0045944;GO:0010017;GO:0010114;GO:0005634;GO:0003700;GO:0003677;GO:000098	BP:regulation of photomorphogenesis;BP:response to far red light;BP:regulation of transcription, DNA-templated;BP:positive regulation of transcription from RNA polymerase II promoter;BP:red or far-red light signaling pathway;BP:response to red light;CC:nucleus;MF:transcription factor activity, sequence-specific DNA binding;MF:DNA binding;MF:RNA polymerase II transcription factor activity, sequenc…	K16241	HY5	map04712	Circadian rhythm - plant	ENOG4111CH5	K:Transcription	XP_020194215.1	transcription factor HY5 [Aegilops tauschii subsp. strangulata]	sp|O24646|HY5_ARATH;	Transcription factor HY5 OS=Arabidopsis thaliana OX=3702 GN=HY5 PE=1 SV=1;	PF00170.23;PF07716.17	bZIP_1;bZIP_2	bZIP transcription factor;Basic region leucine zipper
TraesCS5A02G405200	bZIP	2.17333	0.316667	-2.77887	down	-	GO:0006355;GO:0045893;GO:0005634;GO:0003700;GO:000097	BP:regulation of transcription, DNA-templated;BP:positive regulation of transcription, DNA-templated;CC:nucleus;MF:transcription factor activity, sequence-specific DNA binding;MF:transcription regulatory region sequence-specific DNA binding;	------	------	------	------	ENOG4110761	S:Function unknown	XP_037431475.1	ocs element-binding factor 1-like [Triticum dicoccoides]	------	------	PF00170.23;PF07716.17	bZIP_1;bZIP_2	bZIP transcription factor;Basic region leucine zipper
TraesCS2D02G467100	bZIP	0.976667	0.113333	-3.1073	down	-	GO:0006355;GO:0009738;GO:0045893;GO:0005634;GO:000370	BP:regulation of transcription, DNA-templated;BP:abscisic acid-activated signaling pathway;BP:positive regulation of transcription, DNA-templated;CC:nucleus;MF:transcription factor activity, sequence-specific DNA binding;	------	------	------	------	ENOG41103PU;ENOG41105YM	S:Function unknown;K:Transcription	XP_020174160.1	bZIP transcription factor 27 [Aegilops tauschii subsp. strangulata]	------	------	PF00170.23;PF07716.17	bZIP_1;bZIP_2	bZIP transcription factor;Basic region leucine zipper
TraesCS3D02G293500	bZIP	4.28333	9.16333	1.09714	up	-	GO:0006355;GO:0045893;GO:0005634;GO:0003700;GO:000367	BP:regulation of transcription, DNA-templated;BP:positive regulation of transcription, DNA-templated;CC:nucleus;MF:transcription factor activity, sequence-specific DNA binding;MF:DNA binding;	------	------	------	------	ENOG410YEVN	K:Transcription	XP_020195077.1	basic leucine zipper 6 [Aegilops tauschii subsp. strangulata]	sp|Q5JMK6|BZP06_ORYSJ;	Basic leucine zipper 6 OS=Oryza sativa subsp. japonica OX=39947 GN=BZIP06 PE=2 SV=1;	PF00170.23;PF07716.17;PF03131.19	bZIP_1;bZIP_2;bZIP_Maf	bZIP transcription factor;Basic region leucine zipper;bZIP Maf transcription factor
TraesCS6B02G318700	bZIP	2.13333	0.443333	-2.26665	down	-	GO:0006355;GO:000370	BP:regulation of transcription, DNA-templated;MF:transcription factor activity, sequence-specific DNA binding;	------	------	------	------	ENOG410YWTI	K:Transcription	KAF7085670.1	hypothetical protein CFC21_089072 [Triticum aestivum]	------	------	PF00170.23;PF07716.17;PF08537.12	bZIP_1;bZIP_2;NBP1	bZIP transcription factor;Basic region leucine zipper;Fungal Nap binding protein NBP1
TraesCS5A02G057500	bZIP	21.2567	8.83333	-1.26689	down	-	GO:0006355;GO:0005634;GO:000370	BP:regulation of transcription, DNA-templated;CC:nucleus;MF:transcription factor activity, sequence-specific DNA binding;	------	------	------	------	ENOG410YRZY	S:Function unknown	KAF7056953.1	hypothetical protein CFC21_064315 [Triticum aestivum]	sp|Q99090|CPRF2_PETCR;	Light-inducible protein CPRF2 OS=Petroselinum crispum OX=4043 GN=CPRF2 PE=2 SV=2;	PF12498.10;PF00170.23;PF07716.17	bZIP_C;bZIP_1;bZIP_2	Basic leucine-zipper C terminal;bZIP transcription factor;Basic region leucine zipper
TraesCS5D02G068800	bZIP	47.55	11.0733	-2.10236	down	-	GO:0006355;GO:0005634;GO:000370	BP:regulation of transcription, DNA-templated;CC:nucleus;MF:transcription factor activity, sequence-specific DNA binding;	------	------	------	------	ENOG410YRZY	S:Function unknown	KAF7070568.1	hypothetical protein CFC21_076076 [Triticum aestivum]	sp|Q99090|CPRF2_PETCR;	Light-inducible protein CPRF2 OS=Petroselinum crispum OX=4043 GN=CPRF2 PE=2 SV=2;	PF12498.10;PF00170.23;PF07716.17	bZIP_C;bZIP_1;bZIP_2	Basic leucine-zipper C terminal;bZIP transcription factor;Basic region leucine zipper
TraesCS5B02G059200	bZIP	55.91	11.9367	-2.22771	down	-	GO:0006355;GO:0005634;GO:000370	BP:regulation of transcription, DNA-templated;CC:nucleus;MF:transcription factor activity, sequence-specific DNA binding;	------	------	------	------	ENOG410YRZY	S:Function unknown	XP_037439421.1	light-inducible protein CPRF2-like [Triticum dicoccoides]	sp|Q99090|CPRF2_PETCR;	Light-inducible protein CPRF2 OS=Petroselinum crispum OX=4043 GN=CPRF2 PE=2 SV=2;	PF12498.10;PF00170.23;PF07716.17	bZIP_C;bZIP_1;bZIP_2	Basic leucine-zipper C terminal;bZIP transcription factor;Basic region leucine zipper
TraesCS1A02G276600	bZIP	6.04333	2.95	-1.03463	down	-	GO:0006355;GO:0006351;GO:0003700;GO:004356	BP:regulation of transcription, DNA-templated;BP:transcription, DNA-templated;MF:transcription factor activity, sequence-specific DNA binding;MF:sequence-specific DNA binding;	K14431	TGA	map04075	Plant hormone signal transduction	ENOG410YEKH	K:Transcription	KAF6984928.1	hypothetical protein CFC21_002870 [Triticum aestivum]	sp|Q6F2N0|TGAL5_ORYSJ;	Transcription factor TGAL5 OS=Oryza sativa subsp. japonica OX=39947 GN=TGAL5 PE=1 SV=1;	PF14144.8;PF00170.23;PF07716.17	DOG1;bZIP_1;bZIP_2	Seed dormancy control;bZIP transcription factor;Basic region leucine zipper
TraesCS3B02G261800	C3H	0.466667	1.35667	1.5396	up	-	GO:0046872;GO:000367	MF:metal ion binding;MF:DNA binding;	------	------	------	------	COG5063	S:Function unknown	KAF7029940.1	hypothetical protein CFC21_041575 [Triticum aestivum]	sp|A2ZVY5|C3H9_ORYSJ;	Zinc finger CCCH domain-containing protein 9 OS=Oryza sativa subsp. japonica OX=39947 GN=Os01g0645000 PE=2 SV=1;	PF00642.26;PF18044.3	zf-CCCH;zf-CCCH_4	Zinc finger C-x8-C-x5-C-x3-H type;CCCH-type zinc finger
TraesCS3B02G125600	C3H	20.9	9.73333	-1.1025	down	-	GO:0010150;GO:0009867;GO:0005634;GO:0046872;GO:000367	BP:leaf senescence;BP:jasmonic acid mediated signaling pathway;CC:nucleus;MF:metal ion binding;MF:DNA binding;	------	------	------	------	ENOG410XR0Z	S:Function unknown	KAF7028229.1	hypothetical protein CFC21_040187 [Triticum aestivum]	sp|Q9FU27|C3H2_ORYSJ;	Zinc finger CCCH domain-containing protein 2 OS=Oryza sativa subsp. japonica OX=39947 GN=Os01g0192000 PE=2 SV=1;	PF00642.26;PF18044.3;PF18345.3	zf-CCCH;zf-CCCH_4;zf_CCCH_4	Zinc finger C-x8-C-x5-C-x3-H type;CCCH-type zinc finger;Zinc finger domain
TraesCS3D02G109300	C3H	103.903	39.87	-1.38187	down	-	GO:0010150;GO:0009867;GO:0005634;GO:0046872;GO:000367	BP:leaf senescence;BP:jasmonic acid mediated signaling pathway;CC:nucleus;MF:metal ion binding;MF:DNA binding;	------	------	------	------	ENOG410XR0Z	S:Function unknown	XP_020192020.1	zinc finger CCCH domain-containing protein 2 [Aegilops tauschii subsp. strangulata]	sp|Q9FU27|C3H2_ORYSJ;	Zinc finger CCCH domain-containing protein 2 OS=Oryza sativa subsp. japonica OX=39947 GN=Os01g0192000 PE=2 SV=1;	PF00642.26;PF18044.3;PF18345.3	zf-CCCH;zf-CCCH_4;zf_CCCH_4	Zinc finger C-x8-C-x5-C-x3-H type;CCCH-type zinc finger;Zinc finger domain
TraesCS3A02G107200	C3H	44.8933	11.64	-1.94741	down	TZF1 [Source:UniProtKB/TrEMBL;Acc:A0A0G3YJW9]	GO:0010150;GO:0009867;GO:0005634;GO:0046872;GO:000367	BP:leaf senescence;BP:jasmonic acid mediated signaling pathway;CC:nucleus;MF:metal ion binding;MF:DNA binding;	------	------	------	------	ENOG410XR0Z	S:Function unknown	XP_037404463.1	zinc finger CCCH domain-containing protein 2-like [Triticum dicoccoides]	sp|Q9FU27|C3H2_ORYSJ;	Zinc finger CCCH domain-containing protein 2 OS=Oryza sativa subsp. japonica OX=39947 GN=Os01g0192000 PE=2 SV=1;	PF00642.26;PF18044.3;PF18345.3	zf-CCCH;zf-CCCH_4;zf_CCCH_4	Zinc finger C-x8-C-x5-C-x3-H type;CCCH-type zinc finger;Zinc finger domain
TraesCS3D02G220700	C3H	0.166667	0.796667	2.25701	up	-	GO:0046872;GO:000367	MF:metal ion binding;MF:DNA binding;	------	------	------	------	COG5063	S:Function unknown	XP_020154780.1	zinc finger CCCH domain-containing protein 9 isoform X1 [Aegilops tauschii subsp. strangulata]	sp|A2ZVY5|C3H9_ORYSJ;	Zinc finger CCCH domain-containing protein 9 OS=Oryza sativa subsp. japonica OX=39947 GN=Os01g0645000 PE=2 SV=1;	PF00642.26;PF18044.3;PF18345.3;PF14608.8	zf-CCCH;zf-CCCH_4;zf_CCCH_4;zf-CCCH_2	Zinc finger C-x8-C-x5-C-x3-H type;CCCH-type zinc finger;Zinc finger domain;RNA-binding, Nab2-type zinc finger
TraesCS3A02G232500	C3H	0.26	1.16667	2.16581	up	-	GO:004687	MF:metal ion binding;	------	------	------	------	COG5063	S:Function unknown	KAF7022958.1	hypothetical protein CFC21_035584 [Triticum aestivum]	sp|A2ZVY5|C3H9_ORYSJ;	Zinc finger CCCH domain-containing protein 9 OS=Oryza sativa subsp. japonica OX=39947 GN=Os01g0645000 PE=2 SV=1;	PF00642.26;PF18044.3;PF18345.3;PF14608.8	zf-CCCH;zf-CCCH_4;zf_CCCH_4;zf-CCCH_2	Zinc finger C-x8-C-x5-C-x3-H type;CCCH-type zinc finger;Zinc finger domain;RNA-binding, Nab2-type zinc finger
TraesCS7A02G218600	CO-like	1.23	5.65333	2.20044	up	-	GO:0005634;GO:0008270;GO:000551	CC:nucleus;MF:zinc ion binding;MF:protein binding;	------	------	------	------	ENOG410YA5C	S:Function unknown	XP_037460315.1	zinc finger protein CONSTANS-LIKE 9-like isoform X1 [Triticum dicoccoides]	sp|Q9SSE5|COL9_ARATH;	Zinc finger protein CONSTANS-LIKE 9 OS=Arabidopsis thaliana OX=3702 GN=COL9 PE=1 SV=1;	PF06203.16;PF00643.26	CCT;zf-B_box	CCT motif;B-box zinc finger
TraesCS7D02G220300	CO-like	1.54667	6.01667	1.9598	up	-	GO:0005634;GO:0008270;GO:000551	CC:nucleus;MF:zinc ion binding;MF:protein binding;	------	------	------	------	ENOG410YA5C	S:Function unknown	XP_020150634.1	zinc finger protein CONSTANS-LIKE 9 isoform X1 [Aegilops tauschii subsp. strangulata]	sp|Q9SSE5|COL9_ARATH;	Zinc finger protein CONSTANS-LIKE 9 OS=Arabidopsis thaliana OX=3702 GN=COL9 PE=1 SV=1;	PF06203.16;PF00643.26	CCT;zf-B_box	CCT motif;B-box zinc finger
TraesCS6D02G140900	CO-like	8.68333	3.52	-1.30267	down	-	GO:0005634;GO:0008270;GO:000551	CC:nucleus;MF:zinc ion binding;MF:protein binding;	------	------	------	------	COG5641	K:Transcription	XP_020163882.1	zinc finger protein HD1 isoform X1 [Aegilops tauschii subsp. strangulata]	sp|O82117|CO3_ORYSJ;	Zinc finger protein CO3 OS=Oryza sativa subsp. japonica OX=39947 GN=CO3 PE=2 SV=1;	PF06203.16;PF00643.26	CCT;zf-B_box	CCT motif;B-box zinc finger
TraesCS7B02G125500	DBB	0.693333	3.89333	2.48939	up	-	GO:0005634;GO:0005622;GO:000827	CC:nucleus;CC:intracellular;MF:zinc ion binding;	------	------	------	------	ENOG410YA5C	S:Function unknown	XP_037465784.1	zinc finger protein CONSTANS-LIKE 9-like isoform X1 [Triticum dicoccoides]	sp|Q9SSE5|COL9_ARATH;	Zinc finger protein CONSTANS-LIKE 9 OS=Arabidopsis thaliana OX=3702 GN=COL9 PE=1 SV=1;	PF00643.26	zf-B_box	B-box zinc finger
TraesCS6A02G216400	DBB	4.23	1.05	-2.01027	down	-	GO:0006355;GO:0009640;GO:0005634;GO:000827	BP:regulation of transcription, DNA-templated;BP:photomorphogenesis;CC:nucleus;MF:zinc ion binding;	------	------	------	------	ENOG410YBMW	S:Function unknown	XP_037447336.1	B-box zinc finger protein 25-like [Triticum dicoccoides]	sp|Q9SID1|BBX25_ARATH;	B-box zinc finger protein 25 OS=Arabidopsis thaliana OX=3702 GN=BBX25 PE=1 SV=2;	PF00643.26	zf-B_box	B-box zinc finger
TraesCS6D02G199200	DBB	12.8367	2.75333	-2.22102	down	-	GO:0006355;GO:0009640;GO:0005634;GO:0005622;GO:000827	BP:regulation of transcription, DNA-templated;BP:photomorphogenesis;CC:nucleus;CC:intracellular;MF:zinc ion binding;	------	------	------	------	ENOG410YBMW	S:Function unknown	XP_020173021.1	B-box zinc finger protein 25 [Aegilops tauschii subsp. strangulata]	sp|Q9SID1|BBX25_ARATH;	B-box zinc finger protein 25 OS=Arabidopsis thaliana OX=3702 GN=BBX25 PE=1 SV=2;	PF00643.26	zf-B_box	B-box zinc finger
TraesCS6B02G246500	DBB	8.16	1.41	-2.53287	down	-	GO:0006355;GO:0009640;GO:0005634;GO:0005622;GO:000827	BP:regulation of transcription, DNA-templated;BP:photomorphogenesis;CC:nucleus;CC:intracellular;MF:zinc ion binding;	------	------	------	------	ENOG410YBMW	S:Function unknown	XP_037454224.1	B-box zinc finger protein 25-like [Triticum dicoccoides]	sp|Q9SID1|BBX25_ARATH;	B-box zinc finger protein 25 OS=Arabidopsis thaliana OX=3702 GN=BBX25 PE=1 SV=2;	PF00643.26	zf-B_box	B-box zinc finger
TraesCS7A02G383400	DBB	5.35333	14.0533	1.3924	up	-	GO:0006355;GO:0009640;GO:0005634;GO:000827	BP:regulation of transcription, DNA-templated;BP:photomorphogenesis;CC:nucleus;MF:zinc ion binding;	------	------	------	------	ENOG410YIAM	S:Function unknown	KAF7097023.1	hypothetical protein CFC21_098890 [Triticum aestivum]	sp|Q0IGM7|BBX20_ARATH;	B-box zinc finger protein 20 OS=Arabidopsis thaliana OX=3702 GN=BBX20 PE=1 SV=1;	PF00643.26;PF16366.7	zf-B_box;CEBP_ZZ	B-box zinc finger;Cytoplasmic polyadenylation element-binding protein ZZ domain
TraesCS7D02G379900	DBB	5.62	14.4833	1.36575	up	-	GO:0006355;GO:0009640;GO:0005634;GO:0005622;GO:000827	BP:regulation of transcription, DNA-templated;BP:photomorphogenesis;CC:nucleus;CC:intracellular;MF:zinc ion binding;	------	------	------	------	ENOG410YIAM	S:Function unknown	XP_020146276.1	B-box zinc finger protein 20 [Aegilops tauschii subsp. strangulata]	sp|Q9LQZ7|BBX21_ARATH;	B-box zinc finger protein 21 OS=Arabidopsis thaliana OX=3702 GN=BBX21 PE=1 SV=1;	PF00643.26;PF16366.7	zf-B_box;CEBP_ZZ	B-box zinc finger;Cytoplasmic polyadenylation element-binding protein ZZ domain
TraesCS5B02G317700	DBB	30.02	12.81	-1.22865	down	-	GO:0006355;GO:0009640;GO:0005634;GO:0005622;GO:000827	BP:regulation of transcription, DNA-templated;BP:photomorphogenesis;CC:nucleus;CC:intracellular;MF:zinc ion binding;	------	------	------	------	ENOG410Y2NN	S:Function unknown	KAF7064386.1	hypothetical protein CFC21_070715 [Triticum aestivum]	sp|C0SVM5|BBX19_ARATH;	B-box zinc finger protein 19 OS=Arabidopsis thaliana OX=3702 GN=BBX19 PE=1 SV=1;	PF00643.26;PF16366.7	zf-B_box;CEBP_ZZ	B-box zinc finger;Cytoplasmic polyadenylation element-binding protein ZZ domain
TraesCS2B02G406600	DBB	18.1633	7.36667	-1.30195	down	-	GO:000827	MF:zinc ion binding;	------	------	------	------	ENOG410YIAM	S:Function unknown	KAF7010223.1	hypothetical protein CFC21_024665 [Triticum aestivum]	sp|Q9LQZ7|BBX21_ARATH;	B-box zinc finger protein 21 OS=Arabidopsis thaliana OX=3702 GN=BBX21 PE=1 SV=1;	PF00643.26;PF16366.7	zf-B_box;CEBP_ZZ	B-box zinc finger;Cytoplasmic polyadenylation element-binding protein ZZ domain
TraesCS5D02G323400	DBB	29.8067	11.8	-1.33685	down	-	GO:0006355;GO:0009640;GO:0005634;GO:0005622;GO:000827	BP:regulation of transcription, DNA-templated;BP:photomorphogenesis;CC:nucleus;CC:intracellular;MF:zinc ion binding;	------	------	------	------	ENOG410Y2NN	S:Function unknown	XP_020148445.1	B-box zinc finger protein 18 [Aegilops tauschii subsp. strangulata]	sp|C0SVM5|BBX19_ARATH;	B-box zinc finger protein 19 OS=Arabidopsis thaliana OX=3702 GN=BBX19 PE=1 SV=1;	PF00643.26;PF16366.7	zf-B_box;CEBP_ZZ	B-box zinc finger;Cytoplasmic polyadenylation element-binding protein ZZ domain
TraesCS5A02G317100	DBB	54.9333	20.1833	-1.44452	down	-	GO:0006355;GO:0009640;GO:0005634;GO:0005622;GO:000827	BP:regulation of transcription, DNA-templated;BP:photomorphogenesis;CC:nucleus;CC:intracellular;MF:zinc ion binding;	------	------	------	------	ENOG410Y2NN	S:Function unknown	XP_037435506.1	B-box zinc finger protein 18-like [Triticum dicoccoides]	sp|C0SVM5|BBX19_ARATH;	B-box zinc finger protein 19 OS=Arabidopsis thaliana OX=3702 GN=BBX19 PE=1 SV=1;	PF00643.26;PF16366.7	zf-B_box;CEBP_ZZ	B-box zinc finger;Cytoplasmic polyadenylation element-binding protein ZZ domain
TraesCS7B02G120600	Dof	0.063333	0.44	2.79647	up	-	GO:0006355;GO:0005634;GO:000367	BP:regulation of transcription, DNA-templated;CC:nucleus;MF:DNA binding;	------	------	------	------	ENOG410YQE9;ENOG410ZMIT	S:Function unknown;	KAF7100719.1	hypothetical protein CFC21_102197 [Triticum aestivum]	sp|Q6Z345|DOF4_ORYSJ;	Dof zinc finger protein 4 OS=Oryza sativa subsp. japonica OX=39947 GN=DOF4 PE=2 SV=1;	PF02701.17	zf-Dof	Dof domain, zinc finger
TraesCS3A02G180600	Dof	2.07333	0.736667	-1.49287	down	-	GO:0006355;GO:0005634;GO:0003700;GO:000367	BP:regulation of transcription, DNA-templated;CC:nucleus;MF:transcription factor activity, sequence-specific DNA binding;MF:DNA binding;	------	------	------	------	ENOG410YN7N	S:Function unknown	XP_037405270.1	cyclic dof factor 2-like [Triticum dicoccoides]	sp|Q93ZL5|CDF2_ARATH;	Cyclic dof factor 2 OS=Arabidopsis thaliana OX=3702 GN=CDF2 PE=1 SV=2;	PF02701.17	zf-Dof	Dof domain, zinc finger
TraesCS2B02G118000	Dof	12.7933	3.75333	-1.76915	down	-	GO:0006355;GO:0005634;GO:0003700;GO:000367	BP:regulation of transcription, DNA-templated;CC:nucleus;MF:transcription factor activity, sequence-specific DNA binding;MF:DNA binding;	------	------	------	------	ENOG410YN7N	S:Function unknown	XP_037483461.1	cyclic dof factor 1-like [Triticum dicoccoides]	sp|Q93ZL5|CDF2_ARATH;	Cyclic dof factor 2 OS=Arabidopsis thaliana OX=3702 GN=CDF2 PE=1 SV=2;	PF02701.17	zf-Dof	Dof domain, zinc finger
TraesCS2D02G100300	Dof	14	3.92	-1.8365	down	-	GO:0006355;GO:0005634;GO:0003700;GO:000367	BP:regulation of transcription, DNA-templated;CC:nucleus;MF:transcription factor activity, sequence-specific DNA binding;MF:DNA binding;	------	------	------	------	ENOG410YN7N	S:Function unknown	KAF7013982.1	hypothetical protein CFC21_028019 [Triticum aestivum]	sp|Q93ZL5|CDF2_ARATH;	Cyclic dof factor 2 OS=Arabidopsis thaliana OX=3702 GN=CDF2 PE=1 SV=2;	PF02701.17	zf-Dof	Dof domain, zinc finger
TraesCS3D02G185500	Dof	1.73333	0.443333	-1.96709	down	-	GO:0006355;GO:0005634;GO:0003700;GO:000367	BP:regulation of transcription, DNA-templated;CC:nucleus;MF:transcription factor activity, sequence-specific DNA binding;MF:DNA binding;	------	------	------	------	ENOG410YN7N	S:Function unknown	XP_020189771.1	cyclic dof factor 2 [Aegilops tauschii subsp. strangulata]	sp|Q93ZL5|CDF2_ARATH;	Cyclic dof factor 2 OS=Arabidopsis thaliana OX=3702 GN=CDF2 PE=1 SV=2;	PF02701.17	zf-Dof	Dof domain, zinc finger
TraesCS2A02G100800	Dof	11.9067	2.70333	-2.13896	down	-	GO:0006355;GO:0005634;GO:0003700;GO:000367	BP:regulation of transcription, DNA-templated;CC:nucleus;MF:transcription factor activity, sequence-specific DNA binding;MF:DNA binding;	------	------	------	------	ENOG410YN7N	S:Function unknown	XP_020181996.1	cyclic dof factor 1 isoform X1 [Aegilops tauschii subsp. strangulata]	sp|Q93ZL5|CDF2_ARATH;	Cyclic dof factor 2 OS=Arabidopsis thaliana OX=3702 GN=CDF2 PE=1 SV=2;	PF02701.17	zf-Dof	Dof domain, zinc finger
TraesCS3B02G210300	Dof	2.76	0.54	-2.35364	down	-	GO:0006355;GO:0005634;GO:0003700;GO:000367	BP:regulation of transcription, DNA-templated;CC:nucleus;MF:transcription factor activity, sequence-specific DNA binding;MF:DNA binding;	------	------	------	------	ENOG410YN7N	S:Function unknown	KAF7029217.1	hypothetical protein CFC21_041022 [Triticum aestivum]	sp|Q93ZL5|CDF2_ARATH;	Cyclic dof factor 2 OS=Arabidopsis thaliana OX=3702 GN=CDF2 PE=1 SV=2;	PF02701.17	zf-Dof	Dof domain, zinc finger
TraesCS6D02G291000	E2F/DP	0.76	1.86667	1.29639	up	-	GO:0006355;GO:0006357;GO:0007049;GO:0005634;GO:0005667;GO:0003700;GO:0003677;GO:000097	BP:regulation of transcription, DNA-templated;BP:regulation of transcription from RNA polymerase II promoter;BP:cell cycle;CC:nucleus;CC:transcription factor complex;MF:transcription factor activity, sequence-specific DNA binding;MF:DNA binding;MF:RNA polymerase II core promoter proximal region sequence-specific DNA binding;	------	------	------	------	ENOG4111IGY	K:Transcription	XP_020187635.1	E2F transcription factor-like E2FE isoform X1 [Aegilops tauschii subsp. strangulata]	sp|Q8LSZ4|E2FE_ARATH;	E2F transcription factor-like E2FE OS=Arabidopsis thaliana OX=3702 GN=E2FE PE=1 SV=1;	PF02319.22	E2F_TDP	E2F/DP family winged-helix DNA-binding domain
TraesCS3B02G428000	EIL	3.53333	1.08667	-1.70112	down	-	GO:0006355;GO:0009873;GO:0005634;GO:000370	BP:regulation of transcription, DNA-templated;BP:ethylene-activated signaling pathway;CC:nucleus;MF:transcription factor activity, sequence-specific DNA binding;	K14514	EIN3	map04016;map04075	MAPK signaling pathway - plant;Plant hormone signal transduction	ENOG41107DU	S:Function unknown	XP_037418157.1	ETHYLENE INSENSITIVE 3-like 5 protein [Triticum dicoccoides]	sp|Q9FJQ5|EIL5_ARATH;	ETHYLENE INSENSITIVE 3-like 5 protein OS=Arabidopsis thaliana OX=3702 GN=EIL5 PE=2 SV=1;	PF04873.15;PF11001.10	EIN3;DUF2841	Ethylene insensitive 3;Protein of unknown function
TraesCS3D02G390000	EIL	2.83333	0.453333	-2.64386	down	-	GO:0009873;GO:0005634;GO:0003700;GO:000367	BP:ethylene-activated signaling pathway;CC:nucleus;MF:transcription factor activity, sequence-specific DNA binding;MF:DNA binding;	K14514	EIN3	map04016;map04075	MAPK signaling pathway - plant;Plant hormone signal transduction	ENOG41107DU	S:Function unknown	XP_020197833.1	ETHYLENE INSENSITIVE 3-like 5 protein [Aegilops tauschii subsp. strangulata]	sp|Q9FJQ5|EIL5_ARATH;	ETHYLENE INSENSITIVE 3-like 5 protein OS=Arabidopsis thaliana OX=3702 GN=EIL5 PE=2 SV=1;	PF04873.15;PF11001.10	EIN3;DUF2841	Ethylene insensitive 3;Protein of unknown function
TraesCS1A02G293400	FAR1	2.21	0.88	-1.32847	down	-	------	------	------	------	------	------	ENOG41107AZ	S:Function unknown	KAF6985125.1	hypothetical protein CFC21_003021 [Triticum aestivum]	------	------	------	------	------
TraesCS7D02G359900	GATA	1.18333	0.23	-2.36315	down	-	GO:0006355;GO:0003700;GO:0008270;GO:004356	BP:regulation of transcription, DNA-templated;MF:transcription factor activity, sequence-specific DNA binding;MF:zinc ion binding;MF:sequence-specific DNA binding;	------	------	------	------	COG5641	K:Transcription	KAF7109892.1	hypothetical protein CFC21_110079 [Triticum aestivum]	sp|Q6YW48|CGA1_ORYSJ;	Protein CYTOKININ-RESPONSIVE GATA TRANSCRIPTION FACTOR 1 OS=Oryza sativa subsp. japonica OX=39947 GN=CGA1 PE=2 SV=1;	PF00320.29	GATA	GATA zinc finger
TraesCS5A02G514700	HB-other	0.02	0.396667	4.30986	up	-	GO:0006355;GO:0006357;GO:0005634;GO:0003677;GO:0000978;GO:000098	BP:regulation of transcription, DNA-templated;BP:regulation of transcription from RNA polymerase II promoter;CC:nucleus;MF:DNA binding;MF:RNA polymerase II core promoter proximal region sequence-specific DNA binding;MF:RNA polymerase II transcription factor activity, sequence-specific DNA binding;	------	------	------	------	ENOG410XPMQ	K:Transcription	KAF7062355.1	hypothetical protein CFC21_068964 [Triticum aestivum]	sp|Q38897|BEL1_ARATH;	Homeobox protein BEL1 homolog OS=Arabidopsis thaliana OX=3702 GN=BEL1 PE=1 SV=2;	PF07526.13;PF05920.13;PF00046.31	POX;Homeobox_KN;Homeodomain	Associated with HOX;Homeobox KN domain;Homeodomain
TraesCS4D02G340700	HB-other	0.086667	0.756667	3.1261	up	-	GO:0006355;GO:0005634;GO:000367	BP:regulation of transcription, DNA-templated;CC:nucleus;MF:DNA binding;	------	------	------	------	ENOG410XPMQ	K:Transcription	KAF7055980.1	hypothetical protein CFC21_063444 [Triticum aestivum]	sp|Q38897|BEL1_ARATH;	Homeobox protein BEL1 homolog OS=Arabidopsis thaliana OX=3702 GN=BEL1 PE=1 SV=2;	PF07526.13;PF05920.13;PF00046.31	POX;Homeobox_KN;Homeodomain	Associated with HOX;Homeobox KN domain;Homeodomain
TraesCS4B02G345600	HB-other	0.156667	0.603333	1.94525	up	-	GO:0006355;GO:0005634;GO:000367	BP:regulation of transcription, DNA-templated;CC:nucleus;MF:DNA binding;	------	------	------	------	ENOG410XPMQ	K:Transcription	KAF7051123.1	hypothetical protein CFC21_059399 [Triticum aestivum]	sp|Q38897|BEL1_ARATH;	Homeobox protein BEL1 homolog OS=Arabidopsis thaliana OX=3702 GN=BEL1 PE=1 SV=2;	PF07526.13;PF05920.13;PF00046.31	POX;Homeobox_KN;Homeodomain	Associated with HOX;Homeobox KN domain;Homeodomain
TraesCS4B02G063100	HB-other	0.493333	1.16	1.23349	up	-	GO:0006355;GO:0005634;GO:000367	BP:regulation of transcription, DNA-templated;CC:nucleus;MF:DNA binding;	------	------	------	------	ENOG410XPMQ	K:Transcription	KAF7047699.1	hypothetical protein CFC21_056586 [Triticum aestivum]	sp|Q9SW80|BLH2_ARATH;	BEL1-like homeodomain protein 2 OS=Arabidopsis thaliana OX=3702 GN=BLH2 PE=1 SV=3;	PF07526.13;PF05920.13;PF00046.31	POX;Homeobox_KN;Homeodomain	Associated with HOX;Homeobox KN domain;Homeodomain
TraesCS4A02G016600	HB-other	4.49667	10.5333	1.22803	up	-	GO:0006355;GO:0005634;GO:0043565;GO:0000981;GO:000367	BP:regulation of transcription, DNA-templated;CC:nucleus;MF:sequence-specific DNA binding;MF:RNA polymerase II transcription factor activity, sequence-specific DNA binding;MF:DNA binding;	K09338	HD-ZIP	------	------	ENOG410Z2UE	K:Transcription	KAF7041116.1	hypothetical protein CFC21_050946, partial [Triticum aestivum]	sp|A2XD08|HOX21_ORYSI;	Homeobox-leucine zipper protein HOX21 OS=Oryza sativa subsp. indica OX=39946 GN=HOX21 PE=2 SV=2;	PF02183.20;PF00046.31;PF05920.13	HALZ;Homeodomain;Homeobox_KN	Homeobox associated leucine zipper;Homeodomain;Homeobox KN domain
TraesCS1D02G220900	HB-other	4.32	2.03333	-1.08718	down	-	GO:0006355;GO:0005634;GO:0043565;GO:0003700;GO:0003677;GO:000098	BP:regulation of transcription, DNA-templated;CC:nucleus;MF:sequence-specific DNA binding;MF:transcription factor activity, sequence-specific DNA binding;MF:DNA binding;MF:RNA polymerase II transcription factor activity, sequence-specific DNA binding;	K09338	HD-ZIP	------	------	ENOG410Z2UE	K:Transcription	XP_020169616.1	homeobox-leucine zipper protein HOX1 [Aegilops tauschii subsp. strangulata]	sp|Q05466|HAT4_ARATH;	Homeobox-leucine zipper protein HAT4 OS=Arabidopsis thaliana OX=3702 GN=HAT4 PE=1 SV=1;	PF04618.14;PF00046.31;PF02183.20;PF05920.13	HD-ZIP_N;Homeodomain;HALZ;Homeobox_KN	HD-ZIP protein N terminus;Homeodomain;Homeobox associated leucine zipper;Homeobox KN domain
TraesCS1B02G232700	HB-other	2.66	0.93	-1.51612	down	-	GO:0006355;GO:0005634;GO:0043565;GO:0003700;GO:0003677;GO:000098	BP:regulation of transcription, DNA-templated;CC:nucleus;MF:sequence-specific DNA binding;MF:transcription factor activity, sequence-specific DNA binding;MF:DNA binding;MF:RNA polymerase II transcription factor activity, sequence-specific DNA binding;	K09338	HD-ZIP	------	------	ENOG410Z2UE	K:Transcription	XP_037467589.1	homeobox-leucine zipper protein HOX1-like [Triticum dicoccoides]	sp|Q40691|HOX1_ORYSI;	Homeobox-leucine zipper protein HOX1 OS=Oryza sativa subsp. indica OX=39946 GN=HOX1 PE=1 SV=2;	PF04618.14;PF00046.31;PF02183.20;PF05920.13	HD-ZIP_N;Homeodomain;HALZ;Homeobox_KN	HD-ZIP protein N terminus;Homeodomain;Homeobox associated leucine zipper;Homeobox KN domain
TraesCS3B02G260800	HB-other	2.06	0.733333	-1.4901	down	-	GO:0006355;GO:0006357;GO:0005634;GO:0043565;GO:0003700;GO:0003677;GO:000098	BP:regulation of transcription, DNA-templated;BP:regulation of transcription from RNA polymerase II promoter;CC:nucleus;MF:sequence-specific DNA binding;MF:transcription factor activity, sequence-specific DNA binding;MF:DNA binding;MF:RNA polymerase II transcription factor activity, sequence-specific DNA binding;	K09338	HD-ZIP	------	------	ENOG410Z2UE	K:Transcription	XP_037413324.1	homeobox-leucine zipper protein HOX3 [Triticum dicoccoides]	sp|Q9XH38|HOX3_ORYSI;	Homeobox-leucine zipper protein HOX3 OS=Oryza sativa subsp. indica OX=39946 GN=HOX3 PE=1 SV=1;	PF00046.31;PF02183.20	Homeodomain;HALZ	Homeodomain;Homeobox associated leucine zipper
TraesCS3A02G231600	HB-other	2.61667	0.803333	-1.70366	down	-	GO:0006355;GO:0043565;GO:0000981;GO:000367	BP:regulation of transcription, DNA-templated;MF:sequence-specific DNA binding;MF:RNA polymerase II transcription factor activity, sequence-specific DNA binding;MF:DNA binding;	K09338	HD-ZIP	------	------	ENOG410Z2UE	K:Transcription	XP_037406033.1	homeobox-leucine zipper protein HOX3-like [Triticum dicoccoides]	sp|Q9XH38|HOX3_ORYSI;	Homeobox-leucine zipper protein HOX3 OS=Oryza sativa subsp. indica OX=39946 GN=HOX3 PE=1 SV=1;	PF00046.31;PF02183.20	Homeodomain;HALZ	Homeodomain;Homeobox associated leucine zipper
TraesCS7A02G084000	HB-other	0.086667	0.683333	2.97903	up	-	GO:0006355;GO:0006357;GO:0005634;GO:0043565;GO:0003700;GO:0003677;GO:000098	BP:regulation of transcription, DNA-templated;BP:regulation of transcription from RNA polymerase II promoter;CC:nucleus;MF:sequence-specific DNA binding;MF:transcription factor activity, sequence-specific DNA binding;MF:DNA binding;MF:RNA polymerase II transcription factor activity, sequence-specific DNA binding;	K09338	HD-ZIP	------	------	ENOG410Z2UE	K:Transcription	KAF7093405.1	hypothetical protein CFC21_095819 [Triticum aestivum]	sp|A2Y931|HOX28_ORYSI;	Homeobox-leucine zipper protein HOX28 OS=Oryza sativa subsp. indica OX=39946 GN=HOX28 PE=2 SV=2;	PF00046.31;PF02183.20;PF05920.13	Homeodomain;HALZ;Homeobox_KN	Homeodomain;Homeobox associated leucine zipper;Homeobox KN domain
TraesCS4D02G341000	HB-other	3.43	6.92667	1.01395	up	Homeobox protein knotted-1-like 7 [Source:Projected from Arabidopsis thaliana (AT1G62990) UniProtKB/Swiss-Prot;Acc:Q9FPQ8]	GO:0010214;GO:0010089;GO:0080112;GO:0080001;GO:0006355;GO:0006357;GO:0045892;GO:0010192;GO:2000652;GO:0005634;GO:0003677;GO:0000978;GO:000098	BP:seed coat development;BP:xylem development;BP:seed growth;BP:mucilage extrusion from seed coat;BP:regulation of transcription, DNA-templated;BP:regulation of transcription from RNA polymerase II promoter;BP:negative regulation of transcription, DNA-templated;BP:mucilage biosynthetic process;BP:regulation of secondary cell wall biogenesis;CC:nucleus;MF:DNA binding;MF:RNA polymerase II core prom…	------	------	------	------	ENOG410XPMQ	K:Transcription	VAI10745.1	unnamed protein product [Triticum turgidum subsp. durum]	sp|Q94LW3|KNOS3_ORYSJ;	Homeobox protein knotted-1-like 3 OS=Oryza sativa subsp. japonica OX=39947 GN=HOS66 PE=2 SV=1;	PF03791.15;PF05920.13;PF03790.15;PF00046.31;PF03789.15	KNOX2;Homeobox_KN;KNOX1;Homeodomain;ELK	KNOX2 domain;Homeobox KN domain;KNOX1 domain;Homeodomain;ELK domain
TraesCS4B02G084700	HD-ZIP	47.5833	22.1767	-1.10141	down	-	GO:0006355;GO:0005634;GO:0043565;GO:0008289;GO:0003677;GO:000098	BP:regulation of transcription, DNA-templated;CC:nucleus;MF:sequence-specific DNA binding;MF:lipid binding;MF:DNA binding;MF:RNA polymerase II transcription factor activity, sequence-specific DNA binding;	K09338	HD-ZIP	------	------	ENOG410YIJ3;ENOG411107H	K:Transcription;	KAF7047957.1	hypothetical protein CFC21_056791 [Triticum aestivum]	sp|Q7Y0V7|ROC6_ORYSJ;	Homeobox-leucine zipper protein ROC6 OS=Oryza sativa subsp. japonica OX=39947 GN=ROC6 PE=2 SV=2;	PF01852.21;PF00046.31	START;Homeodomain	START domain;Homeodomain
TraesCS5D02G320600	HD-ZIP	1.05	0.413333	-1.34501	down	-	GO:0006355;GO:0005634;GO:0043565;GO:0008289;GO:0003677;GO:000098	BP:regulation of transcription, DNA-templated;CC:nucleus;MF:sequence-specific DNA binding;MF:lipid binding;MF:DNA binding;MF:RNA polymerase II transcription factor activity, sequence-specific DNA binding;	K09338	HD-ZIP	------	------	ENOG411107H	K:Transcription	KAF7073759.1	hypothetical protein CFC21_078704 [Triticum aestivum]	sp|Q7Y0V7|ROC6_ORYSJ;	Homeobox-leucine zipper protein ROC6 OS=Oryza sativa subsp. japonica OX=39947 GN=ROC6 PE=2 SV=2;	PF01852.21;PF00046.31;PF05920.13	START;Homeodomain;Homeobox_KN	START domain;Homeodomain;Homeobox KN domain
TraesCS3D02G227200	HSF	0.046667	0.796667	4.0935	up	-	GO:0006355;GO:0006357;GO:0034605;GO:0005634;GO:0043565;GO:0003700;GO:0008270;GO:000097	BP:regulation of transcription, DNA-templated;BP:regulation of transcription from RNA polymerase II promoter;BP:cellular response to heat;CC:nucleus;MF:sequence-specific DNA binding;MF:transcription factor activity, sequence-specific DNA binding;MF:zinc ion binding;MF:RNA polymerase II core promoter proximal region sequence-specific DNA binding;	K09419	HSFF	------	------	COG5169	K:Transcription	XP_020162679.1	heat stress transcription factor C-1a [Aegilops tauschii subsp. strangulata]	sp|Q6VBA4|HFC1A_ORYSJ;	Heat stress transcription factor C-1a OS=Oryza sativa subsp. japonica OX=39947 GN=HSFC1A PE=2 SV=2;	PF00447.19	HSF_DNA-bind	HSF-type DNA-binding
TraesCS3A02G229000	HSF	0.14	0.84	2.58496	up	-	GO:0006355;GO:0006357;GO:0034605;GO:0005634;GO:0043565;GO:0003700;GO:0008270;GO:000097	BP:regulation of transcription, DNA-templated;BP:regulation of transcription from RNA polymerase II promoter;BP:cellular response to heat;CC:nucleus;MF:sequence-specific DNA binding;MF:transcription factor activity, sequence-specific DNA binding;MF:zinc ion binding;MF:RNA polymerase II core promoter proximal region sequence-specific DNA binding;	K09419	HSFF	------	------	COG5169	K:Transcription	EMS57624.1	Heat stress transcription factor C-1a [Triticum urartu]	sp|Q6VBA4|HFC1A_ORYSJ;	Heat stress transcription factor C-1a OS=Oryza sativa subsp. japonica OX=39947 GN=HSFC1A PE=2 SV=2;	PF00447.19	HSF_DNA-bind	HSF-type DNA-binding
TraesCS5D02G445100	HSF	3.36333	1.50667	-1.15853	down	Heat stress transcriptioon factor, High-temperature stress tolerance, Tolerance to environmental stresse [Source: Projected from Oryza sativa (Os03g0795900)]	GO:0006355;GO:0006357;GO:0034605;GO:0005634;GO:0043565;GO:0003700;GO:000097	BP:regulation of transcription, DNA-templated;BP:regulation of transcription from RNA polymerase II promoter;BP:cellular response to heat;CC:nucleus;MF:sequence-specific DNA binding;MF:transcription factor activity, sequence-specific DNA binding;MF:RNA polymerase II core promoter proximal region sequence-specific DNA binding;	K09419	HSFF	------	------	COG5169	K:Transcription	QLI63287.1	heat shock transcription factor HsfA2-3 [Triticum aestivum]	sp|Q6F388|HFA2E_ORYSJ;	Heat stress transcription factor A-2e OS=Oryza sativa subsp. japonica OX=39947 GN=HSFA2E PE=2 SV=1;	PF00447.19	HSF_DNA-bind	HSF-type DNA-binding
TraesCS5B02G315600	HSF	7.34667	3.13667	-1.22786	down	Similar to Isoform 2 of Heat stress transcription factor B-2c [Source: Projected from Oryza sativa (Os09g0526600)]	GO:0006355;GO:0006357;GO:0016021;GO:0005634;GO:0043565;GO:0003700;GO:000097	BP:regulation of transcription, DNA-templated;BP:regulation of transcription from RNA polymerase II promoter;CC:integral component of membrane;CC:nucleus;MF:sequence-specific DNA binding;MF:transcription factor activity, sequence-specific DNA binding;MF:RNA polymerase II core promoter proximal region sequence-specific DNA binding;	K09419	HSFF	------	------	COG5169	K:Transcription	KAF7066786.1	hypothetical protein CFC21_072723 [Triticum aestivum]	sp|Q6Z9C8|HFB2B_ORYSJ;	Heat stress transcription factor B-2b OS=Oryza sativa subsp. japonica OX=39947 GN=HSFB2B PE=2 SV=1;	PF00447.19	HSF_DNA-bind	HSF-type DNA-binding
TraesCS1A02G375600	HSF	16.4967	6.94667	-1.24778	down	Heat shock transcription factor A6e [Source:UniProtKB/TrEMBL;Acc:W4ZRM4]	GO:0006355;GO:0006357;GO:0034605;GO:0005634;GO:0043565;GO:0003700;GO:0003677;GO:0000978;GO:004280	BP:regulation of transcription, DNA-templated;BP:regulation of transcription from RNA polymerase II promoter;BP:cellular response to heat;CC:nucleus;MF:sequence-specific DNA binding;MF:transcription factor activity, sequence-specific DNA binding;MF:DNA binding;MF:RNA polymerase II core promoter proximal region sequence-specific DNA binding;MF:identical protein binding;	K09419;K08967	HSFF;mtnD, mtnZ, ADI1	map00270	Cysteine and methionine metabolism	COG5169	K:Transcription	XP_037425119.1	heat stress transcription factor A-2c-like [Triticum dicoccoides]	sp|Q338B0|HFA2C_ORYSJ;	Heat stress transcription factor A-2c OS=Oryza sativa subsp. japonica OX=39947 GN=HSFA2C PE=1 SV=2;	PF00447.19	HSF_DNA-bind	HSF-type DNA-binding
TraesCS5A02G314700	HSF	20.55	7.87	-1.3847	down	Similar to Isoform 2 of Heat stress transcription factor B-2c [Source: Projected from Oryza sativa (Os09g0526600)]	GO:0006355;GO:0006357;GO:0005634;GO:0016021;GO:0043565;GO:0003700;GO:000097	BP:regulation of transcription, DNA-templated;BP:regulation of transcription from RNA polymerase II promoter;CC:nucleus;CC:integral component of membrane;MF:sequence-specific DNA binding;MF:transcription factor activity, sequence-specific DNA binding;MF:RNA polymerase II core promoter proximal region sequence-specific DNA binding;	K09419	HSFF	------	------	COG5169	K:Transcription	KAF7060072.1	hypothetical protein CFC21_066892 [Triticum aestivum]	sp|Q652B0|HFB2C_ORYSJ;	Heat stress transcription factor B-2c OS=Oryza sativa subsp. japonica OX=39947 GN=HSFB2C PE=2 SV=1;	PF00447.19	HSF_DNA-bind	HSF-type DNA-binding
TraesCSU02G127200	HSF	1.39667	0.12	-3.54088	down	-	GO:0006355;GO:0005634;GO:0003700;GO:004356	BP:regulation of transcription, DNA-templated;CC:nucleus;MF:transcription factor activity, sequence-specific DNA binding;MF:sequence-specific DNA binding;	K09419	HSFF	------	------	COG5169	K:Transcription	KAF7037419.1	hypothetical protein CFC21_047789 [Triticum aestivum]	sp|Q0DBL6|HFC2B_ORYSJ;	Heat stress transcription factor C-2b OS=Oryza sativa subsp. japonica OX=39947 GN=HSFC2B PE=3 SV=1;	PF00447.19	HSF_DNA-bind	HSF-type DNA-binding
TraesCS4D02G276500	HSF	2.92	1.03333	-1.49866	down	-	GO:0006355;GO:0006357;GO:0009086;GO:0034605;GO:0005634;GO:0043565;GO:0010309;GO:0003700;GO:000097	BP:regulation of transcription, DNA-templated;BP:regulation of transcription from RNA polymerase II promoter;BP:methionine biosynthetic process;BP:cellular response to heat;CC:nucleus;MF:sequence-specific DNA binding;MF:acireductone dioxygenase [iro;MF:transcription factor activity, sequence-specific DNA binding;MF:RNA polymerase II core promoter proximal region sequence-specific DNA binding;	K09419;K08967	HSFF;mtnD, mtnZ, ADI1	map00270	Cysteine and methionine metabolism	COG5169;COG1791	K:Transcription;S:Function unknown	XP_037427414.1	uncharacterized protein LOC119292822 [Triticum dicoccoides]	sp|Q8H7Y6|HFA2D_ORYSJ;	Heat stress transcription factor A-2d OS=Oryza sativa subsp. japonica OX=39947 GN=HSFA2D PE=2 SV=2;	PF00447.19;PF17675.3	HSF_DNA-bind;APG6_N	HSF-type DNA-binding;Apg6 coiled-coil region
TraesCS6D02G382600	LBD	5.58	2.11333	-1.40075	down	-	GO:0009755;GO:0007275;GO:0045893;GO:000563	BP:hormone-mediated signaling pathway;BP:multicellular organism development;BP:positive regulation of transcription, DNA-templated;CC:nucleus;	K13944	LBD16	------	------	ENOG410YA3N	S:Function unknown	KAF7092149.1	hypothetical protein CFC21_094657 [Triticum aestivum]	sp|Q5UG13|LBD_ORYSJ;	LOB domain-containing protein CRL1 OS=Oryza sativa subsp. japonica OX=39947 GN=CRL1 PE=1 SV=1;	PF03195.16	LOB	Lateral organ boundaries
TraesCS2D02G193400	LBD	12.0033	3.99667	-1.58657	down	-	GO:0010468;GO:000727	BP:regulation of gene expression;BP:multicellular organism development;	------	------	------	------	ENOG4111JGS;ENOG41107JS	S:Function unknown;	KAF7015028.1	hypothetical protein CFC21_028944 [Triticum aestivum]	sp|Q9FN11|LBD37_ARATH;	LOB domain-containing protein 37 OS=Arabidopsis thaliana OX=3702 GN=LBD37 PE=2 SV=1;	PF03195.16	LOB	Lateral organ boundaries
TraesCS2A02G194500	LBD	10.7433	3.29333	-1.70582	down	-	GO:0007275;GO:001046	BP:multicellular organism development;BP:regulation of gene expression;	------	------	------	------	ENOG4111JGS	S:Function unknown	XP_037476641.1	LOB domain-containing protein 37-like [Triticum dicoccoides]	sp|Q9FN11|LBD37_ARATH;	LOB domain-containing protein 37 OS=Arabidopsis thaliana OX=3702 GN=LBD37 PE=2 SV=1;	PF03195.16	LOB	Lateral organ boundaries
TraesCS2B02G212400	LBD	8.68333	2.60667	-1.73604	down	-	GO:0007275;GO:001046	BP:multicellular organism development;BP:regulation of gene expression;	------	------	------	------	ENOG4111JGS	S:Function unknown	KAF7007763.1	hypothetical protein CFC21_022669 [Triticum aestivum]	sp|Q9FN11|LBD37_ARATH;	LOB domain-containing protein 37 OS=Arabidopsis thaliana OX=3702 GN=LBD37 PE=2 SV=1;	PF03195.16	LOB	Lateral organ boundaries
TraesCS3A02G434400	M_type	19.63	9.38333	-1.06489	down	-	GO:0006357;GO:0045944;GO:0006351;GO:0005634;GO:0003677;GO:0046983;GO:0000978;GO:0000981;GO:000097	BP:regulation of transcription from RNA polymerase II promoter;BP:positive regulation of transcription from RNA polymerase II promoter;BP:transcription, DNA-templated;CC:nucleus;MF:DNA binding;MF:protein dimerization activity;MF:RNA polymerase II core promoter proximal region sequence-specific DNA binding;MF:RNA polymerase II transcription factor activity, sequence-specific DNA binding;MF:RNA pol…	------	------	------	------	COG5068	K:Transcription	XP_037407997.1	MADS-box transcription factor 51-like [Triticum dicoccoides]	sp|Q9XJ61|MAD51_ORYSJ;	MADS-box transcription factor 51 OS=Oryza sativa subsp. japonica OX=39947 GN=MADS51 PE=2 SV=1;	PF00319.20	SRF-TF	SRF-type transcription factor
TraesCS3A02G435000	M_type	4.53	1.71667	-1.3999	down	-	GO:0006357;GO:0045944;GO:0006351;GO:0005634;GO:0003677;GO:0046983;GO:0000978;GO:0000981;GO:000097	BP:regulation of transcription from RNA polymerase II promoter;BP:positive regulation of transcription from RNA polymerase II promoter;BP:transcription, DNA-templated;CC:nucleus;MF:DNA binding;MF:protein dimerization activity;MF:RNA polymerase II core promoter proximal region sequence-specific DNA binding;MF:RNA polymerase II transcription factor activity, sequence-specific DNA binding;MF:RNA pol…	------	------	------	------	COG5068	K:Transcription	XP_037407999.1	MADS-box transcription factor 51-like [Triticum dicoccoides]	sp|Q9XJ61|MAD51_ORYSJ;	MADS-box transcription factor 51 OS=Oryza sativa subsp. japonica OX=39947 GN=MADS51 PE=2 SV=1;	PF00319.20	SRF-TF	SRF-type transcription factor
TraesCS3A02G434900	M_type	6.21	2.1	-1.5642	down	-	GO:0006357;GO:0045944;GO:0006351;GO:0005634;GO:0003677;GO:0046983;GO:0000978;GO:0000981;GO:000097	BP:regulation of transcription from RNA polymerase II promoter;BP:positive regulation of transcription from RNA polymerase II promoter;BP:transcription, DNA-templated;CC:nucleus;MF:DNA binding;MF:protein dimerization activity;MF:RNA polymerase II core promoter proximal region sequence-specific DNA binding;MF:RNA polymerase II transcription factor activity, sequence-specific DNA binding;MF:RNA pol…	------	------	------	------	COG5068	K:Transcription	XP_037407998.1	MADS-box transcription factor 51-like [Triticum dicoccoides]	sp|Q9XJ61|MAD51_ORYSJ;	MADS-box transcription factor 51 OS=Oryza sativa subsp. japonica OX=39947 GN=MADS51 PE=2 SV=1;	PF00319.20	SRF-TF	SRF-type transcription factor
TraesCS7D02G388600	M_type	9.50667	2.36333	-2.00812	down	-	GO:0045944;GO:0006351;GO:0005634;GO:0003677;GO:0000987;GO:0046983;GO:0000982;GO:000098	BP:positive regulation of transcription from RNA polymerase II promoter;BP:transcription, DNA-templated;CC:nucleus;MF:DNA binding;MF:core promoter proximal region sequence-specific DNA binding;MF:protein dimerization activity;MF:transcription factor activity, RNA polymerase II core promoter proximal region sequence-specific binding;MF:RNA polymerase II transcription factor activity, sequence-spec…	------	------	------	------	ENOG411154A;COG5068	S:Function unknown;K:Transcription	KAF7110219.1	hypothetical protein CFC21_110358 [Triticum aestivum]	------	------	PF00319.20	SRF-TF	SRF-type transcription factor
TraesCS3D02G428000	M_type	19.8367	8.51667	-1.21981	down	Type I MADS-box protein [Source:UniProtKB/TrEMBL;Acc:G1FP79]	GO:0006357;GO:0045944;GO:0006351;GO:0005634;GO:0003677;GO:0000978;GO:0046983;GO:0000981;GO:000097	BP:regulation of transcription from RNA polymerase II promoter;BP:positive regulation of transcription from RNA polymerase II promoter;BP:transcription, DNA-templated;CC:nucleus;MF:DNA binding;MF:RNA polymerase II core promoter proximal region sequence-specific DNA binding;MF:protein dimerization activity;MF:RNA polymerase II transcription factor activity, sequence-specific DNA binding;MF:RNA pol…	------	------	------	------	COG5068	K:Transcription	KAF7039517.1	hypothetical protein CFC21_049488 [Triticum aestivum]	sp|Q9XJ61|MAD51_ORYSJ;	MADS-box transcription factor 51 OS=Oryza sativa subsp. japonica OX=39947 GN=MADS51 PE=2 SV=1;	PF00319.20;PF12490.10	SRF-TF;BCAS3	SRF-type transcription factor;Breast carcinoma amplified sequence 3
TraesCS3B02G470000	M_type	21.9	7.63	-1.52118	down	-	GO:0006357;GO:0045944;GO:0006351;GO:0005634;GO:0003677;GO:0000978;GO:0046983;GO:0000981;GO:000097	BP:regulation of transcription from RNA polymerase II promoter;BP:positive regulation of transcription from RNA polymerase II promoter;BP:transcription, DNA-templated;CC:nucleus;MF:DNA binding;MF:RNA polymerase II core promoter proximal region sequence-specific DNA binding;MF:protein dimerization activity;MF:RNA polymerase II transcription factor activity, sequence-specific DNA binding;MF:RNA pol…	------	------	------	------	COG5068	K:Transcription	XP_037415451.1	MADS-box transcription factor 51-like [Triticum dicoccoides]	sp|Q9XJ61|MAD51_ORYSJ;	MADS-box transcription factor 51 OS=Oryza sativa subsp. japonica OX=39947 GN=MADS51 PE=2 SV=1;	PF00319.20;PF12490.10	SRF-TF;BCAS3	SRF-type transcription factor;Breast carcinoma amplified sequence 3
TraesCS5D02G118200	M_type	0.313333	1.36	2.11784	up	MADS-box transcription factor TaAGL31 [Source:UniProtKB/TrEMBL;Acc:Q1G161]	GO:0048283;GO:0048481;GO:0006355;GO:0006357;GO:0045944;GO:0006351;GO:0005634;GO:0003700;GO:0000977;GO:0003677;GO:0000978;GO:0046983;GO:000098	BP:indeterminate inflorescence morphogenesis;BP:plant ovule development;BP:regulation of transcription, DNA-templated;BP:regulation of transcription from RNA polymerase II promoter;BP:positive regulation of transcription from RNA polymerase II promoter;BP:transcription, DNA-templated;CC:nucleus;MF:transcription factor activity, sequence-specific DNA binding;MF:RNA polymerase II regulatory region …	------	------	------	------	COG5068	K:Transcription	XP_020189538.1	MADS-box transcription factor 13 [Aegilops tauschii subsp. strangulata]	sp|Q2QW53|MAD13_ORYSJ;	MADS-box transcription factor 13 OS=Oryza sativa subsp. japonica OX=39947 GN=MADS13 PE=1 SV=2;	PF00319.20;PF01486.19	SRF-TF;K-box	SRF-type transcription factor;K-box region
TraesCS6D02G273500	M_type	28.0167	12.4033	-1.17556	down	-	GO:0006355;GO:0006357;GO:0045944;GO:0006351;GO:0005634;GO:0003700;GO:0003677;GO:0046983;GO:0000978;GO:0000981;GO:000097	BP:regulation of transcription, DNA-templated;BP:regulation of transcription from RNA polymerase II promoter;BP:positive regulation of transcription from RNA polymerase II promoter;BP:transcription, DNA-templated;CC:nucleus;MF:transcription factor activity, sequence-specific DNA binding;MF:DNA binding;MF:protein dimerization activity;MF:RNA polymerase II core promoter proximal region sequence-spe…	K09264	K09264	------	------	COG5068	K:Transcription	KAF7090844.1	hypothetical protein CFC21_093533 [Triticum aestivum]	sp|Q6Z6W2|MAD57_ORYSJ;	MADS-box transcription factor 57 OS=Oryza sativa subsp. japonica OX=39947 GN=MADS57 PE=1 SV=2;	PF00319.20;PF01486.19	SRF-TF;K-box	SRF-type transcription factor;K-box region
TraesCS2D02G309300	M_type	2.87333	1.11	-1.37217	down	-	GO:0006355;GO:0006357;GO:0045944;GO:0006351;GO:0005634;GO:0003700;GO:0000977;GO:0003677;GO:0000978;GO:0046983;GO:000098	BP:regulation of transcription, DNA-templated;BP:regulation of transcription from RNA polymerase II promoter;BP:positive regulation of transcription from RNA polymerase II promoter;BP:transcription, DNA-templated;CC:nucleus;MF:transcription factor activity, sequence-specific DNA binding;MF:RNA polymerase II regulatory region sequence-specific DNA binding;MF:DNA binding;MF:RNA polymerase II core p…	------	------	------	------	COG5068	K:Transcription	XP_020194477.1	MADS-box transcription factor 26 [Aegilops tauschii subsp. strangulata]	sp|A2YQK9|MAD26_ORYSI;	MADS-box transcription factor 26 OS=Oryza sativa subsp. indica OX=39946 GN=MADS26 PE=2 SV=2;	PF00319.20;PF01486.19	SRF-TF;K-box	SRF-type transcription factor;K-box region
TraesCS7A02G319400	M_type	4.23333	1.48	-1.5162	down	MADS-box transcription factor, Regulator of both biotic and abiotic stress response [Source: Projected from Oryza sativa (Os08g0112700)]	GO:0006355;GO:0045944;GO:0005634;GO:0003700;GO:0000977;GO:0003677;GO:004698	BP:regulation of transcription, DNA-templated;BP:positive regulation of transcription from RNA polymerase II promoter;CC:nucleus;MF:transcription factor activity, sequence-specific DNA binding;MF:RNA polymerase II regulatory region sequence-specific DNA binding;MF:DNA binding;MF:protein dimerization activity;	------	------	------	------	COG5068	K:Transcription	KAF7096283.1	hypothetical protein CFC21_098252 [Triticum aestivum]	sp|A2YQK9|MAD26_ORYSI;	MADS-box transcription factor 26 OS=Oryza sativa subsp. indica OX=39946 GN=MADS26 PE=2 SV=2;	PF00319.20;PF01486.19	SRF-TF;K-box	SRF-type transcription factor;K-box region
TraesCS6B02G322700	M_type	23.5533	8.07667	-1.5441	down	-	GO:0006355;GO:0006357;GO:0045944;GO:0006351;GO:0005634;GO:0003700;GO:0003677;GO:0046983;GO:0000978;GO:0000981;GO:000097	BP:regulation of transcription, DNA-templated;BP:regulation of transcription from RNA polymerase II promoter;BP:positive regulation of transcription from RNA polymerase II promoter;BP:transcription, DNA-templated;CC:nucleus;MF:transcription factor activity, sequence-specific DNA binding;MF:DNA binding;MF:protein dimerization activity;MF:RNA polymerase II core promoter proximal region sequence-spe…	K09264	K09264	------	------	COG5068	K:Transcription	KAF7085706.1	hypothetical protein CFC21_089104 [Triticum aestivum]	sp|Q6Z6W2|MAD57_ORYSJ;	MADS-box transcription factor 57 OS=Oryza sativa subsp. japonica OX=39947 GN=MADS57 PE=1 SV=2;	PF00319.20;PF01486.19	SRF-TF;K-box	SRF-type transcription factor;K-box region
TraesCS2B02G515800	MYB	7.19	16.4533	1.19432	up	-	GO:0005634;GO:000367	CC:nucleus;MF:DNA binding;	------	------	------	------	ENOG410YGDG	S:Function unknown	KAF7011434.1	hypothetical protein CFC21_025748 [Triticum aestivum]	sp|Q0WVU3|PHL5_ARATH;	Myb family transcription factor PHL5 OS=Arabidopsis thaliana OX=3702 GN=PHL5 PE=2 SV=1;	PF14379.8;PF00249.33	Myb_CC_LHEQLE;Myb_DNA-binding	MYB-CC type transfactor, LHEQLE motif;Myb-like DNA-binding domain
TraesCS5A02G558200	MYB	1.76	4.02667	1.19401	up	-	------	------	------	------	------	------	ENOG410YYXY	K:Transcription	KAF7062870.1	hypothetical protein CFC21_069424 [Triticum aestivum]	sp|Q9C6K3|DF1_ARATH;	Trihelix transcription factor DF1 OS=Arabidopsis thaliana OX=3702 GN=DF1 PE=4 SV=1;	PF13837.8;PF10545.11;PF13921.8	Myb_DNA-bind_4;MADF_DNA_bdg;Myb_DNA-bind_6	Myb/SANT-like DNA-binding domain;Alcohol dehydrogenase transcription factor Myb/SANT-like;Myb-like DNA-binding domain
TraesCS4B02G396900	MYB	1.90667	4.26667	1.16206	up	-	------	------	------	------	------	------	ENOG410YYXY	K:Transcription	VAI11799.1	unnamed protein product [Triticum turgidum subsp. durum]	sp|Q9C6K3|DF1_ARATH;	Trihelix transcription factor DF1 OS=Arabidopsis thaliana OX=3702 GN=DF1 PE=4 SV=1;	PF13837.8;PF10545.11;PF13921.8	Myb_DNA-bind_4;MADF_DNA_bdg;Myb_DNA-bind_6	Myb/SANT-like DNA-binding domain;Alcohol dehydrogenase transcription factor Myb/SANT-like;Myb-like DNA-binding domain
TraesCS3A02G526600	MYB	0.043333	3.01	6.11815	up	LUX-A [Source:UniProtKB/TrEMBL;Acc:W0M071]	GO:0006355;GO:0005634;GO:0003700;GO:000367	BP:regulation of transcription, DNA-templated;CC:nucleus;MF:transcription factor activity, sequence-specific DNA binding;MF:DNA binding;	------	------	------	------	ENOG410XXJ3	K:Transcription	AHG29010.1	LUX-A [Triticum aestivum]	sp|Q94DH3|PCL1_ORYSJ;	Transcription factor PCL1 OS=Oryza sativa subsp. japonica OX=39947 GN=PCL1 PE=2 SV=1;	PF00249.33	Myb_DNA-binding	Myb-like DNA-binding domain
TraesCS3B02G594300	MYB	0.026667	1.59	5.89783	up	LUX-B [Source:UniProtKB/TrEMBL;Acc:W0M178]	GO:0006355;GO:0005634;GO:0003700;GO:000367	BP:regulation of transcription, DNA-templated;CC:nucleus;MF:transcription factor activity, sequence-specific DNA binding;MF:DNA binding;	------	------	------	------	ENOG410XXJ3	K:Transcription	XP_037416249.1	transcription factor PCL1-like [Triticum dicoccoides]	sp|Q94DH3|PCL1_ORYSJ;	Transcription factor PCL1 OS=Oryza sativa subsp. japonica OX=39947 GN=PCL1 PE=2 SV=1;	PF00249.33	Myb_DNA-binding	Myb-like DNA-binding domain
TraesCS3D02G531900	MYB	0.123333	2.71667	4.46121	up	PHYTOCLOCK 1 [Source:UniProtKB/TrEMBL;Acc:A0A1D5WHP5]	GO:0006355;GO:0005634;GO:0003700;GO:000367	BP:regulation of transcription, DNA-templated;CC:nucleus;MF:transcription factor activity, sequence-specific DNA binding;MF:DNA binding;	------	------	------	------	ENOG410XXJ3	K:Transcription	XP_020165352.1	transcription factor PCL1 [Aegilops tauschii subsp. strangulata]	sp|Q94DH3|PCL1_ORYSJ;	Transcription factor PCL1 OS=Oryza sativa subsp. japonica OX=39947 GN=PCL1 PE=2 SV=1;	PF00249.33	Myb_DNA-binding	Myb-like DNA-binding domain
TraesCS3A02G216200	MYB	32.6867	15.8067	-1.04817	down	-	GO:0005634;GO:0008270;GO:0003676;GO:000367	CC:nucleus;MF:zinc ion binding;MF:nucleic acid binding;MF:DNA binding;	------	------	------	------	ENOG410YKJG	K:Transcription	XP_037405821.1	transcription factor MYBS3-like [Triticum dicoccoides]	sp|Q9LVS0|KUA1_ARATH;	Transcription factor KUA1 OS=Arabidopsis thaliana OX=3702 GN=KUA1 PE=1 SV=1;	PF00249.33	Myb_DNA-binding	Myb-like DNA-binding domain
TraesCS3D02G217800	MYB	13.5	6.43333	-1.06932	down	-	GO:0005634;GO:0008270;GO:0003676;GO:000367	CC:nucleus;MF:zinc ion binding;MF:nucleic acid binding;MF:DNA binding;	------	------	------	------	ENOG410YKJG	K:Transcription	KAF7036796.1	hypothetical protein CFC21_047335 [Triticum aestivum]	sp|Q9LVS0|KUA1_ARATH;	Transcription factor KUA1 OS=Arabidopsis thaliana OX=3702 GN=KUA1 PE=1 SV=1;	PF00249.33	Myb_DNA-binding	Myb-like DNA-binding domain
TraesCS7D02G014900	MYB	17.2167	4.9	-1.81295	down	-	GO:0005634;GO:000367	CC:nucleus;MF:DNA binding;	------	------	------	------	COG5269;ENOG4111HV1	K:Transcription;	XP_037458678.1	protein REVEILLE 8-like isoform X1 [Triticum dicoccoides]	sp|Q8RWU3|RVE8_ARATH;	Protein REVEILLE 8 OS=Arabidopsis thaliana OX=3702 GN=RVE8 PE=2 SV=1;	PF00249.33	Myb_DNA-binding	Myb-like DNA-binding domain
TraesCS7A02G017600	MYB	5.2	1.45	-1.84246	down	-	GO:0005634;GO:000367	CC:nucleus;MF:DNA binding;	------	------	------	------	COG5269;ENOG4111HV1	K:Transcription;	XP_037458678.1	protein REVEILLE 8-like isoform X1 [Triticum dicoccoides]	sp|Q8RWU3|RVE8_ARATH;	Protein REVEILLE 8 OS=Arabidopsis thaliana OX=3702 GN=RVE8 PE=2 SV=1;	PF00249.33	Myb_DNA-binding	Myb-like DNA-binding domain
TraesCS4A02G474100	MYB	2.18	0.576667	-1.91852	down	-	GO:0005634;GO:000367	CC:nucleus;MF:DNA binding;	------	------	------	------	COG5269;ENOG4111HV1	K:Transcription;	KAF7046592.1	hypothetical protein CFC21_055614 [Triticum aestivum]	sp|Q8RWU3|RVE8_ARATH;	Protein REVEILLE 8 OS=Arabidopsis thaliana OX=3702 GN=RVE8 PE=2 SV=1;	PF00249.33	Myb_DNA-binding	Myb-like DNA-binding domain
TraesCS7A02G299400	MYB	40.01	8.30667	-2.26802	down	-	GO:0005634;GO:000367	CC:nucleus;MF:DNA binding;	K12133	LHY	map04712	Circadian rhythm - plant	ENOG4111X77	K:Transcription	KAF7096025.1	hypothetical protein CFC21_098040 [Triticum aestivum]	sp|A0A0G3VTN5|LHY_PETHY;	Protein LATE ELONGATED HYPOCOTYL OS=Petunia hybrida OX=4102 GN=LHY PE=2 SV=1;	PF00249.33	Myb_DNA-binding	Myb-like DNA-binding domain
TraesCS6A02G258600	MYB	11.8833	2.40333	-2.30583	down	-	GO:0005634;GO:000367	CC:nucleus;MF:DNA binding;	------	------	------	------	ENOG4111HV1	K:Transcription	KAF7079820.1	hypothetical protein CFC21_083999 [Triticum aestivum]	sp|Q8H0W3|RVE6_ARATH;	Protein REVEILLE 6 OS=Arabidopsis thaliana OX=3702 GN=RVE6 PE=2 SV=1;	PF00249.33	Myb_DNA-binding	Myb-like DNA-binding domain
TraesCS7B02G188000	MYB	51.9533	7.38	-2.81552	down	-	GO:0005634;GO:000367	CC:nucleus;MF:DNA binding;	K12133	LHY	map04712	Circadian rhythm - plant	ENOG4111X77	K:Transcription	KAF7101644.1	hypothetical protein CFC21_102912 [Triticum aestivum]	sp|A0A0G3VTN5|LHY_PETHY;	Protein LATE ELONGATED HYPOCOTYL OS=Petunia hybrida OX=4102 GN=LHY PE=2 SV=1;	PF00249.33	Myb_DNA-binding	Myb-like DNA-binding domain
TraesCS7D02G295400	MYB	64.0867	7.89333	-3.02132	down	-	GO:0005634;GO:000367	CC:nucleus;MF:DNA binding;	K12133	LHY	map04712	Circadian rhythm - plant	ENOG4111X77	K:Transcription	KAF7109084.1	hypothetical protein CFC21_109398 [Triticum aestivum]	sp|A0A0G3VTN5|LHY_PETHY;	Protein LATE ELONGATED HYPOCOTYL OS=Petunia hybrida OX=4102 GN=LHY PE=2 SV=1;	PF00249.33	Myb_DNA-binding	Myb-like DNA-binding domain
TraesCS5B02G407600	MYB	0.53	0.063333	-3.06496	down	-	GO:0006355;GO:0005634;GO:0000976;GO:000367	BP:regulation of transcription, DNA-templated;CC:nucleus;MF:transcription regulatory region sequence-specific DNA binding;MF:DNA binding;	------	------	------	------	ENOG410YIVS	S:Function unknown	KAF7067848.1	hypothetical protein CFC21_073677 [Triticum aestivum]	sp|Q9FJV5|KAN4_ARATH;	Probable transcription factor KAN4 OS=Arabidopsis thaliana OX=3702 GN=KAN4 PE=1 SV=1;	PF00249.33	Myb_DNA-binding	Myb-like DNA-binding domain
TraesCS6B02G349200	MYB	0.703333	6.45333	3.19776	up	-	GO:000367	MF:DNA binding;	K09422	MYBP	------	------	COG5147	K:Transcription	KAF7085993.1	hypothetical protein CFC21_089353 [Triticum aestivum]	sp|Q9S9Z2|MYB93_ARATH;	Transcription factor MYB93 OS=Arabidopsis thaliana OX=3702 GN=MYB93 PE=1 SV=1;	PF00249.33;PF13921.8	Myb_DNA-binding;Myb_DNA-bind_6	Myb-like DNA-binding domain;Myb-like DNA-binding domain
TraesCS2D02G367000	MYB	0.043333	0.39	3.16994	up	-	GO:000367	MF:DNA binding;	K09422	MYBP	------	------	COG5147	K:Transcription	KAF7017327.1	hypothetical protein CFC21_030790 [Triticum aestivum]	sp|Q9M0K4|LAF1_ARATH;	Transcription factor LAF1 OS=Arabidopsis thaliana OX=3702 GN=LAF1 PE=1 SV=2;	PF00249.33;PF13921.8	Myb_DNA-binding;Myb_DNA-bind_6	Myb-like DNA-binding domain;Myb-like DNA-binding domain
TraesCS4B02G052400	MYB	0.15	1.31333	3.1302	up	-	------	------	K09422	MYBP	------	------	COG5147	K:Transcription	KAF7047571.1	hypothetical protein CFC21_056482 [Triticum aestivum]	sp|Q6R0C4|MYB52_ARATH;	Transcription factor MYB52 OS=Arabidopsis thaliana OX=3702 GN=MYB52 PE=2 SV=1;	PF00249.33;PF13921.8	Myb_DNA-binding;Myb_DNA-bind_6	Myb-like DNA-binding domain;Myb-like DNA-binding domain
TraesCS4D02G052600	MYB	0.176667	1.19333	2.75589	up	-	GO:0006355;GO:0005634;GO:0000978;GO:0000981;GO:000367	BP:regulation of transcription, DNA-templated;CC:nucleus;MF:RNA polymerase II core promoter proximal region sequence-specific DNA binding;MF:RNA polymerase II transcription factor activity, sequence-specific DNA binding;MF:DNA binding;	K09422	MYBP	------	------	COG5147	K:Transcription	XP_020166078.1	transcription factor MYB54 [Aegilops tauschii subsp. strangulata]	sp|Q6R0C4|MYB52_ARATH;	Transcription factor MYB52 OS=Arabidopsis thaliana OX=3702 GN=MYB52 PE=2 SV=1;	PF00249.33;PF13921.8	Myb_DNA-binding;Myb_DNA-bind_6	Myb-like DNA-binding domain;Myb-like DNA-binding domain
TraesCS6B02G349100	MYB	1.08333	7.03	2.69805	up	-	GO:000367	MF:DNA binding;	K09422	MYBP	------	------	COG5147	K:Transcription	XP_037452750.1	transcription factor MYB93-like isoform X2 [Triticum dicoccoides]	sp|Q9S9Z2|MYB93_ARATH;	Transcription factor MYB93 OS=Arabidopsis thaliana OX=3702 GN=MYB93 PE=1 SV=1;	PF00249.33;PF13921.8	Myb_DNA-binding;Myb_DNA-bind_6	Myb-like DNA-binding domain;Myb-like DNA-binding domain
TraesCS2D02G444200	MYB	0.293333	1.85333	2.65951	up	-	GO:000367	MF:DNA binding;	K09422	MYBP	------	------	COG5147	K:Transcription	KAF7018252.1	hypothetical protein CFC21_031553 [Triticum aestivum]	sp|P20024|MYB1_MAIZE;	Myb-related protein Zm1 OS=Zea mays OX=4577 PE=2 SV=1;	PF00249.33;PF13921.8	Myb_DNA-binding;Myb_DNA-bind_6	Myb-like DNA-binding domain;Myb-like DNA-binding domain
TraesCS6A02G318900	MYB	0.84	4.85	2.52952	up	-	GO:000367	MF:DNA binding;	K09422	MYBP	------	------	COG5147	K:Transcription	XP_037448373.1	transcription factor MYB93-like [Triticum dicoccoides]	sp|Q9S9Z2|MYB93_ARATH;	Transcription factor MYB93 OS=Arabidopsis thaliana OX=3702 GN=MYB93 PE=1 SV=1;	PF00249.33;PF13921.8	Myb_DNA-binding;Myb_DNA-bind_6	Myb-like DNA-binding domain;Myb-like DNA-binding domain
TraesCS1D02G371400	MYB	0.133333	0.75	2.49186	up	-	GO:0010119;GO:000367	BP:regulation of stomatal movement;MF:DNA binding;	K09422	MYBP	------	------	COG5147	K:Transcription	KAF6997208.1	hypothetical protein CFC21_013455 [Triticum aestivum]	sp|P20027|MYB3_HORVU;	Myb-related protein Hv33 OS=Hordeum vulgare OX=4513 GN=MYB2 PE=2 SV=3;	PF00249.33;PF13921.8	Myb_DNA-binding;Myb_DNA-bind_6	Myb-like DNA-binding domain;Myb-like DNA-binding domain
TraesCS2B02G387800	MYB	0.09	0.436667	2.27854	up	-	GO:000367	MF:DNA binding;	K09422	MYBP	------	------	COG5147	K:Transcription	KAF7010008.1	hypothetical protein CFC21_024485 [Triticum aestivum]	sp|Q9M0K4|LAF1_ARATH;	Transcription factor LAF1 OS=Arabidopsis thaliana OX=3702 GN=LAF1 PE=1 SV=2;	PF00249.33;PF13921.8	Myb_DNA-binding;Myb_DNA-bind_6	Myb-like DNA-binding domain;Myb-like DNA-binding domain
TraesCS4A02G262500	MYB	0.256667	1.16667	2.18442	up	-	GO:0006355;GO:0005634;GO:0000978;GO:000098	BP:regulation of transcription, DNA-templated;CC:nucleus;MF:RNA polymerase II core promoter proximal region sequence-specific DNA binding;MF:RNA polymerase II transcription factor activity, sequence-specific DNA binding;	K09422	MYBP	------	------	COG5147	K:Transcription	KAF7044132.1	hypothetical protein CFC21_053399 [Triticum aestivum]	sp|Q6R0C4|MYB52_ARATH;	Transcription factor MYB52 OS=Arabidopsis thaliana OX=3702 GN=MYB52 PE=2 SV=1;	PF00249.33;PF13921.8	Myb_DNA-binding;Myb_DNA-bind_6	Myb-like DNA-binding domain;Myb-like DNA-binding domain
TraesCS3A02G254500	MYB	0.493333	2.22667	2.17425	up	-	------	------	K09422	MYBP	------	------	COG5147	K:Transcription	KAF7023276.1	hypothetical protein CFC21_035832 [Triticum aestivum]	sp|P20027|MYB3_HORVU;	Myb-related protein Hv33 OS=Hordeum vulgare OX=4513 GN=MYB2 PE=2 SV=3;	PF00249.33;PF13921.8	Myb_DNA-binding;Myb_DNA-bind_6	Myb-like DNA-binding domain;Myb-like DNA-binding domain
TraesCS3D02G255400	MYB	0.376667	1.64	2.12233	up	-	GO:0010119;GO:000367	BP:regulation of stomatal movement;MF:DNA binding;	K09422	MYBP	------	------	COG5147	K:Transcription	XP_020199496.1	myb-related protein Hv33 [Aegilops tauschii subsp. strangulata]	sp|P20027|MYB3_HORVU;	Myb-related protein Hv33 OS=Hordeum vulgare OX=4513 GN=MYB2 PE=2 SV=3;	PF00249.33;PF13921.8	Myb_DNA-binding;Myb_DNA-bind_6	Myb-like DNA-binding domain;Myb-like DNA-binding domain
TraesCS2A02G445500	MYB	0.183333	0.79	2.10739	up	-	GO:000367	MF:DNA binding;	K09422	MYBP	------	------	COG5147	K:Transcription	KAF7003514.1	hypothetical protein CFC21_018815 [Triticum aestivum]	sp|P20024|MYB1_MAIZE;	Myb-related protein Zm1 OS=Zea mays OX=4577 PE=2 SV=1;	PF00249.33;PF13921.8	Myb_DNA-binding;Myb_DNA-bind_6	Myb-like DNA-binding domain;Myb-like DNA-binding domain
TraesCS1B02G279400	MYB	0.78	3.25667	2.06185	up	-	GO:000367	MF:DNA binding;	K09422	MYBP	------	------	COG5147	K:Transcription	KAF6990315.1	hypothetical protein CFC21_007518 [Triticum aestivum]	sp|P81393|MYB08_ANTMA;	Myb-related protein 308 OS=Antirrhinum majus OX=4151 GN=MYB308 PE=2 SV=1;	PF00249.33;PF13921.8	Myb_DNA-binding;Myb_DNA-bind_6	Myb-like DNA-binding domain;Myb-like DNA-binding domain
TraesCS1D02G371700	MYB	0.526667	2.14	2.02265	up	-	GO:0010119;GO:0005634;GO:000367	BP:regulation of stomatal movement;CC:nucleus;MF:DNA binding;	K09422	MYBP	------	------	COG5147	K:Transcription	XP_020180810.1	myb-related protein Hv33 [Aegilops tauschii subsp. strangulata]	sp|P20027|MYB3_HORVU;	Myb-related protein Hv33 OS=Hordeum vulgare OX=4513 GN=MYB2 PE=2 SV=3;	PF00249.33;PF13921.8	Myb_DNA-binding;Myb_DNA-bind_6	Myb-like DNA-binding domain;Myb-like DNA-binding domain
TraesCS6A02G319000	MYB	2.54333	10.0867	1.98766	up	-	GO:000367	MF:DNA binding;	K09422	MYBP	------	------	COG5147	K:Transcription	XP_037448371.1	transcription factor MYB93-like [Triticum dicoccoides]	sp|Q9S9Z2|MYB93_ARATH;	Transcription factor MYB93 OS=Arabidopsis thaliana OX=3702 GN=MYB93 PE=1 SV=1;	PF00249.33;PF13921.8	Myb_DNA-binding;Myb_DNA-bind_6	Myb-like DNA-binding domain;Myb-like DNA-binding domain
TraesCS1D02G268900	MYB	0.656667	2.60333	1.98713	up	R2R3-MYB protein [Source:UniProtKB/TrEMBL;Acc:G9DR66]	GO:000367	MF:DNA binding;	K09422	MYBP	------	------	COG5147	K:Transcription	AEV91143.1	R2R3-MYB protein [Triticum aestivum]	sp|P81393|MYB08_ANTMA;	Myb-related protein 308 OS=Antirrhinum majus OX=4151 GN=MYB308 PE=2 SV=1;	PF00249.33;PF13921.8	Myb_DNA-binding;Myb_DNA-bind_6	Myb-like DNA-binding domain;Myb-like DNA-binding domain
TraesCS2A02G206400	MYB	0.526667	2.02	1.93939	up	MYB transcription factor 80 [Source:UniProtKB/TrEMBL;Acc:W5B5Z3]	GO:000367	MF:DNA binding;	K09422	MYBP	------	------	COG5147	K:Transcription	ATY37760.1	MYB transcription factor 80 [Triticum aestivum]	sp|Q9LDR8|MY102_ARATH;	Transcription factor MYB102 OS=Arabidopsis thaliana OX=3702 GN=MYB102 PE=2 SV=1;	PF00249.33;PF13921.8	Myb_DNA-binding;Myb_DNA-bind_6	Myb-like DNA-binding domain;Myb-like DNA-binding domain
TraesCS2B02G177900	MYB	1.06	4.05	1.93386	up	-	------	------	K09422	MYBP	------	------	COG5147	K:Transcription	KAF7007362.1	hypothetical protein CFC21_022310 [Triticum aestivum]	sp|Q8LPH6|MYB86_ARATH;	Transcription factor MYB86 OS=Arabidopsis thaliana OX=3702 GN=MYB86 PE=2 SV=1;	PF00249.33;PF13921.8	Myb_DNA-binding;Myb_DNA-bind_6	Myb-like DNA-binding domain;Myb-like DNA-binding domain
TraesCS4A02G211100	MYB	0.616667	2.20667	1.83931	up	-	GO:0006355;GO:0005634;GO:0000978;GO:0000981;GO:000367	BP:regulation of transcription, DNA-templated;CC:nucleus;MF:RNA polymerase II core promoter proximal region sequence-specific DNA binding;MF:RNA polymerase II transcription factor activity, sequence-specific DNA binding;MF:DNA binding;	K09422	MYBP	------	------	COG5147	K:Transcription	KAF7043559.1	hypothetical protein CFC21_052894 [Triticum aestivum]	sp|Q6R0C4|MYB52_ARATH;	Transcription factor MYB52 OS=Arabidopsis thaliana OX=3702 GN=MYB52 PE=2 SV=1;	PF00249.33;PF13921.8	Myb_DNA-binding;Myb_DNA-bind_6	Myb-like DNA-binding domain;Myb-like DNA-binding domain
TraesCS2D02G158200	MYB	1.48	5.21333	1.81661	up	-	GO:000367	MF:DNA binding;	K09422	MYBP	------	------	COG5147	K:Transcription	KAF7014600.1	hypothetical protein CFC21_028581 [Triticum aestivum]	sp|Q8LPH6|MYB86_ARATH;	Transcription factor MYB86 OS=Arabidopsis thaliana OX=3702 GN=MYB86 PE=2 SV=1;	PF00249.33;PF13921.8	Myb_DNA-binding;Myb_DNA-bind_6	Myb-like DNA-binding domain;Myb-like DNA-binding domain
TraesCS4D02G102100	MYB	0.386667	1.30333	1.75304	up	-	GO:0006355;GO:0005634;GO:0000978;GO:0000981;GO:000367	BP:regulation of transcription, DNA-templated;CC:nucleus;MF:RNA polymerase II core promoter proximal region sequence-specific DNA binding;MF:RNA polymerase II transcription factor activity, sequence-specific DNA binding;MF:DNA binding;	K09422	MYBP	------	------	COG5147	K:Transcription	XP_020156227.1	transcription factor CSA [Aegilops tauschii subsp. strangulata]	sp|Q6R0C4|MYB52_ARATH;	Transcription factor MYB52 OS=Arabidopsis thaliana OX=3702 GN=MYB52 PE=2 SV=1;	PF00249.33;PF13921.8	Myb_DNA-binding;Myb_DNA-bind_6	Myb-like DNA-binding domain;Myb-like DNA-binding domain
TraesCS4B02G105200	MYB	0.616667	2.05	1.73306	up	-	GO:0006355;GO:0005634;GO:0000978;GO:0000981;GO:000367	BP:regulation of transcription, DNA-templated;CC:nucleus;MF:RNA polymerase II core promoter proximal region sequence-specific DNA binding;MF:RNA polymerase II transcription factor activity, sequence-specific DNA binding;MF:DNA binding;	K09422	MYBP	------	------	COG5147	K:Transcription	KAF7048188.1	hypothetical protein CFC21_056994 [Triticum aestivum]	sp|Q6R0C4|MYB52_ARATH;	Transcription factor MYB52 OS=Arabidopsis thaliana OX=3702 GN=MYB52 PE=2 SV=1;	PF00249.33;PF13921.8	Myb_DNA-binding;Myb_DNA-bind_6	Myb-like DNA-binding domain;Myb-like DNA-binding domain
TraesCS2D02G444300	MYB	0.433333	1.40333	1.69531	up	-	GO:000367	MF:DNA binding;	K09422	MYBP	------	------	COG5147	K:Transcription	KAF7018253.1	hypothetical protein CFC21_031554 [Triticum aestivum]	sp|P20024|MYB1_MAIZE;	Myb-related protein Zm1 OS=Zea mays OX=4577 PE=2 SV=1;	PF00249.33;PF13921.8	Myb_DNA-binding;Myb_DNA-bind_6	Myb-like DNA-binding domain;Myb-like DNA-binding domain
TraesCS2D02G158300	MYB	0.33	1.01667	1.62331	up	-	GO:000367	MF:DNA binding;	K09422	MYBP	------	------	COG5147	K:Transcription	KAF7014601.1	hypothetical protein CFC21_028582 [Triticum aestivum]	sp|Q8LPH6|MYB86_ARATH;	Transcription factor MYB86 OS=Arabidopsis thaliana OX=3702 GN=MYB86 PE=2 SV=1;	PF00249.33;PF13921.8	Myb_DNA-binding;Myb_DNA-bind_6	Myb-like DNA-binding domain;Myb-like DNA-binding domain
TraesCS3B02G286500	MYB	0.423333	1.24333	1.55435	up	-	GO:0010119;GO:000367	BP:regulation of stomatal movement;MF:DNA binding;	K09422	MYBP	------	------	COG5147	K:Transcription	XP_037413648.1	myb-related protein Hv33-like [Triticum dicoccoides]	sp|P20027|MYB3_HORVU;	Myb-related protein Hv33 OS=Hordeum vulgare OX=4513 GN=MYB2 PE=2 SV=3;	PF00249.33;PF13921.8	Myb_DNA-binding;Myb_DNA-bind_6	Myb-like DNA-binding domain;Myb-like DNA-binding domain
TraesCS4A02G217800	MYB	0.783333	2.23	1.50935	up	-	------	------	K09422	MYBP	------	------	COG5147	K:Transcription	VAH93988.1	unnamed protein product [Triticum turgidum subsp. durum]	sp|F1B281|EBIII_PETHY;	MYB-like transcription factor 4 OS=Petunia hybrida OX=4102 GN=MYB4 PE=2 SV=1;	PF00249.33;PF13921.8	Myb_DNA-binding;Myb_DNA-bind_6	Myb-like DNA-binding domain;Myb-like DNA-binding domain
TraesCS1A02G268800	MYB	0.78	2.14333	1.45831	up	-	GO:000367	MF:DNA binding;	K09422	MYBP	------	------	COG5147	K:Transcription	KAF6984840.1	hypothetical protein CFC21_002788 [Triticum aestivum]	sp|P81393|MYB08_ANTMA;	Myb-related protein 308 OS=Antirrhinum majus OX=4151 GN=MYB308 PE=2 SV=1;	PF00249.33;PF13921.8	Myb_DNA-binding;Myb_DNA-bind_6	Myb-like DNA-binding domain;Myb-like DNA-binding domain
TraesCS6D02G298200	MYB	3.29667	8.86333	1.42684	up	-	GO:000367	MF:DNA binding;	K09422	MYBP	------	------	COG5147	K:Transcription	KAF7091158.1	hypothetical protein CFC21_093800 [Triticum aestivum]	sp|Q9S9Z2|MYB93_ARATH;	Transcription factor MYB93 OS=Arabidopsis thaliana OX=3702 GN=MYB93 PE=1 SV=1;	PF00249.33;PF13921.8	Myb_DNA-binding;Myb_DNA-bind_6	Myb-like DNA-binding domain;Myb-like DNA-binding domain
TraesCS6B02G053100	MYB	1.52667	3.93667	1.36659	up	-	GO:000367	MF:DNA binding;	K09422	MYBP	------	------	COG5147	K:Transcription	KAF7077163.1	hypothetical protein CFC21_081747 [Triticum aestivum]	sp|Q8LPH6|MYB86_ARATH;	Transcription factor MYB86 OS=Arabidopsis thaliana OX=3702 GN=MYB86 PE=2 SV=1;	PF00249.33;PF13921.8	Myb_DNA-binding;Myb_DNA-bind_6	Myb-like DNA-binding domain;Myb-like DNA-binding domain
TraesCS2A02G370300	MYB	0.846667	2.16	1.35116	up	-	GO:000367	MF:DNA binding;	K09422	MYBP	------	------	COG5147	K:Transcription	KAF7002245.1	hypothetical protein CFC21_017753 [Triticum aestivum]	sp|Q9M0K4|LAF1_ARATH;	Transcription factor LAF1 OS=Arabidopsis thaliana OX=3702 GN=LAF1 PE=1 SV=2;	PF00249.33;PF13921.8	Myb_DNA-binding;Myb_DNA-bind_6	Myb-like DNA-binding domain;Myb-like DNA-binding domain
TraesCS6B02G292500	MYB	0.466667	1.18667	1.34645	up	-	GO:000367	MF:DNA binding;	K09422	MYBP	------	------	COG5147	K:Transcription	XP_037451200.1	myb-related protein Zm1-like [Triticum dicoccoides]	sp|P20024|MYB1_MAIZE;	Myb-related protein Zm1 OS=Zea mays OX=4577 PE=2 SV=1;	PF00249.33;PF13921.8	Myb_DNA-binding;Myb_DNA-bind_6	Myb-like DNA-binding domain;Myb-like DNA-binding domain
TraesCS6D02G043600	MYB	1.84	4.52667	1.29874	up	-	GO:000367	MF:DNA binding;	K09422	MYBP	------	------	COG5147	K:Transcription	KAF7077163.1	hypothetical protein CFC21_081747 [Triticum aestivum]	sp|Q8LPH6|MYB86_ARATH;	Transcription factor MYB86 OS=Arabidopsis thaliana OX=3702 GN=MYB86 PE=2 SV=1;	PF00249.33;PF13921.8	Myb_DNA-binding;Myb_DNA-bind_6	Myb-like DNA-binding domain;Myb-like DNA-binding domain
TraesCS2A02G152700	MYB	1.76667	4.32667	1.29223	up	-	GO:000367	MF:DNA binding;	K09422	MYBP	------	------	COG5147	K:Transcription	KAF6999901.1	hypothetical protein CFC21_015875 [Triticum aestivum]	sp|Q8LPH6|MYB86_ARATH;	Transcription factor MYB86 OS=Arabidopsis thaliana OX=3702 GN=MYB86 PE=2 SV=1;	PF00249.33;PF13921.8	Myb_DNA-binding;Myb_DNA-bind_6	Myb-like DNA-binding domain;Myb-like DNA-binding domain
TraesCS1A02G083100	MYB	1.06	2.47	1.22045	up	-	GO:001011	BP:regulation of stomatal movement;	K09422	MYBP	------	------	COG5147	K:Transcription	KAE8806364.1	Transcription factor MYB86 [Hordeum vulgare]	sp|Q8VZQ2|MYB61_ARATH;	Transcription factor MYB61 OS=Arabidopsis thaliana OX=3702 GN=MYB61 PE=2 SV=1;	PF00249.33;PF13921.8	Myb_DNA-binding;Myb_DNA-bind_6	Myb-like DNA-binding domain;Myb-like DNA-binding domain
TraesCS1D02G084400	MYB	2.16667	4.99667	1.20549	up	-	GO:0010119;GO:000367	BP:regulation of stomatal movement;MF:DNA binding;	K09422	MYBP	------	------	COG5147	K:Transcription	KAE8806364.1	Transcription factor MYB86 [Hordeum vulgare]	sp|Q8VZQ2|MYB61_ARATH;	Transcription factor MYB61 OS=Arabidopsis thaliana OX=3702 GN=MYB61 PE=2 SV=1;	PF00249.33;PF13921.8	Myb_DNA-binding;Myb_DNA-bind_6	Myb-like DNA-binding domain;Myb-like DNA-binding domain
TraesCS6D02G298100	MYB	3.82	8.55667	1.16348	up	-	------	------	K09422	MYBP	------	------	COG5147	K:Transcription	KAF7091157.1	hypothetical protein CFC21_093799 [Triticum aestivum]	sp|Q9S9Z2|MYB93_ARATH;	Transcription factor MYB93 OS=Arabidopsis thaliana OX=3702 GN=MYB93 PE=1 SV=1;	PF00249.33;PF13921.8	Myb_DNA-binding;Myb_DNA-bind_6	Myb-like DNA-binding domain;Myb-like DNA-binding domain
TraesCS5D02G095600	MYB	4.85333	10.6667	1.13606	up	-	GO:0003700;GO:004356	MF:transcription factor activity, sequence-specific DNA binding;MF:sequence-specific DNA binding;	K09422	MYBP	------	------	COG5147	K:Transcription	XP_040244959.1	myb-related protein MYBAS2 [Aegilops tauschii subsp. strangulata]	sp|Q4JL76|MYBA2_ORYSJ;	Myb-related protein MYBAS2 OS=Oryza sativa subsp. japonica OX=39947 GN=MYBAS2 PE=2 SV=1;	PF00249.33;PF13921.8	Myb_DNA-binding;Myb_DNA-bind_6	Myb-like DNA-binding domain;Myb-like DNA-binding domain
TraesCS6A02G037700	MYB	1.33333	2.89	1.11603	up	-	GO:000367	MF:DNA binding;	K09422	MYBP	------	------	COG5147	K:Transcription	KAF7077163.1	hypothetical protein CFC21_081747 [Triticum aestivum]	sp|Q8LPH6|MYB86_ARATH;	Transcription factor MYB86 OS=Arabidopsis thaliana OX=3702 GN=MYB86 PE=2 SV=1;	PF00249.33;PF13921.8	Myb_DNA-binding;Myb_DNA-bind_6	Myb-like DNA-binding domain;Myb-like DNA-binding domain
TraesCS1B02G383700	MYB	0.9	1.94333	1.11054	up	R2R3-type MYB protein [Source:UniProtKB/TrEMBL;Acc:A0A1D5S800]	GO:0010119;GO:0005634;GO:000367	BP:regulation of stomatal movement;CC:nucleus;MF:DNA binding;	K09422	MYBP	------	------	COG5147	K:Transcription	AQA28692.1	R2R3-type MYB protein [Triticum aestivum]	sp|P20027|MYB3_HORVU;	Myb-related protein Hv33 OS=Hordeum vulgare OX=4513 GN=MYB2 PE=2 SV=3;	PF00249.33;PF13921.8	Myb_DNA-binding;Myb_DNA-bind_6	Myb-like DNA-binding domain;Myb-like DNA-binding domain
TraesCS7D02G514800	MYB	5.34333	2.54667	-1.06913	down	-	GO:000367	MF:DNA binding;	------	------	------	------	COG5147	K:Transcription	KAF7111661.1	hypothetical protein CFC21_111643 [Triticum aestivum]	sp|Q9FDW1|MYB44_ARATH;	Transcription factor MYB44 OS=Arabidopsis thaliana OX=3702 GN=MYB44 PE=1 SV=1;	PF00249.33;PF13921.8	Myb_DNA-binding;Myb_DNA-bind_6	Myb-like DNA-binding domain;Myb-like DNA-binding domain
TraesCS4A02G452600	MYB	5.51667	2.57	-1.10203	down	MYB-related protein [Source:UniProtKB/TrEMBL;Acc:G9DRB1]	GO:0009744;GO:0009751;GO:0045893;GO:0009739;GO:0005737;GO:0005634;GO:0003700;GO:0003677;GO:004280	BP:response to sucrose;BP:response to salicylic acid;BP:positive regulation of transcription, DNA-templated;BP:response to gibberellin;CC:cytoplasm;CC:nucleus;MF:transcription factor activity, sequence-specific DNA binding;MF:DNA binding;MF:protein homodimerization activity;	------	------	------	------	COG5269;ENOG410YG84	K:Transcription;	XP_037423696.1	transcription factor MYBS1-like [Triticum dicoccoides]	sp|B8A9B2|MYBS1_ORYSI;	Transcription factor MYBS1 OS=Oryza sativa subsp. indica OX=39946 GN=MYBS1 PE=3 SV=1;	PF00249.33;PF13921.8	Myb_DNA-binding;Myb_DNA-bind_6	Myb-like DNA-binding domain;Myb-like DNA-binding domain
TraesCS1D02G043300	MYB	440.253	201.907	-1.12465	down	-	GO:0006355;GO:0005634;GO:0003700;GO:0043565;GO:000367	BP:regulation of transcription, DNA-templated;CC:nucleus;MF:transcription factor activity, sequence-specific DNA binding;MF:sequence-specific DNA binding;MF:DNA binding;	K09422	MYBP	------	------	COG5147	K:Transcription	XP_037448561.1	transcription factor MYB59-like [Triticum dicoccoides]	sp|Q4JL76|MYBA2_ORYSJ;	Myb-related protein MYBAS2 OS=Oryza sativa subsp. japonica OX=39947 GN=MYBAS2 PE=2 SV=1;	PF00249.33;PF13921.8	Myb_DNA-binding;Myb_DNA-bind_6	Myb-like DNA-binding domain;Myb-like DNA-binding domain
TraesCS4B02G231300	MYB	4.35333	1.83333	-1.24765	down	-	GO:000367	MF:DNA binding;	------	------	------	------	COG5147	K:Transcription	KAF7041823.1	hypothetical protein CFC21_051561 [Triticum aestivum]	sp|Q9SN12|MYB77_ARATH;	Transcription factor MYB77 OS=Arabidopsis thaliana OX=3702 GN=MYB77 PE=1 SV=1;	PF00249.33;PF13921.8	Myb_DNA-binding;Myb_DNA-bind_6	Myb-like DNA-binding domain;Myb-like DNA-binding domain
TraesCS7D02G032700	MYB	5.49333	1.93333	-1.50659	down	-	GO:0009744;GO:0009751;GO:0045893;GO:0009739;GO:0005737;GO:0005634;GO:0003700;GO:0003677;GO:004280	BP:response to sucrose;BP:response to salicylic acid;BP:positive regulation of transcription, DNA-templated;BP:response to gibberellin;CC:cytoplasm;CC:nucleus;MF:transcription factor activity, sequence-specific DNA binding;MF:DNA binding;MF:protein homodimerization activity;	------	------	------	------	COG5269;ENOG410YG84	K:Transcription;	XP_020147245.1	transcription factor MYBS1 [Aegilops tauschii subsp. strangulata]	sp|B8A9B2|MYBS1_ORYSI;	Transcription factor MYBS1 OS=Oryza sativa subsp. indica OX=39946 GN=MYBS1 PE=3 SV=1;	PF00249.33;PF13921.8	Myb_DNA-binding;Myb_DNA-bind_6	Myb-like DNA-binding domain;Myb-like DNA-binding domain
TraesCS3D02G540600	MYB	76.09	26.7267	-1.50943	down	MYB-related protein [Source:UniProtKB/TrEMBL;Acc:G9DRA2]	GO:0006355;GO:0005634;GO:0003700;GO:0043565;GO:000367	BP:regulation of transcription, DNA-templated;CC:nucleus;MF:transcription factor activity, sequence-specific DNA binding;MF:sequence-specific DNA binding;MF:DNA binding;	K09422	MYBP	------	------	COG5147	K:Transcription	AER38259.1	MYB13-3 [Triticum aestivum]	sp|Q4JL76|MYBA2_ORYSJ;	Myb-related protein MYBAS2 OS=Oryza sativa subsp. japonica OX=39947 GN=MYBAS2 PE=2 SV=1;	PF00249.33;PF13921.8	Myb_DNA-binding;Myb_DNA-bind_6	Myb-like DNA-binding domain;Myb-like DNA-binding domain
TraesCS3B02G612200	MYB	193.36	65.81	-1.55491	down	MYB protein [Source:UniProtKB/TrEMBL;Acc:I6U7F1]	GO:0006355;GO:0005634;GO:0003700;GO:0043565;GO:000367	BP:regulation of transcription, DNA-templated;CC:nucleus;MF:transcription factor activity, sequence-specific DNA binding;MF:sequence-specific DNA binding;MF:DNA binding;	K09422	MYBP	------	------	COG5147	K:Transcription	AFM85452.1	MYB protein [Triticum aestivum]	sp|Q4JL76|MYBA2_ORYSJ;	Myb-related protein MYBAS2 OS=Oryza sativa subsp. japonica OX=39947 GN=MYBAS2 PE=2 SV=1;	PF00249.33;PF13921.8	Myb_DNA-binding;Myb_DNA-bind_6	Myb-like DNA-binding domain;Myb-like DNA-binding domain
TraesCS3A02G535100	MYB	501.2	162	-1.62939	down	MYB13 transcription factor [Source:UniProtKB/TrEMBL;Acc:S4V9N0]	GO:0006355;GO:0005634;GO:0003700;GO:0043565;GO:000367	BP:regulation of transcription, DNA-templated;CC:nucleus;MF:transcription factor activity, sequence-specific DNA binding;MF:sequence-specific DNA binding;MF:DNA binding;	K09422	MYBP	------	------	COG5147	K:Transcription	AGO59325.1	MYB13 transcription factor [Triticum aestivum]	sp|Q4JL76|MYBA2_ORYSJ;	Myb-related protein MYBAS2 OS=Oryza sativa subsp. japonica OX=39947 GN=MYBAS2 PE=2 SV=1;	PF00249.33;PF13921.8	Myb_DNA-binding;Myb_DNA-bind_6	Myb-like DNA-binding domain;Myb-like DNA-binding domain
TraesCS5A02G227400	MYB	0.696667	0.196667	-1.82471	down	-	GO:0009733;GO:000367	BP:response to auxin;MF:DNA binding;	K09422	MYBP	------	------	COG5147	K:Transcription	XP_037434609.1	myb-related protein 306-like [Triticum dicoccoides]	sp|P81392|MYB06_ANTMA;	Myb-related protein 306 OS=Antirrhinum majus OX=4151 GN=MYB306 PE=2 SV=1;	PF00249.33;PF13921.8	Myb_DNA-binding;Myb_DNA-bind_6	Myb-like DNA-binding domain;Myb-like DNA-binding domain
TraesCS6D02G241900	MYB	1.64	0.37	-2.1481	down	-	GO:0005634;GO:000367	CC:nucleus;MF:DNA binding;	------	------	------	------	ENOG4111X77	K:Transcription	XP_020193937.1	protein REVEILLE 1 [Aegilops tauschii subsp. strangulata]	sp|F4KGY6|RVE1_ARATH;	Protein REVEILLE 1 OS=Arabidopsis thaliana OX=3702 GN=RVE1 PE=1 SV=1;	PF00249.33;PF13921.8	Myb_DNA-binding;Myb_DNA-bind_6	Myb-like DNA-binding domain;Myb-like DNA-binding domain
TraesCS7A02G553800	MYB	16.5467	3.07333	-2.42866	down	-	GO:0005634;GO:000367	CC:nucleus;MF:DNA binding;	------	------	------	------	ENOG4111HV1	K:Transcription	XP_037460342.1	protein LHY-like isoform X1 [Triticum dicoccoides]	sp|F4K5X6|RVE2_ARATH;	Protein REVEILLE 2 OS=Arabidopsis thaliana OX=3702 GN=RVE2 PE=1 SV=1;	PF00249.33;PF13921.8	Myb_DNA-binding;Myb_DNA-bind_6	Myb-like DNA-binding domain;Myb-like DNA-binding domain
TraesCS6A02G261100	MYB	1.97667	0.333333	-2.56803	down	-	GO:0005634;GO:000367	CC:nucleus;MF:DNA binding;	------	------	------	------	ENOG4111X77	K:Transcription	XP_037447811.1	protein REVEILLE 1-like isoform X2 [Triticum dicoccoides]	sp|F4KGY6|RVE1_ARATH;	Protein REVEILLE 1 OS=Arabidopsis thaliana OX=3702 GN=RVE1 PE=1 SV=1;	PF00249.33;PF13921.8	Myb_DNA-binding;Myb_DNA-bind_6	Myb-like DNA-binding domain;Myb-like DNA-binding domain
TraesCS6B02G288500	MYB	1.56333	0.2	-2.96655	down	MYB-related protein [Source:UniProtKB/TrEMBL;Acc:G9DRA4]	GO:0005634;GO:000367	CC:nucleus;MF:DNA binding;	------	------	------	------	ENOG4111X77	K:Transcription	XP_037452656.1	protein REVEILLE 1-like [Triticum dicoccoides]	sp|F4KGY6|RVE1_ARATH;	Protein REVEILLE 1 OS=Arabidopsis thaliana OX=3702 GN=RVE1 PE=1 SV=1;	PF00249.33;PF13921.8	Myb_DNA-binding;Myb_DNA-bind_6	Myb-like DNA-binding domain;Myb-like DNA-binding domain
TraesCS7D02G540700	MYB	12.79	2.42333	-2.39995	down	-	GO:0005634;GO:000367	CC:nucleus;MF:DNA binding;	------	------	------	------	ENOG4111HV1	K:Transcription	XP_020180978.1	protein LHY isoform X1 [Aegilops tauschii subsp. strangulata]	sp|F4K5X6|RVE2_ARATH;	Protein REVEILLE 2 OS=Arabidopsis thaliana OX=3702 GN=RVE2 PE=1 SV=1;	PF00249.33;PF13921.8;PF15963.7	Myb_DNA-binding;Myb_DNA-bind_6;Myb_DNA-bind_7	Myb-like DNA-binding domain;Myb-like DNA-binding domain;Myb DNA-binding like
TraesCS7B02G478200	MYB	13.11	2.13333	-2.61949	down	-	GO:0005634;GO:000367	CC:nucleus;MF:DNA binding;	------	------	------	------	ENOG4111HV1	K:Transcription	KAF7105202.1	hypothetical protein CFC21_106034 [Triticum aestivum]	sp|F4K5X6|RVE2_ARATH;	Protein REVEILLE 2 OS=Arabidopsis thaliana OX=3702 GN=RVE2 PE=1 SV=1;	PF00249.33;PF13921.8;PF15963.7	Myb_DNA-binding;Myb_DNA-bind_6;Myb_DNA-bind_7	Myb-like DNA-binding domain;Myb-like DNA-binding domain;Myb DNA-binding like
TraesCS6B02G266800	MYB	8.26667	1.79333	-2.20466	down	-	GO:0005634;GO:000367	CC:nucleus;MF:DNA binding;	------	------	------	------	ENOG4111HV1	K:Transcription	VAI59495.1	unnamed protein product [Triticum turgidum subsp. durum]	sp|Q8H0W3|RVE6_ARATH;	Protein REVEILLE 6 OS=Arabidopsis thaliana OX=3702 GN=RVE6 PE=2 SV=1;	PF00249.33;PF15963.7	Myb_DNA-binding;Myb_DNA-bind_7	Myb-like DNA-binding domain;Myb DNA-binding like
TraesCS6D02G239800	MYB	14.38	2.22667	-2.69111	down	-	GO:0005634;GO:000367	CC:nucleus;MF:DNA binding;	------	------	------	------	ENOG4111HV1	K:Transcription	XP_020182046.1	protein REVEILLE 6 isoform X1 [Aegilops tauschii subsp. strangulata]	sp|Q8H0W3|RVE6_ARATH;	Protein REVEILLE 6 OS=Arabidopsis thaliana OX=3702 GN=RVE6 PE=2 SV=1;	PF00249.33;PF15963.7	Myb_DNA-binding;Myb_DNA-bind_7	Myb-like DNA-binding domain;Myb DNA-binding like
TraesCS1D02G082400	MYB	4.28667	1.32667	-1.69205	down	-	GO:0006511;GO:0000209;GO:0005634;GO:0061631;GO:0016740;GO:0003677;GO:000552	BP:ubiquitin-dependent protein catabolic process;BP:protein polyubiquitination;CC:nucleus;MF:ubiquitin conjugating enzyme activity;MF:transferase activity;MF:DNA binding;MF:ATP binding;	K06689	UBE2D, UBC4, UBC5	map04120;map04141	Ubiquitin mediated proteolysis;Protein processing in endoplasmic reticulum	COG5078	O:Posttranslational modification, protein turnover, chaperones	KAF6993635.1	hypothetical protein CFC21_010501 [Triticum aestivum]	sp|Q94F47|UBC28_ARATH;	Ubiquitin-conjugating enzyme E2 28 OS=Arabidopsis thaliana OX=3702 GN=UBC28 PE=1 SV=1;	PF00179.28	UQ_con	Ubiquitin-conjugating enzyme
TraesCS7D02G062400	NAC	0.053333	0.676667	3.66535	up	-	GO:0006355;GO:0005634;GO:000367	BP:regulation of transcription, DNA-templated;CC:nucleus;MF:DNA binding;	------	------	------	------	ENOG410YG0P	K:Transcription	KAF7106248.1	hypothetical protein CFC21_106992 [Triticum aestivum]	sp|Q84WP6|NAC43_ARATH;	NAC domain-containing protein 43 OS=Arabidopsis thaliana OX=3702 GN=NAC043 PE=2 SV=2;	PF02365.17	NAM	No apical meristem
TraesCS7D02G314000	NAC	0.106667	1.09333	3.35755	up	-	GO:0006355;GO:0005634;GO:000367	BP:regulation of transcription, DNA-templated;CC:nucleus;MF:DNA binding;	------	------	------	------	ENOG410YG0P	K:Transcription	XP_040253183.1	NAC domain-containing protein 43 isoform X1 [Aegilops tauschii subsp. strangulata]	sp|Q84WP6|NAC43_ARATH;	NAC domain-containing protein 43 OS=Arabidopsis thaliana OX=3702 GN=NAC043 PE=2 SV=2;	PF02365.17	NAM	No apical meristem
TraesCS7D02G062600	NAC	0.07	0.693333	3.30812	up	-	GO:0006355;GO:0005634;GO:000367	BP:regulation of transcription, DNA-templated;CC:nucleus;MF:DNA binding;	------	------	------	------	ENOG410YG0P	K:Transcription	KAF7106250.1	hypothetical protein CFC21_106994 [Triticum aestivum]	sp|Q84WP6|NAC43_ARATH;	NAC domain-containing protein 43 OS=Arabidopsis thaliana OX=3702 GN=NAC043 PE=2 SV=2;	PF02365.17	NAM	No apical meristem
TraesCS4A02G420100	NAC	0.1	0.946667	3.24286	up	-	GO:0006355;GO:0005634;GO:000367	BP:regulation of transcription, DNA-templated;CC:nucleus;MF:DNA binding;	------	------	------	------	ENOG410YG0P	K:Transcription	KAF7045952.1	hypothetical protein CFC21_055013 [Triticum aestivum]	sp|Q84WP6|NAC43_ARATH;	NAC domain-containing protein 43 OS=Arabidopsis thaliana OX=3702 GN=NAC043 PE=2 SV=2;	PF02365.17	NAM	No apical meristem
TraesCS7D02G062100	NAC	0.69	3.89667	2.49757	up	-	GO:0006355;GO:0005634;GO:000367	BP:regulation of transcription, DNA-templated;CC:nucleus;MF:DNA binding;	------	------	------	------	ENOG410YG0P	K:Transcription	KAF7106246.1	hypothetical protein CFC21_106990 [Triticum aestivum]	sp|Q84WP6|NAC43_ARATH;	NAC domain-containing protein 43 OS=Arabidopsis thaliana OX=3702 GN=NAC043 PE=2 SV=2;	PF02365.17	NAM	No apical meristem
TraesCS4D02G071200	NAC	0.25	1.14667	2.19745	up	-	GO:0006355;GO:0005634;GO:000367	BP:regulation of transcription, DNA-templated;CC:nucleus;MF:DNA binding;	------	------	------	------	ENOG410YEYV	S:Function unknown	VAH94430.1	unnamed protein product [Triticum turgidum subsp. durum]	sp|O04017|NAC98_ARATH;	Protein CUP-SHAPED COTYLEDON 2 OS=Arabidopsis thaliana OX=3702 GN=NAC098 PE=1 SV=1;	PF02365.17	NAM	No apical meristem
TraesCS7A02G317100	NAC	0.17	0.763333	2.16678	up	-	GO:0006355;GO:0005634;GO:000367	BP:regulation of transcription, DNA-templated;CC:nucleus;MF:DNA binding;	------	------	------	------	ENOG410YG0P	K:Transcription	XP_037461271.1	NAC domain-containing protein 43-like isoform X1 [Triticum dicoccoides]	sp|Q84WP6|NAC43_ARATH;	NAC domain-containing protein 43 OS=Arabidopsis thaliana OX=3702 GN=NAC043 PE=2 SV=2;	PF02365.17	NAM	No apical meristem
TraesCS4A02G242700	NAC	0.25	1	2	up	-	GO:0006355;GO:000367	BP:regulation of transcription, DNA-templated;MF:DNA binding;	------	------	------	------	ENOG410YEYV	S:Function unknown	VAH94430.1	unnamed protein product [Triticum turgidum subsp. durum]	sp|O04017|NAC98_ARATH;	Protein CUP-SHAPED COTYLEDON 2 OS=Arabidopsis thaliana OX=3702 GN=NAC098 PE=1 SV=1;	PF02365.17	NAM	No apical meristem
TraesCS7D02G365200	NAC	0.19	0.686667	1.85361	up	-	GO:0006355;GO:0005634;GO:0000976;GO:000367	BP:regulation of transcription, DNA-templated;CC:nucleus;MF:transcription regulatory region sequence-specific DNA binding;MF:DNA binding;	------	------	------	------	ENOG41116DK	S:Function unknown	XP_020164992.1	NAC domain-containing protein 75 [Aegilops tauschii subsp. strangulata]	sp|Q9M0F8|NAC75_ARATH;	NAC domain-containing protein 75 OS=Arabidopsis thaliana OX=3702 GN=NAC075 PE=2 SV=1;	PF02365.17	NAM	No apical meristem
TraesCS7A02G357500	NAC	0.153333	0.546667	1.83399	up	-	GO:0006355;GO:0005634;GO:0000976;GO:000367	BP:regulation of transcription, DNA-templated;CC:nucleus;MF:transcription regulatory region sequence-specific DNA binding;MF:DNA binding;	------	------	------	------	ENOG41116DK	S:Function unknown	KAF7096751.1	hypothetical protein CFC21_098648 [Triticum aestivum]	sp|Q9M0F8|NAC75_ARATH;	NAC domain-containing protein 75 OS=Arabidopsis thaliana OX=3702 GN=NAC075 PE=2 SV=1;	PF02365.17	NAM	No apical meristem
TraesCS4A02G131000	NAC	1.13667	4.03667	1.82835	up	-	GO:0006355;GO:0005634;GO:000367	BP:regulation of transcription, DNA-templated;CC:nucleus;MF:DNA binding;	------	------	------	------	ENOG410YB53	K:Transcription	XP_037420775.1	NAC domain-containing protein 1-like [Triticum dicoccoides]	sp|D2SMN4|NAMB1_HORVS;	NAC transcription factor NAM-B1 OS=Hordeum vulgare subsp. spontaneum OX=77009 GN=NAM-B1 PE=4 SV=1;	PF02365.17	NAM	No apical meristem
TraesCS4D02G175700	NAC	0.426667	1.47667	1.79116	up	-	GO:0006355;GO:0005634;GO:000367	BP:regulation of transcription, DNA-templated;CC:nucleus;MF:DNA binding;	------	------	------	------	ENOG410YB53	K:Transcription	XP_020162550.1	NAC domain-containing protein 2 [Aegilops tauschii subsp. strangulata]	sp|D2SMN4|NAMB1_HORVS;	NAC transcription factor NAM-B1 OS=Hordeum vulgare subsp. spontaneum OX=77009 GN=NAM-B1 PE=4 SV=1;	PF02365.17	NAM	No apical meristem
TraesCS3D02G078900	NAC	0.326667	1.04333	1.67531	up	NAC transcription factor [Source:UniProtKB/TrEMBL;Acc:D7R5Z9]	GO:0006355;GO:0005634;GO:000367	BP:regulation of transcription, DNA-templated;CC:nucleus;MF:DNA binding;	------	------	------	------	ENOG410YB53;ENOG4110680	K:Transcription;S:Function unknown	ADG85701.1	NAC transcription factor [Triticum aestivum]	sp|A0SPJ6|NAMB2_TRITD;	NAC transcription factor NAM-B2 OS=Triticum turgidum subsp. durum OX=4567 GN=NAM-B2 PE=2 SV=1;	PF02365.17	NAM	No apical meristem
TraesCS4A02G421300	NAC	0.896667	2.69333	1.58675	up	-	GO:0006355;GO:0005634;GO:000367	BP:regulation of transcription, DNA-templated;CC:nucleus;MF:DNA binding;	------	------	------	------	ENOG410YG0P	K:Transcription	KAF7045964.1	hypothetical protein CFC21_055025 [Triticum aestivum]	sp|Q84WP6|NAC43_ARATH;	NAC domain-containing protein 43 OS=Arabidopsis thaliana OX=3702 GN=NAC043 PE=2 SV=2;	PF02365.17	NAM	No apical meristem
TraesCS4B02G173600	NAC	1.52	4.08333	1.42568	up	-	GO:0006355;GO:0005634;GO:000367	BP:regulation of transcription, DNA-templated;CC:nucleus;MF:DNA binding;	------	------	------	------	ENOG410YB53	K:Transcription	XP_037430574.1	NAC domain-containing protein 2-like [Triticum dicoccoides]	sp|D2SMN4|NAMB1_HORVS;	NAC transcription factor NAM-B1 OS=Hordeum vulgare subsp. spontaneum OX=77009 GN=NAM-B1 PE=4 SV=1;	PF02365.17	NAM	No apical meristem
TraesCS7A02G068000	NAC	1.18	2.93667	1.31539	up	-	GO:0006355;GO:0005634;GO:000367	BP:regulation of transcription, DNA-templated;CC:nucleus;MF:DNA binding;	------	------	------	------	ENOG410YG0P	K:Transcription	KAF7093226.1	hypothetical protein CFC21_095650 [Triticum aestivum]	sp|Q84WP6|NAC43_ARATH;	NAC domain-containing protein 43 OS=Arabidopsis thaliana OX=3702 GN=NAC043 PE=2 SV=2;	PF02365.17	NAM	No apical meristem
TraesCS3B02G126200	NAC	1.94667	4.20667	1.11167	up	-	GO:0006355;GO:000367	BP:regulation of transcription, DNA-templated;MF:DNA binding;	------	------	------	------	ENOG410YHV1	S:Function unknown	KAF7028240.1	hypothetical protein CFC21_040196 [Triticum aestivum]	sp|Q9M0F8|NAC75_ARATH;	NAC domain-containing protein 75 OS=Arabidopsis thaliana OX=3702 GN=NAC075 PE=2 SV=1;	PF02365.17	NAM	No apical meristem
TraesCS2A02G459700	NAC	2.06333	1.01	-1.03062	down	-	GO:0006355;GO:0005634;GO:000367	BP:regulation of transcription, DNA-templated;CC:nucleus;MF:DNA binding;	------	------	------	------	ENOG41108W6;ENOG410Y97V;ENOG4111BC1	S:Function unknown;K:Transcription;K:Transcription	KAF7003660.1	hypothetical protein CFC21_018953 [Triticum aestivum]	sp|Q75HE5|NAC2_ORYSJ;	NAC domain-containing protein 2 OS=Oryza sativa subsp. japonica OX=39947 GN=NAC002 PE=1 SV=1;	PF02365.17	NAM	No apical meristem
TraesCS3D02G333100	NAC	11.25	4.69	-1.26227	down	-	GO:0006355;GO:0005634;GO:000367	BP:regulation of transcription, DNA-templated;CC:nucleus;MF:DNA binding;	------	------	------	------	ENOG410Y97V	K:Transcription	XP_020181126.1	NAC domain-containing protein 68 [Aegilops tauschii subsp. strangulata]	sp|Q52QH4|NAC68_ORYSJ;	NAC domain-containing protein 68 OS=Oryza sativa subsp. japonica OX=39947 GN=NAC068 PE=2 SV=1;	PF02365.17	NAM	No apical meristem
TraesCS2A02G101900	NAC	13.3733	3.3	-2.01882	down	-	GO:0006355;GO:0005634;GO:000367	BP:regulation of transcription, DNA-templated;CC:nucleus;MF:DNA binding;	------	------	------	------	ENOG4110680	S:Function unknown	XP_037475734.1	NAC domain-containing protein 2-like [Triticum dicoccoides]	sp|D2SMN4|NAMB1_HORVS;	NAC transcription factor NAM-B1 OS=Hordeum vulgare subsp. spontaneum OX=77009 GN=NAM-B1 PE=4 SV=1;	PF02365.17	NAM	No apical meristem
TraesCS3A02G339600	NAC	14.94	3.47667	-2.1034	down	NAC transcription factor 4 [Source:UniProtKB/TrEMBL;Acc:D9HQE0]	GO:0006355;GO:0005634;GO:000367	BP:regulation of transcription, DNA-templated;CC:nucleus;MF:DNA binding;	------	------	------	------	ENOG410Y97V	K:Transcription	XP_037407086.1	NAC domain-containing protein 68-like [Triticum dicoccoides]	sp|Q52QH4|NAC68_ORYSJ;	NAC domain-containing protein 68 OS=Oryza sativa subsp. japonica OX=39947 GN=NAC068 PE=2 SV=1;	PF02365.17	NAM	No apical meristem
TraesCS3B02G371200	NAC	6.94	1.61333	-2.10489	down	-	GO:0006355;GO:0005634;GO:000367	BP:regulation of transcription, DNA-templated;CC:nucleus;MF:DNA binding;	------	------	------	------	ENOG410Y97V	K:Transcription	CDM84716.1	unnamed protein product [Triticum aestivum]	sp|Q52QH4|NAC68_ORYSJ;	NAC domain-containing protein 68 OS=Oryza sativa subsp. japonica OX=39947 GN=NAC068 PE=2 SV=1;	PF02365.17	NAM	No apical meristem
TraesCS2D02G214100	NAC	0.323333	0.033333	-3.278	down	-	GO:0006355;GO:0048731;GO:0005634;GO:000367	BP:regulation of transcription, DNA-templated;BP:system development;CC:nucleus;MF:DNA binding;	------	------	------	------	ENOG4111FG3	K:Transcription	XP_020200235.1	NAC transcription factor NAM-B2 [Aegilops tauschii subsp. strangulata]	sp|A0SPJ6|NAMB2_TRITD;	NAC transcription factor NAM-B2 OS=Triticum turgidum subsp. durum OX=4567 GN=NAM-B2 PE=2 SV=1;	PF02365.17	NAM	No apical meristem
TraesCS7D02G210400	SBP	0.71	1.91667	1.43271	up	-	GO:0005634;GO:0016021;GO:0046872;GO:000367	CC:nucleus;CC:integral component of membrane;MF:metal ion binding;MF:DNA binding;	------	------	------	------	ENOG4111YFE	S:Function unknown	KAF7107946.1	hypothetical protein CFC21_108518 [Triticum aestivum]	sp|Q9LGU7|SPL1_ORYSJ;	Squamosa promoter-binding-like protein 1 OS=Oryza sativa subsp. japonica OX=39947 GN=SPL1 PE=2 SV=1;	PF03110.16	SBP	SBP domain
TraesCS7B02G402200	SBP	0.796667	1.98333	1.31588	up	-	GO:0005634;GO:0046872;GO:000367	CC:nucleus;MF:metal ion binding;MF:DNA binding;	------	------	------	------	ENOG41120IC	S:Function unknown	KAF7104307.1	hypothetical protein CFC21_105213 [Triticum aestivum]	sp|A2YFT9|SPL10_ORYSI;	Squamosa promoter-binding-like protein 10 OS=Oryza sativa subsp. indica OX=39946 GN=SPL10 PE=2 SV=1;	PF03110.16	SBP	SBP domain
TraesCS7A02G208000	SBP	2.05333	4.19333	1.03013	up	-	GO:0005634;GO:0016021;GO:0046872;GO:000367	CC:nucleus;CC:integral component of membrane;MF:metal ion binding;MF:DNA binding;	------	------	------	------	ENOG4111YFE	S:Function unknown	XP_037458727.1	squamosa promoter-binding-like protein 1 isoform X3 [Triticum dicoccoides]	sp|Q9LGU7|SPL1_ORYSJ;	Squamosa promoter-binding-like protein 1 OS=Oryza sativa subsp. japonica OX=39947 GN=SPL1 PE=2 SV=1;	PF03110.16	SBP	SBP domain
TraesCS6A02G110100	SBP	10.5167	5.13333	-1.03471	down	-	GO:0005634;GO:0046872;GO:000367	CC:nucleus;MF:metal ion binding;MF:DNA binding;	------	------	------	------	ENOG410YKP9	K:Transcription	XP_037445727.1	squamosa promoter-binding-like protein 3 [Triticum dicoccoides]	sp|A2X0Q6|SPL3_ORYSI;	Squamosa promoter-binding-like protein 3 OS=Oryza sativa subsp. indica OX=39946 GN=SPL3 PE=2 SV=1;	PF03110.16	SBP	SBP domain
TraesCS7D02G261500	SBP	0.573333	0.133333	-2.10434	down	-	GO:0005634;GO:0046872;GO:000367	CC:nucleus;MF:metal ion binding;MF:DNA binding;	------	------	------	------	ENOG410YD0Z	S:Function unknown	XP_020194874.1	squamosa promoter-binding-like protein 16 [Aegilops tauschii subsp. strangulata]	sp|Q49I57|TGA1B_MAIZE;	Teosinte glume architecture 1 OS=Zea mays OX=4577 GN=TGA1 PE=3 SV=1;	PF03110.16	SBP	SBP domain
TraesCS3D02G497300	SRS	7.01667	3.23	-1.11925	down	-	GO:0045893;GO:0005634;GO:000367	BP:positive regulation of transcription, DNA-templated;CC:nucleus;MF:DNA binding;	------	------	------	------	ENOG4111TEK	S:Function unknown	KAF7040321.1	hypothetical protein CFC21_050230 [Triticum aestivum]	sp|Q9FXH7|SRS7_ARATH;	Protein SHI RELATED SEQUENCE 7 OS=Arabidopsis thaliana OX=3702 GN=SRS7 PE=1 SV=1;	PF05142.14	DUF702	Domain of unknown function
TraesCS7B02G306300	SRS	1.46	0.64	-1.18982	down	-	GO:0045893;GO:0005634;GO:000367	BP:positive regulation of transcription, DNA-templated;CC:nucleus;MF:DNA binding;	------	------	------	------	ENOG410YDRX	S:Function unknown	KAF7103185.1	hypothetical protein CFC21_104202 [Triticum aestivum]	sp|Q9XGX0|SHI_ARATH;	Protein SHORT INTERNODES OS=Arabidopsis thaliana OX=3702 GN=SHI PE=1 SV=1;	PF05142.14	DUF702	Domain of unknown function
TraesCS1B02G363200	WRKY	0.226667	3.52667	3.95966	up	-	GO:0006355;GO:0005634;GO:0003700;GO:004356	BP:regulation of transcription, DNA-templated;CC:nucleus;MF:transcription factor activity, sequence-specific DNA binding;MF:sequence-specific DNA binding;	------	------	------	------	ENOG410YINN	K:Transcription	KAF6991256.1	hypothetical protein CFC21_008364 [Triticum aestivum]	sp|Q8VWQ4|WRK56_ARATH;	Probable WRKY transcription factor 56 OS=Arabidopsis thaliana OX=3702 GN=WRKY56 PE=1 SV=1;	PF03106.17	WRKY	WRKY DNA -binding domain
TraesCS3A02G280400	WRKY	0.146667	2.15333	3.87596	up	-	GO:0006355;GO:0005634;GO:0003700;GO:004356	BP:regulation of transcription, DNA-templated;CC:nucleus;MF:transcription factor activity, sequence-specific DNA binding;MF:sequence-specific DNA binding;	------	------	------	------	ENOG410YINN	K:Transcription	KAF7023597.1	hypothetical protein CFC21_036082 [Triticum aestivum]	sp|Q9FFS3|WRK24_ARATH;	Probable WRKY transcription factor 24 OS=Arabidopsis thaliana OX=3702 GN=WRKY24 PE=1 SV=1;	PF03106.17	WRKY	WRKY DNA -binding domain
TraesCS1D02G351600	WRKY	0.346667	3.30333	3.2523	up	-	GO:0006355;GO:0005634;GO:0003700;GO:004356	BP:regulation of transcription, DNA-templated;CC:nucleus;MF:transcription factor activity, sequence-specific DNA binding;MF:sequence-specific DNA binding;	------	------	------	------	ENOG410YINN	K:Transcription	XP_020160818.1	probable WRKY transcription factor 75 [Aegilops tauschii subsp. strangulata]	sp|Q8VWQ4|WRK56_ARATH;	Probable WRKY transcription factor 56 OS=Arabidopsis thaliana OX=3702 GN=WRKY56 PE=1 SV=1;	PF03106.17	WRKY	WRKY DNA -binding domain
TraesCS1A02G348600	WRKY	0.36	3.06333	3.08903	up	-	GO:0006355;GO:0005634;GO:0003700;GO:004356	BP:regulation of transcription, DNA-templated;CC:nucleus;MF:transcription factor activity, sequence-specific DNA binding;MF:sequence-specific DNA binding;	------	------	------	------	ENOG410YINN	K:Transcription	XP_037423343.1	probable WRKY transcription factor 24 [Triticum dicoccoides]	sp|Q9FFS3|WRK24_ARATH;	Probable WRKY transcription factor 24 OS=Arabidopsis thaliana OX=3702 GN=WRKY24 PE=1 SV=1;	PF03106.17	WRKY	WRKY DNA -binding domain
TraesCS3D02G280200	WRKY	0.26	1.78333	2.77799	up	-	GO:0006355;GO:0005634;GO:0003700;GO:004356	BP:regulation of transcription, DNA-templated;CC:nucleus;MF:transcription factor activity, sequence-specific DNA binding;MF:sequence-specific DNA binding;	------	------	------	------	ENOG410YINN	K:Transcription	XP_020179077.1	probable WRKY transcription factor 56 [Aegilops tauschii subsp. strangulata]	sp|Q9FFS3|WRK24_ARATH;	Probable WRKY transcription factor 24 OS=Arabidopsis thaliana OX=3702 GN=WRKY24 PE=1 SV=1;	PF03106.17	WRKY	WRKY DNA -binding domain
TraesCS2B02G209200	WRKY	0.256667	1.00333	1.96683	up	-	GO:0006355;GO:0050896;GO:0016021;GO:0005634;GO:0043565;GO:0003700;GO:000367	BP:regulation of transcription, DNA-templated;BP:response to stimulus;CC:integral component of membrane;CC:nucleus;MF:sequence-specific DNA binding;MF:transcription factor activity, sequence-specific DNA binding;MF:DNA binding;	------	------	------	------	ENOG4110477;ENOG410YBRT	K:Transcription;	XP_037484326.1	probable WRKY transcription factor 3 [Triticum dicoccoides]	sp|Q9XI90|WRKY4_ARATH;	Probable WRKY transcription factor 4 OS=Arabidopsis thaliana OX=3702 GN=WRKY4 PE=1 SV=2;	PF03106.17	WRKY	WRKY DNA -binding domain
TraesCS2A02G182700	WRKY	0.45	1.25333	1.47777	up	-	GO:0006355;GO:0005634;GO:0016021;GO:0003700;GO:004356	BP:regulation of transcription, DNA-templated;CC:nucleus;CC:integral component of membrane;MF:transcription factor activity, sequence-specific DNA binding;MF:sequence-specific DNA binding;	------	------	------	------	ENOG4110477;ENOG410YBRT	K:Transcription;	KAF6983400.1	hypothetical protein CFC21_001595 [Triticum aestivum]	sp|Q9ZQ70|WRKY3_ARATH;	Probable WRKY transcription factor 3 OS=Arabidopsis thaliana OX=3702 GN=WRKY3 PE=2 SV=1;	PF03106.17	WRKY	WRKY DNA -binding domain
TraesCS1A02G298600	WRKY	1.10667	2.9	1.38983	up	-	GO:0006355;GO:0005634;GO:0003700;GO:0043565;GO:000367	BP:regulation of transcription, DNA-templated;CC:nucleus;MF:transcription factor activity, sequence-specific DNA binding;MF:sequence-specific DNA binding;MF:DNA binding;	K13424	WRKY33	map04016;map04626	MAPK signaling pathway - plant;Plant-pathogen interaction	ENOG410YHVA;ENOG4112BTF	K:Transcription;	VAH08442.1	unnamed protein product [Triticum turgidum subsp. durum]	sp|Q6IEQ7|WRK24_ORYSJ;	WRKY transcription factor WRKY24 OS=Oryza sativa subsp. japonica OX=39947 GN=WRKY24 PE=2 SV=1;	PF03106.17	WRKY	WRKY DNA -binding domain
TraesCS2D02G168600	WRKY	0.773333	1.93	1.31944	up	Transcription factor WRKY [Source:UniProtKB/TrEMBL;Acc:A7X9Y5]	GO:0006355;GO:0050896;GO:0005634;GO:0043565;GO:0003700;GO:0000976;GO:000367	BP:regulation of transcription, DNA-templated;BP:response to stimulus;CC:nucleus;MF:sequence-specific DNA binding;MF:transcription factor activity, sequence-specific DNA binding;MF:transcription regulatory region sequence-specific DNA binding;MF:DNA binding;	------	------	------	------	ENOG410YZU1	K:Transcription	SPT16904.1	unnamed protein product [Triticum aestivum]	sp|Q8H0Y8|WRK41_ARATH;	Probable WRKY transcription factor 41 OS=Arabidopsis thaliana OX=3702 GN=WRKY41 PE=1 SV=2;	PF03106.17	WRKY	WRKY DNA -binding domain
TraesCS1B02G308200	WRKY	0.606667	1.48667	1.2931	up	-	GO:0006355;GO:0005634;GO:0003700;GO:004356	BP:regulation of transcription, DNA-templated;CC:nucleus;MF:transcription factor activity, sequence-specific DNA binding;MF:sequence-specific DNA binding;	K13424	WRKY33	map04016;map04626	MAPK signaling pathway - plant;Plant-pathogen interaction	ENOG410YHVA;ENOG4112BTF	K:Transcription;	KAF6990642.1	hypothetical protein CFC21_007813 [Triticum aestivum]	sp|Q6IEQ7|WRK24_ORYSJ;	WRKY transcription factor WRKY24 OS=Oryza sativa subsp. japonica OX=39947 GN=WRKY24 PE=2 SV=1;	PF03106.17	WRKY	WRKY DNA -binding domain
TraesCS3A02G242500	WRKY	0.73	1.61	1.14109	up	-	GO:0006355;GO:0050896;GO:0005634;GO:0043565;GO:0003700;GO:000367	BP:regulation of transcription, DNA-templated;BP:response to stimulus;CC:nucleus;MF:sequence-specific DNA binding;MF:transcription factor activity, sequence-specific DNA binding;MF:DNA binding;	------	------	------	------	ENOG410ZMEJ;ENOG410YSII	K:Transcription;	XP_037406142.1	WRKY transcription factor 71-like [Triticum dicoccoides]	sp|Q93WV4|WRK71_ARATH;	WRKY transcription factor 71 OS=Arabidopsis thaliana OX=3702 GN=WRKY71 PE=2 SV=1;	PF03106.17	WRKY	WRKY DNA -binding domain
TraesCS3B02G270500	WRKY	0.98	2.08333	1.08804	up	-	GO:0006355;GO:0050896;GO:0005634;GO:0043565;GO:0003700;GO:000367	BP:regulation of transcription, DNA-templated;BP:response to stimulus;CC:nucleus;MF:sequence-specific DNA binding;MF:transcription factor activity, sequence-specific DNA binding;MF:DNA binding;	------	------	------	------	ENOG410ZMEJ;ENOG410YSII	K:Transcription;	APD15302.1	WRKY-like protein [Triticum turgidum]	sp|Q93WV4|WRK71_ARATH;	WRKY transcription factor 71 OS=Arabidopsis thaliana OX=3702 GN=WRKY71 PE=2 SV=1;	PF03106.17	WRKY	WRKY DNA -binding domain
TraesCS5D02G390800	WRKY	6.89	3.01667	-1.19155	down	-	GO:0006355;GO:0005634;GO:0003700;GO:004356	BP:regulation of transcription, DNA-templated;CC:nucleus;MF:transcription factor activity, sequence-specific DNA binding;MF:sequence-specific DNA binding;	------	------	------	------	ENOG410YDPN	K:Transcription	XP_020179772.1	protein WRKY1 [Aegilops tauschii subsp. strangulata]	sp|Q32SG4|WRKY1_MAIZE;	Protein WRKY1 OS=Zea mays OX=4577 PE=1 SV=1;	PF03106.17;PF10533.11	WRKY;Plant_zn_clust	WRKY DNA -binding domain;Plant zinc cluster domain

## Sheet: Table S5-5
Table S5-5. Expression and functional annotation of TFs in Ardito_LP vs. CK.
Gene_id	TF family	Ardito_CK	Ardito_LP	Log2(FC)	Regulation	Gene_description	GO_id	GO_term	KO_id	KO_name	Pathway_id	Pathway_definition	EggNOG_id	EggNOG_Functional Categories	NR_hit-name	NR_description	Swiss-Prot_hit-name	Swiss-Prot_description	Pfam_id	Domain	Domain description
TraesCS1D02G230900	AP2	0.296667	3.15333	3.40996	up	Ethylene-responsive transcription factor RAP2-3 [Source:Projected from Arabidopsis thaliana (AT3G16770) UniProtKB/Swiss-Prot;Acc:P42736]	GO:0006355;GO:0006351;GO:0005634;GO:0003700;GO:000367	BP:regulation of transcription, DNA-templated;BP:transcription, DNA-templated;CC:nucleus;MF:transcription factor activity, sequence-specific DNA binding;MF:DNA binding;	K09286	EREBP	------	------	ENOG410ZNB5	S:Function unknown	XP_020148477.1	ethylene-responsive transcription factor RAP2-3 [Aegilops tauschii subsp. strangulata]	sp|P42736|RAP23_ARATH;	Ethylene-responsive transcription factor RAP2-3 OS=Arabidopsis thaliana OX=3702 GN=RAP2-3 PE=1 SV=2;	PF00847.22	AP2	AP2 domain
TraesCS1B02G243200	AP2	0.196667	1.76	3.16175	up	Ethylene-responsive transcription factor RAP2-3 [Source:Projected from Arabidopsis thaliana (AT3G16770) UniProtKB/Swiss-Prot;Acc:P42736]	GO:0006355;GO:0006351;GO:0005634;GO:0003700;GO:000367	BP:regulation of transcription, DNA-templated;BP:transcription, DNA-templated;CC:nucleus;MF:transcription factor activity, sequence-specific DNA binding;MF:DNA binding;	K09286	EREBP	------	------	ENOG410ZNB5	S:Function unknown	APR63145.1	AP2/EREBP-like protein [Triticum aestivum]	sp|P42736|RAP23_ARATH;	Ethylene-responsive transcription factor RAP2-3 OS=Arabidopsis thaliana OX=3702 GN=RAP2-3 PE=1 SV=2;	PF00847.22	AP2	AP2 domain
TraesCS5A02G310700	AP2	0.623333	2.10333	1.7546	up	-	GO:0006355;GO:0006351;GO:0005634;GO:0003700;GO:000367	BP:regulation of transcription, DNA-templated;BP:transcription, DNA-templated;CC:nucleus;MF:transcription factor activity, sequence-specific DNA binding;MF:DNA binding;	------	------	------	------	ENOG411074H	K:Transcription	VAI20025.1	unnamed protein product [Triticum turgidum subsp. durum]	sp|Q3T5N4|DRE1B_ORYSJ;	Dehydration-responsive element-binding protein 1B OS=Oryza sativa subsp. japonica OX=39947 GN=DREB1B PE=2 SV=1;	PF00847.22	AP2	AP2 domain
TraesCS7B02G162100	AP2	13.1967	5.64333	-1.22555	down	-	GO:0006426;GO:0006355;GO:0006351;GO:0006004;GO:0005737;GO:0005634;GO:0016021;GO:0004820;GO:0003700;GO:0016740;GO:0003677;GO:000552	BP:glycyl-tRNA aminoacylation;BP:regulation of transcription, DNA-templated;BP:transcription, DNA-templated;BP:fucose metabolic process;CC:cytoplasm;CC:nucleus;CC:integral component of membrane;MF:glycine-tRNA ligase activity;MF:transcription factor activity, sequence-specific DNA binding;MF:transferase activity;MF:DNA binding;MF:ATP binding;	------	------	------	------	ENOG410YY7D;ENOG4111F2S;ENOG41108T3	K:Transcription;S:Function unknown;S:Function unknown	XP_037469401.1	ethylene-responsive transcription factor RAP2-6-like [Triticum dicoccoides]	sp|Q9FGF8|ABR1_ARATH;	Ethylene-responsive transcription factor ABR1 OS=Arabidopsis thaliana OX=3702 GN=ABR1 PE=2 SV=1;	PF00847.22	AP2	AP2 domain
TraesCS7A02G264100	AP2	8.50333	2.93667	-1.53385	down	Ethylene-responsive transcription factor ERF114 [Source:Projected from Arabidopsis thaliana (AT5G61890) UniProtKB/Swiss-Prot;Acc:Q9FH54]	GO:0006426;GO:0006355;GO:0006351;GO:0006004;GO:0005737;GO:0005634;GO:0016021;GO:0004820;GO:0003700;GO:0016740;GO:0003677;GO:000552	BP:glycyl-tRNA aminoacylation;BP:regulation of transcription, DNA-templated;BP:transcription, DNA-templated;BP:fucose metabolic process;CC:cytoplasm;CC:nucleus;CC:integral component of membrane;MF:glycine-tRNA ligase activity;MF:transcription factor activity, sequence-specific DNA binding;MF:transferase activity;MF:DNA binding;MF:ATP binding;	------	------	------	------	ENOG410YY7D;ENOG4111F2S;ENOG41108T3	K:Transcription;S:Function unknown;S:Function unknown	VAI74499.1	unnamed protein product [Triticum turgidum subsp. durum]	sp|Q9FGF8|ABR1_ARATH;	Ethylene-responsive transcription factor ABR1 OS=Arabidopsis thaliana OX=3702 GN=ABR1 PE=2 SV=1;	PF00847.22	AP2	AP2 domain
TraesCS7D02G463000	B3	3.60333	1.61333	-1.15929	down	Auxin response factor [Source:UniProtKB/TrEMBL;Acc:A0A1D6CQU2]	GO:0009734;GO:0009725;GO:0006355;GO:0006351;GO:0005634;GO:000367	BP:auxin-activated signaling pathway;BP:response to hormone;BP:regulation of transcription, DNA-templated;BP:transcription, DNA-templated;CC:nucleus;MF:DNA binding;	------	------	------	------	ENOG41108GW	K:Transcription	XP_020191290.1	auxin response factor 13 [Aegilops tauschii subsp. strangulata]	sp|Q7XSS9|ARFM_ORYSJ;	Auxin response factor 13 OS=Oryza sativa subsp. japonica OX=39947 GN=ARF13 PE=2 SV=2;	PF06507.15;PF02362.23	Auxin_resp;B3	Auxin response factor;B3 DNA binding domain
TraesCS7B02G085000	B3	1.98333	4.68667	1.24064	up	-	GO:0006355;GO:0006351;GO:0005634;GO:000367	BP:regulation of transcription, DNA-templated;BP:transcription, DNA-templated;CC:nucleus;MF:DNA binding;	------	------	------	------	ENOG4111SA1	K:Transcription	KAF7100297.1	hypothetical protein CFC21_101829 [Triticum aestivum]	sp|Q69V36|Y6944_ORYSJ;	B3 domain-containing protein Os06g0194400 OS=Oryza sativa subsp. japonica OX=39947 GN=Os06g0194400 PE=2 SV=1;	PF02362.23	B3	B3 DNA binding domain
TraesCS3A02G104400	bHLH	0.07	1.10667	3.98272	up	-	GO:004698	MF:protein dimerization activity;	------	------	------	------	ENOG410ZMUQ	S:Function unknown	XP_037409049.1	putative transcription factor bHLH041 [Triticum dicoccoides]	sp|Q9LTS4|BH041_ARATH;	Putative transcription factor bHLH041 OS=Arabidopsis thaliana OX=3702 GN=BHLH41 PE=3 SV=1;	PF00010.28	HLH	Helix-loop-helix DNA-binding domain
TraesCS3B02G122800	bHLH	0.033333	0.473333	3.82783	up	-	GO:004698	MF:protein dimerization activity;	------	------	------	------	ENOG410ZMUQ	S:Function unknown	KAF7028189.1	hypothetical protein CFC21_040154 [Triticum aestivum]	sp|Q9LTS4|BH041_ARATH;	Putative transcription factor bHLH041 OS=Arabidopsis thaliana OX=3702 GN=BHLH41 PE=3 SV=1;	PF00010.28	HLH	Helix-loop-helix DNA-binding domain
TraesCS3D02G106600	bHLH	0.09	1.11667	3.63313	up	-	GO:004698	MF:protein dimerization activity;	------	------	------	------	ENOG410ZMUQ	S:Function unknown	XP_020164742.1	putative transcription factor bHLH041 [Aegilops tauschii subsp. strangulata]	sp|Q9LTS4|BH041_ARATH;	Putative transcription factor bHLH041 OS=Arabidopsis thaliana OX=3702 GN=BHLH41 PE=3 SV=1;	PF00010.28	HLH	Helix-loop-helix DNA-binding domain
TraesCS4D02G302700	bHLH	1.86667	4.86	1.38049	up	-	GO:0006355;GO:0006357;GO:0005634;GO:0000978;GO:0046983;GO:000098	BP:regulation of transcription, DNA-templated;BP:regulation of transcription from RNA polymerase II promoter;CC:nucleus;MF:RNA polymerase II core promoter proximal region sequence-specific DNA binding;MF:protein dimerization activity;MF:RNA polymerase II transcription factor activity, sequence-specific DNA binding;	------	------	------	------	ENOG410YF8H	K:Transcription	XP_020153287.1	transcription factor bHLH96 [Aegilops tauschii subsp. strangulata]	sp|Q9C7T4|BH096_ARATH;	Transcription factor bHLH96 OS=Arabidopsis thaliana OX=3702 GN=BHLH96 PE=1 SV=1;	PF00010.28	HLH	Helix-loop-helix DNA-binding domain
TraesCS4D02G018800	bHLH	5.18667	2.43	-1.09385	down	-	GO:004698	MF:protein dimerization activity;	------	------	------	------	ENOG41108RP;ENOG41107E5	S:Function unknown;	KAF7016476.1	hypothetical protein CFC21_030081 [Triticum aestivum]	sp|Q9T072|BH025_ARATH;	Transcription factor bHLH25 OS=Arabidopsis thaliana OX=3702 GN=BHLH25 PE=2 SV=2;	PF00010.28	HLH	Helix-loop-helix DNA-binding domain
TraesCS1B02G100400	bHLH	1.41667	0.59	-1.26371	down	Helix-loop-helix DNA-binding domain containing protein [Source: Projected from Oryza sativa (Os05g0139100)]	GO:0006355;GO:0080113;GO:0005634;GO:0003700;GO:004698	BP:regulation of transcription, DNA-templated;BP:regulation of seed growth;CC:nucleus;MF:transcription factor activity, sequence-specific DNA binding;MF:protein dimerization activity;	K12126	PIF3	map04712;map04075	Circadian rhythm - plant;Plant hormone signal transduction	ENOG41107PA	S:Function unknown	XP_037453610.1	transcription factor APG-like isoform X2 [Triticum dicoccoides]	sp|Q0JNI9|PIL15_ORYSJ;	Transcription factor PHYTOCHROME INTERACTING FACTOR-LIKE 15 OS=Oryza sativa subsp. japonica OX=39947 GN=PIL15 PE=1 SV=2;	PF00010.28	HLH	Helix-loop-helix DNA-binding domain
TraesCS3A02G102900	bHLH	3.20667	1.29333	-1.30998	down	-	GO:004698	MF:protein dimerization activity;	------	------	------	------	ENOG410ZM5C	K:Transcription	EMS47100.1	Transcription factor bHLH51 [Triticum urartu]	sp|Q9XEF0|BH051_ARATH;	Transcription factor bHLH51 OS=Arabidopsis thaliana OX=3702 GN=BHLH51 PE=2 SV=1;	PF00010.28	HLH	Helix-loop-helix DNA-binding domain
TraesCS6A02G273000	bHLH	3.74667	1.03333	-1.8583	down	-	GO:0006355;GO:0005634;GO:004698	BP:regulation of transcription, DNA-templated;CC:nucleus;MF:protein dimerization activity;	------	------	------	------	ENOG410YGAM	K:Transcription	KAF7079967.1	hypothetical protein CFC21_084125 [Triticum aestivum]	sp|Q8GY61|BH063_ARATH;	Transcription factor bHLH63 OS=Arabidopsis thaliana OX=3702 GN=BHLH63 PE=1 SV=1;	PF00010.28	HLH	Helix-loop-helix DNA-binding domain
TraesCS5A02G049600	bHLH	3.89667	0.97	-2.00618	down	-	GO:0005634;GO:004698	CC:nucleus;MF:protein dimerization activity;	K16189	PIF4	map04075	Plant hormone signal transduction	ENOG410YAGK	K:Transcription	KAF7056859.1	hypothetical protein CFC21_064232 [Triticum aestivum]	sp|Q10CH5|PIL13_ORYSJ;	Transcription factor PHYTOCHROME INTERACTING FACTOR-LIKE 13 OS=Oryza sativa subsp. japonica OX=39947 GN=PIL13 PE=1 SV=1;	PF00010.28	HLH	Helix-loop-helix DNA-binding domain
TraesCS3D02G293500	bZIP	4.28333	9.46667	1.14412	up	-	GO:0006355;GO:0045893;GO:0005634;GO:0003700;GO:000367	BP:regulation of transcription, DNA-templated;BP:positive regulation of transcription, DNA-templated;CC:nucleus;MF:transcription factor activity, sequence-specific DNA binding;MF:DNA binding;	------	------	------	------	ENOG410YEVN	K:Transcription	XP_020195077.1	basic leucine zipper 6 [Aegilops tauschii subsp. strangulata]	sp|Q5JMK6|BZP06_ORYSJ;	Basic leucine zipper 6 OS=Oryza sativa subsp. japonica OX=39947 GN=BZIP06 PE=2 SV=1;	PF00170.23;PF07716.17;PF03131.19	bZIP_1;bZIP_2;bZIP_Maf	bZIP transcription factor;Basic region leucine zipper;bZIP Maf transcription factor
TraesCS5D02G068800	bZIP	47.55	16.3067	-1.54398	down	-	GO:0006355;GO:0005634;GO:000370	BP:regulation of transcription, DNA-templated;CC:nucleus;MF:transcription factor activity, sequence-specific DNA binding;	------	------	------	------	ENOG410YRZY	S:Function unknown	KAF7070568.1	hypothetical protein CFC21_076076 [Triticum aestivum]	sp|Q99090|CPRF2_PETCR;	Light-inducible protein CPRF2 OS=Petroselinum crispum OX=4043 GN=CPRF2 PE=2 SV=2;	PF12498.10;PF00170.23;PF07716.17	bZIP_C;bZIP_1;bZIP_2	Basic leucine-zipper C terminal;bZIP transcription factor;Basic region leucine zipper
TraesCS5B02G059200	bZIP	55.91	17.7633	-1.6542	down	-	GO:0006355;GO:0005634;GO:000370	BP:regulation of transcription, DNA-templated;CC:nucleus;MF:transcription factor activity, sequence-specific DNA binding;	------	------	------	------	ENOG410YRZY	S:Function unknown	XP_037439421.1	light-inducible protein CPRF2-like [Triticum dicoccoides]	sp|Q99090|CPRF2_PETCR;	Light-inducible protein CPRF2 OS=Petroselinum crispum OX=4043 GN=CPRF2 PE=2 SV=2;	PF12498.10;PF00170.23;PF07716.17	bZIP_C;bZIP_1;bZIP_2	Basic leucine-zipper C terminal;bZIP transcription factor;Basic region leucine zipper
TraesCS3D02G109300	C3H	103.903	45.52	-1.19067	down	-	GO:0010150;GO:0009867;GO:0005634;GO:0046872;GO:000367	BP:leaf senescence;BP:jasmonic acid mediated signaling pathway;CC:nucleus;MF:metal ion binding;MF:DNA binding;	------	------	------	------	ENOG410XR0Z	S:Function unknown	XP_020192020.1	zinc finger CCCH domain-containing protein 2 [Aegilops tauschii subsp. strangulata]	sp|Q9FU27|C3H2_ORYSJ;	Zinc finger CCCH domain-containing protein 2 OS=Oryza sativa subsp. japonica OX=39947 GN=Os01g0192000 PE=2 SV=1;	PF00642.26;PF18044.3;PF18345.3	zf-CCCH;zf-CCCH_4;zf_CCCH_4	Zinc finger C-x8-C-x5-C-x3-H type;CCCH-type zinc finger;Zinc finger domain
TraesCS3A02G107200	C3H	44.8933	17.3867	-1.36852	down	TZF1 [Source:UniProtKB/TrEMBL;Acc:A0A0G3YJW9]	GO:0010150;GO:0009867;GO:0005634;GO:0046872;GO:000367	BP:leaf senescence;BP:jasmonic acid mediated signaling pathway;CC:nucleus;MF:metal ion binding;MF:DNA binding;	------	------	------	------	ENOG410XR0Z	S:Function unknown	XP_037404463.1	zinc finger CCCH domain-containing protein 2-like [Triticum dicoccoides]	sp|Q9FU27|C3H2_ORYSJ;	Zinc finger CCCH domain-containing protein 2 OS=Oryza sativa subsp. japonica OX=39947 GN=Os01g0192000 PE=2 SV=1;	PF00642.26;PF18044.3;PF18345.3	zf-CCCH;zf-CCCH_4;zf_CCCH_4	Zinc finger C-x8-C-x5-C-x3-H type;CCCH-type zinc finger;Zinc finger domain
TraesCS6D02G140900	CO-like	8.68333	3.21333	-1.43418	down	-	GO:0005634;GO:0008270;GO:000551	CC:nucleus;MF:zinc ion binding;MF:protein binding;	------	------	------	------	COG5641	K:Transcription	XP_020163882.1	zinc finger protein HD1 isoform X1 [Aegilops tauschii subsp. strangulata]	sp|O82117|CO3_ORYSJ;	Zinc finger protein CO3 OS=Oryza sativa subsp. japonica OX=39947 GN=CO3 PE=2 SV=1;	PF06203.16;PF00643.26	CCT;zf-B_box	CCT motif;B-box zinc finger
TraesCS6D02G199200	DBB	12.8367	6.05333	-1.08447	down	-	GO:0006355;GO:0009640;GO:0005634;GO:0005622;GO:000827	BP:regulation of transcription, DNA-templated;BP:photomorphogenesis;CC:nucleus;CC:intracellular;MF:zinc ion binding;	------	------	------	------	ENOG410YBMW	S:Function unknown	XP_020173021.1	B-box zinc finger protein 25 [Aegilops tauschii subsp. strangulata]	sp|Q9SID1|BBX25_ARATH;	B-box zinc finger protein 25 OS=Arabidopsis thaliana OX=3702 GN=BBX25 PE=1 SV=2;	PF00643.26	zf-B_box	B-box zinc finger
TraesCS6B02G246500	DBB	8.16	2.64667	-1.62439	down	-	GO:0006355;GO:0009640;GO:0005634;GO:0005622;GO:000827	BP:regulation of transcription, DNA-templated;BP:photomorphogenesis;CC:nucleus;CC:intracellular;MF:zinc ion binding;	------	------	------	------	ENOG410YBMW	S:Function unknown	XP_037454224.1	B-box zinc finger protein 25-like [Triticum dicoccoides]	sp|Q9SID1|BBX25_ARATH;	B-box zinc finger protein 25 OS=Arabidopsis thaliana OX=3702 GN=BBX25 PE=1 SV=2;	PF00643.26	zf-B_box	B-box zinc finger
TraesCS6A02G216400	DBB	4.23	1.21	-1.80565	down	-	GO:0006355;GO:0009640;GO:0005634;GO:000827	BP:regulation of transcription, DNA-templated;BP:photomorphogenesis;CC:nucleus;MF:zinc ion binding;	------	------	------	------	ENOG410YBMW	S:Function unknown	XP_037447336.1	B-box zinc finger protein 25-like [Triticum dicoccoides]	sp|Q9SID1|BBX25_ARATH;	B-box zinc finger protein 25 OS=Arabidopsis thaliana OX=3702 GN=BBX25 PE=1 SV=2;	PF00643.26	zf-B_box	B-box zinc finger
TraesCS3B02G210300	Dof	2.76	1.15333	-1.25886	down	-	GO:0006355;GO:0005634;GO:0003700;GO:000367	BP:regulation of transcription, DNA-templated;CC:nucleus;MF:transcription factor activity, sequence-specific DNA binding;MF:DNA binding;	------	------	------	------	ENOG410YN7N	S:Function unknown	KAF7029217.1	hypothetical protein CFC21_041022 [Triticum aestivum]	sp|Q93ZL5|CDF2_ARATH;	Cyclic dof factor 2 OS=Arabidopsis thaliana OX=3702 GN=CDF2 PE=1 SV=2;	PF02701.17	zf-Dof	Dof domain, zinc finger
TraesCS3A02G180600	Dof	2.07333	0.823333	-1.3324	down	-	GO:0006355;GO:0005634;GO:0003700;GO:000367	BP:regulation of transcription, DNA-templated;CC:nucleus;MF:transcription factor activity, sequence-specific DNA binding;MF:DNA binding;	------	------	------	------	ENOG410YN7N	S:Function unknown	XP_037405270.1	cyclic dof factor 2-like [Triticum dicoccoides]	sp|Q93ZL5|CDF2_ARATH;	Cyclic dof factor 2 OS=Arabidopsis thaliana OX=3702 GN=CDF2 PE=1 SV=2;	PF02701.17	zf-Dof	Dof domain, zinc finger
TraesCS3D02G185500	Dof	1.73333	0.61	-1.50667	down	-	GO:0006355;GO:0005634;GO:0003700;GO:000367	BP:regulation of transcription, DNA-templated;CC:nucleus;MF:transcription factor activity, sequence-specific DNA binding;MF:DNA binding;	------	------	------	------	ENOG410YN7N	S:Function unknown	XP_020189771.1	cyclic dof factor 2 [Aegilops tauschii subsp. strangulata]	sp|Q93ZL5|CDF2_ARATH;	Cyclic dof factor 2 OS=Arabidopsis thaliana OX=3702 GN=CDF2 PE=1 SV=2;	PF02701.17	zf-Dof	Dof domain, zinc finger
TraesCS6D02G291000	E2F/DP	0.76	1.95	1.3594	up	-	GO:0006355;GO:0006357;GO:0007049;GO:0005634;GO:0005667;GO:0003700;GO:0003677;GO:000097	BP:regulation of transcription, DNA-templated;BP:regulation of transcription from RNA polymerase II promoter;BP:cell cycle;CC:nucleus;CC:transcription factor complex;MF:transcription factor activity, sequence-specific DNA binding;MF:DNA binding;MF:RNA polymerase II core promoter proximal region sequence-specific DNA binding;	------	------	------	------	ENOG4111IGY	K:Transcription	XP_020187635.1	E2F transcription factor-like E2FE isoform X1 [Aegilops tauschii subsp. strangulata]	sp|Q8LSZ4|E2FE_ARATH;	E2F transcription factor-like E2FE OS=Arabidopsis thaliana OX=3702 GN=E2FE PE=1 SV=1;	PF02319.22	E2F_TDP	E2F/DP family winged-helix DNA-binding domain
TraesCS3D02G390000	EIL	2.83333	1.01333	-1.48339	down	-	GO:0009873;GO:0005634;GO:0003700;GO:000367	BP:ethylene-activated signaling pathway;CC:nucleus;MF:transcription factor activity, sequence-specific DNA binding;MF:DNA binding;	K14514	EIN3	map04016;map04075	MAPK signaling pathway - plant;Plant hormone signal transduction	ENOG41107DU	S:Function unknown	XP_020197833.1	ETHYLENE INSENSITIVE 3-like 5 protein [Aegilops tauschii subsp. strangulata]	sp|Q9FJQ5|EIL5_ARATH;	ETHYLENE INSENSITIVE 3-like 5 protein OS=Arabidopsis thaliana OX=3702 GN=EIL5 PE=2 SV=1;	PF04873.15;PF11001.10	EIN3;DUF2841	Ethylene insensitive 3;Protein of unknown function
TraesCS3B02G428000	EIL	3.53333	1.05667	-1.74151	down	-	GO:0006355;GO:0009873;GO:0005634;GO:000370	BP:regulation of transcription, DNA-templated;BP:ethylene-activated signaling pathway;CC:nucleus;MF:transcription factor activity, sequence-specific DNA binding;	K14514	EIN3	map04016;map04075	MAPK signaling pathway - plant;Plant hormone signal transduction	ENOG41107DU	S:Function unknown	XP_037418157.1	ETHYLENE INSENSITIVE 3-like 5 protein [Triticum dicoccoides]	sp|Q9FJQ5|EIL5_ARATH;	ETHYLENE INSENSITIVE 3-like 5 protein OS=Arabidopsis thaliana OX=3702 GN=EIL5 PE=2 SV=1;	PF04873.15;PF11001.10	EIN3;DUF2841	Ethylene insensitive 3;Protein of unknown function
TraesCS4D02G340700	HB-other	0.086667	0.563333	2.70043	up	-	GO:0006355;GO:0005634;GO:000367	BP:regulation of transcription, DNA-templated;CC:nucleus;MF:DNA binding;	------	------	------	------	ENOG410XPMQ	K:Transcription	KAF7055980.1	hypothetical protein CFC21_063444 [Triticum aestivum]	sp|Q38897|BEL1_ARATH;	Homeobox protein BEL1 homolog OS=Arabidopsis thaliana OX=3702 GN=BEL1 PE=1 SV=2;	PF07526.13;PF05920.13;PF00046.31	POX;Homeobox_KN;Homeodomain	Associated with HOX;Homeobox KN domain;Homeodomain
TraesCS7D02G388600	M_type	9.50667	3.45333	-1.46095	down	-	GO:0045944;GO:0006351;GO:0005634;GO:0003677;GO:0000987;GO:0046983;GO:0000982;GO:000098	BP:positive regulation of transcription from RNA polymerase II promoter;BP:transcription, DNA-templated;CC:nucleus;MF:DNA binding;MF:core promoter proximal region sequence-specific DNA binding;MF:protein dimerization activity;MF:transcription factor activity, RNA polymerase II core promoter proximal region sequence-specific binding;MF:RNA polymerase II transcription factor activity, sequence-spec…	------	------	------	------	ENOG411154A;COG5068	S:Function unknown;K:Transcription	KAF7110219.1	hypothetical protein CFC21_110358 [Triticum aestivum]	------	------	PF00319.20	SRF-TF	SRF-type transcription factor
TraesCS3A02G434900	M_type	6.21	2.20333	-1.49491	down	-	GO:0006357;GO:0045944;GO:0006351;GO:0005634;GO:0003677;GO:0046983;GO:0000978;GO:0000981;GO:000097	BP:regulation of transcription from RNA polymerase II promoter;BP:positive regulation of transcription from RNA polymerase II promoter;BP:transcription, DNA-templated;CC:nucleus;MF:DNA binding;MF:protein dimerization activity;MF:RNA polymerase II core promoter proximal region sequence-specific DNA binding;MF:RNA polymerase II transcription factor activity, sequence-specific DNA binding;MF:RNA pol…	------	------	------	------	COG5068	K:Transcription	XP_037407998.1	MADS-box transcription factor 51-like [Triticum dicoccoides]	sp|Q9XJ61|MAD51_ORYSJ;	MADS-box transcription factor 51 OS=Oryza sativa subsp. japonica OX=39947 GN=MADS51 PE=2 SV=1;	PF00319.20	SRF-TF	SRF-type transcription factor
TraesCS7B02G188000	MYB	51.9533	22.0933	-1.23361	down	-	GO:0005634;GO:000367	CC:nucleus;MF:DNA binding;	K12133	LHY	map04712	Circadian rhythm - plant	ENOG4111X77	K:Transcription	KAF7101644.1	hypothetical protein CFC21_102912 [Triticum aestivum]	sp|A0A0G3VTN5|LHY_PETHY;	Protein LATE ELONGATED HYPOCOTYL OS=Petunia hybrida OX=4102 GN=LHY PE=2 SV=1;	PF00249.33	Myb_DNA-binding	Myb-like DNA-binding domain
TraesCS7D02G295400	MYB	64.0867	23.81	-1.42846	down	-	GO:0005634;GO:000367	CC:nucleus;MF:DNA binding;	K12133	LHY	map04712	Circadian rhythm - plant	ENOG4111X77	K:Transcription	KAF7109084.1	hypothetical protein CFC21_109398 [Triticum aestivum]	sp|A0A0G3VTN5|LHY_PETHY;	Protein LATE ELONGATED HYPOCOTYL OS=Petunia hybrida OX=4102 GN=LHY PE=2 SV=1;	PF00249.33	Myb_DNA-binding	Myb-like DNA-binding domain
TraesCS6B02G349200	MYB	0.703333	3.18333	2.17826	up	-	GO:000367	MF:DNA binding;	K09422	MYBP	------	------	COG5147	K:Transcription	KAF7085993.1	hypothetical protein CFC21_089353 [Triticum aestivum]	sp|Q9S9Z2|MYB93_ARATH;	Transcription factor MYB93 OS=Arabidopsis thaliana OX=3702 GN=MYB93 PE=1 SV=1;	PF00249.33;PF13921.8	Myb_DNA-binding;Myb_DNA-bind_6	Myb-like DNA-binding domain;Myb-like DNA-binding domain
TraesCS3A02G254500	MYB	0.493333	1.72333	1.80457	up	-	------	------	K09422	MYBP	------	------	COG5147	K:Transcription	KAF7023276.1	hypothetical protein CFC21_035832 [Triticum aestivum]	sp|P20027|MYB3_HORVU;	Myb-related protein Hv33 OS=Hordeum vulgare OX=4513 GN=MYB2 PE=2 SV=3;	PF00249.33;PF13921.8	Myb_DNA-binding;Myb_DNA-bind_6	Myb-like DNA-binding domain;Myb-like DNA-binding domain
TraesCS2D02G444200	MYB	0.293333	1.01	1.78374	up	-	GO:000367	MF:DNA binding;	K09422	MYBP	------	------	COG5147	K:Transcription	KAF7018252.1	hypothetical protein CFC21_031553 [Triticum aestivum]	sp|P20024|MYB1_MAIZE;	Myb-related protein Zm1 OS=Zea mays OX=4577 PE=2 SV=1;	PF00249.33;PF13921.8	Myb_DNA-binding;Myb_DNA-bind_6	Myb-like DNA-binding domain;Myb-like DNA-binding domain
TraesCS1B02G279400	MYB	0.78	2.52333	1.69378	up	-	GO:000367	MF:DNA binding;	K09422	MYBP	------	------	COG5147	K:Transcription	KAF6990315.1	hypothetical protein CFC21_007518 [Triticum aestivum]	sp|P81393|MYB08_ANTMA;	Myb-related protein 308 OS=Antirrhinum majus OX=4151 GN=MYB308 PE=2 SV=1;	PF00249.33;PF13921.8	Myb_DNA-binding;Myb_DNA-bind_6	Myb-like DNA-binding domain;Myb-like DNA-binding domain
TraesCS6A02G319000	MYB	2.54333	7.38	1.5369	up	-	GO:000367	MF:DNA binding;	K09422	MYBP	------	------	COG5147	K:Transcription	XP_037448371.1	transcription factor MYB93-like [Triticum dicoccoides]	sp|Q9S9Z2|MYB93_ARATH;	Transcription factor MYB93 OS=Arabidopsis thaliana OX=3702 GN=MYB93 PE=1 SV=1;	PF00249.33;PF13921.8	Myb_DNA-binding;Myb_DNA-bind_6	Myb-like DNA-binding domain;Myb-like DNA-binding domain
TraesCS6A02G318900	MYB	0.84	2.43333	1.53447	up	-	GO:000367	MF:DNA binding;	K09422	MYBP	------	------	COG5147	K:Transcription	XP_037448373.1	transcription factor MYB93-like [Triticum dicoccoides]	sp|Q9S9Z2|MYB93_ARATH;	Transcription factor MYB93 OS=Arabidopsis thaliana OX=3702 GN=MYB93 PE=1 SV=1;	PF00249.33;PF13921.8	Myb_DNA-binding;Myb_DNA-bind_6	Myb-like DNA-binding domain;Myb-like DNA-binding domain
TraesCS5D02G095600	MYB	4.85333	13.4667	1.47235	up	-	GO:0003700;GO:004356	MF:transcription factor activity, sequence-specific DNA binding;MF:sequence-specific DNA binding;	K09422	MYBP	------	------	COG5147	K:Transcription	XP_040244959.1	myb-related protein MYBAS2 [Aegilops tauschii subsp. strangulata]	sp|Q4JL76|MYBA2_ORYSJ;	Myb-related protein MYBAS2 OS=Oryza sativa subsp. japonica OX=39947 GN=MYBAS2 PE=2 SV=1;	PF00249.33;PF13921.8	Myb_DNA-binding;Myb_DNA-bind_6	Myb-like DNA-binding domain;Myb-like DNA-binding domain
TraesCS2B02G177900	MYB	1.06	2.89	1.44701	up	-	------	------	K09422	MYBP	------	------	COG5147	K:Transcription	KAF7007362.1	hypothetical protein CFC21_022310 [Triticum aestivum]	sp|Q8LPH6|MYB86_ARATH;	Transcription factor MYB86 OS=Arabidopsis thaliana OX=3702 GN=MYB86 PE=2 SV=1;	PF00249.33;PF13921.8	Myb_DNA-binding;Myb_DNA-bind_6	Myb-like DNA-binding domain;Myb-like DNA-binding domain
TraesCS2D02G158200	MYB	1.48	3.78667	1.35533	up	-	GO:000367	MF:DNA binding;	K09422	MYBP	------	------	COG5147	K:Transcription	KAF7014600.1	hypothetical protein CFC21_028581 [Triticum aestivum]	sp|Q8LPH6|MYB86_ARATH;	Transcription factor MYB86 OS=Arabidopsis thaliana OX=3702 GN=MYB86 PE=2 SV=1;	PF00249.33;PF13921.8	Myb_DNA-binding;Myb_DNA-bind_6	Myb-like DNA-binding domain;Myb-like DNA-binding domain
TraesCS7A02G553800	MYB	16.5467	7.11333	-1.21794	down	-	GO:0005634;GO:000367	CC:nucleus;MF:DNA binding;	------	------	------	------	ENOG4111HV1	K:Transcription	XP_037460342.1	protein LHY-like isoform X1 [Triticum dicoccoides]	sp|F4K5X6|RVE2_ARATH;	Protein REVEILLE 2 OS=Arabidopsis thaliana OX=3702 GN=RVE2 PE=1 SV=1;	PF00249.33;PF13921.8	Myb_DNA-binding;Myb_DNA-bind_6	Myb-like DNA-binding domain;Myb-like DNA-binding domain
TraesCS7D02G032700	MYB	5.49333	2.32333	-1.24149	down	-	GO:0009744;GO:0009751;GO:0045893;GO:0009739;GO:0005737;GO:0005634;GO:0003700;GO:0003677;GO:004280	BP:response to sucrose;BP:response to salicylic acid;BP:positive regulation of transcription, DNA-templated;BP:response to gibberellin;CC:cytoplasm;CC:nucleus;MF:transcription factor activity, sequence-specific DNA binding;MF:DNA binding;MF:protein homodimerization activity;	------	------	------	------	COG5269;ENOG410YG84	K:Transcription;	XP_020147245.1	transcription factor MYBS1 [Aegilops tauschii subsp. strangulata]	sp|B8A9B2|MYBS1_ORYSI;	Transcription factor MYBS1 OS=Oryza sativa subsp. indica OX=39946 GN=MYBS1 PE=3 SV=1;	PF00249.33;PF13921.8	Myb_DNA-binding;Myb_DNA-bind_6	Myb-like DNA-binding domain;Myb-like DNA-binding domain
TraesCS6A02G261100	MYB	1.97667	0.616667	-1.68051	down	-	GO:0005634;GO:000367	CC:nucleus;MF:DNA binding;	------	------	------	------	ENOG4111X77	K:Transcription	XP_037447811.1	protein REVEILLE 1-like isoform X2 [Triticum dicoccoides]	sp|F4KGY6|RVE1_ARATH;	Protein REVEILLE 1 OS=Arabidopsis thaliana OX=3702 GN=RVE1 PE=1 SV=1;	PF00249.33;PF13921.8	Myb_DNA-binding;Myb_DNA-bind_6	Myb-like DNA-binding domain;Myb-like DNA-binding domain
TraesCS7B02G478200	MYB	13.11	5.62333	-1.22117	down	-	GO:0005634;GO:000367	CC:nucleus;MF:DNA binding;	------	------	------	------	ENOG4111HV1	K:Transcription	KAF7105202.1	hypothetical protein CFC21_106034 [Triticum aestivum]	sp|F4K5X6|RVE2_ARATH;	Protein REVEILLE 2 OS=Arabidopsis thaliana OX=3702 GN=RVE2 PE=1 SV=1;	PF00249.33;PF13921.8;PF15963.7	Myb_DNA-binding;Myb_DNA-bind_6;Myb_DNA-bind_7	Myb-like DNA-binding domain;Myb-like DNA-binding domain;Myb DNA-binding like
TraesCS7D02G540700	MYB	12.79	5.26	-1.28188	down	-	GO:0005634;GO:000367	CC:nucleus;MF:DNA binding;	------	------	------	------	ENOG4111HV1	K:Transcription	XP_020180978.1	protein LHY isoform X1 [Aegilops tauschii subsp. strangulata]	sp|F4K5X6|RVE2_ARATH;	Protein REVEILLE 2 OS=Arabidopsis thaliana OX=3702 GN=RVE2 PE=1 SV=1;	PF00249.33;PF13921.8;PF15963.7	Myb_DNA-binding;Myb_DNA-bind_6;Myb_DNA-bind_7	Myb-like DNA-binding domain;Myb-like DNA-binding domain;Myb DNA-binding like
TraesCS6D02G239800	MYB	14.38	5.85667	-1.29591	down	-	GO:0005634;GO:000367	CC:nucleus;MF:DNA binding;	------	------	------	------	ENOG4111HV1	K:Transcription	XP_020182046.1	protein REVEILLE 6 isoform X1 [Aegilops tauschii subsp. strangulata]	sp|Q8H0W3|RVE6_ARATH;	Protein REVEILLE 6 OS=Arabidopsis thaliana OX=3702 GN=RVE6 PE=2 SV=1;	PF00249.33;PF15963.7	Myb_DNA-binding;Myb_DNA-bind_7	Myb-like DNA-binding domain;Myb DNA-binding like
TraesCS7D02G314000	NAC	0.106667	0.76	2.83289	up	-	GO:0006355;GO:0005634;GO:000367	BP:regulation of transcription, DNA-templated;CC:nucleus;MF:DNA binding;	------	------	------	------	ENOG410YG0P	K:Transcription	XP_040253183.1	NAC domain-containing protein 43 isoform X1 [Aegilops tauschii subsp. strangulata]	sp|Q84WP6|NAC43_ARATH;	NAC domain-containing protein 43 OS=Arabidopsis thaliana OX=3702 GN=NAC043 PE=2 SV=2;	PF02365.17	NAM	No apical meristem
TraesCS7A02G317100	NAC	0.17	1.01667	2.58024	up	-	GO:0006355;GO:0005634;GO:000367	BP:regulation of transcription, DNA-templated;CC:nucleus;MF:DNA binding;	------	------	------	------	ENOG410YG0P	K:Transcription	XP_037461271.1	NAC domain-containing protein 43-like isoform X1 [Triticum dicoccoides]	sp|Q84WP6|NAC43_ARATH;	NAC domain-containing protein 43 OS=Arabidopsis thaliana OX=3702 GN=NAC043 PE=2 SV=2;	PF02365.17	NAM	No apical meristem
TraesCS7D02G062100	NAC	0.69	2.17333	1.65524	up	-	GO:0006355;GO:0005634;GO:000367	BP:regulation of transcription, DNA-templated;CC:nucleus;MF:DNA binding;	------	------	------	------	ENOG410YG0P	K:Transcription	KAF7106246.1	hypothetical protein CFC21_106990 [Triticum aestivum]	sp|Q84WP6|NAC43_ARATH;	NAC domain-containing protein 43 OS=Arabidopsis thaliana OX=3702 GN=NAC043 PE=2 SV=2;	PF02365.17	NAM	No apical meristem
TraesCS2A02G101900	NAC	13.3733	6.22333	-1.1036	down	-	GO:0006355;GO:0005634;GO:000367	BP:regulation of transcription, DNA-templated;CC:nucleus;MF:DNA binding;	------	------	------	------	ENOG4110680	S:Function unknown	XP_037475734.1	NAC domain-containing protein 2-like [Triticum dicoccoides]	sp|D2SMN4|NAMB1_HORVS;	NAC transcription factor NAM-B1 OS=Hordeum vulgare subsp. spontaneum OX=77009 GN=NAM-B1 PE=4 SV=1;	PF02365.17	NAM	No apical meristem
TraesCS3B02G439600	NAC	34.5567	15.9867	-1.11209	down	NAC transcription factor 6B [Source:UniProtKB/TrEMBL;Acc:D7R600]	GO:1901002;GO:0006355;GO:0048364;GO:0045893;GO:1900150;GO:0009409;GO:1902584;GO:0005634;GO:0043565;GO:000367	BP:positive regulation of response to salt stress;BP:regulation of transcription, DNA-templated;BP:root development;BP:positive regulation of transcription, DNA-templated;BP:regulation of defense response to fungus;BP:response to cold;BP:positive regulation of response to water deprivation;CC:nucleus;MF:sequence-specific DNA binding;MF:DNA binding;	------	------	------	------	ENOG410YE96	S:Function unknown	XP_037415204.1	NAC domain-containing protein 48-like [Triticum dicoccoides]	sp|Q7F2L3|NAC48_ORYSJ;	NAC domain-containing protein 48 OS=Oryza sativa subsp. japonica OX=39947 GN=NAC048 PE=1 SV=1;	PF02365.17	NAM	No apical meristem
TraesCS3B02G371200	NAC	6.94	2.63667	-1.39622	down	-	GO:0006355;GO:0005634;GO:000367	BP:regulation of transcription, DNA-templated;CC:nucleus;MF:DNA binding;	------	------	------	------	ENOG410Y97V	K:Transcription	CDM84716.1	unnamed protein product [Triticum aestivum]	sp|Q52QH4|NAC68_ORYSJ;	NAC domain-containing protein 68 OS=Oryza sativa subsp. japonica OX=39947 GN=NAC068 PE=2 SV=1;	PF02365.17	NAM	No apical meristem
TraesCS3A02G339600	NAC	14.94	5.24333	-1.51062	down	NAC transcription factor 4 [Source:UniProtKB/TrEMBL;Acc:D9HQE0]	GO:0006355;GO:0005634;GO:000367	BP:regulation of transcription, DNA-templated;CC:nucleus;MF:DNA binding;	------	------	------	------	ENOG410Y97V	K:Transcription	XP_037407086.1	NAC domain-containing protein 68-like [Triticum dicoccoides]	sp|Q52QH4|NAC68_ORYSJ;	NAC domain-containing protein 68 OS=Oryza sativa subsp. japonica OX=39947 GN=NAC068 PE=2 SV=1;	PF02365.17	NAM	No apical meristem
TraesCS1B02G363200	WRKY	0.226667	1.23667	2.44781	up	-	GO:0006355;GO:0005634;GO:0003700;GO:004356	BP:regulation of transcription, DNA-templated;CC:nucleus;MF:transcription factor activity, sequence-specific DNA binding;MF:sequence-specific DNA binding;	------	------	------	------	ENOG410YINN	K:Transcription	KAF6991256.1	hypothetical protein CFC21_008364 [Triticum aestivum]	sp|Q8VWQ4|WRK56_ARATH;	Probable WRKY transcription factor 56 OS=Arabidopsis thaliana OX=3702 GN=WRKY56 PE=1 SV=1;	PF03106.17	WRKY	WRKY DNA -binding domain
TraesCS2D02G168600	WRKY	0.773333	2.95	1.93155	up	Transcription factor WRKY [Source:UniProtKB/TrEMBL;Acc:A7X9Y5]	GO:0006355;GO:0050896;GO:0005634;GO:0043565;GO:0003700;GO:0000976;GO:000367	BP:regulation of transcription, DNA-templated;BP:response to stimulus;CC:nucleus;MF:sequence-specific DNA binding;MF:transcription factor activity, sequence-specific DNA binding;MF:transcription regulatory region sequence-specific DNA binding;MF:DNA binding;	------	------	------	------	ENOG410YZU1	K:Transcription	SPT16904.1	unnamed protein product [Triticum aestivum]	sp|Q8H0Y8|WRK41_ARATH;	Probable WRKY transcription factor 41 OS=Arabidopsis thaliana OX=3702 GN=WRKY41 PE=1 SV=2;	PF03106.17	WRKY	WRKY DNA -binding domain
TraesCS1B02G308200	WRKY	0.606667	2.25	1.89095	up	-	GO:0006355;GO:0005634;GO:0003700;GO:004356	BP:regulation of transcription, DNA-templated;CC:nucleus;MF:transcription factor activity, sequence-specific DNA binding;MF:sequence-specific DNA binding;	K13424	WRKY33	map04016;map04626	MAPK signaling pathway - plant;Plant-pathogen interaction	ENOG410YHVA;ENOG4112BTF	K:Transcription;	KAF6990642.1	hypothetical protein CFC21_007813 [Triticum aestivum]	sp|Q6IEQ7|WRK24_ORYSJ;	WRKY transcription factor WRKY24 OS=Oryza sativa subsp. japonica OX=39947 GN=WRKY24 PE=2 SV=1;	PF03106.17	WRKY	WRKY DNA -binding domain
TraesCS1A02G298600	WRKY	1.10667	3.57	1.6897	up	-	GO:0006355;GO:0005634;GO:0003700;GO:0043565;GO:000367	BP:regulation of transcription, DNA-templated;CC:nucleus;MF:transcription factor activity, sequence-specific DNA binding;MF:sequence-specific DNA binding;MF:DNA binding;	K13424	WRKY33	map04016;map04626	MAPK signaling pathway - plant;Plant-pathogen interaction	ENOG410YHVA;ENOG4112BTF	K:Transcription;	VAH08442.1	unnamed protein product [Triticum turgidum subsp. durum]	sp|Q6IEQ7|WRK24_ORYSJ;	WRKY transcription factor WRKY24 OS=Oryza sativa subsp. japonica OX=39947 GN=WRKY24 PE=2 SV=1;	PF03106.17	WRKY	WRKY DNA -binding domain
TraesCS7D02G092600	WRKY	0.883333	0.21	-2.07257	down	-	GO:0006355;GO:0005634;GO:0003700;GO:004356	BP:regulation of transcription, DNA-templated;CC:nucleus;MF:transcription factor activity, sequence-specific DNA binding;MF:sequence-specific DNA binding;	------	------	------	------	ENOG410YE20	K:Transcription	KAF7106592.1	hypothetical protein CFC21_107309 [Triticum aestivum]	sp|Q8VWV6|WRK61_ARATH;	Probable WRKY transcription factor 61 OS=Arabidopsis thaliana OX=3702 GN=WRKY61 PE=2 SV=1;	PF03106.17	WRKY	WRKY DNA -binding domain

## Sheet: Table S5-6
Table S5-6. Expression and functional annotation of TFs in Ardito_Al vs. LP.
Gene_id	TF family	Ardito_Al	Ardito_LP	Log2(FC)	Regulation	Gene_description	GO_id	GO_term	KO_id	KO_name	Pathway_id	Pathway_definition	EggNOG_id	EggNOG_Functional Categories	NR_hit-name	NR_description	Swiss-Prot_hit-name	Swiss-Prot_description	Pfam_id	Domain	Domain description
TraesCS4B02G304500	bHLH	2.75667	6.39333	-1.21364	down	-	GO:0006355;GO:0006357;GO:0005634;GO:0000978;GO:0046983;GO:000098	BP:regulation of transcription, DNA-templated;BP:regulation of transcription from RNA polymerase II promoter;CC:nucleus;MF:RNA polymerase II core promoter proximal region sequence-specific DNA binding;MF:protein dimerization activity;MF:RNA polymerase II transcription factor activity, sequence-specific DNA binding;	------	------	------	------	ENOG410YF8H	K:Transcription	KAF7050666.1	hypothetical protein CFC21_059000 [Triticum aestivum]	sp|Q9C7T4|BH096_ARATH;	Transcription factor bHLH96 OS=Arabidopsis thaliana OX=3702 GN=BHLH96 PE=1 SV=1;	PF00010.28	HLH	Helix-loop-helix DNA-binding domain
TraesCS4D02G302700	bHLH	1.92667	4.86	-1.33485	down	-	GO:0006355;GO:0006357;GO:0005634;GO:0000978;GO:0046983;GO:000098	BP:regulation of transcription, DNA-templated;BP:regulation of transcription from RNA polymerase II promoter;CC:nucleus;MF:RNA polymerase II core promoter proximal region sequence-specific DNA binding;MF:protein dimerization activity;MF:RNA polymerase II transcription factor activity, sequence-specific DNA binding;	------	------	------	------	ENOG410YF8H	K:Transcription	XP_020153287.1	transcription factor bHLH96 [Aegilops tauschii subsp. strangulata]	sp|Q9C7T4|BH096_ARATH;	Transcription factor bHLH96 OS=Arabidopsis thaliana OX=3702 GN=BHLH96 PE=1 SV=1;	PF00010.28	HLH	Helix-loop-helix DNA-binding domain
TraesCS3D02G495700	bHLH	0.376667	2.15	-2.51298	down	-	GO:0006357;GO:0003700;GO:0046983;GO:000367	BP:regulation of transcription from RNA polymerase II promoter;MF:transcription factor activity, sequence-specific DNA binding;MF:protein dimerization activity;MF:DNA binding;	------	------	------	------	ENOG410YP85;ENOG410ZMQF	K:Transcription;	KAF7040296.1	hypothetical protein CFC21_050206 [Triticum aestivum]	sp|A2WZ60|IRO2_ORYSI;	Protein IRON-RELATED TRANSCRIPTION FACTOR 2 OS=Oryza sativa subsp. indica OX=39946 GN=IRO2 PE=3 SV=1;	PF00010.28	HLH	Helix-loop-helix DNA-binding domain
TraesCS3B02G550200	bHLH	0.256667	2.21333	-3.10825	down	-	GO:0006357;GO:0003700;GO:0046983;GO:000367	BP:regulation of transcription from RNA polymerase II promoter;MF:transcription factor activity, sequence-specific DNA binding;MF:protein dimerization activity;MF:DNA binding;	------	------	------	------	ENOG410YP85;ENOG410ZMQF	K:Transcription;	XP_037415896.1	protein IRON-RELATED TRANSCRIPTION FACTOR 2-like [Triticum dicoccoides]	sp|A2WZ60|IRO2_ORYSI;	Protein IRON-RELATED TRANSCRIPTION FACTOR 2 OS=Oryza sativa subsp. indica OX=39946 GN=IRO2 PE=3 SV=1;	PF00010.28	HLH	Helix-loop-helix DNA-binding domain
TraesCS3A02G489700	bHLH	0.18	1.70667	-3.24511	down	-	GO:0006357;GO:0003700;GO:0046983;GO:000367	BP:regulation of transcription from RNA polymerase II promoter;MF:transcription factor activity, sequence-specific DNA binding;MF:protein dimerization activity;MF:DNA binding;	------	------	------	------	ENOG410YP85;ENOG410ZMQF	K:Transcription;	KAF7026058.1	hypothetical protein CFC21_038196 [Triticum aestivum]	sp|A2WZ60|IRO2_ORYSI;	Protein IRON-RELATED TRANSCRIPTION FACTOR 2 OS=Oryza sativa subsp. indica OX=39946 GN=IRO2 PE=3 SV=1;	PF00010.28	HLH	Helix-loop-helix DNA-binding domain
TraesCS7D02G220300	CO-like	6.01667	2.25	1.41904	up	-	GO:0005634;GO:0008270;GO:000551	CC:nucleus;MF:zinc ion binding;MF:protein binding;	------	------	------	------	ENOG410YA5C	S:Function unknown	XP_020150634.1	zinc finger protein CONSTANS-LIKE 9 isoform X1 [Aegilops tauschii subsp. strangulata]	sp|Q9SSE5|COL9_ARATH;	Zinc finger protein CONSTANS-LIKE 9 OS=Arabidopsis thaliana OX=3702 GN=COL9 PE=1 SV=1;	PF06203.16;PF00643.26	CCT;zf-B_box	CCT motif;B-box zinc finger
TraesCS7A02G218600	CO-like	5.65333	2.35	1.26644	up	-	GO:0005634;GO:0008270;GO:000551	CC:nucleus;MF:zinc ion binding;MF:protein binding;	------	------	------	------	ENOG410YA5C	S:Function unknown	XP_037460315.1	zinc finger protein CONSTANS-LIKE 9-like isoform X1 [Triticum dicoccoides]	sp|Q9SSE5|COL9_ARATH;	Zinc finger protein CONSTANS-LIKE 9 OS=Arabidopsis thaliana OX=3702 GN=COL9 PE=1 SV=1;	PF06203.16;PF00643.26	CCT;zf-B_box	CCT motif;B-box zinc finger
TraesCS7B02G125500	DBB	3.89333	1.57333	1.30718	up	-	GO:0005634;GO:0005622;GO:000827	CC:nucleus;CC:intracellular;MF:zinc ion binding;	------	------	------	------	ENOG410YA5C	S:Function unknown	XP_037465784.1	zinc finger protein CONSTANS-LIKE 9-like isoform X1 [Triticum dicoccoides]	sp|Q9SSE5|COL9_ARATH;	Zinc finger protein CONSTANS-LIKE 9 OS=Arabidopsis thaliana OX=3702 GN=COL9 PE=1 SV=1;	PF00643.26	zf-B_box	B-box zinc finger
TraesCS2D02G100300	Dof	3.92	8.75333	-1.15898	down	-	GO:0006355;GO:0005634;GO:0003700;GO:000367	BP:regulation of transcription, DNA-templated;CC:nucleus;MF:transcription factor activity, sequence-specific DNA binding;MF:DNA binding;	------	------	------	------	ENOG410YN7N	S:Function unknown	KAF7013982.1	hypothetical protein CFC21_028019 [Triticum aestivum]	sp|Q93ZL5|CDF2_ARATH;	Cyclic dof factor 2 OS=Arabidopsis thaliana OX=3702 GN=CDF2 PE=1 SV=2;	PF02701.17	zf-Dof	Dof domain, zinc finger
TraesCS2A02G100800	Dof	2.70333	6.79	-1.32867	down	-	GO:0006355;GO:0005634;GO:0003700;GO:000367	BP:regulation of transcription, DNA-templated;CC:nucleus;MF:transcription factor activity, sequence-specific DNA binding;MF:DNA binding;	------	------	------	------	ENOG410YN7N	S:Function unknown	XP_020181996.1	cyclic dof factor 1 isoform X1 [Aegilops tauschii subsp. strangulata]	sp|Q93ZL5|CDF2_ARATH;	Cyclic dof factor 2 OS=Arabidopsis thaliana OX=3702 GN=CDF2 PE=1 SV=2;	PF02701.17	zf-Dof	Dof domain, zinc finger
TraesCS2D02G100200	HB-other	1.01	2.61	-1.36969	down	-	GO:0010311;GO:0048830;GO:0006355;GO:0005634;GO:0003700;GO:000367	BP:lateral root formation;BP:adventitious root development;BP:regulation of transcription, DNA-templated;CC:nucleus;MF:transcription factor activity, sequence-specific DNA binding;MF:DNA binding;	------	------	------	------	ENOG410YGSG	K:Transcription	KAF7013981.1	hypothetical protein CFC21_028018 [Triticum aestivum]	sp|A2XG77|WOX6_ORYSI;	WUSCHEL-related homeobox 6 OS=Oryza sativa subsp. indica OX=39946 GN=WOX6 PE=3 SV=1;	PF00046.31;PF12440.10	Homeodomain;MAGE_N	Homeodomain;Melanoma associated antigen family N terminal
TraesCS2D02G211400	HSF	0.493333	0.08	2.62449	up	-	GO:0006355;GO:0006357;GO:0034605;GO:0005634;GO:0043565;GO:0003700;GO:0003677;GO:000097	BP:regulation of transcription, DNA-templated;BP:regulation of transcription from RNA polymerase II promoter;BP:cellular response to heat;CC:nucleus;MF:sequence-specific DNA binding;MF:transcription factor activity, sequence-specific DNA binding;MF:DNA binding;MF:RNA polymerase II core promoter proximal region sequence-specific DNA binding;	K09419	HSFF	------	------	COG5169	K:Transcription	XP_020146599.1	heat stress transcription factor A-3 [Aegilops tauschii subsp. strangulata]	sp|Q6H6Q7|HSFA3_ORYSJ;	Heat stress transcription factor A-3 OS=Oryza sativa subsp. japonica OX=39947 GN=HSFA3 PE=2 SV=1;	PF00447.19	HSF_DNA-bind	HSF-type DNA-binding
TraesCS2B02G289800	LBD	4	11.6833	-1.54638	down	LOB domain-containing protein 41 [Source:Projected from Arabidopsis thaliana (AT3G02550) UniProtKB/Swiss-Prot;Acc:Q9M886]	GO:000727	BP:multicellular organism development;	------	------	------	------	ENOG410YBK4	S:Function unknown	KAE8805633.1	LOB domain-containing protein 40 [Hordeum vulgare]	sp|Q9M886|LBD41_ARATH;	LOB domain-containing protein 41 OS=Arabidopsis thaliana OX=3702 GN=LBD41 PE=2 SV=1;	PF03195.16	LOB	Lateral organ boundaries
TraesCS2A02G271300	LBD	3.67667	11.5067	-1.646	down	LOB domain-containing protein 41 [Source:Projected from Arabidopsis thaliana (AT3G02550) UniProtKB/Swiss-Prot;Acc:Q9M886]	GO:0006355;GO:0007275;GO:001046	BP:regulation of transcription, DNA-templated;BP:multicellular organism development;BP:regulation of gene expression;	------	------	------	------	ENOG410YBK4	S:Function unknown	XP_037477493.1	LOB domain-containing protein 40-like [Triticum dicoccoides]	sp|Q9M886|LBD41_ARATH;	LOB domain-containing protein 41 OS=Arabidopsis thaliana OX=3702 GN=LBD41 PE=2 SV=1;	PF03195.16	LOB	Lateral organ boundaries
TraesCS2D02G270100	LBD	2.21333	7.06	-1.67345	down	LOB domain-containing protein 41 [Source:Projected from Arabidopsis thaliana (AT3G02550) UniProtKB/Swiss-Prot;Acc:Q9M886]	GO:0006355;GO:0010468;GO:000727	BP:regulation of transcription, DNA-templated;BP:regulation of gene expression;BP:multicellular organism development;	------	------	------	------	ENOG410YBK4	S:Function unknown	XP_020176408.1	LOB domain-containing protein 40 [Aegilops tauschii subsp. strangulata]	sp|Q9M886|LBD41_ARATH;	LOB domain-containing protein 41 OS=Arabidopsis thaliana OX=3702 GN=LBD41 PE=2 SV=1;	PF03195.16	LOB	Lateral organ boundaries
[truncated: 14 more rows]

## Sheet: Table S5-7
Table S5-7. Expression and functional annotation of TFs in Al_Fielder vs. Ardito.
[truncated: 249 more rows]

## Sheet: Table S5-8
Table S5-8. Expression and functional annotation of TFs in LP_Fielder vs. Ardito.
[truncated: 204 more rows]

[truncated: 2 more sheets: Table S5-9, Table S5-10]
