# Supplementary material for: Exploration of the Commonalities and Specificities in Wheat Respond to Aluminum Toxicity and Low Phosphorus via Transcriptomics and Targeted Metabolomics Study
Source: Preprints.org preprint supplement (doi:10.20944/preprints202408.0689.v1), 2024-08-12
Supplement: Supplementary file 2 [file Table S1. Sequences of primers used in qRT-PCR analysis.xlsx]

## Sheet: Table S1
Table S1. Sequences of primers used in qRT-PCR analysis
Gene name/ID	Forward primer sequence 5'-3'	Reverse primer sequence 5'-3'
PAL (TraesCS6A02G222700)	TCAATGCCAATGTCACGCCGT	TTCCTTGGGTTGCAGCTCGAA
PAL (TraesCS6B02G258600)	AGGCGTTCAAGATAGCAGGCA	CGCAGAACACGGCAGAAATGA
4CL (TraesCS7A02G496200)	ACAAGGACGGTTGGCTGCATA	TCAGAGCCTTCAATCCGCACA
C4H (TraesCS7B02G299500)	ACAACTATGGCGACTTCATCCCC	CGCATCGGAGCTTGTTCTTGTC
CHS (TraesCS2B02G558400)	AGAACCCCAACATGTGCGCCTA	AAGACGAGGTGGGTGATCTTGG
CHS (TraesCS2B02G613100)	AATACGGCAACATGTCAAGCGC	ATTGATGGAGACGCTGTGGAGG
CHI (TraesCS5A02G146900)	AGGAGATCAAGGGGTCGCAGTA	CCTCCTTGCCTTCTGTCACGAA
CHI (TraesCS5B02G145800)	AGGAGATCAAGGGGTCGCAGTA	TCACGAACGATATCTCTGGCGC
F3H (TraesCS2B02G613300)	CACGGCCATTACTTGAGCAACG	CATCTTGCGGCGGTACATTTCC
FNS (TraesCS2D02G043500)	GCTGTCGAACACGTCCATCATC	CCTCCTCCTTGTGCCGAATCAT
