# Supplementary material for: Exploration of the Commonalities and Specificities in Wheat Respond to Aluminum Toxicity and Low Phosphorus via Transcriptomics and Targeted Metabolomics Study
Source: Preprints.org preprint supplement (doi:10.20944/preprints202408.0689.v1), 2024-08-12
Supplement: Supplementary file 3 [file Table S2. Statistical results from the sequencing data and comparison analysis .xlsx]

## Sheet: Table S2
Table S2. Statistical results from the sequencing data and comparison analysis
Sample	Total Clean Reads (M)	Total Clean Bases (G)	Clean reads Q30(%)	GC(%)	Total Mapped (%)	Uniquely mapped (%)
Fielder_CK_1	55.98	8.14	92.6	54.33	91.26	83.79
Fielder_CK_2	50.5	7.37	92.93	54.33	91.41	84.27
Fielder_CK_3	44.29	6.47	92.4	54.19	91.52	84.55
Fielder_Al_1	55.11	8.05	92.71	54.5	92.59	85.25
Fielder_Al_2	61.18	8.85	92.63	54.29	92.77	85.82
Fielder_Al_3	50.08	7.37	92	54.64	92.79	85.09
Fielder_LP_1	52.12	7.6	92.47	54.86	92.1	84.83
Fielder_LP_2	52.85	7.65	92.4	54.81	92.4	84.63
Fielder_LP_3	48.04	7.05	92.5	54.53	92.17	85.11
Ardito_CK_1	58	8.42	92.74	53.99	89.85	82.67
Ardito_CK_2	45.13	6.56	93.22	53.13	89.05	82.06
Ardito_CK_3	48.33	7.07	92.66	54.23	90.4	83.61
Ardito_Al_1	52.73	7.65	92.95	54.13	91.73	83.68
Ardito_Al_2	55.45	8.05	92.86	55.02	92.4	84.71
Ardito_Al_3	51.5	7.46	92.46	55.12	90.5	83.16
Ardito_LP_1	52.5	7.56	92.72	54.04	91.11	83.37
Ardito_LP_2	52.45	7.7	92.76	54.76	90.43	83.36
Ardito_LP_3	51.61	7.54	92.74	54.18	90.87	83.46
