# Supplementary material for: Exploration of the Commonalities and Specificities in Wheat Respond to Aluminum Toxicity and Low Phosphorus via Transcriptomics and Targeted Metabolomics Study
Source: Preprints.org preprint supplement (doi:10.20944/preprints202408.0689.v1), 2024-08-12
Supplement: Supplementary file 4 [file Table S4. GO annotations analysis of DEGs in eight comparisons response to Al and LP stresses (8 sheets contained).xlsx]

## Sheet: Table S4-1
Table S4-1 GO annotation analysis of DEGs in Fielder_Al vs. CK
GO ID	GO_Classify 1	GO_Classify 2	DEGs Unigene	All Unigene
GO:0002376	Biological process	Immune system process	10	10/2296
GO:0015976	Biological process	Carbon utilization	2	2/2296
GO:0065007	Biological process	Biological regulation	296	296/2296
GO:0008152	Biological process	Metabolic process	622	622/2296
GO:0051704	Biological process	Multi-organism process	34	34/2296
GO:0040011	Biological process	Locomotion	1	1/2296
GO:0022414	Biological process	Reproductive process	36	36/2296
GO:0000003	Biological process	Reproduction	1	1/2296
GO:0071840	Biological process	Cellular component organization or biogenesis	247	247/2296
GO:0009987	Biological process	Cellular process	785	785/2296
GO:0032502	Biological process	Developmental process	30	30/2296
GO:0032501	Biological process	Multicellular organismal process	22	22/2296
GO:0040007	Biological process	Growth	8	8/2296
GO:0048511	Biological process	Rhythmic process	4	4/2296
GO:0051179	Biological process	Localization	136	136/2296
GO:0098754	Biological process	Detoxification	8	8/2296
GO:0019740	Biological process	Nitrogen utilization	1	1/2296
GO:0050896	Biological process	Response to stimulus	418	418/2296
GO:0031974	Cellular component	Membrane-enclosed lumen	8	8/2296
GO:0032991	Cellular component	Protein-containing complex	324	324/2296
GO:0005623	Cellular component	Cell	5	5/2296
GO:0044425	Cellular component	Membrane part	549	549/2296
GO:0044421	Cellular component	Extracellular region part	8	8/2296
GO:0044422	Cellular component	Organelle part	361	361/2296
GO:0043226	Cellular component	Organelle	561	561/2296
GO:0016020	Cellular component	Membrane	288	288/2296
GO:0030054	Cellular component	Cell junction	99	99/2296
GO:0005576	Cellular component	Extracellular region	86	86/2296
GO:0044464	Cellular component	Cell part	818	818/2296
GO:0099080	Cellular component	Supramolecular complex	6	6/2296
GO:0045182	Molecular function	Translation regulator activity	1	1/2296
GO:0140110	Molecular function	Transcription regulator activity	113	113/2296
GO:0005198	Molecular function	Structural molecule activity	20	20/2296
GO:0044183	Molecular function	Protein folding chaperone	17	17/2296
GO:0016209	Molecular function	Antioxidant activity	37	37/2296
GO:0005215	Molecular function	Transporter activity	89	89/2296
GO:0090729	Molecular function	Toxin activity	2	2/2296
GO:0098772	Molecular function	Molecular function regulator	23	23/2296
GO:0005488	Molecular function	Binding	1334	1334/2296
GO:0045735	Molecular function	Nutrient reservoir activity	3	3/2296
GO:0031386	Molecular function	Protein tag	2	2/2296
GO:0060089	Molecular function	Molecular transducer activity	8	8/2296
GO:0003824	Molecular function	Catalytic activity	787	787/2296

## Sheet: Table S4-2
Table S4-2 GO annotation analysis of DEGs in Fielder_LP vs. CK
GO ID	GO_Classify 1	GO_Classify 2	DEGs Unigene	All Unigene
GO:0001906	Biological process	Cell killing	1	1/3029
GO:0002376	Biological process	Immune system process	14	14/3029
GO:0015976	Biological process	Carbon utilization	3	3/3029
GO:0065007	Biological process	Biological regulation	384	384/3029
GO:0008152	Biological process	Metabolic process	776	776/3029
GO:0051704	Biological process	Multi-organism process	40	40/3029
GO:0022414	Biological process	Reproductive process	31	31/3029
GO:0000003	Biological process	Reproduction	5	5/3029
GO:0008283	Biological process	Cell population proliferation	1	1/3029
GO:0071840	Biological process	Cellular component organization or biogenesis	359	359/3029
GO:0009987	Biological process	Cellular process	1007	1007/3029
GO:0032502	Biological process	Developmental process	37	37/3029
GO:0032501	Biological process	Multicellular organismal process	33	33/3029
GO:0040007	Biological process	Growth	3	3/3029
GO:0048511	Biological process	Rhythmic process	13	13/3029
GO:0051179	Biological process	Localization	244	244/3029
GO:0098754	Biological process	Detoxification	16	16/3029
GO:0023052	Biological process	Signaling	1	1/3029
GO:0019740	Biological process	Nitrogen utilization	1	1/3029
GO:0050896	Biological process	Response to stimulus	510	510/3029
GO:0031974	Cellular_component	Membrane-enclosed lumen	9	9/3029
GO:0032991	Cellular_component	Protein-containing complex	453	453/3029
GO:0005623	Cellular_component	Cell	7	7/3029
GO:0044425	Cellular_component	Membrane part	779	779/3029
GO:0044421	Cellular_component	Extracellular region part	14	14/3029
GO:0044422	Cellular_component	Organelle part	535	535/3029
GO:0043226	Cellular_component	Organelle	803	803/3029
GO:0016020	Cellular_component	Membrane	436	436/3029
GO:0030054	Cellular_component	Cell junction	136	136/3029
GO:0005576	Cellular_component	Extracellular region	207	207/3029
GO:0044464	Cellular_component	Cell part	1212	1212/3029
GO:0099080	Cellular_component	Supramolecular complex	8	8/3029
GO:0045182	Molecular_function	Translation regulator activity	1	1/3029
GO:0140110	Molecular_function	Transcription regulator activity	119	119/3029
GO:0005198	Molecular_function	Structural molecule activity	24	24/3029
GO:0044183	Molecular_function	Protein folding chaperone	22	22/3029
GO:0016209	Molecular_function	Antioxidant activity	75	75/3029
GO:0005215	Molecular_function	Transporter activity	170	170/3029
GO:0090729	Molecular_function	Toxin activity	3	3/3029
GO:0098772	Molecular_function	Molecular function regulator	38	38/3029
GO:0005488	Molecular_function	Binding	1705	1705/3029
GO:0045735	Molecular_function	Nutrient reservoir activity	16	16/3029
GO:0031386	Molecular_function	Protein tag	3	3/3029
GO:0060089	Molecular_function	Molecular transducer activity	14	14/3029
GO:0003824	Molecular_function	Catalytic activity	1012	1012/3029

## Sheet: Table S4-3
Table S4-3 GO annotation analysis of DEGs in Fielder_Al vs. LP
GO ID	GO_Classify 1	GO_Classify 2	DEGs Unigene	All Unigene
GO:0002376	Biological process	Immune system process	7	7/825
GO:0015976	Biological process	Carbon utilization	1	1/825
GO:0065007	Biological process	Biological regulation	112	112/825
GO:0008152	Biological process	Metabolic process	238	238/825
GO:0051704	Biological process	Multi-organism process	17	17/825
GO:0022414	Biological process	Reproductive process	11	11/825
GO:0000003	Biological process	Reproduction	5	5/825
GO:0071840	Biological process	Cellular component organization or biogenesis	40	40/825
GO:0009987	Biological process	Cellular process	248	248/825
GO:0032502	Biological process	Developmental process	17	17/825
GO:0032501	Biological process	Multicellular organismal process	13	13/825
GO:0048511	Biological process	Rhythmic process	6	6/825
GO:0051179	Biological process	Localization	44	44/825
GO:0098754	Biological process	Detoxification	4	4/825
GO:0019740	Biological process	Nitrogen utilization	1	1/825
GO:0050896	Biological process	Response to stimulus	137	137/825
GO:0031974	Cellular component	Membrane-enclosed lumen	2	2/825
GO:0032991	Cellular component	Protein-containing complex	22	22/825
GO:0005623	Cellular component	Cell	6	6/825
GO:0044425	Cellular component	Membrane part	176	176/825
GO:0044421	Cellular component	Extracellular region part	3	3/825
GO:0044422	Cellular component	Organelle part	39	39/825
GO:0043226	Cellular component	Organelle	105	105/825
GO:0016020	Cellular component	Membrane	88	88/825
GO:0030054	Cellular component	Cell junction	19	19/825
GO:0005576	Cellular component	Extracellular region	87	87/825
GO:0044464	Cellular component	Cell part	223	223/825
GO:0099080	Cellular component	Supramolecular complex	3	3/825
GO:0140110	Molecular function	Transcription regulator activity	44	44/825
GO:0005198	Molecular function	Structural molecule activity	2	2/825
GO:0044183	Molecular function	Protein folding chaperone	6	6/825
GO:0016209	Molecular function	Antioxidant activity	50	50/825
GO:0005215	Molecular function	Transporter activity	33	33/825
GO:0098772	Molecular function	Molecular function regulator	7	7/825
GO:0005488	Molecular function	Binding	371	371/825
GO:0045735	Molecular function	Nutrient reservoir activity	3	3/825
GO:0060089	Molecular function	Molecular transducer activity	1	1/825
GO:0003824	Molecular function	Catalytic activity	328	328/825

## Sheet: Table S4-4
Table S4-4 GO annotation analysis of DEGs in Ardito_Al vs. CK
GO ID	GO_Classify 1	GO_Classify 2	DEGs Unigene	All Unigene
GO:0001906	biological_process	Cell killing	2	2/4404
GO:0002376	biological_process	Immune system process	14	14/4404
GO:0015976	biological_process	Carbon utilization	1	1/4404
GO:0065007	biological_process	Biological regulation	505	505/4404
GO:0008152	biological_process	Metabolic process	1420	1420/4404
GO:0051704	biological_process	Multi-organism process	55	55/4404
GO:0022414	biological_process	Reproductive process	51	51/4404
GO:0000003	biological_process	Reproduction	15	15/4404
GO:0008283	biological_process	Cell population proliferation	2	2/4404
GO:0071840	biological_process	Cellular component organization or biogenesis	376	376/4404
GO:0009987	biological_process	Cellular process	1478	1478/4404
GO:0032502	biological_process	Developmental process	63	63/4404
GO:0032501	biological_process	Multicellular organismal process	49	49/4404
GO:0040007	biological_process	Growth	9	9/4404
GO:0048511	biological_process	Rhythmic process	16	16/4404
GO:0051179	biological_process	Localization	359	359/4404
GO:0098754	biological_process	Detoxification	26	26/4404
GO:0019740	biological_process	Nitrogen utilization	3	3/4404
GO:0050896	biological_process	Response to stimulus	565	565/4404
GO:0031974	cellular_component	Membrane-enclosed lumen	4	4/4404
GO:0032991	cellular_component	Protein-containing complex	398	398/4404
GO:0005623	cellular_component	Cell	1	1/4404
GO:0044425	cellular_component	Membrane part	1173	1173/4404
GO:0044421	cellular_component	Extracellular region part	27	27/4404
GO:0044422	cellular_component	Organelle part	535	535/4404
GO:0043226	cellular_component	Organelle	919	919/4404
GO:0016020	cellular_component	Membrane	658	658/4404
GO:0030054	cellular_component	Cell junction	154	154/4404
GO:0005576	cellular_component	Extracellular region	413	413/4404
GO:0044464	cellular_component	Cell part	1650	1650/4404
GO:0099080	cellular_component	Supramolecular complex	45	45/4404
GO:0045182	molecular_function	Translation regulator activity	8	8/4404
GO:0140110	molecular_function	Transcription regulator activity	123	123/4404
GO:0005198	molecular_function	Structural molecule activity	29	29/4404
GO:0044183	molecular_function	Protein folding chaperone	11	11/4404
GO:0016209	molecular_function	Antioxidant activity	158	158/4404
GO:0005215	molecular_function	Transporter activity	252	252/4404
GO:0090729	molecular_function	Toxin activity	1	1/4404
GO:0098772	molecular_function	Molecular function regulator	59	59/4404
GO:0140299	molecular_function	Small molecule sensor activity	3	3/4404
GO:0005488	molecular_function	Binding	2168	2168/4404
GO:0045735	molecular_function	Nutrient reservoir activity	34	34/4404
GO:0060089	molecular_function	Molecular transducer activity	27	27/4404
GO:0003824	molecular_function	Catalytic activity	1975	1975/4404

## Sheet: Table S4-5
Table S4-5 GO annotation analysis of DEGs in Ardito_LP vs. CK
GO ID	GO_Classify 1	GO_Classify 2	DEGs Unigene	All Unigene
GO:0001906	biological_process	Cell killing	2	2/1430
GO:0002376	biological_process	Immune system process	7	7/1430
GO:0015976	biological_process	Carbon utilization	1	1/1430
GO:0065007	biological_process	Biological regulation	169	169/1430
GO:0008152	biological_process	Metabolic process	447	447/1430
GO:0051704	biological_process	Multi-organism process	32	32/1430
GO:0022414	biological_process	Reproductive process	15	15/1430
GO:0000003	biological_process	Reproduction	11	11/1430
GO:0008283	biological_process	Cell population proliferation	1	1/1430
GO:0071840	biological_process	Cellular component organization or biogenesis	167	167/1430
GO:0009987	biological_process	Cellular process	511	511/1430
GO:0032502	biological_process	Developmental process	16	16/1430
GO:0032501	biological_process	Multicellular organismal process	15	15/1430
GO:0040007	biological_process	Growth	4	4/1430
GO:0048511	biological_process	Rhythmic process	6	6/1430
GO:0051179	biological_process	Localization	107	107/1430
GO:0098754	biological_process	Detoxification	9	9/1430
GO:0019740	biological_process	Nitrogen utilization	2	2/1430
GO:0050896	biological_process	Response to stimulus	227	227/1430
GO:0031974	cellular_component	Membrane-enclosed lumen	1	1/1430
GO:0032991	cellular_component	Protein-containing complex	199	199/1430
GO:0005623	cellular_component	Cell	1	1/1430
GO:0044425	cellular_component	Membrane part	381	381/1430
GO:0044421	cellular_component	Extracellular region part	14	14/1430
GO:0044422	cellular_component	Organelle part	236	236/1430
GO:0043226	cellular_component	Organelle	338	338/1430
GO:0016020	cellular_component	Membrane	232	232/1430
GO:0030054	cellular_component	Cell junction	58	58/1430
GO:0005576	cellular_component	Extracellular region	155	155/1430
GO:0044464	cellular_component	Cell part	539	539/1430
GO:0099080	cellular_component	Supramolecular complex	10	10/1430
GO:0045182	molecular_function	Translation regulator activity	1	1/1430
GO:0140110	molecular_function	Transcription regulator activity	34	34/1430
GO:0005198	molecular_function	Structural molecule activity	12	12/1430
GO:0044183	molecular_function	Protein folding chaperone	1	1/1430
GO:0016209	molecular_function	Antioxidant activity	59	59/1430
GO:0005215	molecular_function	Transporter activity	88	88/1430
GO:0090729	molecular_function	Toxin activity	1	1/1430
GO:0098772	molecular_function	Molecular function regulator	23	23/1430
GO:0140299	molecular_function	Small molecule sensor activity	1	1/1430
GO:0005488	molecular_function	Binding	744	744/1430
GO:0045735	molecular_function	Nutrient reservoir activity	9	9/1430
GO:0060089	molecular_function	Molecular transducer activity	13	13/1430
GO:0003824	molecular_function	Catalytic activity	612	612/1430

## Sheet: Table S4-6
Table S4-6 GO annotation analysis of DEGs in Ardito_Al vs. LP
GO ID	GO_Classify 1	GO_Classify 2	DEGs Unigene	All Unigene
GO:0002376	biological_process	Immune system process	1	1/390
GO:0065007	biological_process	Biological regulation	42	42/390
GO:0008152	biological_process	Metabolic process	115	115/390
GO:0051704	biological_process	Multi-organism process	2	2/390
GO:0071840	biological_process	Cellular component organization or biogenesis	6	6/390
GO:0009987	biological_process	Cellular process	94	94/390
GO:0032502	biological_process	Developmental process	5	5/390
GO:0032501	biological_process	Multicellular organismal process	7	7/390
GO:0048511	biological_process	Rhythmic process	7	7/390
GO:0051179	biological_process	Localization	26	26/390
GO:0098754	biological_process	Detoxification	1	1/390
GO:0050896	biological_process	Response to stimulus	55	55/390
GO:0032991	cellular_component	Protein-containing complex	7	7/390
GO:0044425	cellular_component	Membrane part	89	89/390
GO:0044421	cellular_component	Extracellular region part	3	3/390
GO:0044422	cellular_component	Organelle part	9	9/390
GO:0043226	cellular_component	Organelle	49	49/390
GO:0016020	cellular_component	Membrane	48	48/390
GO:0030054	cellular_component	Cell junction	2	2/390
GO:0005576	cellular_component	Extracellular region	38	38/390
GO:0044464	cellular_component	Cell part	88	88/390
GO:0099080	cellular_component	Supramolecular complex	1	1/390
GO:0140110	molecular_function	Transcription regulator activity	15	15/390
GO:0044183	molecular_function	Protein folding chaperone	3	3/390
GO:0016209	molecular_function	Antioxidant activity	23	23/390
GO:0005215	molecular_function	Transporter activity	26	26/390
GO:0005488	molecular_function	Binding	156	156/390
GO:0045735	molecular_function	Nutrient reservoir activity	5	5/390
GO:0060089	molecular_function	Molecular transducer activity	2	2/390
GO:0003824	molecular_function	Catalytic activity	171	171/390

## Sheet: Table S4-7
Table S4-7 GO annotation analysis of DEGs in Al_Fielder vs. Ardito
GO ID	GO_Classify 1	GO_Classify 2	DEGs Unigene	All Unigene
GO:0001906	biological_process	Cell killing	1	1/7358
GO:0002376	biological_process	Immune system process	14	14/7358
GO:0015976	biological_process	Carbon utilization	3	3/7358
GO:0065007	biological_process	Biological regulation	717	717/7358
GO:0008152	biological_process	Metabolic process	2035	2035/7358
GO:0051704	biological_process	Multi-organism process	82	82/7358
GO:0022414	biological_process	Reproductive process	102	102/7358
GO:0000003	biological_process	Reproduction	9	9/7358
GO:0008283	biological_process	Cell population proliferation	1	1/7358
GO:0071840	biological_process	Cellular component organization or biogenesis	358	358/7358
GO:0009987	biological_process	Cellular process	2120	2120/7358
GO:0032502	biological_process	Developmental process	100	100/7358
GO:0032501	biological_process	Multicellular organismal process	64	64/7358
GO:0040007	biological_process	Growth	16	16/7358
GO:0048511	biological_process	Rhythmic process	16	16/7358
GO:0051179	biological_process	Localization	492	492/7358
GO:0022610	biological_process	Biological adhesion	2	2/7358
GO:0098754	biological_process	Detoxification	21	21/7358
GO:0023052	biological_process	Signaling	1	1/7358
GO:0019740	biological_process	Nitrogen utilization	3	3/7358
GO:0050896	biological_process	Response to stimulus	997	997/7358
GO:0031974	cellular_component	Membrane-enclosed lumen	24	24/7358
GO:0032991	cellular_component	Protein-containing complex	442	442/7358
GO:0005623	cellular_component	Cell	17	17/7358
GO:0044425	cellular_component	Membrane part	1866	1866/7358
GO:0044421	cellular_component	Extracellular region part	33	33/7358
GO:0044422	cellular_component	Organelle part	598	598/7358
GO:0043226	cellular_component	Organelle	1092	1092/7358
GO:0016020	cellular_component	Membrane	823	823/7358
GO:0030054	cellular_component	Cell junction	89	89/7358
GO:0005576	cellular_component	Extracellular region	360	360/7358
GO:0009295	cellular_component	Nucleoid	5	5/7358
GO:0044464	cellular_component	Cell part	2005	2005/7358
GO:0099080	cellular_component	Supramolecular complex	49	49/7358
GO:0045182	molecular_function	Translation regulator activity	18	18/7358
GO:0140110	molecular_function	Transcription regulator activity	203	203/7358
GO:0005198	molecular_function	Structural molecule activity	52	52/7358
GO:0044183	molecular_function	Protein folding chaperone	14	14/7358
GO:0140104	molecular_function	Molecular carrier activity	1	1/7358
GO:0016209	molecular_function	Antioxidant activity	127	127/7358
GO:0005215	molecular_function	Transporter activity	349	349/7358
GO:0090729	molecular_function	Toxin activity	8	8/7358
GO:0098772	molecular_function	Molecular function regulator	98	98/7358
GO:0140299	molecular_function	Small molecule sensor activity	3	3/7358
GO:0005488	molecular_function	Binding	3795	3795/7358
GO:0045735	molecular_function	Nutrient reservoir activity	27	27/7358
GO:0031386	molecular_function	Protein tag	4	4/7358
GO:0060089	molecular_function	Molecular transducer activity	45	45/7358
GO:0003824	molecular_function	Catalytic activity	2816	2816/7358

## Sheet: Table S4-8
Table S4-8 GO annotation analysis of DEGs in LP_Fielder vs. Ardito
GO ID	GO_Classify 1	GO_Classify 2	DEGs Unigene	All Unigene
GO:0002376	Biological process	Immune system process	15	15/6704
GO:0015976	Biological process	Carbon utilization	2	2/6704
GO:0065007	Biological process	Biological regulation	631	631/6704
GO:0008152	Biological process	Metabolic process	1893	1893/6704
GO:0051704	Biological process	Multi-organism process	83	83/6704
GO:0040011	Biological process	Locomotion	1	1/6704
GO:0022414	Biological process	Reproductive process	75	75/6704
GO:0000003	Biological process	Reproduction	9	9/6704
GO:0071840	Biological process	Cellular component organization or biogenesis	292	292/6704
GO:0009987	Biological process	Cellular process	1843	1843/6704
GO:0032502	Biological process	Developmental process	81	81/6704
GO:0032501	Biological process	Multicellular organismal process	52	52/6704
GO:0040007	Biological process	Growth	12	12/6704
GO:0048511	Biological process	Rhythmic process	5	5/6704
GO:0051179	Biological process	Localization	447	447/6704
GO:0022610	Biological process	Biological adhesion	1	1/6704
GO:0098754	Biological process	Detoxification	22	22/6704
GO:0023052	Biological process	Signaling	1	1/6704
GO:0050896	Biological process	Response to stimulus	850	850/6704
GO:0031974	Cellular component	Membrane-enclosed lumen	24	24/6704
GO:0032991	Cellular component	Protein-containing complex	355	355/6704
GO:0005623	Cellular component	Cell	16	16/6704
GO:0044425	Cellular component	Membrane part	1805	1805/6704
GO:0044421	Cellular component	Extracellular region part	22	22/6704
GO:0044422	Cellular component	Organelle part	486	486/6704
GO:0043226	Cellular component	Organelle	959	959/6704
GO:0016020	Cellular component	Membrane	799	799/6704
GO:0030054	Cellular component	Cell junction	87	87/6704
GO:0005576	Cellular component	Extracellular region	328	328/6704
GO:0009295	Cellular component	Nucleoid	1	1/6704
GO:0044464	Cellular component	Cell part	1795	1795/6704
GO:0099080	Cellular component	Supramolecular complex	27	27/6704
GO:0045182	Molecular function	Translation regulator activity	17	17/6704
GO:0140110	Molecular function	Transcription regulator activity	192	192/6704
GO:0005198	Molecular function	Structural molecule activity	48	48/6704
GO:0044183	Molecular function	Protein folding chaperone	7	7/6704
GO:0140104	Molecular function	Molecular carrier activity	2	2/6704
GO:0016209	Molecular function	Antioxidant activity	108	108/6704
GO:0005215	Molecular function	Transporter activity	347	347/6704
GO:0090729	Molecular function	Toxin activity	9	9/6704
GO:0098772	Molecular function	Molecular function regulator	78	78/6704
GO:0140299	Molecular function	Small molecule sensor activity	3	3/6704
GO:0005488	Molecular function	Binding	3398	3398/6704
GO:0045735	Molecular function	Nutrient reservoir activity	28	28/6704
GO:0031386	Molecular function	Protein tag	3	3/6704
GO:0060089	Molecular function	Molecular transducer activity	42	42/6704
GO:0003824	Molecular function	Catalytic activity	2661	2661/6704
