# Supplementary material for: Exploration of the Commonalities and Specificities in Wheat Respond to Aluminum Toxicity and Low Phosphorus via Transcriptomics and Targeted Metabolomics Study
Source: Preprints.org preprint supplement (doi:10.20944/preprints202408.0689.v1), 2024-08-12
Supplement: Supplementary file 6 [file Table S6. Expression and functional annotation of DEGs related to phenylpropanoid and flavonoid metabolism.xlsx]

## Sheet: Table S6
Table S6-1. Expression and functional annotation of DEGs related to phenylpropanoid metabolism
Gene_id	KO_name	Fielder_CK	Fielder_Al	Fielder_LP	Ardito_CK	Ardito_Al	Ardito_LP	Gene_description	GO_id	GO_term	KO_id	KO_name	Pathway_id	Pathway_definition	EggNOG_id	EggNOG_Functional Categories	NR_hit-name	NR_description	Swiss-Prot_hit-name	Swiss-Prot_description	Pfam_id	Domain	Domain description
TraesCS4B02G075900	4CL	2.05667	1.81333	2.04333	3.20667	4.12333	3.91	-	GO:0016405;GO:0003824;GO:001687	MF:CoA-ligase activity;MF:catalytic activity;MF:ligase activity;	K01904	4CL	map00130;map00940	Ubiquinone and other terpenoid-quinone biosynthesis;Phenylpropanoid biosynthesis	COG0318;COG0318	I:Lipid transport and metabolism;Q:Secondary metabolites biosynthesis, transport and catabolism	XP_037429309.1	4-coumarate--CoA ligase-like 7 [Triticum dicoccoides]	sp|Q69RG7|4CLL7_ORYSJ;	4-coumarate--CoA ligase-like 7 OS=Oryza sativa subsp. japonica OX=39947 GN=4CLL7 PE=2 SV=1;	PF00501.30;PF13193.8	AMP-binding;AMP-binding_C	AMP-binding enzyme;AMP-binding enzyme C-terminal domain
TraesCS4B02G076000	4CL	1.15667	1.06667	2.16667	0.903333	2.2	1.53667	-	GO:000382	MF:catalytic activity;	K01904	4CL	map00130;map00940	Ubiquinone and other terpenoid-quinone biosynthesis;Phenylpropanoid biosynthesis	COG0318;COG0318	I:Lipid transport and metabolism;Q:Secondary metabolites biosynthesis, transport and catabolism	XP_037429310.1	4-coumarate--CoA ligase-like 7 [Triticum dicoccoides]	sp|Q69RG7|4CLL7_ORYSJ;	4-coumarate--CoA ligase-like 7 OS=Oryza sativa subsp. japonica OX=39947 GN=4CLL7 PE=2 SV=1;	PF00501.30;PF13193.8	AMP-binding;AMP-binding_C	AMP-binding enzyme;AMP-binding enzyme C-terminal domain
TraesCS4D02G074600	4CL	2.34333	2.82	4.10333	1.37667	3.83667	2.38	-	------	------	K01904	4CL	map00130;map00940	Ubiquinone and other terpenoid-quinone biosynthesis;Phenylpropanoid biosynthesis	COG0318;COG0318	I:Lipid transport and metabolism;Q:Secondary metabolites biosynthesis, transport and catabolism	XP_020169676.2	LOW QUALITY PROTEIN: 4-coumarate--CoA ligase-like 7 [Aegilops tauschii subsp. strangulata]	sp|Q69RG7|4CLL7_ORYSJ;	4-coumarate--CoA ligase-like 7 OS=Oryza sativa subsp. japonica OX=39947 GN=4CLL7 PE=2 SV=1;	PF00501.30;PF13193.8	AMP-binding;AMP-binding_C	AMP-binding enzyme;AMP-binding enzyme C-terminal domain
TraesCS7A02G496200	4CL	9.45	10.5367	12.9367	5.24667	12.1133	9.24667	4-coumarate:coenzyme A ligase, Lignin biosynthesis, Defense against woundin [Source: Projected from Oryza sativa (Os06g0656500)]	GO:0016207;GO:0003824;GO:001687	MF:4-coumarate-CoA ligase activity;MF:catalytic activity;MF:ligase activity;	K01904	4CL	map00130;map00940	Ubiquinone and other terpenoid-quinone biosynthesis;Phenylpropanoid biosynthesis	COG0318;COG0318	I:Lipid transport and metabolism;Q:Secondary metabolites biosynthesis, transport and catabolism	KAF7098375.1	hypothetical protein CFC21_100121 [Triticum aestivum]	sp|Q67W82|4CL4_ORYSJ;	4-coumarate--CoA ligase 4 OS=Oryza sativa subsp. japonica OX=39947 GN=4CL4 PE=1 SV=1;	PF00501.30;PF13193.8	AMP-binding;AMP-binding_C	AMP-binding enzyme;AMP-binding enzyme C-terminal domain
TraesCS2D02G481900	ANRCH	6.10333	5.84333	7.65333	1.39667	2.72667	2.71667	-	GO:000382	MF:catalytic activity;	K08695	ANR	map00941	Flavonoid biosynthesis	COG0451	M:Cell wall/membrane/envelope biogenesis	KAF7018661.1	hypothetical protein CFC21_031927 [Triticum aestivum]	sp|Q7PCC4|ANRCH_VITVI;	Anthocyanidin reductase;	PF01370.23;PF01073.21;PF13460.8;PF05368.15;PF07993.14;PF16363.7;PF02719.17	Epimerase;3Beta_HSD;NAD_binding_10;NmrA;NAD_binding_4;GDP_Man_Dehyd;Polysacc_synt_2	NAD dependent epimerase/dehydratase family;3-beta hydroxysteroid dehydrogenase/isomerase family;NA;NmrA-like family;Male sterility protein;GDP-mannose 4,6 dehydratase;Polysaccharide biosynthesis protein
TraesCS2A02G482100	ANRCS	1.03667	1.92	1.85333	0.86	1.17667	0.893333	-	GO:000382	MF:catalytic activity;	K08695	ANR	map00941	Flavonoid biosynthesis	COG0451	M:Cell wall/membrane/envelope biogenesis	XP_037479508.1	anthocyanidin reductase ((2S)-flavan-3-ol-forming)-like [Triticum dicoccoides]	sp|Q5FB34|ANRCS_VITVI;	Anthocyanidin reductase;	PF01370.23;PF01073.21;PF13460.8;PF05368.15;PF16363.7	Epimerase;3Beta_HSD;NAD_binding_10;NmrA;GDP_Man_Dehyd	NAD dependent epimerase/dehydratase family;3-beta hydroxysteroid dehydrogenase/isomerase family;NA;NmrA-like family;GDP-mannose 4,6 dehydratase
TraesCS2D02G482100	ANRCS	19.1233	21.7867	23.1667	0.073333	0.033333	0.096667	-	GO:0003824;GO:005066	MF:catalytic activity;MF:coenzyme binding;	K08695	ANR	map00941	Flavonoid biosynthesis	COG0451	M:Cell wall/membrane/envelope biogenesis	XP_040255795.1	anthocyanidin reductase ((2S)-flavan-3-ol-forming)-like [Aegilops tauschii subsp. strangulata]	sp|Q5FB34|ANRCS_VITVI;	Anthocyanidin reductase;	PF01370.23;PF01073.21;PF05368.15;PF13460.8;PF16363.7	Epimerase;3Beta_HSD;NmrA;NAD_binding_10;GDP_Man_Dehyd	NAD dependent epimerase/dehydratase family;3-beta hydroxysteroid dehydrogenase/isomerase family;NmrA-like family;NA;GDP-mannose 4,6 dehydratase
TraesCS2B02G612700	ANRPN	8.30333	14.7467	15.6333	5.24667	6.37333	6.17	-	GO:0003824;GO:001661	MF:catalytic activity;MF:oxidoreductase activity, acting on the CH-OH group of donors, NAD or NADP as acceptor;	K08695	ANR	map00941	Flavonoid biosynthesis	COG0451	M:Cell wall/membrane/envelope biogenesis	XP_037488189.1	anthocyanidin reductase ((2S)-flavan-3-ol-forming)-like isoform X2 [Triticum dicoccoides]	sp|D7U6G6|ANRPN_VITVI;	Anthocyanidin reductase;	PF01370.23;PF01073.21;PF13460.8;PF07993.14;PF16363.7;PF05368.15;PF00106.27	Epimerase;3Beta_HSD;NAD_binding_10;NAD_binding_4;GDP_Man_Dehyd;NmrA;adh_short	NAD dependent epimerase/dehydratase family;3-beta hydroxysteroid dehydrogenase/isomerase family;NA;Male sterility protein;GDP-mannose 4,6 dehydratase;NmrA-like family;short chain dehydrogenase
TraesCS2B02G612800	ANRPN	2.17333	2.49667	2.38	5.24	5.37	5.29333	-	GO:0003824;GO:001661	MF:catalytic activity;MF:oxidoreductase activity, acting on the CH-OH group of donors, NAD or NADP as acceptor;	K08695	ANR	map00941	Flavonoid biosynthesis	COG0451	M:Cell wall/membrane/envelope biogenesis	XP_037488189.1	anthocyanidin reductase ((2S)-flavan-3-ol-forming)-like isoform X2 [Triticum dicoccoides]	sp|D7U6G6|ANRPN_VITVI;	Anthocyanidin reductase;	PF01370.23;PF01073.21;PF13460.8;PF07993.14;PF16363.7;PF05368.15;PF00106.27	Epimerase;3Beta_HSD;NAD_binding_10;NAD_binding_4;GDP_Man_Dehyd;NmrA;adh_short	NAD dependent epimerase/dehydratase family;3-beta hydroxysteroid dehydrogenase/isomerase family;NA;Male sterility protein;GDP-mannose 4,6 dehydratase;NmrA-like family;short chain dehydrogenase
TraesCS6A02G001500	ANS1	3.07	3.33333	2.99	0.443333	0.793333	0.496667	Anthocyanidin synthase [Source:UniProtKB/TrEMBL;Acc:Q0WYI8]	GO:0046872;GO:0051213;GO:001649	MF:metal ion binding;MF:dioxygenase activity;MF:oxidoreductase activity;	K05277	ANS	map00941	Flavonoid biosynthesis	COG3491	S:Function unknown	KAF7076725.1	hypothetical protein CFC21_081338 [Triticum aestivum]	sp|Q93VC3|ANS1_ORYSJ;	Leucoanthocyanidin dioxygenase 1 OS=Oryza sativa subsp. japonica OX=39947 GN=ANS1 PE=2 SV=1;	PF03171.22;PF14226.8	2OG-FeII_Oxy;DIOX_N	2OG-F;non-haem dioxygenase in morphine synthesis N-terminal
TraesCS3D02G336900	C4H	16.7467	15.2733	16.1	8.30333	17.58	15.1833	-	GO:0009808;GO:0016021;GO:0004497;GO:0020037;GO:0016705;GO:0016710;GO:0018658;GO:000550	BP:lignin metabolic process;CC:integral component of membrane;MF:monooxygenase activity;MF:heme binding;MF:oxidoreductase activity, acting on paired donors, with incorporation or reduction of molecular oxygen;MF:trans-cinnamate 4-monooxygenase activity;MF:salicylate 1-monooxygenase activity;MF:iron ion binding;	K00487	CYP73A	map00130;map00940;map00941;map00945	Ubiquinone and other terpenoid-quinone biosynthesis;Phenylpropanoid biosynthesis;Flavonoid biosynthesis;Stilbenoid, diarylheptanoid and gingerol biosynthesis	COG2124	Q:Secondary metabolites biosynthesis, transport and catabolism	XP_020185998.1	LOW QUALITY PROTEIN: trans-cinnamate 4-monooxygenase [Aegilops tauschii subsp. strangulata]	sp|P37115|TCMO_VIGRR;	Trans-cinnamate 4-monooxygenase OS=Vigna radiata var. radiata OX=3916 GN=CYP73A2 PE=1 SV=1;	PF00067.24	p450	Cytochrome P450
TraesCS5A02G534000	C4H	2.72667	4.44	5.13	4.26667	10.5567	7.05667	-	GO:0009808;GO:0016021;GO:0004497;GO:0020037;GO:0016705;GO:0016710;GO:000550	BP:lignin metabolic process;CC:integral component of membrane;MF:monooxygenase activity;MF:heme binding;MF:oxidoreductase activity, acting on paired donors, with incorporation or reduction of molecular oxygen;MF:trans-cinnamate 4-monooxygenase activity;MF:iron ion binding;	K00487	CYP73A	map00130;map00940;map00941;map00945	Ubiquinone and other terpenoid-quinone biosynthesis;Phenylpropanoid biosynthesis;Flavonoid biosynthesis;Stilbenoid, diarylheptanoid and gingerol biosynthesis	COG2124	Q:Secondary metabolites biosynthesis, transport and catabolism	KAF7062591.1	hypothetical protein CFC21_069168 [Triticum aestivum]	sp|Q94IP1|TCMO_SORBI;	Trans-cinnamate 4-monooxygenase OS=Sorghum bicolor OX=4558 GN=CYP73A33 PE=1 SV=1;	PF00067.24	p450	Cytochrome P450
TraesCS7B02G299500	C4H	0.19	0.366667	0.253333	0.096667	0.073333	0.37	-	GO:0016021;GO:0004497;GO:0016705;GO:0005506;GO:002003	CC:integral component of membrane;MF:monooxygenase activity;MF:oxidoreductase activity, acting on paired donors, with incorporation or reduction of molecular oxygen;MF:iron ion binding;MF:heme binding;	K00487	CYP73A	map00130;map00940;map00941;map00945	Ubiquinone and other terpenoid-quinone biosynthesis;Phenylpropanoid biosynthesis;Flavonoid biosynthesis;Stilbenoid, diarylheptanoid and gingerol biosynthesis	COG2124	Q:Secondary metabolites biosynthesis, transport and catabolism	XP_037463511.1	cytochrome P450 CYP73A100-like [Triticum dicoccoides]	sp|H2DH22|C7A10_PANGI;	Cytochrome P450 CYP73A100 OS=Panax ginseng OX=4054 PE=2 SV=1;	PF00067.24	p450	Cytochrome P450
TraesCS5A02G146900	CHIL2	3.35	3.27333	3.43667	3.08667	7.58	6.49667	-	GO:0005794;GO:0016021;GO:0016872;GO:000550	CC:Golgi apparatus;CC:integral component of membrane;MF:intramolecular lyase activity;MF:calcium ion binding;	K01859	E5.5.1.6	map00941	Flavonoid biosynthesis	ENOG4111ZUZ	S:Function unknown	XP_037433748.1	probable chalcone--flavonone isomerase 3 [Triticum dicoccoides]	sp|A0A2U7XUE3|CHIL2_HUMLU;	Chalcone isomerase-like protein 2 OS=Humulus lupulus OX=3486 GN=CHIL2 PE=1 SV=1;	PF02431.17;PF16035.7	Chalcone;Chalcone_2	Chalcone-flavanone isomerase;Chalcone isomerase like
TraesCS5B02G145800	CHIL2	3.06667	2.81667	2.85	2.08333	5.83667	4.60333	-	GO:0005794;GO:0016021;GO:0016872;GO:000550	CC:Golgi apparatus;CC:integral component of membrane;MF:intramolecular lyase activity;MF:calcium ion binding;	K01859	E5.5.1.6	map00941	Flavonoid biosynthesis	ENOG4111ZUZ	S:Function unknown	KAF7064735.1	hypothetical protein CFC21_070989 [Triticum aestivum]	sp|A0A2U7XUE3|CHIL2_HUMLU;	Chalcone isomerase-like protein 2 OS=Humulus lupulus OX=3486 GN=CHIL2 PE=1 SV=1;	PF02431.17;PF16035.7	Chalcone;Chalcone_2	Chalcone-flavanone isomerase;Chalcone isomerase like
TraesCS2B02G558400	CHS1	3.06333	1.75	3.14333	1.46	6.22333	2.88333	-	GO:0030639;GO:0009813;GO:0009058;GO:0016210;GO:0016746;GO:001674	BP:polyketide biosynthetic process;BP:flavonoid biosynthetic process;BP:biosynthetic process;MF:naringenin-chalcone synthase activity;MF:transferase activity, transferring acyl groups;MF:transferase activity, transferring acyl groups other than amino-acyl groups;	K00660	CHS	map04712;map00941	Circadian rhythm - plant;Flavonoid biosynthesis	COG3424	Q:Secondary metabolites biosynthesis, transport and catabolism	KAF7019254.1	hypothetical protein CFC21_032449 [Triticum aestivum]	sp|P26018|CHS1_HORVU;	Chalcone synthase 1 OS=Hordeum vulgare OX=4513 GN=CHS1 PE=3 SV=1;	PF00195.21;PF02797.17;PF08545.12;PF08541.12;PF08392.14	Chal_sti_synt_N;Chal_sti_synt_C;ACP_syn_III;ACP_syn_III_C;FAE1_CUT1_RppA	Chalcone and stilbene synthases, N-terminal domain;Chalcone and stilbene synthases, C-terminal domain;3-Oxoacyl-[acyl-carrier-protein;3-Oxoacyl-[acyl-carrier-protein;FAE1/Type III polyketide synthase-like protein
TraesCS2B02G613100	CHS2	5.82667	10.3367	14.4767	8.8	27.8533	20.4733	-	GO:0030639;GO:0009813;GO:0009058;GO:0016210;GO:0016740;GO:0016746;GO:001674	BP:polyketide biosynthetic process;BP:flavonoid biosynthetic process;BP:biosynthetic process;MF:naringenin-chalcone synthase activity;MF:transferase activity;MF:transferase activity, transferring acyl groups;MF:transferase activity, transferring acyl groups other than amino-acyl groups;	K00660	CHS	map04712;map00941	Circadian rhythm - plant;Flavonoid biosynthesis	COG3424	Q:Secondary metabolites biosynthesis, transport and catabolism	XP_037488193.1	chalcone synthase 2-like [Triticum dicoccoides]	sp|P53415|CHS2_SECCE;	Chalcone synthase 2 OS=Secale cereale OX=4550 GN=CHS2 PE=2 SV=1;	PF00195.21;PF02797.17;PF08392.14;PF08545.12;PF08541.12	Chal_sti_synt_N;Chal_sti_synt_C;FAE1_CUT1_RppA;ACP_syn_III;ACP_syn_III_C	Chalcone and stilbene synthases, N-terminal domain;Chalcone and stilbene synthases, C-terminal domain;FAE1/Type III polyketide synthase-like protein;3-Oxoacyl-[acyl-carrier-protein;3-Oxoacyl-[acyl-carrier-protein
TraesCS2B02G531600	F3'5'H	4.99667	6.26	7.20667	0.636667	2.32333	1.14667	-	GO:0016021;GO:0016705;GO:0004497;GO:0005506;GO:002003	CC:integral component of membrane;MF:oxidoreductase activity, acting on paired donors, with incorporation or reduction of molecular oxygen;MF:monooxygenase activity;MF:iron ion binding;MF:heme binding;	K13083	CYP75A	map00941;map00944	Flavonoid biosynthesis;Flavone and flavonol biosynthesis	COG2124	Q:Secondary metabolites biosynthesis, transport and catabolism	KAF7060524.1	hypothetical protein CFC21_067312 [Triticum aestivum]	sp|P48418|C75A1_PETHY;	Flavonoid 3',5'-hydroxylase 1 OS=Petunia hybrida OX=4102 GN=CYP75A1 PE=1 SV=1;	PF00067.24	p450	Cytochrome P450
TraesCS5A02G518800	F3'5'H	21.17	20.32	11.53	14.3	4.41333	7.50333	-	GO:0016021;GO:0005506;GO:0016705;GO:0004497;GO:002003	CC:integral component of membrane;MF:iron ion binding;MF:oxidoreductase activity, acting on paired donors, with incorporation or reduction of molecular oxygen;MF:monooxygenase activity;MF:heme binding;	K13083	CYP75A	map00941;map00944	Flavonoid biosynthesis;Flavone and flavonol biosynthesis	COG2124	Q:Secondary metabolites biosynthesis, transport and catabolism	VAH09094.1	unnamed protein product [Triticum turgidum subsp. durum]	sp|P48418|C75A1_PETHY;	Flavonoid 3',5'-hydroxylase 1 OS=Petunia hybrida OX=4102 GN=CYP75A1 PE=1 SV=1;	------	------	------
TraesCS6A02G005400	F3'5'H	8.84	9.69	6.59333	0.77	0.63	0.683333	-	GO:0016021;GO:0004497;GO:0016705;GO:0005506;GO:002003	CC:integral component of membrane;MF:monooxygenase activity;MF:oxidoreductase activity, acting on paired donors, with incorporation or reduction of molecular oxygen;MF:iron ion binding;MF:heme binding;	K13083	CYP75A	map00941;map00944	Flavonoid biosynthesis;Flavone and flavonol biosynthesis	COG2124	Q:Secondary metabolites biosynthesis, transport and catabolism	KAF7076768.1	hypothetical protein CFC21_081377 [Triticum aestivum]	sp|P48418|C75A1_PETHY;	Flavonoid 3',5'-hydroxylase 1 OS=Petunia hybrida OX=4102 GN=CYP75A1 PE=1 SV=1;	PF00067.24	p450	Cytochrome P450
TraesCS6B02G011000	F3'5'H	7.46667	8.19333	6.78667	3.3	3.02	2.64	-	GO:0016021;GO:0004497;GO:0016705;GO:0005506;GO:002003	CC:integral component of membrane;MF:monooxygenase activity;MF:oxidoreductase activity, acting on paired donors, with incorporation or reduction of molecular oxygen;MF:iron ion binding;MF:heme binding;	K13083	CYP75A	map00941;map00944	Flavonoid biosynthesis;Flavone and flavonol biosynthesis	COG2124	Q:Secondary metabolites biosynthesis, transport and catabolism	KAF7081903.1	hypothetical protein CFC21_085808 [Triticum aestivum]	sp|P48418|C75A1_PETHY;	Flavonoid 3',5'-hydroxylase 1 OS=Petunia hybrida OX=4102 GN=CYP75A1 PE=1 SV=1;	PF00067.24	p450	Cytochrome P450
TraesCS6B02G011200	F3'5'H	4.06	4.78333	3.7	1.89	1.76333	1.43667	-	GO:0016021;GO:0016705;GO:0004497;GO:0005506;GO:002003	CC:integral component of membrane;MF:oxidoreductase activity, acting on paired donors, with incorporation or reduction of molecular oxygen;MF:monooxygenase activity;MF:iron ion binding;MF:heme binding;	K13083	CYP75A	map00941;map00944	Flavonoid biosynthesis;Flavone and flavonol biosynthesis	COG2124	Q:Secondary metabolites biosynthesis, transport and catabolism	KAF7081905.1	hypothetical protein CFC21_085810 [Triticum aestivum]	sp|P48418|C75A1_PETHY;	Flavonoid 3',5'-hydroxylase 1 OS=Petunia hybrida OX=4102 GN=CYP75A1 PE=1 SV=1;	PF00067.24	p450	Cytochrome P450
TraesCS6B02G135700	F3'5'H	25.1133	17.3267	10.3767	7.38333	1.81	2.72667	-	GO:0016021;GO:0005506;GO:0016705;GO:0004497;GO:002003	CC:integral component of membrane;MF:iron ion binding;MF:oxidoreductase activity, acting on paired donors, with incorporation or reduction of molecular oxygen;MF:monooxygenase activity;MF:heme binding;	K13083	CYP75A	map00941;map00944	Flavonoid biosynthesis;Flavone and flavonol biosynthesis	COG2124	Q:Secondary metabolites biosynthesis, transport and catabolism	KAF7083431.1	hypothetical protein CFC21_087224 [Triticum aestivum]	sp|Q96418|C75A5_EUSER;	Flavonoid 3',5'-hydroxylase OS=Eustoma exaltatum subsp. russellianum OX=52518 GN=CYP75A5 PE=2 SV=1;	------	------	------
TraesCS2A02G511300	F3GT	1.68	1.88333	1.69	2.67333	1.30333	1.53	-	GO:0016758;GO:000819	MF:transferase activity, transferring hexosyl groups;MF:UDP-glycosyltransferase activity;	------	------	------	------	COG1819	S:Function unknown	KAF7004328.1	hypothetical protein CFC21_019563 [Triticum aestivum]	sp|Q9C9B0|U89B1_ARATH;	Flavonol 3-O-glucosyltransferase UGT89B1 OS=Arabidopsis thaliana OX=3702 GN=UGT89B1 PE=1 SV=2;	PF00201.20	UDPGT	UDP-glucoronosyl and UDP-glucosyl transferase
TraesCS2B02G613300	F3H	2.50333	3.93	5.72333	4.50333	10.7767	8.16	-	GO:0046872;GO:0051213;GO:001649	MF:metal ion binding;MF:dioxygenase activity;MF:oxidoreductase activity;	K00475	F3H	map00941	Flavonoid biosynthesis	COG3491	S:Function unknown	KAF7012572.1	hypothetical protein CFC21_026750 [Triticum aestivum]	sp|P28038|FL3H_HORVU;	Naringenin,2-oxoglutarate 3-dioxygenase OS=Hordeum vulgare OX=4513 PE=2 SV=1;	PF03171.22;PF14226.8	2OG-FeII_Oxy;DIOX_N	2OG-F;non-haem dioxygenase in morphine synthesis N-terminal
TraesCS4B02G346900	F3H	2.06667	1.09333	2.69667	2.77	3.77667	3.01667	-	GO:0010150;GO:0009751;GO:0002229;GO:0009620;GO:0042742;GO:0046872;GO:0033759;GO:0051213;GO:0034785;GO:001649	BP:leaf senescence;BP:response to salicylic acid;BP:defense response to oomycetes;BP:response to fungus;BP:defense response to bacterium;MF:metal ion binding;MF:flavone synthase activity;MF:dioxygenase activity;MF:salicylate 5-hydroxylase activity;MF:oxidoreductase activity;	K24028	DMR6, DLO	------	------	COG3491	S:Function unknown	XP_037426772.1	flavanone 3-dioxygenase 2-like [Triticum dicoccoides]	sp|Q8W2X5|FL3H2_ORYSJ;	Flavanone 3-dioxygenase 2 OS=Oryza sativa subsp. japonica OX=39947 GN=F3H-2 PE=1 SV=1;	PF03171.22;PF14226.8	2OG-FeII_Oxy;DIOX_N	2OG-F;non-haem dioxygenase in morphine synthesis N-terminal
TraesCS5A02G515600	F3H	2.67	1.89667	3.47	2.48	4.28333	3.16333	-	GO:0010150;GO:0009751;GO:0002229;GO:0009620;GO:0042742;GO:0046872;GO:0033759;GO:0051213;GO:0034785;GO:001649	BP:leaf senescence;BP:response to salicylic acid;BP:defense response to oomycetes;BP:response to fungus;BP:defense response to bacterium;MF:metal ion binding;MF:flavone synthase activity;MF:dioxygenase activity;MF:salicylate 5-hydroxylase activity;MF:oxidoreductase activity;	K24028	DMR6, DLO	------	------	COG3491	S:Function unknown	XP_037437198.1	flavanone 3-dioxygenase 2-like isoform X1 [Triticum dicoccoides]	sp|Q8W2X5|FL3H2_ORYSJ;	Flavanone 3-dioxygenase 2 OS=Oryza sativa subsp. japonica OX=39947 GN=F3H-2 PE=1 SV=1;	PF03171.22;PF14226.8	2OG-FeII_Oxy;DIOX_N	2OG-F;non-haem dioxygenase in morphine synthesis N-terminal
TraesCS2A02G081100	FG2	0.556667	0.5	0.553333	1.47	1.54667	1.97	-	GO:0016758;GO:000819	MF:transferase activity, transferring hexosyl groups;MF:UDP-glycosyltransferase activity;	K22772	FG2	map00944	Flavone and flavonol biosynthesis	COG1819	S:Function unknown	KAF6999096.1	hypothetical protein CFC21_015167 [Triticum aestivum]	sp|Q43716|UFOG_PETHY;	Anthocyanidin-3-O-glucoside rhamnosyltransferase OS=Petunia hybrida OX=4102 GN=RT PE=2 SV=1;	PF00201.20	UDPGT	UDP-glucoronosyl and UDP-glucosyl transferase
TraesCS5A02G513700	FLS	0.43	0.086667	0.173333	0.3	0.87	0.513333	-	GO:0046872;GO:001649	MF:metal ion binding;MF:oxidoreductase activity;	K05278	FLS	map00941	Flavonoid biosynthesis	COG3491	S:Function unknown	KAF7062348.1	hypothetical protein CFC21_068957 [Triticum aestivum]	sp|Q9ZWQ9|FLS_CITUN;	Flavonol synthase/flavanone 3-hydroxylase OS=Citrus unshiu OX=55188 GN=FLS PE=1 SV=1;	PF03171.22;PF14226.8	2OG-FeII_Oxy;DIOX_N	2OG-F;non-haem dioxygenase in morphine synthesis N-terminal
TraesCS6A02G331400	FLS	8.15667	5.87333	6.56667	9.91	13.3833	8.19667	-	GO:0009416;GO:0046872;GO:0045431;GO:0051213;GO:001649	BP:response to light stimulus;MF:metal ion binding;MF:flavonol synthase activity;MF:dioxygenase activity;MF:oxidoreductase activity;	K05278	FLS	map00941	Flavonoid biosynthesis	COG3491	S:Function unknown	KAF7080672.1	hypothetical protein CFC21_084707 [Triticum aestivum]	sp|Q9ZWQ9|FLS_CITUN;	Flavonol synthase/flavanone 3-hydroxylase OS=Citrus unshiu OX=55188 GN=FLS PE=1 SV=1;	PF03171.22;PF14226.8	2OG-FeII_Oxy;DIOX_N	2OG-F;non-haem dioxygenase in morphine synthesis N-terminal
TraesCS6B02G362100	FLS	1.09333	0.236667	0.366667	1.34	1.25	0.5	-	GO:0009416;GO:0046872;GO:0045431;GO:0051213;GO:001649	BP:response to light stimulus;MF:metal ion binding;MF:flavonol synthase activity;MF:dioxygenase activity;MF:oxidoreductase activity;	K05278	FLS	map00941	Flavonoid biosynthesis	COG3491	S:Function unknown	KAF7086157.1	hypothetical protein CFC21_089487 [Triticum aestivum]	sp|Q9ZWQ9|FLS_CITUN;	Flavonol synthase/flavanone 3-hydroxylase OS=Citrus unshiu OX=55188 GN=FLS PE=1 SV=1;	PF03171.22;PF14226.8	2OG-FeII_Oxy;DIOX_N	2OG-F;non-haem dioxygenase in morphine synthesis N-terminal
TraesCS2D02G043500	FNS	0.093333	0.09	0.24	0.123333	0.896667	0.46	Flavone synthase II (FNSII), Biosynthesis of tricin O-linked conjugate [Source: Projected from Oryza sativa (Os04g0101400)]	GO:0016021;GO:0004497;GO:0016705;GO:0005506;GO:002003	CC:integral component of membrane;MF:monooxygenase activity;MF:oxidoreductase activity, acting on paired donors, with incorporation or reduction of molecular oxygen;MF:iron ion binding;MF:heme binding;	K23180	CYP93G1	map00943;map00941	Isoflavonoid biosynthesis;Flavonoid biosynthesis	COG2124	Q:Secondary metabolites biosynthesis, transport and catabolism	KAF7013300.1	hypothetical protein CFC21_027389 [Triticum aestivum]	sp|Q0JFI2|C93G1_ORYSJ;	Cytochrome P450 93G1 OS=Oryza sativa subsp. japonica OX=39947 GN=CYP93G1 PE=1 SV=1;	PF00067.24	p450	Cytochrome P450
TraesCS6B02G047900	HIDH	5.50333	3.57333	4.06333	1.3	1.76667	1.39667	-	GO:001678	MF:hydrolase activity;	------	------	------	------	COG0657	I:Lipid transport and metabolism	XP_037451277.1	2-hydroxyisoflavanone dehydratase-like [Triticum dicoccoides]	sp|Q5NUF4|HIDM_GLYEC;	2-hydroxyisoflavanone dehydratase OS=Glycyrrhiza echinata OX=46348 GN=HIDM PE=1 SV=1;	PF07859.15;PF00135.30	Abhydrolase_3;COesterase	alpha/beta hydrolase fold;Carboxylesterase family
TraesCS7A02G172600	HIDH	14.1667	11.8867	17.9667	5.52333	11.3733	10.1033	-	GO:001678	MF:hydrolase activity;	------	------	------	------	COG0657	I:Lipid transport and metabolism	KAF7094420.1	hypothetical protein CFC21_096730 [Triticum aestivum]	sp|Q5NUF4|HIDM_GLYEC;	2-hydroxyisoflavanone dehydratase OS=Glycyrrhiza echinata OX=46348 GN=HIDM PE=1 SV=1;	PF07859.15;PF00135.30;PF10503.11	Abhydrolase_3;COesterase;Esterase_PHB	alpha/beta hydrolase fold;Carboxylesterase family;Esterase PHB depolymerase
TraesCS7D02G173400	HIDH	2.01333	2.23333	3.28667	3.00333	6.93333	5.49333	-	GO:001678	MF:hydrolase activity;	------	------	------	------	COG0657	I:Lipid transport and metabolism	XP_020170624.1	2-hydroxyisoflavanone dehydratase [Aegilops tauschii subsp. strangulata]	sp|Q5NUF4|HIDM_GLYEC;	2-hydroxyisoflavanone dehydratase OS=Glycyrrhiza echinata OX=46348 GN=HIDM PE=1 SV=1;	PF07859.15;PF00135.30;PF10503.11	Abhydrolase_3;COesterase;Esterase_PHB	alpha/beta hydrolase fold;Carboxylesterase family;Esterase PHB depolymerase
TraesCS1B02G048400	PAL	1.48333	1.18	1.43	1.53667	5.37667	3.29	Phenylalanine ammonia-lyase [Source:UniProtKB/TrEMBL;Acc:W5AB62]	GO:0006559;GO:0009800;GO:0005737;GO:0016841;GO:0003824;GO:004554	BP:L-phenylalanine catabolic process;BP:cinnamic acid biosynthetic process;CC:cytoplasm;MF:ammonia-lyase activity;MF:catalytic activity;MF:phenylalanine ammonia-lyase activity;	K10775	PAL	map00940;map00360	Phenylpropanoid biosynthesis;Phenylalanine metabolism	------	------	KAF6987458.1	hypothetical protein CFC21_005105 [Triticum aestivum]	sp|Q43210|PALY_WHEAT;	Phenylalanine ammonia-lyase OS=Triticum aestivum OX=4565 GN=PAL PE=3 SV=1;	PF00221.21	Lyase_aromatic	Aromatic amino acid lyase
TraesCS6A02G222700	PAL	2.2	3.17333	3.14667	0.526667	1.68333	1.69667	Phenylalanine ammonia-lyase [Source:UniProtKB/TrEMBL;Acc:A0A1D6A710]	GO:0006559;GO:0009800;GO:0005737;GO:0016841;GO:0003824;GO:004554	BP:L-phenylalanine catabolic process;BP:cinnamic acid biosynthetic process;CC:cytoplasm;MF:ammonia-lyase activity;MF:catalytic activity;MF:phenylalanine ammonia-lyase activity;	K10775	PAL	map00940;map00360	Phenylpropanoid biosynthesis;Phenylalanine metabolism	COG2986	E:Amino acid transport and metabolism	KAF7079410.1	hypothetical protein CFC21_083645 [Triticum aestivum]	sp|A2X7F7|PAL2_ORYSI;	Phenylalanine ammonia-lyase OS=Oryza sativa subsp. indica OX=39946 GN=ZB8 PE=3 SV=1;	PF00221.21	Lyase_aromatic	Aromatic amino acid lyase
TraesCS6B02G258600	PAL	4.34	4.40667	5.56333	0.926667	2.65667	2.47333	Phenylalanine ammonia-lyase [Source:UniProtKB/TrEMBL;Acc:A0A1D6AQ04]	GO:0006559;GO:0009800;GO:0005737;GO:0016841;GO:0003824;GO:004554	BP:L-phenylalanine catabolic process;BP:cinnamic acid biosynthetic process;CC:cytoplasm;MF:ammonia-lyase activity;MF:catalytic activity;MF:phenylalanine ammonia-lyase activity;	K10775	PAL	map00940;map00360	Phenylpropanoid biosynthesis;Phenylalanine metabolism	COG2986	E:Amino acid transport and metabolism	XP_037454279.1	phenylalanine ammonia-lyase-like [Triticum dicoccoides]	sp|A2X7F7|PAL2_ORYSI;	Phenylalanine ammonia-lyase OS=Oryza sativa subsp. indica OX=39946 GN=ZB8 PE=3 SV=1;	PF00221.21	Lyase_aromatic	Aromatic amino acid lyase
