# Supplementary material for: Exploration of the Commonalities and Specificities in Wheat Respond to Aluminum Toxicity and Low Phosphorus via Transcriptomics and Targeted Metabolomics Study
Source: Preprints.org preprint supplement (doi:10.20944/preprints202408.0689.v1), 2024-08-12
Supplement: Supplementary file 7 [file Table S7. Expression and functional annotation of DEGs related to carbohydrate metabolism.xlsx]

## Sheet: Table S7
Table S7. Expression and functional annotation of DEGs related to carbohydrate metabolism.
Gene_id	KO_name	Fielder_CK	Ardito_CK	Fielder_Al	Ardito_Al	Fielder_LP	Ardito_LP	Gene_description	GO_id	GO_term	KO_id	KO_name	Pathway_id	Pathway_definition	EggNOG_id	EggNOG_Functional Categories	NR_hit-name	NR_description	Swiss-Prot_hit-name	Swiss-Prot_description	Pfam_id	Domain	Domain description
TraesCS7B02G309200	ACLY	4.07	2.86333	5.21	6.62333	7.34	4.73333	-	GO:0006629;GO:0006085;GO:0006633;GO:0005737;GO:0005829;GO:0046912;GO:0000166;GO:0003824;GO:000387	BP:lipid metabolic process;BP:acetyl-CoA biosynthetic process;BP:fatty acid biosynthetic process;CC:cytoplasm;CC:cytosol;MF:transferase activity, transferring acyl groups, acyl groups converted into alkyl on transfer;MF:nucleotide binding;MF:catalytic activity;MF:ATP citrate synthase activity;	K01648	ACLY	map00020	Citrate cycle (TCA cycle)	COG0074	C:Energy production and conversion	VAI90854.1	unnamed protein product [Triticum turgidum subsp. durum]	sp|Q93VT8|ACLB1_ORYSJ;	ATP-citrate synthase beta chain protein 1 OS=Oryza sativa subsp. japonica OX=39947 GN=ACLB-1 PE=2 SV=1;	PF00285.23;PF00549.21;PF13607.8	Citrate_synt;Ligase_CoA;Succ_CoA_lig	Citrate synthase, C-terminal domain;CoA-ligase;Succinyl-CoA ligase like flavodoxin domain
TraesCS7A02G409800	ACLY	7.67	5.04	7.95667	11.0833	8.72	9.07667	-	GO:0006629;GO:0006085;GO:0006633;GO:0005737;GO:0005829;GO:0046912;GO:0000166;GO:0003824;GO:0003878;GO:0005524;GO:0046872;GO:001682	BP:lipid metabolic process;BP:acetyl-CoA biosynthetic process;BP:fatty acid biosynthetic process;CC:cytoplasm;CC:cytosol;MF:transferase activity, transferring acyl groups, acyl groups converted into alkyl on transfer;MF:nucleotide binding;MF:catalytic activity;MF:ATP citrate synthase activity;MF:ATP binding;MF:metal ion binding;MF:lyase activity;	K01648	ACLY	map00020	Citrate cycle (TCA cycle)	COG0074	C:Energy production and conversion	KAF7097348.1	hypothetical protein CFC21_099177 [Triticum aestivum]	sp|Q93VT8|ACLB1_ORYSJ;	ATP-citrate synthase beta chain protein 1 OS=Oryza sativa subsp. japonica OX=39947 GN=ACLB-1 PE=2 SV=1;	PF00285.23;PF00549.21;PF13607.8	Citrate_synt;Ligase_CoA;Succ_CoA_lig	Citrate synthase, C-terminal domain;CoA-ligase;Succinyl-CoA ligase like flavodoxin domain
TraesCS4A02G172800	ACLY	16.2	13.2433	24.2867	29.3367	27.5533	23.6433	-	GO:0006629;GO:0005829;GO:0003878;GO:000552	BP:lipid metabolic process;CC:cytosol;MF:ATP citrate synthase activity;MF:ATP binding;	K01648	ACLY	map00020	Citrate cycle (TCA cycle)	COG0045	C:Energy production and conversion	VAH92264.1	unnamed protein product [Triticum turgidum subsp. durum]	sp|Q2QZ86|ACLA2_ORYSJ;	ATP-citrate synthase alpha chain protein 2 OS=Oryza sativa subsp. japonica OX=39947 GN=ACLA-2 PE=2 SV=2;	PF16114.7;PF08442.12	Citrate_bind;ATP-grasp_2	ATP citrate lyase citrate-binding;ATP-grasp domain
TraesCS3D02G195700	ACLY	29.8967	6.48333	36.1767	14.22	42.9367	9.39333	-	GO:0006629;GO:0006085;GO:0006633;GO:0005737;GO:0005829;GO:0046912;GO:0016740;GO:0000166;GO:0003824;GO:000387	BP:lipid metabolic process;BP:acetyl-CoA biosynthetic process;BP:fatty acid biosynthetic process;CC:cytoplasm;CC:cytosol;MF:transferase activity, transferring acyl groups, acyl groups converted into alkyl on transfer;MF:transferase activity;MF:nucleotide binding;MF:catalytic activity;MF:ATP citrate synthase activity;	K01648	ACLY	map00020	Citrate cycle (TCA cycle)	COG0074	C:Energy production and conversion	XP_020192152.1	ATP-citrate synthase beta chain protein 1 [Aegilops tauschii subsp. strangulata]	sp|Q93VT8|ACLB1_ORYSJ;	ATP-citrate synthase beta chain protein 1 OS=Oryza sativa subsp. japonica OX=39947 GN=ACLB-1 PE=2 SV=1;	PF00285.23;PF00549.21;PF13607.8;PF02629.21	Citrate_synt;Ligase_CoA;Succ_CoA_lig;CoA_binding	Citrate synthase, C-terminal domain;CoA-ligase;Succinyl-CoA ligase like flavodoxin domain;CoA binding domain
TraesCS3B02G221800	ACLY	26.48	18.1367	34.56	35.75	37.0033	31.8367	-	GO:0006629;GO:0006085;GO:0006633;GO:0005737;GO:0005829;GO:0046912;GO:0000166;GO:0003824;GO:000387	BP:lipid metabolic process;BP:acetyl-CoA biosynthetic process;BP:fatty acid biosynthetic process;CC:cytoplasm;CC:cytosol;MF:transferase activity, transferring acyl groups, acyl groups converted into alkyl on transfer;MF:nucleotide binding;MF:catalytic activity;MF:ATP citrate synthase activity;	K01648	ACLY	map00020	Citrate cycle (TCA cycle)	COG0074	C:Energy production and conversion	KAF7029387.1	hypothetical protein CFC21_041145 [Triticum aestivum]	sp|Q93VT8|ACLB1_ORYSJ;	ATP-citrate synthase beta chain protein 1 OS=Oryza sativa subsp. japonica OX=39947 GN=ACLB-1 PE=2 SV=1;	PF00285.23;PF00549.21;PF13607.8;PF02629.21	Citrate_synt;Ligase_CoA;Succ_CoA_lig;CoA_binding	Citrate synthase, C-terminal domain;CoA-ligase;Succinyl-CoA ligase like flavodoxin domain;CoA binding domain
TraesCS6A02G209600	IDH	14.1833	2.1	14.5067	3.74	16.7533	2.42	-	GO:0006099;GO:0006102;GO:0005739;GO:0004449;GO:001661	BP:tricarboxylic acid cycle;BP:isocitrate metabolic process;CC:mitochondrion;MF:isocitrate dehydrogenas;MF:oxidoreductase activity, acting on the CH-OH group of donors, NAD or NADP as acceptor;	K00030	IDH3	map00020	Citrate cycle (TCA cycle)	COG0473	E:Amino acid transport and metabolism	KAF7079275.1	hypothetical protein CFC21_083529 [Triticum aestivum]	sp|Q8LFC0|IDH1_ARATH;	Isocitrate dehydrogenase [NAD] regulatory subunit 1, mitochondrial OS=Arabidopsis thaliana OX=3702 GN=IDH1 PE=1 SV=2;	PF00180.22	Iso_dh	Isocitrate/isopropylmalate dehydrogenase
TraesCS6B02G440200	ACO	55.2967	18.9033	69.1767	32.0267	72.13	25.3433	Aconitate hydratase [Source:UniProtKB/TrEMBL;Acc:A0A1D6AQV8]	GO:0006099;GO:0006101;GO:0005829;GO:0005739;GO:0051539;GO:0047780;GO:0003994;GO:004687	BP:tricarboxylic acid cycle;BP:citrate metabolic process;CC:cytosol;CC:mitochondrion;MF:4 iron, 4 sulfur cluster binding;MF:citrate dehydratase activity;MF:aconitate hydratase activity;MF:metal ion binding;	K01681	ACO, acnA	map00020;map00630	Citrate cycle (TCA cycle);Glyoxylate and dicarboxylate metabolism	COG1048	C:Energy production and conversion	KAF7087049.1	hypothetical protein CFC21_090270 [Triticum aestivum]	sp|Q6YZX6|ACOC_ORYSJ;	Putative aconitate hydratase, cytoplasmic OS=Oryza sativa subsp. japonica OX=39947 GN=Os08g0191100 PE=3 SV=1;	PF00330.22;PF00694.21	Aconitase;Aconitase_C	Aconitase family;Aconitase C-terminal domain
TraesCS3A02G234800	MDH2	5.89	37.12	6.07	63.83	6.57667	58.1467	-	GO:0005975;GO:0019752;GO:0006099;GO:0006108;GO:0016615;GO:0016616;GO:0003824;GO:0030060;GO:001649	BP:carbohydrate metabolic process;BP:carboxylic acid metabolic process;BP:tricarboxylic acid cycle;BP:malate metabolic process;MF:malate dehydrogenase activity;MF:oxidoreductase activity, acting on the CH-OH group of donors, NAD or NADP as acceptor;MF:catalytic activity;MF:L-malate dehydrogenase activity;MF:oxidoreductase activity;	K00026	MDH2	map00020;map00630;map00620;map00710;map00270	Citrate cycle (TCA cycle);Glyoxylate and dicarboxylate metabolism;Pyruvate metabolism;Carbon fixation in photosynthetic organisms;Cysteine and methionine metabolism	COG0039	C:Energy production and conversion	XP_037406066.1	malate dehydrogenase 1, mitochondrial-like [Triticum dicoccoides]	sp|Q9ZP06|MDHM1_ARATH;	Malate dehydrogenase 1, mitochondrial OS=Arabidopsis thaliana OX=3702 GN=At1g53240 PE=1 SV=1;	PF00056.25;PF02866.20;PF01073.21	Ldh_1_N;Ldh_1_C;3Beta_HSD	lactate/malate dehydrogenase, NAD binding domain;lactate/malate dehydrogenase, alpha/beta C-terminal domain;3-beta hydroxysteroid dehydrogenase/isomerase family
TraesCS2D02G255500	SDH	0.63	0.96	0.763333	1.67667	0.54	1.67333	Succinate dehydrogenase [ubiquinone] flavoprotein subunit, mitochondrial [Source:UniProtKB/TrEMBL;Acc:A0A1D5UIU6]	GO:0006121;GO:0006099;GO:0022900;GO:0045273;GO:0005749;GO:0016020;GO:0005743;GO:0016491;GO:0016627;GO:0008177;GO:0000104;GO:0050660;GO:000905	BP:mitochondrial electron transport, succinate to ubiquinone;BP:tricarboxylic acid cycle;BP:electron transport chain;CC:respiratory chain complex II;CC:mitochondrial respiratory chain complex II, succinate dehydrogenase comple;CC:membrane;CC:mitochondrial inner membrane;MF:oxidoreductase activity;MF:oxidoreductase activity, acting on the CH-CH group of donors;MF:succinate dehydrogenas;MF:succinat…	K00234	SDHA, SDH1	map00020;map00190	Citrate cycle (TCA cycle);Oxidative phosphorylation	COG1053	C:Energy production and conversion	XP_020172381.1	succinate dehydrogenase [ubiquinone] flavoprotein subunit, mitochondrial [Aegilops tauschii subsp. strangulata]	sp|Q6ZDY8|SDHA_ORYSJ;	Succinate dehydrogenase [ubiquinone] flavoprotein subunit, mitochondrial OS=Oryza sativa subsp. japonica OX=39947 GN=SDH1 PE=1 SV=1;	PF00890.26;PF02910.22;PF07992.16;PF01134.24	FAD_binding_2;Succ_DH_flav_C;Pyr_redox_2;GIDA	FAD binding domain;Fumarate reductase flavoprotein C-term;Pyridine nucleotide-disulphide oxidoreductase;Glucose inhibited division protein A
TraesCS4D02G170200	FUM	15.0533	10.9167	18.3433	23.1767	21.59	19.6233	-	GO:0006099;GO:0006106;GO:0006108;GO:0005739;GO:0045239;GO:0016829;GO:0004333;GO:000382	BP:tricarboxylic acid cycle;BP:fumarate metabolic process;BP:malate metabolic process;CC:mitochondrion;CC:tricarboxylic acid cycle enzyme complex;MF:lyase activity;MF:fumarate hydratase activity;MF:catalytic activity;	K01679	E4.2.1.2B, fumC, FH	map00020;map00620	Citrate cycle (TCA cycle);Pyruvate metabolism	COG0114	C:Energy production and conversion	XP_020170271.1	fumarate hydratase 1, mitochondrial [Aegilops tauschii subsp. strangulata]	sp|P93033|FUM1_ARATH;	Fumarate hydratase 1, mitochondrial OS=Arabidopsis thaliana OX=3702 GN=FUM1 PE=1 SV=2;	PF00206.22;PF10415.11	Lyase_1;FumaraseC_C	Lyase;Fumarase C C-terminus
TraesCS3D02G383700	ALDO	84.15	77.16	118.317	179.953	160.14	143.84	Fructose-bisphosphate aldolase [Source:UniProtKB/TrEMBL;Acc:A0A1D5WIS4]	GO:0030388;GO:0006096;GO:0005829;GO:0003824;GO:0004332;GO:001682	BP:fructose 1,6-bisphosphate metabolic process;BP:glycolytic process;CC:cytosol;MF:catalytic activity;MF:fructose-bisphosphate aldolase activity;MF:lyase activity;	K01623	ALDO	map00010;map00030;map00051;map00710	Glycolysis / Gluconeogenesis;Pentose phosphate pathway;Fructose and mannose metabolism;Carbon fixation in photosynthetic organisms	COG3588	G:Carbohydrate transport and metabolism	AVL25147.1	fructose-1,6-bisphosphate aldolase 15 [Triticum aestivum]	sp|P17784|ALFC1_ORYSJ;	Fructose-bisphosphate aldolase 1, cytoplasmic OS=Oryza sativa subsp. japonica OX=39947 GN=FBA1 PE=1 SV=2;	PF00274.21	Glycolytic	Fructose-bisphosphate aldolase class-I
TraesCS3B02G422900	ALDO	136.66	126.323	179.863	241.127	223.957	211.957	-	GO:0030388;GO:0006096;GO:0005829;GO:0003824;GO:000433	BP:fructose 1,6-bisphosphate metabolic process;BP:glycolytic process;CC:cytosol;MF:catalytic activity;MF:fructose-bisphosphate aldolase activity;	K01623	ALDO	map00010;map00030;map00051;map00710	Glycolysis / Gluconeogenesis;Pentose phosphate pathway;Fructose and mannose metabolism;Carbon fixation in photosynthetic organisms	COG3588	G:Carbohydrate transport and metabolism	KAF7031903.1	hypothetical protein CFC21_043153 [Triticum aestivum]	sp|P17784|ALFC1_ORYSJ;	Fructose-bisphosphate aldolase 1, cytoplasmic OS=Oryza sativa subsp. japonica OX=39947 GN=FBA1 PE=1 SV=2;	PF00274.21	Glycolytic	Fructose-bisphosphate aldolase class-I
TraesCS3B02G025200	ALDO	29.06	3.32333	40.8833	3.93667	44.7133	4.69333	-	GO:0030388;GO:0006096;GO:0005829;GO:0003824;GO:000433	BP:fructose 1,6-bisphosphate metabolic process;BP:glycolytic process;CC:cytosol;MF:catalytic activity;MF:fructose-bisphosphate aldolase activity;	K01623	ALDO	map00010;map00030;map00051;map00710	Glycolysis / Gluconeogenesis;Pentose phosphate pathway;Fructose and mannose metabolism;Carbon fixation in photosynthetic organisms	COG3588	G:Carbohydrate transport and metabolism	VAH71151.1	unnamed protein product [Triticum turgidum subsp. durum]	sp|Q9ZU52|ALFP3_ARATH;	Fructose-bisphosphate aldolase 3, chloroplastic OS=Arabidopsis thaliana OX=3702 GN=FBA3 PE=1 SV=1;	PF00274.21	Glycolytic	Fructose-bisphosphate aldolase class-I
TraesCS7B02G234400	GAPDH	0.13	2.03667	0.14	1.49333	0.136667	1.82	-	GO:0006006;GO:0006096;GO:0005829;GO:0004365;GO:0051287;GO:0016620;GO:005066	BP:glucose metabolic process;BP:glycolytic process;CC:cytosol;MF:glyceraldehyde-3-phosphate dehydrogenas;MF:NAD binding;MF:oxidoreductase activity, acting on the aldehyde or oxo group of donors, NAD or NADP as acceptor;MF:NADP binding;	K00134	GAPDH, gapA	map00010;map00710	Glycolysis / Gluconeogenesis;Carbon fixation in photosynthetic organisms	COG0057	G:Carbohydrate transport and metabolism	KAF7102311.1	hypothetical protein CFC21_103468 [Triticum aestivum]	sp|Q7FAH2|G3PC2_ORYSJ;	Glyceraldehyde-3-phosphate dehydrogenase 2, cytosolic OS=Oryza sativa subsp. japonica OX=39947 GN=GAPC2 PE=1 SV=1;	PF02800.22;PF00044.26;PF01113.22	Gp_dh_C;Gp_dh_N;DapB_N	Glyceraldehyde 3-phosphate dehydrogenase, C-terminal domain;Glyceraldehyde 3-phosphate dehydrogenase, NAD binding domain;Dihydrodipicolinate reductase, N-terminus
TraesCS6B02G331600	PGAM	7.04333	5.86333	7.67	14.8467	7.40667	10.4167	-	GO:0006096;GO:0005634;GO:0000786;GO:0016868;GO:0003824;GO:0003677;GO:0004619;GO:004698	BP:glycolytic process;CC:nucleus;CC:nucleosome;MF:intramolecular transferase activity, phosphotransferases;MF:catalytic activity;MF:DNA binding;MF:phosphoglycerate mutase activity;MF:protein heterodimerization activity;	K01834	PGAM, gpmA	map00010;map00260	Glycolysis / Gluconeogenesis;Glycine, serine and threonine metabolism	COG0588	G:Carbohydrate transport and metabolism	KAF7080334.1	hypothetical protein CFC21_084430 [Triticum aestivum]	sp|Q9LM13|GPMA1_ARATH;	2,3-bisphosphoglycerate-dependent phosphoglycerate mutase 1 OS=Arabidopsis thaliana OX=3702 GN=gpmA1 PE=2 SV=1;	PF00300.24	His_Phos_1	Histidine phosphatase superfamily
TraesCS6A02G279100	PFP	45.23	40.7867	62.2433	79.6533	72.1367	67.4267	Pyrophosphate--fructose 6-phosphate 1-phosphotransferase subunit alpha [Source:UniProtKB/TrEMBL;Acc:A0A341WIV4]	GO:0009749;GO:0015979;GO:0006096;GO:0006002;GO:0005737;GO:0005829;GO:0047334;GO:0005524;GO:0003872;GO:0046872;GO:000844	BP:response to glucose;BP:photosynthesis;BP:glycolytic process;BP:fructose 6-phosphate metabolic process;CC:cytoplasm;CC:cytosol;MF:diphosphate-fructose-6-phosphate 1-phosphotransferase activity;MF:ATP binding;MF:6-phosphofructokinase activity;MF:metal ion binding;MF:phosphofructokinase activity;	K00895	pfp, PFP	map00010;map00030;map00051	Glycolysis / Gluconeogenesis;Pentose phosphate pathway;Fructose and mannose metabolism	COG0205	G:Carbohydrate transport and metabolism	VAI60082.1	unnamed protein product [Triticum turgidum subsp. durum]	sp|Q41140|PFPA_RICCO;	Pyrophosphate--fructose 6-phosphate 1-phosphotransferase subunit alpha OS=Ricinus communis OX=3988 GN=PFP-ALPHA PE=3 SV=1;	PF00365.22	PFK	Phosphofructokinase
TraesCS5A02G072700	PFP	5.05667	8.90333	11.3533	25.6633	11.6533	21.8267	Pyrophosphate--fructose 6-phosphate 1-phosphotransferase subunit alpha [Source:UniProtKB/TrEMBL;Acc:A0A1D5YUK3]	GO:0006002;GO:0006096;GO:0005737;GO:0047334;GO:0003872;GO:0046872;GO:000552	BP:fructose 6-phosphate metabolic process;BP:glycolytic process;CC:cytoplasm;MF:diphosphate-fructose-6-phosphate 1-phosphotransferase activity;MF:6-phosphofructokinase activity;MF:metal ion binding;MF:ATP binding;	K00895	pfp, PFP	map00010;map00030;map00051	Glycolysis / Gluconeogenesis;Pentose phosphate pathway;Fructose and mannose metabolism	COG0205	G:Carbohydrate transport and metabolism	XP_037432647.1	pyrophosphate--fructose 6-phosphate 1-phosphotransferase subunit alpha-like [Triticum dicoccoides]	sp|Q41140|PFPA_RICCO;	Pyrophosphate--fructose 6-phosphate 1-phosphotransferase subunit alpha OS=Ricinus communis OX=3988 GN=PFP-ALPHA PE=3 SV=1;	PF00365.22	PFK	Phosphofructokinase
TraesCS1A02G273900	FBP	15.4133	12.8033	17.15	5.98667	13.4233	8.2	-	GO:0030388;GO:0005986;GO:0005975;GO:0006000;GO:0006002;GO:0006094;GO:0005737;GO:0005829;GO:0042132;GO:0016791;GO:0042578;GO:004687	BP:fructose 1,6-bisphosphate metabolic process;BP:sucrose biosynthetic process;BP:carbohydrate metabolic process;BP:fructose metabolic process;BP:fructose 6-phosphate metabolic process;BP:gluconeogenesis;CC:cytoplasm;CC:cytosol;MF:fructose 1,6-bisphosphate 1-phosphatase activity;MF:phosphatase activity;MF:phosphoric ester hydrolase activity;MF:metal ion binding;	K03841	FBP, fbp	map00010;map00030;map00051;map00710	Glycolysis / Gluconeogenesis;Pentose phosphate pathway;Fructose and mannose metabolism;Carbon fixation in photosynthetic organisms	COG0158	G:Carbohydrate transport and metabolism	XP_037417569.1	fructose-1,6-bisphosphatase, cytosolic-like [Triticum dicoccoides]	sp|Q9SDL8|F16P2_ORYCO;	Fructose-1,6-bisphosphatase, cytosolic OS=Oryza coarctata OX=77588 PE=2 SV=1;	PF00316.22;PF18913.2	FBPase;FBPase_C	Fructose-1-6-bisphosphatase, N-terminal domain;Fructose-1-6-bisphosphatase, C-terminal domain
TraesCS7D02G460700	PGK	3.22333	5.31667	3.23667	2.47	3.23	3.83	Phosphoglycerate kinase [Source:UniProtKB/TrEMBL;Acc:A0A1D6CST5]	GO:0006096;GO:0006094;GO:0005829;GO:0043531;GO:0004618;GO:000552	BP:glycolytic process;BP:gluconeogenesis;CC:cytosol;MF:ADP binding;MF:phosphoglycerate kinase activity;MF:ATP binding;	K00927	PGK, pgk	map00010;map00710	Glycolysis / Gluconeogenesis;Carbon fixation in photosynthetic organisms	COG0126	G:Carbohydrate transport and metabolism	XP_020178477.2	phosphoglycerate kinase, cytosolic [Aegilops tauschii subsp. strangulata]	sp|P12783|PGKY_WHEAT;	Phosphoglycerate kinase, cytosolic OS=Triticum aestivum OX=4565 PE=2 SV=1;	PF00162.21	PGK	Phosphoglycerate kinase
TraesCS7B02G375300	PGK	1.14667	6.66	0.69	6.72667	0.706667	6.99667	Phosphoglycerate kinase [Source:UniProtKB/TrEMBL;Acc:A0A1D6C5J1]	GO:0006096;GO:0006094;GO:0005829;GO:0043531;GO:0004618;GO:000552	BP:glycolytic process;BP:gluconeogenesis;CC:cytosol;MF:ADP binding;MF:phosphoglycerate kinase activity;MF:ATP binding;	K00927	PGK, pgk	map00010;map00710	Glycolysis / Gluconeogenesis;Carbon fixation in photosynthetic organisms	COG0126	G:Carbohydrate transport and metabolism	KAF7103993.1	hypothetical protein CFC21_104922 [Triticum aestivum]	sp|P12783|PGKY_WHEAT;	Phosphoglycerate kinase, cytosolic OS=Triticum aestivum OX=4565 PE=2 SV=1;	PF00162.21	PGK	Phosphoglycerate kinase
TraesCS1D02G252900	PPDK	4.32333	4.84	9.77667	4.95333	4.57333	7.50333	Pyruvate, phosphate dikinase [Source:UniProtKB/TrEMBL;Acc:A0A1D6D8L9]	GO:0016310;GO:0006090;GO:0009570;GO:0005634;GO:0005829;GO:0046872;GO:0016301;GO:0003824;GO:0016772;GO:0005524;GO:005024	BP:phosphorylation;BP:pyruvate metabolic process;CC:chloroplast stroma;CC:nucleus;CC:cytosol;MF:metal ion binding;MF:kinase activity;MF:catalytic activity;MF:transferase activity, transferring phosphorus-containing groups;MF:ATP binding;MF:pyruvate, phosphate dikinase activity;	K01006	ppdK	map00010;map00620;map00710	Glycolysis / Gluconeogenesis;Pyruvate metabolism;Carbon fixation in photosynthetic organisms	COG0574	G:Carbohydrate transport and metabolism	XP_020188364.1	pyruvate, phosphate dikinase 2 [Aegilops tauschii subsp. strangulata]	sp|Q6AVA8|PPDK1_ORYSJ;	Pyruvate, phosphate dikinase 1, chloroplastic OS=Oryza sativa subsp. japonica OX=39947 GN=PPDK1 PE=1 SV=1;	PF02896.20;PF01326.21;PF00391.25	PEP-utilizers_C;PPDK_N;PEP-utilizers	PEP-utilising enzyme, PEP-binding domain;Pyruvate phosphate dikinase, AMP/ATP-binding domain;PEP-utilising enzyme, mobile domain
TraesCS1A02G253400	PPDK	11.6967	9.83333	19.24	26.7933	19.5733	25.48	Pyruvate, phosphate dikinase [Source:UniProtKB/TrEMBL;Acc:A0A1D5RX10]	GO:0016310;GO:0006090;GO:0046872;GO:0016772;GO:0016301;GO:0003824;GO:0005524;GO:005024	BP:phosphorylation;BP:pyruvate metabolic process;MF:metal ion binding;MF:transferase activity, transferring phosphorus-containing groups;MF:kinase activity;MF:catalytic activity;MF:ATP binding;MF:pyruvate, phosphate dikinase activity;	K01006	ppdK	map00010;map00620;map00710	Glycolysis / Gluconeogenesis;Pyruvate metabolism;Carbon fixation in photosynthetic organisms	COG0574	G:Carbohydrate transport and metabolism	XP_037416051.1	pyruvate, phosphate dikinase 2-like isoform X1 [Triticum dicoccoides]	sp|Q6AVA8|PPDK1_ORYSJ;	Pyruvate, phosphate dikinase 1, chloroplastic OS=Oryza sativa subsp. japonica OX=39947 GN=PPDK1 PE=1 SV=1;	PF02896.20;PF01326.21;PF00391.25	PEP-utilizers_C;PPDK_N;PEP-utilizers	PEP-utilising enzyme, PEP-binding domain;Pyruvate phosphate dikinase, AMP/ATP-binding domain;PEP-utilising enzyme, mobile domain
TraesCS6D02G281100	TPP	0.9	1.11	1.68	2.67	1.21667	2.54333	Trehalose 6-phosphate phosphatase [Source:UniProtKB/TrEMBL;Acc:A0A1D6B9H6]	GO:0005992;GO:0003824;GO:000480	BP:trehalose biosynthetic process;MF:catalytic activity;MF:trehalose-phosphatase activity;	K01087	otsB	map00500	Starch and sucrose metabolism	COG1877	G:Carbohydrate transport and metabolism	XP_037448208.1	probable trehalose-phosphate phosphatase 4 [Triticum dicoccoides]	sp|Q6ZGP8|TPP4_ORYSJ;	Probable trehalose-phosphate phosphatase 4 OS=Oryza sativa subsp. japonica OX=39947 GN=TPP4 PE=2 SV=1;	PF02358.18	Trehalose_PPase	Trehalose-phosphatase
TraesCS6D02G230500	TPP	5.84	4.63667	5.86667	10.0733	9.68667	8.17333	Trehalose 6-phosphate phosphatase [Source:UniProtKB/TrEMBL;Acc:W5GXR8]	GO:0009409;GO:0009651;GO:0005992;GO:0003824;GO:000480	BP:response to cold;BP:response to salt stress;BP:trehalose biosynthetic process;MF:catalytic activity;MF:trehalose-phosphatase activity;	K01087	otsB	map00500	Starch and sucrose metabolism	COG1877	G:Carbohydrate transport and metabolism	XP_020178453.1	probable trehalose-phosphate phosphatase 1 isoform X1 [Aegilops tauschii subsp. strangulata]	sp|Q75WV3|TPP1_ORYSJ;	Probable trehalose-phosphate phosphatase 1 OS=Oryza sativa subsp. japonica OX=39947 GN=TPP1 PE=1 SV=1;	PF02358.18	Trehalose_PPase	Trehalose-phosphatase
TraesCS6A02G301800	TPP	1.38333	3.11333	1.51667	4.33667	0.966667	4.61333	Trehalose 6-phosphate phosphatase [Source:UniProtKB/TrEMBL;Acc:A0A1D6A653]	GO:0005992;GO:0003824;GO:000480	BP:trehalose biosynthetic process;MF:catalytic activity;MF:trehalose-phosphatase activity;	K01087	otsB	map00500	Starch and sucrose metabolism	COG1877	G:Carbohydrate transport and metabolism	XP_037448208.1	probable trehalose-phosphate phosphatase 4 [Triticum dicoccoides]	sp|Q6ZGP8|TPP4_ORYSJ;	Probable trehalose-phosphate phosphatase 4 OS=Oryza sativa subsp. japonica OX=39947 GN=TPP4 PE=2 SV=1;	PF02358.18	Trehalose_PPase	Trehalose-phosphatase
TraesCS5D02G200800	TPP	9.17667	12.7267	4.28333	7.50667	5.78333	8.29	Trehalose 6-phosphate phosphatase [Source:UniProtKB/TrEMBL;Acc:A0A0C4BJY4]	GO:0005992;GO:0003824;GO:000480	BP:trehalose biosynthetic process;MF:catalytic activity;MF:trehalose-phosphatase activity;	K01087	otsB	map00500	Starch and sucrose metabolism	COG1877	G:Carbohydrate transport and metabolism	XP_020190227.1	probable trehalose-phosphate phosphatase 7 [Aegilops tauschii subsp. strangulata]	sp|Q6H5L4|TPP7_ORYSJ;	Probable trehalose-phosphate phosphatase 7 OS=Oryza sativa subsp. japonica OX=39947 GN=TPP7 PE=2 SV=2;	PF02358.18	Trehalose_PPase	Trehalose-phosphatase
TraesCS5A02G190000	TPP	12.4467	25.8633	8.92333	9.3	7.16667	12.9633	Trehalose 6-phosphate phosphatase [Source:UniProtKB/TrEMBL;Acc:A0A1D5YB76]	GO:0005992;GO:0003824;GO:000480	BP:trehalose biosynthetic process;MF:catalytic activity;MF:trehalose-phosphatase activity;	K01087	otsB	map00500	Starch and sucrose metabolism	COG1877	G:Carbohydrate transport and metabolism	XP_037434280.1	probable trehalose-phosphate phosphatase 7 [Triticum dicoccoides]	sp|Q6H5L4|TPP7_ORYSJ;	Probable trehalose-phosphate phosphatase 7 OS=Oryza sativa subsp. japonica OX=39947 GN=TPP7 PE=2 SV=2;	PF02358.18	Trehalose_PPase	Trehalose-phosphatase
TraesCS2B02G187100	TPP	0.183333	0.666667	0.27	1.66	0.553333	2.08	Trehalose 6-phosphate phosphatase [Source:UniProtKB/TrEMBL;Acc:W5BMP2]	GO:0005992;GO:0003824;GO:000480	BP:trehalose biosynthetic process;MF:catalytic activity;MF:trehalose-phosphatase activity;	K01087	otsB	map00500	Starch and sucrose metabolism	COG1877	G:Carbohydrate transport and metabolism	XP_037484084.1	trehalose 6-phosphate phosphatase RA3-like [Triticum dicoccoides]	sp|Q1W5S8|TPRA3_MAIZE;	Trehalose 6-phosphate phosphatase RA3 OS=Zea mays OX=4577 GN=RA3 PE=1 SV=1;	PF02358.18	Trehalose_PPase	Trehalose-phosphatase
TraesCS2A02G161100	TPP	0.44	1.37333	0.686667	1.34	0.46	1.65	Trehalose 6-phosphate phosphatase [Source:UniProtKB/TrEMBL;Acc:A0A1D5RSQ2]	GO:0005992;GO:0003824;GO:000480	BP:trehalose biosynthetic process;MF:catalytic activity;MF:trehalose-phosphatase activity;	K01087	otsB	map00500	Starch and sucrose metabolism	COG1877	G:Carbohydrate transport and metabolism	XP_037476290.1	trehalose 6-phosphate phosphatase RA3-like [Triticum dicoccoides]	sp|Q1W5S8|TPRA3_MAIZE;	Trehalose 6-phosphate phosphatase RA3 OS=Zea mays OX=4577 GN=RA3 PE=1 SV=1;	PF02358.18	Trehalose_PPase	Trehalose-phosphatase
TraesCS1D02G213700	TPP	7.30333	2.46667	6.77333	4.83667	7.46333	6.52	Trehalose 6-phosphate phosphatase [Source:UniProtKB/TrEMBL;Acc:W5ADC4]	GO:0005992;GO:0016021;GO:0003824;GO:000480	BP:trehalose biosynthetic process;CC:integral component of membrane;MF:catalytic activity;MF:trehalose-phosphatase activity;	K01087	otsB	map00500	Starch and sucrose metabolism	COG1877	G:Carbohydrate transport and metabolism	VAH06121.1	unnamed protein product [Triticum turgidum subsp. durum]	sp|Q9FWQ2|TPP2_ORYSJ;	Probable trehalose-phosphate phosphatase 2 OS=Oryza sativa subsp. japonica OX=39947 GN=TPP2 PE=1 SV=1;	PF02358.18	Trehalose_PPase	Trehalose-phosphatase
TraesCS7D02G036600	SUS	13.3	9.20667	21.7033	31.5367	32.58	22.2533	Sucrose synthase [Source:UniProtKB/TrEMBL;Acc:A0A1D6D1F6]	GO:0010037;GO:0005985;GO:0016157;GO:001675	BP:response to carbon dioxide;BP:sucrose metabolic process;MF:sucrose synthase activity;MF:transferase activity, transferring glycosyl groups;	K00695	SUS	map00500	Starch and sucrose metabolism	COG0438	M:Cell wall/membrane/envelope biogenesis	XP_020193399.1	sucrose synthase 1 [Aegilops tauschii subsp. strangulata]	sp|P31924|SUS1_ORYSJ;	Sucrose synthase 1 OS=Oryza sativa subsp. japonica OX=39947 GN=SUS1 PE=1 SV=1;	PF00862.21;PF00534.22;PF13692.8	Sucrose_synth;Glycos_transf_1;Glyco_trans_1_4	Sucrose synthase;Glycosyl transferases group 1;Glycosyl transferases group 1
TraesCS7A02G040900	SUS	12.25	3.63667	10.2933	17.0167	20.16	11.82	Sucrose synthase [Source:UniProtKB/TrEMBL;Acc:A0A1D6SCP9]	GO:0010037;GO:0005985;GO:0016740;GO:0016157;GO:001675	BP:response to carbon dioxide;BP:sucrose metabolic process;MF:transferase activity;MF:sucrose synthase activity;MF:transferase activity, transferring glycosyl groups;	K00695	SUS	map00500	Starch and sucrose metabolism	COG0438	M:Cell wall/membrane/envelope biogenesis	KAF7046253.1	hypothetical protein CFC21_055294 [Triticum aestivum]	sp|P31924|SUS1_ORYSJ;	Sucrose synthase 1 OS=Oryza sativa subsp. japonica OX=39947 GN=SUS1 PE=1 SV=1;	PF00862.21;PF00534.22;PF13692.8	Sucrose_synth;Glycos_transf_1;Glyco_trans_1_4	Sucrose synthase;Glycosyl transferases group 1;Glycosyl transferases group 1
TraesCS6B02G466600	SUS	2.31667	7.42	0.966667	0.913333	2.44667	4.15667	Sucrose synthase [Source:UniProtKB/TrEMBL;Acc:A0A1D6AKV9]	GO:0005985;GO:0016157;GO:001675	BP:sucrose metabolic process;MF:sucrose synthase activity;MF:transferase activity, transferring glycosyl groups;	K00695	SUS	map00500	Starch and sucrose metabolism	COG0438	M:Cell wall/membrane/envelope biogenesis	KAF7087369.1	hypothetical protein CFC21_090566 [Triticum aestivum]	sp|Q7XNX6|SUS7_ORYSJ;	Sucrose synthase 7 OS=Oryza sativa subsp. japonica OX=39947 GN=SUS7 PE=2 SV=2;	PF00862.21;PF00534.22;PF13692.8;PF13524.8	Sucrose_synth;Glycos_transf_1;Glyco_trans_1_4;Glyco_trans_1_2	Sucrose synthase;Glycosyl transferases group 1;Glycosyl transferases group 1;Glycosyl transferases group 1
TraesCS4D02G169800	SUS	2.87	1.97667	2.29	0.89	0.97	1.19333	Sucrose synthase [Source:UniProtKB/TrEMBL;Acc:A0A341UU53]	GO:0005982;GO:0005985;GO:0010555;GO:0009414;GO:0010431;GO:0016157;GO:001675	BP:starch metabolic process;BP:sucrose metabolic process;BP:response to mannitol;BP:response to water deprivation;BP:seed maturation;MF:sucrose synthase activity;MF:transferase activity, transferring glycosyl groups;	K00695	SUS	map00500	Starch and sucrose metabolism	COG0438	M:Cell wall/membrane/envelope biogenesis	XP_020155293.1	sucrose synthase 4 [Aegilops tauschii subsp. strangulata]	sp|Q10LP5|SUS4_ORYSJ;	Sucrose synthase 4 OS=Oryza sativa subsp. japonica OX=39947 GN=SUS4 PE=2 SV=1;	PF00862.21;PF00534.22;PF13692.8	Sucrose_synth;Glycos_transf_1;Glyco_trans_1_4	Sucrose synthase;Glycosyl transferases group 1;Glycosyl transferases group 1
TraesCS4B02G167500	SUS	2.11	0.616667	1.96333	0.686667	1.8	0.813333	Sucrose synthase [Source:UniProtKB/TrEMBL;Acc:A0A341UCN4]	GO:0005982;GO:0005985;GO:0010555;GO:0009414;GO:0010431;GO:0016157;GO:001675	BP:starch metabolic process;BP:sucrose metabolic process;BP:response to mannitol;BP:response to water deprivation;BP:seed maturation;MF:sucrose synthase activity;MF:transferase activity, transferring glycosyl groups;	K00695	SUS	map00500	Starch and sucrose metabolism	COG0438	M:Cell wall/membrane/envelope biogenesis	KAF7049034.1	hypothetical protein CFC21_057652 [Triticum aestivum]	sp|Q10LP5|SUS4_ORYSJ;	Sucrose synthase 4 OS=Oryza sativa subsp. japonica OX=39947 GN=SUS4 PE=2 SV=1;	PF00862.21;PF00534.22;PF13692.8	Sucrose_synth;Glycos_transf_1;Glyco_trans_1_4	Sucrose synthase;Glycosyl transferases group 1;Glycosyl transferases group 1
TraesCS4A02G446700	SUS	8.81333	6.41333	13.2567	19.34	17.7267	11.5733	Sucrose synthase [Source:UniProtKB/TrEMBL;Acc:A0A1D6SCP9]	GO:0010037;GO:0005985;GO:0016740;GO:0016157;GO:001675	BP:response to carbon dioxide;BP:sucrose metabolic process;MF:transferase activity;MF:sucrose synthase activity;MF:transferase activity, transferring glycosyl groups;	K00695	SUS	map00500	Starch and sucrose metabolism	COG0438	M:Cell wall/membrane/envelope biogenesis	KAF7046253.1	hypothetical protein CFC21_055294 [Triticum aestivum]	sp|P31924|SUS1_ORYSJ;	Sucrose synthase 1 OS=Oryza sativa subsp. japonica OX=39947 GN=SUS1 PE=1 SV=1;	PF00862.21;PF00534.22;PF13692.8	Sucrose_synth;Glycos_transf_1;Glyco_trans_1_4	Sucrose synthase;Glycosyl transferases group 1;Glycosyl transferases group 1
TraesCS6D02G334000	TPS	164.94	144.97	122.91	80.4033	116.57	69.7833	Probable alpha,alpha-trehalose-phosphate synthase [UDP-forming] 11 [Source:Projected from Arabidopsis thaliana (AT2G18700) UniProtKB/Swiss-Prot;Acc:Q9ZV48]	GO:0005992;GO:0005829;GO:0005739;GO:0003824;GO:000480	BP:trehalose biosynthetic process;CC:cytosol;CC:mitochondrion;MF:catalytic activity;MF:trehalose-phosphatase activity;	K16055	TPS	map00500	Starch and sucrose metabolism	COG1877	G:Carbohydrate transport and metabolism	XP_020195026.1	probable alpha,alpha-trehalose-phosphate synthase [UDP-forming] 11 [Aegilops tauschii subsp. strangulata]	sp|Q9ZV48|TPS11_ARATH;	Probable alpha,alpha-trehalose-phosphate synthase [UDP-forming] 11 OS=Arabidopsis thaliana OX=3702 GN=TPS11 PE=2 SV=1;	PF00982.23;PF02358.18;PF08282.14	Glyco_transf_20;Trehalose_PPase;Hydrolase_3	Glycosyltransferase family 20;Trehalose-phosphatase;haloacid dehalogenase-like hydrolase
TraesCS5A02G203500	TPS	62.6633	70.3333	41.72	28.9167	34.4267	30.8033	-	GO:0005992;GO:0005829;GO:0003824;GO:0016757;GO:000480	BP:trehalose biosynthetic process;CC:cytosol;MF:catalytic activity;MF:transferase activity, transferring glycosyl groups;MF:trehalose-phosphatase activity;	K16055	TPS	map00500	Starch and sucrose metabolism	COG1877	G:Carbohydrate transport and metabolism	XP_037434371.1	alpha,alpha-trehalose-phosphate synthase [UDP-forming] 6-like [Triticum dicoccoides]	sp|Q94AH8|TPS6_ARATH;	Alpha,alpha-trehalose-phosphate synthase [UDP-forming] 6 OS=Arabidopsis thaliana OX=3702 GN=TPS6 PE=1 SV=2;	PF00982.23;PF02358.18;PF08282.14	Glyco_transf_20;Trehalose_PPase;Hydrolase_3	Glycosyltransferase family 20;Trehalose-phosphatase;haloacid dehalogenase-like hydrolase
TraesCS1D02G065300	TPS	0.573333	2.93667	0.29	2.58333	0.386667	2.50333	-	GO:0005992;GO:0003825;GO:000382	BP:trehalose biosynthetic process;MF:alpha,alpha-trehalose-phosphate synthas;MF:catalytic activity;	K16055	TPS	map00500	Starch and sucrose metabolism	COG1877	G:Carbohydrate transport and metabolism	XP_040254046.1	alpha,alpha-trehalose-phosphate synthase [UDP-forming] 1 isoform X1 [Aegilops tauschii subsp. strangulata]	sp|Q9SYM4|TPS1_ARATH;	Alpha,alpha-trehalose-phosphate synthase [UDP-forming] 1 OS=Arabidopsis thaliana OX=3702 GN=TPS1 PE=1 SV=1;	PF02358.18;PF00982.23	Trehalose_PPase;Glyco_transf_20	Trehalose-phosphatase;Glycosyltransferase family 20
TraesCS2D02G293200	INV	2.30333	1.45333	2.03667	0.54	0.983333	0.963333	-	GO:0005975;GO:0052576;GO:0050832;GO:0008152;GO:0042742;GO:0016787;GO:0016798;GO:0004564;GO:000455	BP:carbohydrate metabolic process;BP:carbohydrate storage;BP:defense response to fungus;BP:metabolic process;BP:defense response to bacterium;MF:hydrolase activity;MF:hydrolase activity, acting on glycosyl bonds;MF:beta-fructofuranosidase activity;MF:hydrolase activity, hydrolyzing O-glycosyl compounds;	K01193	INV, sacA	map00500;map00052	Starch and sucrose metabolism;Galactose metabolism	COG1621	G:Carbohydrate transport and metabolism	KAF7016433.1	hypothetical protein CFC21_030045 [Triticum aestivum]	sp|Q01IS7|INV2_ORYSI;	Beta-fructofuranosidase, insoluble isoenzyme 2 OS=Oryza sativa subsp. indica OX=39946 GN=CIN2 PE=2 SV=2;	PF00251.22;PF08244.14	Glyco_hydro_32N;Glyco_hydro_32C	Glycosyl hydrolases family 32 N-terminal domain;Glycosyl hydrolases family 32 C terminal
TraesCS2B02G311900	INV	1.19333	0.793333	0.453333	0.476667	0.42	0.716667	-	GO:0005975;GO:0052576;GO:0050832;GO:0042742;GO:0004564;GO:000455	BP:carbohydrate metabolic process;BP:carbohydrate storage;BP:defense response to fungus;BP:defense response to bacterium;MF:beta-fructofuranosidase activity;MF:hydrolase activity, hydrolyzing O-glycosyl compounds;	K01193	INV, sacA	map00500;map00052	Starch and sucrose metabolism;Galactose metabolism	COG1621	G:Carbohydrate transport and metabolism	KAF7009117.1	hypothetical protein CFC21_023713 [Triticum aestivum]	sp|Q01IS7|INV2_ORYSI;	Beta-fructofuranosidase, insoluble isoenzyme 2 OS=Oryza sativa subsp. indica OX=39946 GN=CIN2 PE=2 SV=2;	PF00251.22;PF08244.14	Glyco_hydro_32N;Glyco_hydro_32C	Glycosyl hydrolases family 32 N-terminal domain;Glycosyl hydrolases family 32 C terminal
