# Supplementary material for: Exploration of the Commonalities and Specificities in Wheat Respond to Aluminum Toxicity and Low Phosphorus via Transcriptomics and Targeted Metabolomics Study
Source: Preprints.org preprint supplement (doi:10.20944/preprints202408.0689.v1), 2024-08-12
Supplement: Supplementary file 8 [file Table S8. Effects of Al and LP interactions on mean concentrations of flavonoids in two genotypes wheat roots.xlsx]

## Sheet: Table S8
Table S8. Effects of Al and LP interactions on mean (±SE, n = 3) concentrations (μg·g-1 FW) of flavonoids in two genotypes wheat roots.
Metabolite	Fielder CK	Fielder Al	Fielder LP	Ardito CK	Ardito Al	Ardito LP
Apigenin	2.01±0.03b	1.98±0.28b	2.33±0.37b	3.33±0.42a	2.23±0.47b	3.72±0.31a
Dihydrokaempferol	0.34±0.01a	0.31±0.04a	0.33±0.03a	0.34±0.02a	0.24±0.05b	0.21±0.03b
Epigallocatechin	1.71±0.37d	5.89±0.59b	2.23±0.3d	11.08±0.76a	5.65±0.54b	3.97±0.45c
Gallocatechin	1.38±0.34b	3.08±0.69a	1.19±0.14b	3.04±0.33a	1.69±0.38b	1.06±0.06b
Isoliquiritigenin	0.24±0.02a	0.15±0.03b	0.21±0.02ab	0.22±0.06ab	0.24±0.04a	0±0c
Naringenin	4.69±0.17a	2.92±0.28c	3.04±0.17c	3.48±0.09b	1.23±0.26d	3.76±0.14b
Naringin	26.76±0.94a	9.76±0.68b	6.64±0.44d	3.3±0.16e	8.43±1.02c	1.43±0.36f
Prunin	0.48±0.04a	0.39±0.04b	0.4±0.04b	0.35±0.03b	0.24±0.01c	0.22±0.03c
Vitexin	0±0d	0±0d	0±0d	0.16±0.02c	0.38±0.01a	0.3±0.01b
Astragalin	0.32±0.02b	0.34±0.03b	1.64±0.07a	0±0c	0±0c	0±0c
Isovitexin	0.66±0.03ab	0.41±0.04cd	0.31±0.06d	0.81±0.19a	0.72±0.2ab	0.57±0.05bc
Rhoifolin	0.17±0.03b	0.17±0.02b	0.35±0.05a	0.29±0.06a	0.2±0.04b	0.16±0.04b
Rutin	1±0.19b	2.43±0.76a	1.5±0.16b	0±0c	0±0c	0±0c
Daidzein	13.43±0.54c	10.6±0.67d	17.92±1.24a	15.23±0.33b	13.83±1.25bc	8.47±0.97e
Formononetin	0.24±0.04d	0.25±0.03d	0.46±0.05b	0.7±0.11a	0.33±0.02c	0.15±0.04e
Genistein	0.88±0.12a	0.41±0.08c	0.78±0.1ab	0.85±0.09ab	0.69±0.05b	0.77±0.12ab
Glycitein	0.21±0.03c	0.51±0.02a	0.1±0.02e	0.25±0.02b	0.17±0.02d	0.1±0.02e
Isorhamnetin	0.09±0.01b	0.05±0.01b	0.08±0.01b	0.21±0.05a	0.26±0.03a	0.26±0.03a
Puerarin	0.09±0.01c	0.1±0.02c	0.07±0.01c	0.19±0.02b	0.28±0.05a	0.02±0.01d
