# Supplementary material for: Exploration of the Commonalities and Specificities in Wheat Respond to Aluminum Toxicity and Low Phosphorus via Transcriptomics and Targeted Metabolomics Study
Source: Preprints.org preprint supplement (doi:10.20944/preprints202408.0689.v1), 2024-08-12
Supplement: Supplementary file 9 [file Table S9. Effects of Al and LP interactions on mean concentrations of carbohydrates in two genotypes wheat roots.xlsx]

## Sheet: Table S9
Table S9. Effects of Al and LP interactions on mean (±SE, n = 3) concentrations (μg·g-1 FW) of carbohydrates in two genotypes wheat roots.
Metabolite	Fielder CK	Fielder Al	Fielder LP	Ardito CK	Ardito Al	Ardito LP
Glucose	1092.46±94.88a	960.1±41.33ab	902.65±44.38bc	973.04±104.61ab	839.65±63.66bc	776.67±56.7c
Glucose 6-phosphate	7.98±0.72b	5.68±0.8b	0.89±0.07e	15.92±0.93a	2±0.35d	2.55±0.36d
Fructose	265.85±10.89b	227.89±18.74cd	251.62±16.56bc	340.47±10.63a	245.28±8.21bc	206.74±11.7d
Fructose 6-phosphate	8.18±0.33b	5.18±0.49c	0.71±0.06e	10.71±0.38a	1.18±0.1e	2.4±0.43d
Trehalose 6-phosphate	0.04±0c	0.05±0b	0.02±0e	0.32±0.42a	0.04±0.01c	0.03±0d
Glucose 1-phosphate	9.99±0.3b	9.44±0.75b	2.7±0.14d	11.83±0.72a	1.29±0.09e	4.55±0.14c
Glyceraldehyde	0.25±0.03b	0.09±0.01c	0.22±0.02b	0.31±0.02a	0.1±0.01c	0.34±0a
Glyceric acid	7.35±0.36a	6.15±0.61b	4.78±0.23cd	2.46±0.21e	5.5±0.34bc	4.14±0.65d
Pyruvic acid	16.37±0.47a	9.64±0.5d	9.96±0.89d	14.61±0.2b	9.99±0.54d	12.33±0.67c
Malic acid	55.66±0.39a	38.03±2.61c	34.16±3.14cd	47.75±2.74b	32.31±2.24d	34.99±1.16cd
Fumaric acid	2.17±0.4b	1.31±0.12c	2.48±0.22b	3.8±0.27a	2.09±0.51b	2.47±0.42b
Succinic acid	15.59±0.85a	9.42±0.98b	7.69±0.38cd	7.53±0.25c	8.11±0.79c	5.9±0.35d
Isocitric acid	0.44±0.05b	0.22±0.03c	0.24±0.04c	0.52±0.08a	0.07±0.01d	0.2±0.01c
cis-Aconitic acid	9.49±0.97a	4.37±0.79d	5.48±0.36c	6.89±0.36b	5.7±0.48c	5.01±0.1cd
Citric acid	15.52±0.23a	0.81±0.05e	6.53±0.27c	14±1.46b	1.02±0.07e	2.98±0.32d
