# Supplementary figures and images for: Exploration of the Commonalities and Specificities in Wheat Respond to Aluminum Toxicity and Low Phosphorus via Transcriptomics and Targeted Metabolomics Study
Source: Preprints.org preprint supplement (doi:10.20944/preprints202408.0689.v1), 2024-08-12

**$y = 0.8217x + 0.385532$**

**$R = 0.8885$**

**FC\_qRT-PCR**

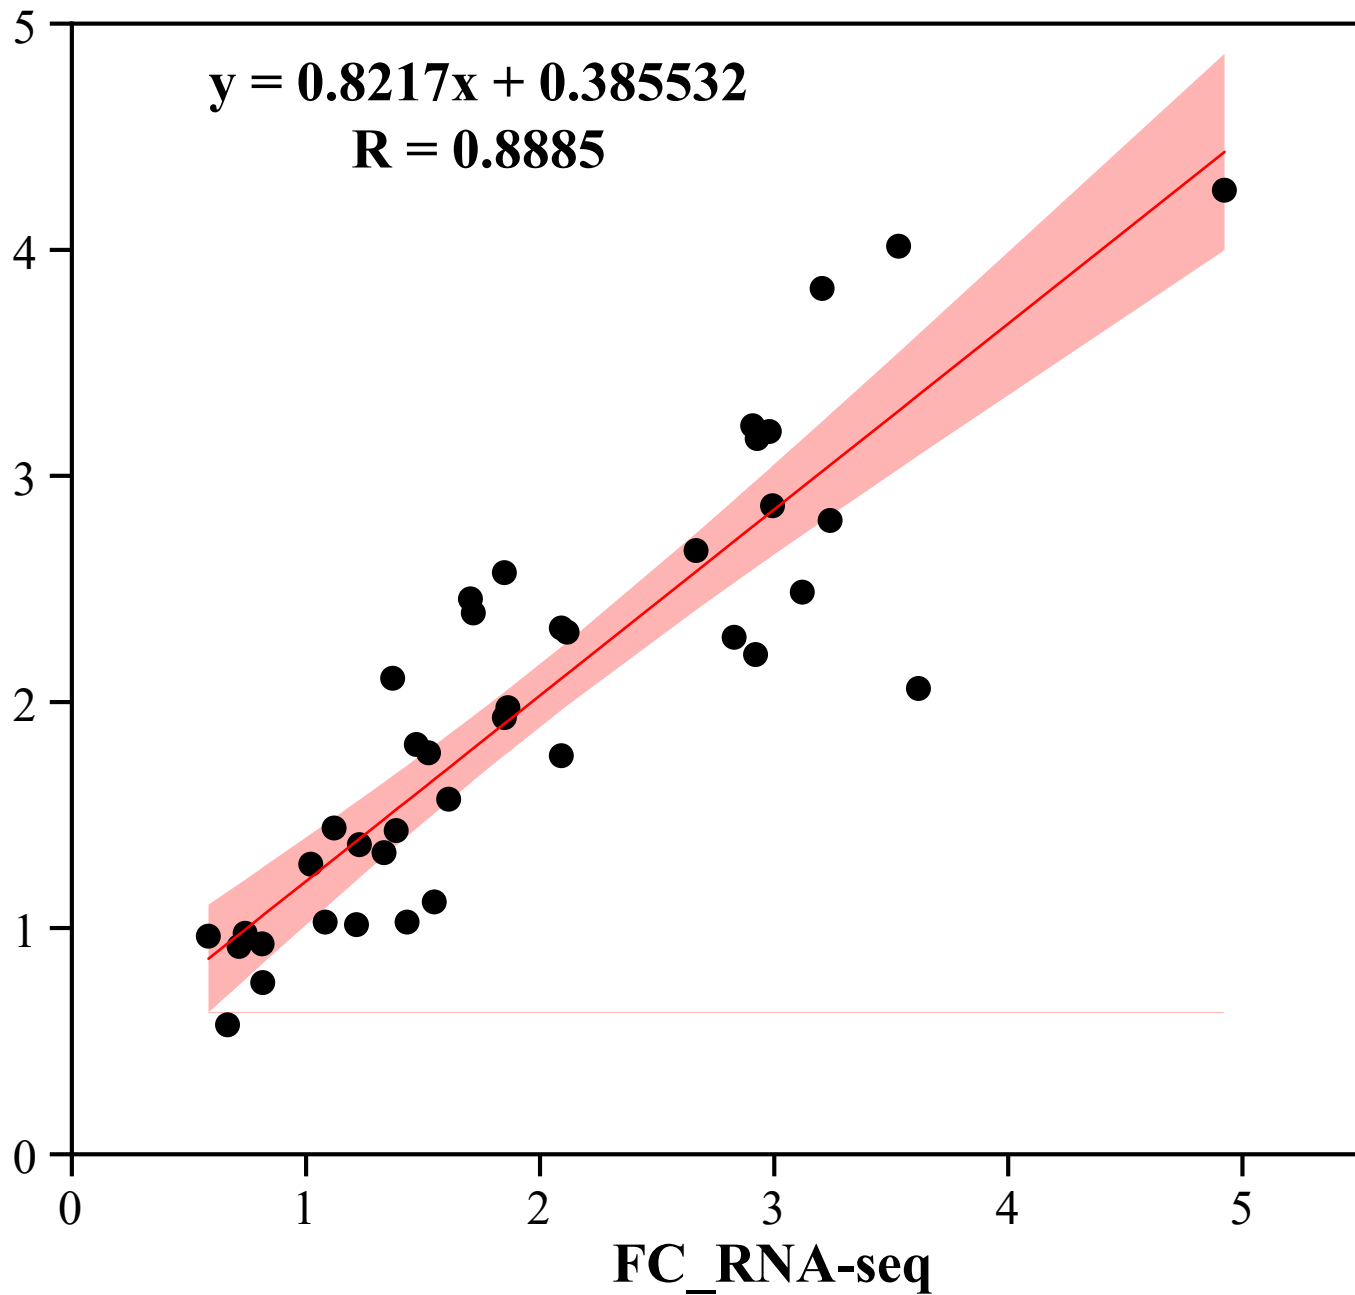

**FC\_RNA-seq**

Supplement: Supplementary file 1 [file supplementary]

Correlation between samples

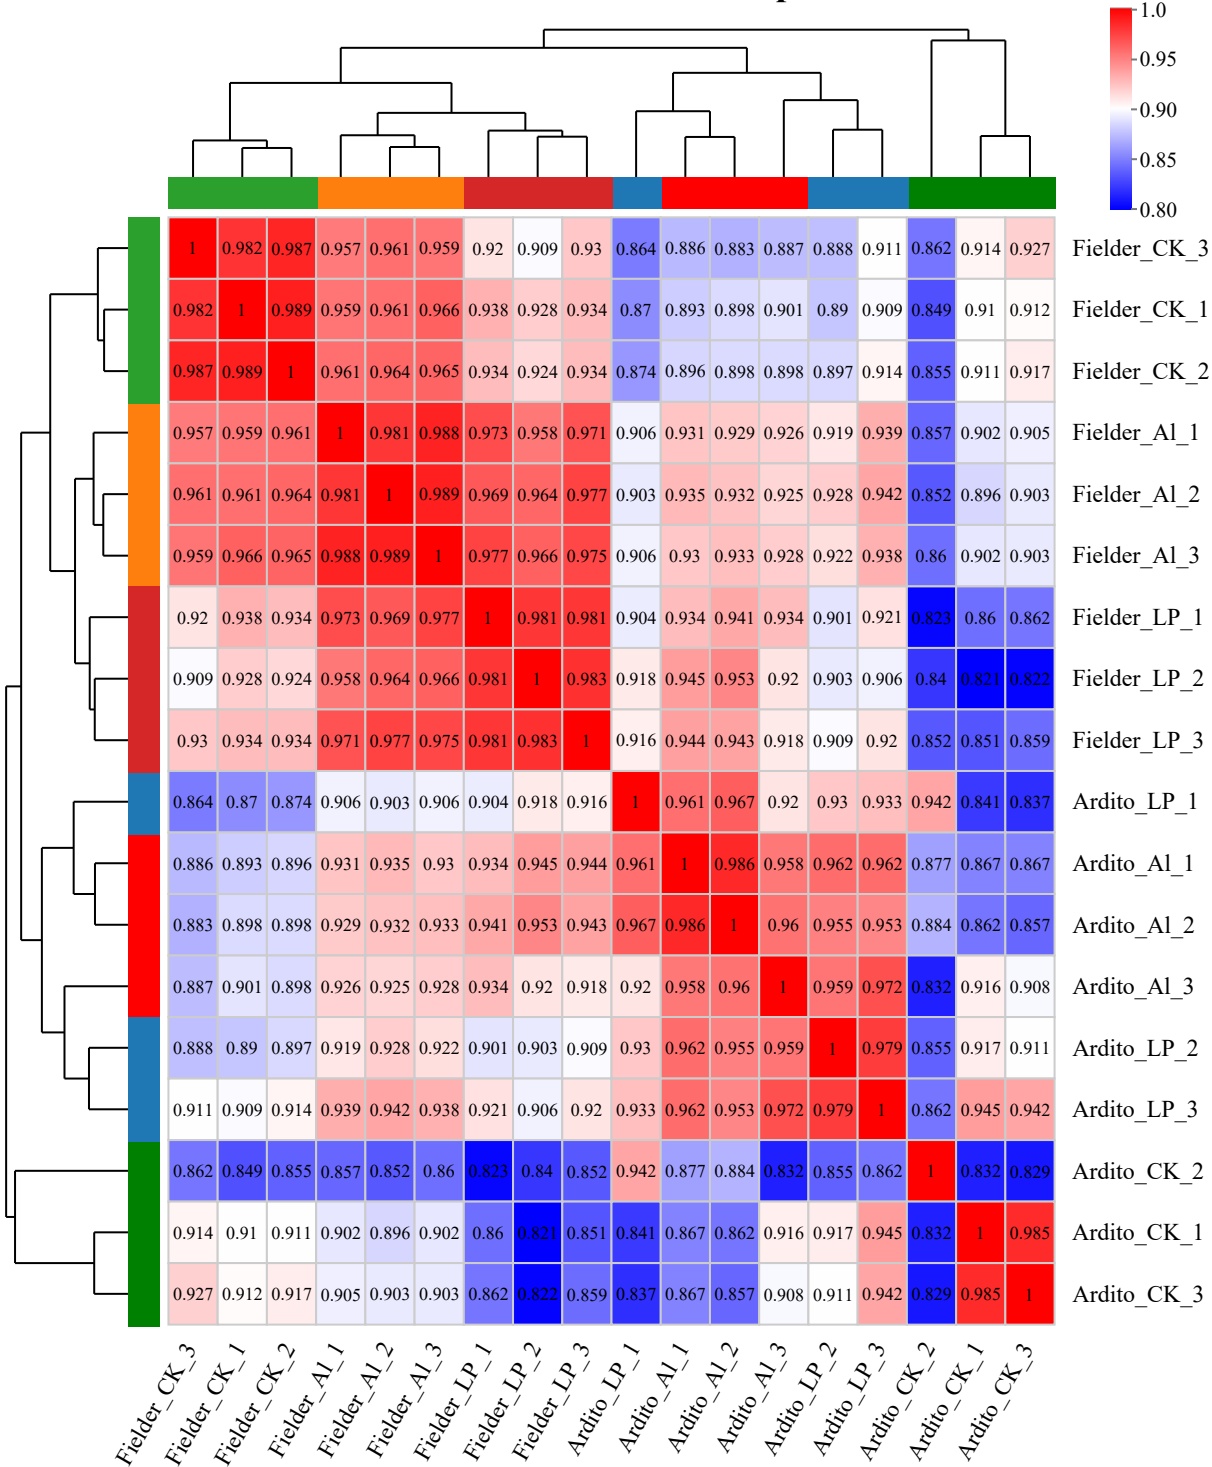

Supplement: Supplementary file 2 [file supplementary]
